# Supplementary material for: The benefits and trade-offs of multi-variable calibration of the WaterGAP global hydrological model (WGHM) in the Ganges and Brahmaputra basins
Source: Copernicus journal article supplement (doi:10.5194/hess-29-567-2025), 2025-01-30
Supplement: Supplementary file 1 [file Hasan_et_al_Supplement_B.xlsx]

## Sheet: Readme
	Supplement of
	The benefits and trade-offs of multi-variable calibration of WGHM in the Ganges and Brahmaputra basins
	Howlader Mohammad Mehedi Hasan et al.
	Correspondence to: Howlader Mohammad Mehedi Hasan (mehedi.hasan@gfz-potsdam.de)
	This Excel file provides detailed information about the Pareto solutions obtained through calibration experiments conducted in the Ganges and Brahmaputra river basins, as presented in Tables S12 and S13, respectively. Each table encompasses parameter values and calibration objectives spanning the period from 1980 to 2009. The parameter acronyms utilized within these tables are consistent with tho…

## Sheet: Ganges
Table S12. Parameters and objectives of Pareto solutions in all experiments in the Ganges River Basin
Experiment	Replication ID	SL. No.	WGHM Parameters										Calibration Objectives
			P-PM	EP-PTh	SL-MSM	SL-RC	GW-MM	SW-RRM	SW-WD	SW-DC	NA-GM	NA-SM	NSE_Q	NSE_TWSA	NSE_ET	NSE_SWSA
Q	1	1	0.929971	1.21346	2.05518	0.645603	1.68825	1.65254	2.01717	0.075615	1.93597	1.68513	0.962811	-2.85635	0.584162	0.70834
	2	2	0.865366	1.11817	2.99479	0.483993	0.309767	1.48125	6.59573	0.0938446	1.41878	1.57045	0.967252	-9.18665	0.530785	0.482495
	3	3	0.819008	0.885	2.12682	0.474801	0.3	1.48083	7.24352	0.1	0.975378	1.50674	0.968304	-2.15588	0.311096	0.449304
	4	4	1.03592	1.22275	3	0.818462	1.58832	1.7378	3.30175	0.028437	2	1.94489	0.965489	-4.0613	0.767433	0.555089
	5	5	0.833058	1.00009	2.47596	0.48542	0.3	1.56036	5.85006	0.1	0.651296	1.28273	0.96813	0.155616	0.439837	0.518695
	6	6	0.897106	1.29251	2.99061	0.563029	0.554982	2.00642	2.35927	0.0407717	1.76246	0.855801	0.966384	-9.73207	0.604049	0.65763
	7	7	1.01724	1.38266	2.77433	0.685965	1.44387	1.91106	3.56363	0.0227919	1.93743	1.80467	0.96645	-3.41982	0.612091	0.513907
	8	8	0.993012	1.55128	2.32116	0.606681	1.98612	2.11838	4.20688	0.001	1.82778	1.52411	0.966613	-1.29994	0.494073	0.576096
T	1	1	0.984052	0.885	2.95898	3	0.754875	1	1.00331	0.0999332	-1.80548	-1.47727	0.711446	0.850477	0.885353	0.642065
	2	2	0.982434	0.885992	2.88625	3	0.704066	1.0007	1.45168	0.1	-1.74191	-1.51892	0.703225	0.850464	0.889425	0.650618
	3	3	0.985248	0.885155	2.98873	2.9988	0.632521	1.00302	1.00081	0.099927	-1.32076	-1.6996	0.702288	0.853232	0.883426	0.645455
	4	4	0.984106	0.885251	2.9642	3	0.703376	1.02195	1.00028	0.0648018	-1.3453	-1.69818	0.708803	0.852732	0.885153	0.639273
	5	5	0.989981	0.885024	2.88985	2.99989	0.83383	1.08278	1.02328	0.00239359	-1.44492	-1.45933	0.705595	0.852344	0.891231	0.617376
	6	6	0.984448	0.885	2.75496	2.9962	1.05993	1.03217	1.00292	0.0025903	-1.67438	-1.15797	0.73431	0.852627	0.897831	0.606239
	7	7	0.98872	0.885	2.86065	3	0.825518	1.4176	4.85665	0.001	-1.38119	-1.33224	0.733236	0.849335	0.893009	0.625964
	8	8	0.985308	0.885033	2.62001	2.99991	1.22643	1.00444	1.01286	0.00249079	-1.8991	-1.8009	0.635839	0.852289	0.902745	0.590584
E	1	1	1.99896	0.94994	2.45524	0.618827	0.3	2.92437	17.5792	0.00101044	0.116051	-1.84781	-15.3988	0.249469	0.95959	-3.5545
	2	2	1.97174	0.935053	2.33572	0.751888	0.3	4.05522	19.1883	0.001	-0.0893941	-1.5189	-13.9923	0.00119904	0.958771	-6.56938
	3	3	1.99929	0.951638	2.51148	0.591288	0.301812	4.63216	17.8029	0.001003	-0.28105	-0.786681	-14.0831	-0.172403	0.959642	-8.53296
	4	4	1.99323	0.940422	2.37325	0.673168	0.359317	1.48416	14.6418	0.001	-0.185641	-0.13502	-15.3312	0.543108	0.959179	-0.438106
	5	5	1.99998	0.955813	2.53956	0.578684	0.300005	3.36649	20	0.00100561	1.91304	-2	-14.7953	-19.6439	0.959689	-4.8118
	6	6	1.993	0.940099	2.3388	0.7054	0.402909	3.44178	18.8535	0.001	1.13499	-0.709635	-13.9043	-2.11987	0.959116	-5.06942
	7	7	2	0.954892	2.5579	0.570852	0.303522	3.05363	19.8413	0.001	-1.78448	-1.21463	-15.4093	0.26824	0.959723	-3.60427
	8	8	1.99996	0.945233	2.42327	0.641064	0.323214	2.5798	16.0827	0.00101221	-0.681188	-1.45324	-15.7234	0.356902	0.959486	-2.53802
S	1	1	1.0016	1.45189	0.5	0.300363	0.300749	1	1.0003	0.0998819	-2	-0.724516	-0.654707	0.45323	0.0387423	0.921511
	2	2	1.00091	1.64998	0.500004	0.3	0.300126	1	1	0.0999998	-2	-0.683953	-0.544058	0.449319	0.0528539	0.921725
	3	3	1.2226	0.915272	0.509436	0.3	1.05723	1.00045	1.00021	0.001	-2	-0.971764	-3.26509	0.614293	0.0598774	0.919543
	4	4	1.32896	1.10154	0.506413	0.301939	1.82795	1	1	0.001	-1.9774	-0.649084	-3.78906	0.688228	0.220781	0.918793
	5	5	1.19539	0.911181	0.500004	0.300002	0.847649	1.00001	1.00003	0.001	-1.99822	-1.00157	-3.0829	0.583357	0.0326347	0.919776
	6	6	1.3033	0.885	0.5	0.300223	1.83286	1	1	0.001	-1.99936	-0.74222	-3.87954	0.692981	0.0752706	0.919201
	7	7	1.03539	1.40219	0.502293	0.301534	0.477537	1.00106	1.00098	0.1	-1.8975	-0.699836	-0.838319	0.507964	0.0624873	0.920384
	8	8	1.1937	0.88571	0.500413	0.300014	0.841559	1	1	0.00100197	-1.99829	-1.04468	-3.12385	0.583865	0.0105381	0.919771
QT	1	1	0.960706	0.885037	2.99933	2.99996	0.757584	1.05746	1.11761	0.0982778	-1.43189	-1.23187	0.814615	0.849612	0.881137	0.636599
		2	0.90987	0.885036	2.99997	3	0.774418	1.04973	1.11598	0.0999937	0.115867	-0.229512	0.9517	0.841632	0.873139	0.640958
		3	0.91255	0.885034	2.93489	1.44347	0.748312	1.06106	3.38742	0.0990535	0.0798693	1.08031	0.958434	0.805485	0.848505	0.673139
		4	0.932535	0.885034	2.99995	2.99975	0.76059	1.06104	1.0979	0.0990688	0.132023	-0.496773	0.936232	0.845288	0.876266	0.647096
		5	0.902245	0.885037	2.99997	2.99995	0.399293	1.05298	2.165	0.0703811	0.116407	-0.102321	0.955012	0.8365	0.871966	0.659637
	2	6	0.890836	0.885001	2.97046	1.67664	0.380082	1.34852	2.48609	0.043784	-0.00180965	0.490417	0.959837	0.814711	0.859562	0.670986
		7	0.920111	0.885081	2.97105	2.99979	0.701207	1.00022	2.08716	0.0934417	0.0812778	-0.10965	0.951309	0.840639	0.875544	0.653152
		8	0.864693	0.885085	2.96703	0.791253	0.397739	1.20823	5.5864	0.0904866	-0.020749	1.27714	0.963135	0.771941	0.695021	0.628827
		9	0.932787	0.885053	2.9703	2.99979	0.702362	1.00015	2.24652	0.0945912	-1.21996	-0.203568	0.924475	0.845301	0.87895	0.652236
		10	0.92011	0.885087	2.97042	2.98137	0.701183	1.00022	2.24644	0.0920663	-0.00124687	0.467951	0.95485	0.834741	0.874864	0.652837
	3	11	0.931475	1.03345	2.99915	1.10356	0.909535	1.64872	1.19742	0.038235	0.0991941	0.89016	0.959962	0.787838	0.87015	0.70662
		12	0.937337	0.885	2.99972	3	0.866363	1	1.16425	0.1	0.0767135	-0.268005	0.940203	0.845007	0.876785	0.64356
		13	0.911155	0.885	2.99997	3	0.838678	1.00055	1.16228	0.0989317	0.099698	-0.171713	0.952067	0.841404	0.873327	0.633594
		14	0.919867	0.885	2.99914	2.59112	0.842148	1.22067	1.1723	0.0915618	0.0318462	0.39748	0.955043	0.832704	0.875334	0.668211
	4	15	0.908328	0.885	2.99603	1.00129	0.690084	1.78615	2.16494	0.0427042	-0.94712	1.76549	0.959845	0.796544	0.80636	0.698454
		16	0.915187	0.885002	2.99975	2.99957	0.719077	1	1.68134	0.0987185	0.111992	-0.164109	0.952156	0.841246	0.873754	0.648145
		17	0.915182	0.885	2.99975	2.99999	0.692366	1	2.00246	0.0892275	0.0963915	0.206668	0.954989	0.836174	0.873374	0.653601
		18	0.933922	0.885963	2.99975	2.99997	0.719088	1	1.69949	0.0885768	-1.07593	-0.164185	0.928234	0.845063	0.878369	0.648752
	5	19	0.932526	0.885	2.98307	3	0.781543	1.01708	1.27091	0.0980903	-1.03219	-0.164278	0.928334	0.845094	0.878586	0.644834
		20	0.911055	0.885054	2.99072	2.95912	0.683844	1.01803	1.37519	0.0991057	0.0776121	-0.167486	0.952077	0.840682	0.873756	0.648876
		21	0.915743	0.885053	2.80068	2.05753	0.58458	1.04888	4.34092	0.0986242	-1.01779	1.18509	0.955412	0.823449	0.870412	0.658634
		22	0.896751	0.885048	2.99123	0.932601	0.651338	1.25569	5.04807	0.0976837	-0.48705	1.49557	0.960386	0.790689	0.77158	0.655103
	6	23	0.912567	0.885064	2.99991	3	0.681544	1.03251	1.12952	0.0522517	0.104787	-0.190454	0.951093	0.841058	0.874249	0.63421
		24	0.943419	0.885064	2.99761	3	1.01515	1.03269	1	0.024373	0.102422	-0.248673	0.938617	0.845039	0.878719	0.610267
		25	0.917813	0.885002	2.99758	1.56137	1.00456	1.67422	1.0007	0.00153916	-0.542241	0.896962	0.955419	0.81936	0.873094	0.688641
		26	0.828473	0.885	2.98916	0.402356	0.47355	2.00428	4.60782	0.0253789	0.186984	1.48204	0.964984	0.729089	0.353025	0.500651
		27	0.841359	0.885005	2.98947	0.474069	1.02385	2.03911	1.60423	0.0237371	-0.432207	1.47417	0.959661	0.76392	0.474308	0.744533
	7	28	0.909514	0.885146	2.99967	2.99999	0.708428	1.03872	1.27012	0.0992596	0.116499	-0.199977	0.952262	0.841177	0.873081	0.646185
		29	0.934226	0.885931	2.99396	2.99996	0.87979	1	1.20908	0.0878891	0.131503	-0.510571	0.937325	0.845226	0.877336	0.631466
		30	0.909422	0.885146	2.99961	2.61673	0.67862	1.13943	1.43296	0.0992676	0.0199029	0.216638	0.955225	0.83335	0.873622	0.670622
	8	31	0.916966	0.885009	2.99996	1.31844	0.79107	1.47803	1.95664	0.0637409	-0.0211278	0.993358	0.959928	0.807908	0.848638	0.692436
		32	0.913546	0.885006	2.99999	2.99997	0.888849	1.00012	1.04928	0.0981645	0.118095	-0.181821	0.951557	0.841876	0.87369	0.629972
		33	0.918581	0.885007	2.9996	2.738	0.790007	1.03314	1.81964	0.0982704	0.0454799	0.341406	0.955257	0.834123	0.874527	0.656608
		34	0.934497	0.885478	3	2.99985	0.991948	1.00047	1.00254	0.0983761	0.118487	-0.342064	0.942067	0.845041	0.876709	0.630406
QE	1	1	1.04653	0.978509	2.52778	2.42766	2.82486	1.76634	19.9561	0.00104684	1.99982	1.99995	0.958586	-6.57947	0.929847	-0.174284
		2	1.31058	0.949831	2.30042	1.96074	2.99541	3.22136	19.942	0.00186778	1.99913	1.99587	0.351963	-2.3435	0.944848	-0.667912
		3	1.11641	0.97283	2.44513	2.48357	2.99961	2.13306	19.8676	0.00116385	1.98424	1.99625	0.933087	-4.81081	0.934863	-0.110326
		4	1.74805	0.948975	2.44135	0.860113	2.99725	4.29166	19.9457	0.0018696	1.99906	1.99587	-3.80799	-0.946909	0.955384	-3.55942
		5	1.45934	0.949493	2.29895	1.49618	2.99009	4.24441	19.9423	0.00186923	1.98672	1.99626	-0.601629	-1.49941	0.949857	-1.87813
		6	1.20604	0.958361	2.31691	2.45074	2.99853	2.7018	19.951	0.00190077	1.99963	1.99626	0.760733	-3.62564	0.939842	-0.352718
	2	7	1.20223	0.960408	2.28577	2.73525	2.99933	2.85611	19.8341	0.00107871	1.99989	1.99949	0.748815	-3.88912	0.939878	-0.269563
		8	0.90493	0.923631	2.99951	0.700579	0.43578	2.38353	19.3845	0.00150893	1.936	1.29831	0.965451	-19.6949	0.745764	0.231443
		9	1.30289	0.947322	2.28122	2.15025	2.99972	3.2144	19.8287	0.00104358	1.99818	1.84079	0.317655	-2.46315	0.944854	-0.468163
		10	1.04953	0.9853	2.45917	2.76466	3	1.76741	19.8332	0.00100131	1.9982	2	0.958849	-6.70382	0.92998	-0.171866
		11	1.4519	0.946196	2.20421	1.77447	2.90342	4.01675	19.8708	0.00109657	2	1.86716	-0.701907	-1.65259	0.949889	-1.52638
		12	1.11169	0.966865	2.36245	2.8556	2.99997	2.15378	19.9221	0.00100106	1.99841	1.99994	0.93162	-5.31119	0.934866	-0.0976922
	3	13	1.2077	0.967806	2.36293	2.19863	2.99984	2.71577	19.992	0.00121739	1.99928	1.99368	0.750061	-3.42005	0.94	-0.22663
		14	1.06451	0.975521	2.48655	2.49385	2.9743	1.87239	19.9429	0.0010103	1.98854	2	0.960117	-5.89479	0.9314	-0.132027
		15	1.45105	0.929992	2.08786	2.40954	2.99576	4.45001	19.9602	0.00126136	1.99139	1.8724	-0.719664	-1.94183	0.950006	-2.04964
		16	1.1238	0.968189	2.43369	2.4755	2.99885	2.13006	19.9875	0.00182813	1.98766	1.99983	0.928672	-4.71095	0.935003	-0.248648
		17	1.3201	0.947687	2.2025	2.47373	2.99938	3.20084	19.9791	0.00258614	1.99134	1.98978	0.310265	-2.5905	0.945012	-0.88709
	4	18	1.21554	0.974098	2.48347	1.8158	2.99374	2.73135	19.9118	0.00140837	1.99851	1.99264	0.747905	-3.01736	0.940017	-0.23021
		19	1.46518	0.943049	2.18807	1.79193	2.99751	4.54906	19.7152	0.00213896	1.98956	1.99035	-0.675897	-1.67603	0.950001	-2.33213
		20	1.74654	0.943696	2.23736	1.07964	2.9946	4.49438	20	0.00207393	1.98995	1.99262	-3.83821	-1.07514	0.955018	-4.07778
		21	1.1323	0.974195	2.60104	1.85562	2.99207	2.00627	19.9504	0.0021203	1.99868	1.99354	0.926974	-4.03492	0.935001	-0.227628
		22	1.06317	0.987347	2.68575	1.85567	2.36941	1.92131	19.8925	0.0010144	1.99866	1.99264	0.960916	-5.95817	0.930709	-0.0978224
		23	1.31988	0.955411	2.34804	1.81161	2.99753	3.50089	19.7937	0.00224207	1.99169	1.99287	0.331419	-2.19788	0.945007	-0.897867
	5	24	1.69229	0.95348	2.54792	0.804247	2.9898	5	19.8728	0.00131715	1.88748	1.06546	-3.44662	-0.7701	0.955001	-3.78735
		25	1.48977	0.932846	2.07161	2.26423	2.99015	3.76478	19.9195	0.00441313	1.89626	1.86415	-0.86817	-1.40794	0.950087	-2.36959
		26	1.05786	0.979914	2.68715	1.86124	2.3669	1.88963	18.947	0.00115	1.89194	1.88049	0.960615	-4.80011	0.930235	-0.039312
		27	1.32356	0.951195	2.2136	2.41309	2.98818	3.2803	19.9813	0.00285332	1.9307	1.87025	0.282465	-2.21409	0.945012	-0.961484
		28	1.11726	0.978185	2.42453	2.40856	2.99767	2.12603	19.9757	0.00115061	1.99784	1.69224	0.918689	-4.56441	0.935111	-0.00103514
		29	1.19773	0.95351	2.25615	2.98144	2.98642	3.15559	19.9559	0.00116991	1.89224	1.64705	0.71156	-3.1941	0.940001	-0.300565
	6	30	1.11686	0.961847	2.32509	2.99732	2.99458	2.21344	19.9335	0.00199689	1.9103	1.63325	0.912766	-4.23403	0.935006	-0.151202
		31	1.05325	0.978987	2.51076	2.51695	2.85296	1.78029	14.7712	0.00102036	1.98738	1.80669	0.960218	-5.98091	0.93055	0.110309
		32	1.21372	0.96011	2.36261	2.11695	2.97447	2.3076	19.9076	0.00247749	1.91004	1.86605	0.734586	-2.66836	0.94008	-0.269862
		33	1.31568	0.951632	2.36261	1.77357	2.99478	3.32792	19.9879	0.00247752	1.90949	1.63324	0.294414	-1.70678	0.945002	-0.742755
		34	1.48143	0.951761	2.41535	1.1758	2.99394	3.94578	19.9253	0.0034714	1.90729	1.71823	-0.759491	-1.01023	0.95003	-1.92478
	7	35	1.12319	0.973173	2.50678	2.14025	2.99398	2.14247	19.6204	0.00168019	1.99063	1.92969	0.928451	-4.3416	0.935017	-0.149658
		36	1.32196	0.968301	2.50026	1.38406	2.99968	3.27078	19.6247	0.00233771	1.99733	1.51273	0.274686	-1.67217	0.945006	-0.589425
		37	1.46851	0.959162	2.50782	1.11308	2.99901	4.09526	19.5914	0.00177808	1.99531	1.53417	-0.741363	-1.1449	0.950004	-1.51829
		38	1.22549	0.972703	2.64586	1.38515	2.99403	2.60878	19.5493	0.00168019	1.99012	1.92095	0.722299	-2.31616	0.940162	-0.149491
		39	1.06556	0.985495	2.64767	1.92064	2.53879	1.84213	19.6725	0.00130276	1.98716	1.96377	0.960363	-5.58518	0.930845	-0.124337
	8	40	1.12512	0.975299	2.53445	2.03398	2.99514	2.06599	19.3095	0.00172454	1.98657	1.98189	0.929721	-4.18748	0.935001	-0.147427
		41	1.4728	0.958632	2.45611	1.17598	2.97289	4.25101	19.9521	0.0017248	1.98653	1.993	-0.676319	-1.27998	0.950006	-1.82009
		42	1.06211	0.984173	2.58483	2.08174	2.50608	1.93119	19.0824	0.00100019	1.98739	1.99581	0.960646	-5.95672	0.930947	-0.0856471
		43	1.31418	0.94752	2.20359	2.54244	2.99403	3.13722	19.314	0.00172037	1.98626	1.98277	0.302956	-2.61026	0.945015	-0.635386
		44	1.21125	0.953264	2.30703	2.52096	2.99343	2.69604	19.9293	0.00219713	1.98376	1.99224	0.747032	-3.51589	0.94001	-0.410231
		45	1.74532	0.95865	2.4576	0.83809	2.97278	4.92296	19.9455	0.00138889	1.98538	1.98319	-3.80717	-1.04251	0.95522	-4.42446
QS	1	1	0.710326	1.05424	1.19319	0.301902	0.646123	1.8804	1.00246	0.0994986	1.99604	0.00404757	0.954141	-12.524	-0.180703	0.857308
		2	0.84602	1.62683	0.5	0.300206	0.300915	1.26628	1	0.1	-1.80438	0.0154412	0.50403	0.459641	-0.0767453	0.909993
		3	0.966285	1.63572	0.677696	0.304242	0.319717	1.03482	1.00129	0.0990028	-1.70959	0.125236	-0.0534757	0.472928	0.0850639	0.914914
		4	0.819847	1.62504	0.516213	0.310549	0.326579	1.27602	1.00027	0.0904751	-1.4566	0.13011	0.646948	0.463899	-0.0832777	0.904483
		5	0.676637	1.0309	0.500151	0.300217	0.635675	1.87733	1.00033	0.0994967	1.99472	0.00444248	0.949983	-13.6075	-0.489897	0.868368
		6	0.703345	1.56328	0.505875	0.301888	0.313127	1.41974	1.00242	0.0972048	1.9963	0.00397484	0.913504	-25.9468	-0.284883	0.890244
		7	0.830102	1.21094	1.66643	0.546116	0.942131	1.68504	1.00122	0.097323	1.88144	0.389263	0.959483	-5.77417	0.409069	0.819966
		8	0.726619	1.65	0.5	0.3	0.308826	1.5975	1	0.0970467	-1.76889	0.12663	0.872273	0.459227	-0.212669	0.893875
		9	0.761478	1.62964	0.5	0.300001	0.31766	1.38533	1.01123	0.0990417	-1.66875	0.131791	0.793753	0.458019	-0.171822	0.898864
		10	0.67457	1.50338	0.500204	0.300048	0.309495	1.57832	1.00076	0.0995042	1.99083	-0.011191	0.932543	-26.2728	-0.34875	0.886667
		11	0.674412	1.50032	0.500598	0.300704	0.325514	1.7301	1	0.0999985	1.99049	-0.0588906	0.940897	-25.4058	-0.347192	0.88166
		12	0.665636	1.19619	0.5	0.3	0.421262	1.80797	1.00021	0.0999992	2	-0.00688813	0.945389	-21.217	-0.444161	0.876548
	2	13	1.9581	1.25982	2.09448	0.402644	2.3388	1.20198	2.58703	0.0984197	-0.63201	1.98141	-10.7023	0.465643	0.737998	0.145535
		14	0.717368	1.64993	0.501531	0.300477	0.346877	1.40576	1.00001	0.0999628	1.99752	-0.0410851	0.907643	-24.0831	-0.252742	0.890406
		15	0.874484	1.05042	2.39951	0.650832	0.795853	1.57438	2.3874	0.0999068	1.98969	1.0391	0.963924	-10.4437	0.614291	0.731186
		16	0.684477	1.48687	0.5	0.3	0.433414	1.79698	1	0.0998234	1.94226	-0.0480771	0.944722	-18.6176	-0.33288	0.877024
		17	0.757485	1.64997	0.501546	0.303227	0.341157	1.29454	1.00044	0.0999634	1.99137	0.00265109	0.852356	-23.7709	-0.194501	0.895097
		18	0.715657	1.48581	0.9952	0.300106	0.517687	1.81569	1.00011	0.0999995	1.97673	-0.00107955	0.94954	-15.8289	-0.136859	0.868517
		19	0.718709	1.0269	1.90805	0.323036	0.424416	1.80524	1.00005	0.0999884	1.99021	0.000463817	0.954638	-19.6392	-0.00833472	0.857172
		20	0.769596	1.02948	1.89525	0.565551	0.375619	1.73179	1.00644	0.0999998	1.94095	0.00995332	0.959675	-21.4361	0.39273	0.830467
		21	0.677635	1.64099	0.500012	0.300358	0.306205	1.63828	1	0.1	1.97908	-0.0368089	0.935923	-25.925	-0.316676	0.885282
		22	0.67954	1.65	0.5	0.3	0.338816	1.73677	1	0.099659	2	-0.0565866	0.941088	-25.0217	-0.311477	0.881318
	3	23	0.687827	1.31473	0.554355	0.300203	0.511561	1.91897	1.00017	0.0999955	1.92074	0.0234221	0.949954	-15.1017	-0.344586	0.868147
		24	0.768212	1.10964	2.69727	0.415765	0.382572	1.87566	1.00015	0.0998172	1.81467	0.0439833	0.959735	-16.046	0.337348	0.837775
		25	0.667501	1.46509	0.500441	0.300004	0.302703	1.75479	1.00006	0.1	2	-0.00269575	0.941207	-27.0751	-0.369386	0.881283
		26	0.853213	1.6488	0.50036	0.304384	0.301713	1.18965	1.00011	0.1	-1.45961	0.0275657	0.490571	0.456764	-0.063488	0.910088
		27	0.785127	1.64999	0.504607	0.308053	0.314179	1.4035	1	0.1	-1.02856	0.0278469	0.765143	0.455816	-0.130936	0.900002
		28	0.680339	1.46508	0.5	0.300013	0.389504	1.82601	1.00015	0.1	1.99996	-0.00317057	0.945221	-22.5371	-0.34602	0.876368
		29	0.738677	1.64883	0.501015	0.300031	0.307531	1.54289	1.00216	0.0996974	-1.22983	0.0335627	0.859833	0.457675	-0.200159	0.895045
		30	0.671969	1.4608	0.501441	0.300008	0.303296	1.64635	1.00004	0.1	1.99993	-0.00217407	0.936245	-27.0234	-0.362319	0.8852
		31	0.704324	1.65	0.503969	0.300031	0.313086	1.45362	1.00198	0.0999922	1.97709	0.00145221	0.917157	-25.2057	-0.273272	0.890184
		32	0.911889	1.64883	0.507107	0.300779	0.321256	1.08484	1.00006	0.099952	-1.6967	0.031597	0.189399	0.459152	-0.0118472	0.915076
		33	0.808135	1.64055	0.53449	0.301671	0.308127	1.30755	1.00012	0.0993151	-1.68645	0.0273937	0.664193	0.461222	-0.100171	0.90503
		34	0.682812	0.895168	1.58694	0.300004	0.369077	1.85217	1	0.099339	1.44773	0.0274085	0.95494	-7.5316	-0.239768	0.85838
	4	35	0.785676	1.60369	0.503987	0.302058	0.302405	1.29936	1.00001	0.0996955	-0.500766	-0.0721233	0.750953	0.440193	-0.150171	0.900006
		36	0.713486	0.936115	1.49366	0.438915	0.300054	1.9265	1.00001	0.0999561	0.780753	0.0248534	0.959827	-0.449723	0.0763696	0.835691
		37	0.660522	1.31553	0.500257	0.300058	0.304737	1.73081	1	0.0999894	1.99986	-0.0895242	0.941198	-27.0104	-0.417184	0.881588
		38	0.660522	1.26812	0.500384	0.300063	0.304723	1.83034	1	0.0999898	1.99978	-0.0897801	0.945319	-26.9937	-0.430887	0.876817
		39	0.667859	1.44451	0.50414	0.300001	0.300102	1.6393	1.00006	0.0996921	2	-0.019374	0.93607	-27.1937	-0.371558	0.885256
		40	1.34707	1.43055	0.507472	0.3	2.15109	1	1	0.00106508	-1.47644	-0.138354	-3.1181	0.707565	0.266681	0.915113
		41	0.754437	1.64314	0.585412	0.300006	0.305233	1.25113	1	0.0996924	2	0.0211799	0.852477	-26.0067	-0.176889	0.895025
		42	0.660845	1.12033	0.618811	0.300027	0.34882	1.92285	1.00031	0.0999234	1.63932	-0.0896261	0.950068	-13.0061	-0.426235	0.867965
		43	0.858776	1.59367	0.541319	0.300277	0.301	1.15895	1.01012	0.0996623	-1.32981	0.022313	0.464617	0.455776	-0.0558467	0.910035
		44	0.669224	0.936115	1.49366	0.300833	0.300054	1.92918	1.00007	0.0999515	0.780753	0.0251096	0.955249	-0.42572	-0.25606	0.855148
		45	0.702473	1.63303	0.506207	0.300025	0.300123	1.36017	1	0.0996948	1.99977	0.00971653	0.908975	-26.8247	-0.278456	0.890701
		46	0.833488	1.62285	0.505291	0.302432	0.325246	1.13164	1.01527	0.0996731	-0.557291	-0.0738817	0.590931	0.440952	-0.09246	0.90505
	5	47	0.862982	1.65	0.533673	0.300005	0.323339	1.07223	1.00011	0.1	1.99603	-0.241767	0.532419	-23.9464	-0.0669749	0.905123
		48	0.695106	0.944761	1.87811	0.3	0.377478	1.84652	1.00276	0.0999528	1.96196	0.00298772	0.954749	-20.8602	-0.1476	0.858338
		49	0.664764	1.28627	0.504115	0.300083	0.302477	1.58275	1	0.0998866	1.95968	0.00679742	0.933147	-25.5494	-0.417932	0.886384
		50	0.851752	1.08413	2.24092	0.545206	0.668085	1.58436	3.10248	0.0999292	1.83692	0.910109	0.964893	-9.06673	0.507275	0.70721
		51	0.664354	1.27524	0.500014	0.300082	0.34553	1.72872	1.00001	0.0999968	1.99481	0.00941203	0.941191	-24.6833	-0.422809	0.881347
		52	0.742718	1.62255	0.501122	0.300021	0.301315	1.25888	1.00019	0.0999538	1.98	0.0650449	0.86017	-25.6628	-0.225261	0.895213
		53	0.6841	1.08411	0.996428	0.300044	0.419547	1.81605	1.00001	0.0999343	1.85184	0.0104947	0.950346	-16.0145	-0.272743	0.867854
		54	0.663245	1.24605	0.500111	0.300079	0.348108	1.81736	1	0.1	1.99484	-0.0600204	0.945191	-24.4724	-0.432366	0.877019
		55	0.70751	1.62319	0.536997	0.300114	0.317738	1.3943	1.00121	0.099849	1.9616	0.00402754	0.911772	-24.3284	-0.260996	0.890238
		56	0.821153	1.62228	0.565193	0.300164	0.301315	1.09203	1.02029	0.099953	1.84154	0.0757529	0.684588	-20.0255	-0.106448	0.900532
		57	0.772659	1.12821	2.62136	0.398222	0.461326	1.88409	1.00132	0.099984	1.99928	0.115854	0.959736	-18.4267	0.314807	0.837933
	6	58	0.79386	1.39063	2.60513	0.367209	0.632578	1.93918	1	0.0999979	1.99954	0.14935	0.959718	-12.417	0.316091	0.835749
		59	0.680941	1.29553	0.51587	0.300001	0.433643	1.79926	1.00002	0.0999817	1.99936	-0.00279815	0.945136	-20.4876	-0.379016	0.876441
		60	0.68153	1.43037	0.500168	0.300005	0.429776	1.71382	1.00008	0.099991	1.99936	-0.00641597	0.941192	-20.7147	-0.350994	0.880696
		61	0.925226	1.5384	0.507214	0.308151	0.365545	1.0537	1.00101	0.0993252	-1.69272	-0.539119	0.0437567	0.470574	2.14976e-05	0.915544
		62	0.74251	1.3118	2.44907	0.308215	0.490237	1.80052	1.00001	0.0999866	1.99912	0.0312689	0.954616	-16.8401	0.121375	0.857053
		63	0.89032	1.50558	0.722828	0.30005	0.498358	1.02349	1	0.0999553	1.99974	-0.00956969	0.519681	-15.9515	0.00656635	0.90059
		64	0.706277	1.64247	0.522035	0.300003	0.433077	1.5072	1.00385	0.0999919	2	-0.00479408	0.927735	-20.2446	-0.262971	0.885832
		65	0.9456	1.64993	0.514269	0.300004	0.432434	1	1	0.1	2	-0.565808	0.156511	-18.5052	0.000623427	0.910125
		66	0.737105	1.60903	0.509418	0.30015	0.43393	1.3916	1.00065	0.0999983	1.99998	0.0319491	0.897852	-19.9617	-0.228957	0.890139
		67	0.805139	0.900578	2.78729	0.392009	0.512201	1.55844	4.94858	0.099526	1.99952	1.00251	0.964867	-16.6419	0.264467	0.634228
		68	0.818942	1.65	0.5	0.3	0.450048	1.27895	1.00001	0.0999871	2	-0.0707524	0.745865	-18.4213	-0.124209	0.895998
		69	0.907876	1.65	0.502161	0.300002	0.510052	1.02938	1.00003	0.0996211	1.87079	-0.492531	0.38925	-12.2106	-0.0336315	0.905655
		70	0.702983	1.48047	0.701063	0.30005	0.502694	1.89601	1.0012	0.0999968	2	-0.0102286	0.949955	-17.3779	-0.235311	0.867954
	7	71	1.64819	1.50664	0.859821	0.510628	0.806138	1.55977	3.58583	0.0851762	-1.33241	-0.416937	-7.51835	0.5763	0.368511	-0.219123
		72	0.782363	1.29672	1.41083	0.310204	1.11722	2.04608	1.00002	0.0999996	1.94561	0.506793	0.959794	-4.22952	0.0438636	0.824483
		73	0.819735	1.6466	0.598886	0.300368	0.300148	1.2729	1.00155	0.0999975	-1.28502	0.00204125	0.648471	0.458681	-0.0705489	0.90501
		74	0.756269	1.61376	0.550041	0.303395	0.305653	1.29244	1.00079	0.0999754	1.9896	-0.00340203	0.850688	-25.5408	-0.184377	0.89527
		75	0.866841	1.64713	0.601721	0.300143	0.30341	1.15884	1.00014	0.0999565	-1.40135	-0.0315164	0.45211	0.460343	-0.022343	0.910068
		76	0.662261	1.3412	0.503366	0.300016	0.301545	1.72729	1.00019	0.0999386	1.94451	-0.0751533	0.940936	-25.0084	-0.406004	0.881825
		77	0.770841	1.64624	0.513863	0.300246	0.300268	1.35701	1.00003	0.0999023	-1.20196	-0.026632	0.777876	0.45054	-0.154803	0.90009
		78	0.680903	1.64113	0.510961	0.300433	0.300138	1.58911	1	0.0999979	1.995	-0.025786	0.933031	-26.841	-0.307648	0.886617
		79	0.665973	1.35188	0.537131	0.300021	0.307686	1.80599	1.00002	0.0999756	1.31834	-0.076261	0.944947	-6.97916	-0.381381	0.877025
		80	0.705694	1.54262	1.41461	0.30037	0.30771	2.012	1.00002	0.0999747	1.3605	-0.0763591	0.954622	-7.33055	-0.0615598	0.852899
		81	0.705027	1.54266	1.41461	0.300223	0.307762	1.80599	1.00002	0.0999747	1.37884	-0.0763767	0.949962	-7.70674	-0.0630572	0.86759
		82	0.7077	1.63373	0.551853	0.300365	0.300229	1.43098	1.00001	0.0999434	1.97535	-0.0093774	0.914281	-25.7666	-0.253713	0.89033
	8	83	0.859006	1.62801	0.512481	0.306415	0.335174	1.18593	1.00248	0.0997451	-1.68098	-0.0363237	0.464222	0.466202	-0.0508915	0.91006
		84	0.73192	1.64997	0.500678	0.300738	0.30002	1.53939	1.00239	0.0997361	-1.72547	0.162218	0.861152	0.454396	-0.205882	0.895095
		85	0.77049	1.64738	0.510682	0.300731	0.300039	1.40928	1.00376	0.0994438	-1.72539	0.274992	0.781801	0.455255	-0.154946	0.900135
		86	0.683102	1.64922	0.699874	0.300234	0.33476	1.94647	1.00286	0.0996058	-0.150355	-0.0344529	0.949994	0.477844	-0.228292	0.868227
		87	0.788751	1.53309	2.808	0.401721	0.340902	1.95504	1.00335	0.099998	1.35141	0.0320991	0.960074	-6.18762	0.367021	0.833678
		88	0.928405	1.63222	0.511607	0.306349	0.300398	1.03447	1.00247	0.099865	-1.6918	0.159632	0.0980214	0.45189	0.00653577	0.915336
		89	0.716545	1.39736	2.47187	0.300711	0.302237	1.90864	1.00378	0.0954882	-0.120537	0.0190279	0.954621	0.562729	0.0885252	0.855914
		90	0.681714	1.55676	0.529702	0.300442	0.338464	1.72238	1.00013	0.0997719	1.83457	-0.0376351	0.940874	-19.1625	-0.313326	0.88133
		91	0.705944	1.64771	0.510834	0.300375	0.301067	1.65089	1.00267	0.0994296	-1.63712	0.298837	0.90649	0.456675	-0.241956	0.890228
		92	0.671253	1.63187	0.512565	0.30023	0.30099	1.84787	1.00009	0.0970706	-0.254364	-0.0245484	0.945377	0.455133	-0.307034	0.877168
		93	0.807722	1.64994	0.50016	0.306237	0.300025	1.31599	1.01542	0.0999995	-1.7527	0.163165	0.668925	0.456765	-0.106753	0.905004
		94	0.679419	1.54968	0.513253	0.300698	0.300548	1.58045	1.00773	0.099636	1.46791	-0.0230446	0.932864	-10.3198	-0.324659	0.886139
TE	1	1	1.11538	0.956456	2.40374	2.72625	0.982102	1.00001	5.57156	0.00198124	-1.99874	-1.91586	0.0189685	0.839136	0.936631	0.629619
		2	0.994304	0.92922	2.63075	2.99993	0.94148	1.00001	2.75285	0.00337771	-1.99697	-1.91838	0.617691	0.848808	0.919098	0.566777
		3	1.28859	0.936212	2.19656	2.65376	0.980446	1.00114	6.80854	0.00192308	-1.99866	-1.91653	-1.63482	0.81612	0.945379	0.700287
		4	1.40862	0.935586	2.19917	1.98207	0.973846	1.00157	11.6644	0.00134088	-1.9984	-1.97538	-3.13794	0.796745	0.950093	0.67695
		5	1.02773	0.968058	2.48549	2.99986	0.976156	1.00118	3.16827	0.00280228	-1.99584	-1.92569	0.498063	0.845732	0.930314	0.589897
		6	1.18303	0.948773	2.32237	2.93256	0.942113	1.00018	6.65468	0.00191869	-1.99872	-1.73567	-0.474591	0.831959	0.940005	0.658446
		7	1.6394	0.930899	2.19911	1.25494	0.836422	1.00191	12.8154	0.00185149	-1.9984	-1.92355	-7.18016	0.752289	0.955031	0.572038
	2	8	1.02884	0.970986	2.46767	2.99878	1.27602	1.00011	2.47957	0.00139824	-1.99794	-1.37734	0.580204	0.846307	0.93082	0.610936
		9	1.08488	0.959478	2.37329	2.99866	1.24981	1.00026	5.85053	0.00139642	-1.99977	-1.38243	0.314301	0.842587	0.935197	0.620864
		10	1.16789	0.954977	2.31787	2.74883	1.15218	1.0002	8.02904	0.00138888	-1.99991	-1.07932	-0.174443	0.832923	0.940091	0.657455
		11	1.42863	0.929503	2.17377	2.2063	1.00584	1.00012	10.003	0.00143247	-1.99682	-1.9973	-3.47664	0.79622	0.950158	0.694724
		12	1.27266	0.945643	2.30535	2.11352	1.01005	1.00024	9.03568	0.0014305	-1.99541	-1.1411	-1.16367	0.817244	0.945009	0.69525
		13	1.66648	0.944755	2.48023	0.886632	0.777732	1.00021	8.61249	0.00143218	-1.99979	-1.99928	-7.8379	0.752846	0.955003	0.700564
	3	14	1.17433	0.945816	2.2633	2.99592	1.16548	1.00019	8.67085	0.00131477	-1.99569	-1.2076	-0.276457	0.832829	0.940438	0.65614
		15	1.10471	0.953727	2.37836	2.99435	1.18309	1.00006	4.10471	0.00242753	-1.99993	-1.21333	0.220374	0.842324	0.935575	0.644668
		16	1.0484	0.960139	2.45185	2.99734	1.18243	1.00011	3.5565	0.00242382	-2	-1.15788	0.524128	0.846168	0.931717	0.610096
		17	1.40837	0.923517	2.05397	2.99598	1.17985	1.00016	11.2786	0.00142569	-1.99987	-1.95459	-3.15281	0.798377	0.950018	0.67486
		18	1.27294	0.936754	2.16263	2.99592	1.16804	1.00017	8.8511	0.00144817	-1.99862	-1.20877	-1.21733	0.818463	0.945117	0.691613
		19	1.67181	0.95004	2.52829	0.808642	0.75329	1.00022	8.71109	0.00127929	-1.9898	-1.70217	-7.86036	0.751387	0.955133	0.711038
	4	20	1.64708	0.934225	2.14717	1.32363	0.852284	1.00068	10.877	0.00122199	-1.99994	-1.70322	-7.50425	0.747381	0.955002	0.667521
		21	1.41227	0.935125	2.27555	1.67608	0.961026	1.00069	10.8721	0.00127254	-1.99851	-1.70065	-3.09362	0.79634	0.950013	0.703188
		22	1.28943	0.936348	2.24409	2.35817	1.04401	1.00075	6.31498	0.00240096	-1.99847	-1.15702	-1.37999	0.817108	0.945041	0.707767
		23	1.11596	0.955115	2.42151	2.92187	1.15702	1.0006	4.27306	0.00211528	-1.99877	-1.11284	0.182311	0.841391	0.935629	0.65312
		24	1.18676	0.939157	2.28311	2.97001	1.12494	1.0006	5.79224	0.00199346	-1.9998	-1.23772	-0.400911	0.833242	0.940114	0.679891
		25	1.04816	0.962545	2.53339	2.98218	1.16637	1.00055	5.77503	0.00106854	-1.99879	-1.23677	0.534421	0.845419	0.930763	0.59995
	5	26	1.43056	0.936557	2.35163	1.387	0.900627	1	8.75926	0.00189528	-1.99962	-1.77285	-3.36624	0.796427	0.950014	0.704978
		27	1.68685	0.936529	2.39694	0.938843	0.881075	1	8.34725	0.00189536	-1.99992	-1.69807	-8.05808	0.747353	0.95521	0.675162
		28	1.17696	0.953788	2.30084	2.87992	1.15643	1	6.9897	0.00159955	-1.99946	-1.19	-0.27055	0.832784	0.940297	0.665187
		29	1.09568	0.954822	2.35063	2.99946	1.21573	1	5.56141	0.00159227	-1.9953	-1.19032	0.269955	0.8421	0.935739	0.633275
		30	1.0563	0.95379	2.44057	2.99999	1.23842	1	4.58322	0.00159188	-1.99606	-1.04216	0.50191	0.845621	0.932224	0.614541
		31	1.28996	0.937813	2.30586	2.07147	1.01862	1.00006	7.05302	0.0018987	-1.99944	-1.04709	-1.34311	0.816697	0.945084	0.713501
	6	32	1.17529	0.948631	2.28084	2.9682	1.08865	1.00004	7.10761	0.00157167	-1.94473	-1.40582	-0.330344	0.832798	0.940301	0.663305
		33	1.04723	0.956166	2.47083	2.97648	1.13248	1.00004	4.6219	0.00157085	-1.94468	-1.30868	0.507066	0.845703	0.931474	0.605704
		34	1.27494	0.938422	2.19282	2.96812	1.06907	1.00019	8.96528	0.00158797	-1.9448	-1.19443	-1.2288	0.818249	0.945004	0.682669
		35	1.67681	0.923908	2.08691	1.50344	1.0637	1.00024	8.98348	0.00103635	-1.94464	-1.95209	-8.21168	0.74243	0.955015	0.709438
		36	1.09564	0.948522	2.36291	2.9548	1.08868	1.00019	5.94812	0.00157053	-1.94538	-1.40288	0.21821	0.841676	0.935364	0.631316
		37	1.41421	0.939372	2.24254	1.76412	0.982634	1.00026	9.68902	0.00153642	-1.93418	-1.56585	-3.0565	0.796058	0.950084	0.702813
	7	38	1.10116	0.945238	2.37441	3	1.13426	1.0001	6.04687	0.00151731	-1.95597	-1.60262	0.163378	0.841888	0.935333	0.628888
		39	1.40902	0.939073	2.24379	1.76452	0.950465	1.00042	11.0207	0.00155966	-1.95514	-1.60701	-2.98049	0.796613	0.950057	0.677873
		40	1.18211	0.943597	2.27357	2.99983	1.12523	1.0004	7.3384	0.00155993	-1.95513	-1.04754	-0.315771	0.832433	0.940485	0.670331
		41	1.72722	0.9387	2.51143	0.802513	0.606332	1.00045	6.23842	0.00154009	-1.95348	-1.99776	-9.52507	0.745534	0.955012	0.710843
		42	1.27346	0.945243	2.31199	2.06824	0.986288	1.00032	9.1686	0.0015137	-1.95537	-1.02981	-1.14135	0.816818	0.945026	0.691547
		43	1.04977	0.959761	2.48105	2.99886	1.22561	1.00029	1.605	0.00155208	-1.95539	-1.02329	0.527046	0.84564	0.931267	0.645676
	8	44	1.09553	0.955282	2.36761	2.99997	1.27502	1.00013	6.40407	0.00122622	-1.99969	-1.18333	0.285476	0.841787	0.935796	0.630151
		45	1.04682	0.960122	2.42907	3	1.26374	1.00067	4.57221	0.00121367	-1.99924	-1.18293	0.523071	0.845501	0.932228	0.611768
		46	1.27054	0.94045	2.28842	2.19505	1.09235	1.0001	10.8314	0.00101218	-1.99906	-1.17434	-1.14954	0.816783	0.945001	0.696586
		47	1.67801	0.938757	2.31299	1.00589	0.936422	1.00001	7.03197	0.0012153	-1.99903	-1.7253	-8.05374	0.748921	0.955168	0.738766
		48	1.16899	0.947977	2.288	2.94314	1.11466	1.00096	8.29132	0.00123656	-1.99907	-1.17252	-0.238193	0.833054	0.940148	0.663065
		49	1.40617	0.938963	2.27289	1.70397	0.940862	1.00011	11.6478	0.00121616	-1.99911	-1.72493	-3.00757	0.796212	0.950014	0.694956
TS	1	1	1.11575	0.885061	2.90663	2.86962	0.652509	1.01715	1.0109	0.0954595	-1.96346	-0.76932	0.189068	0.839823	0.894053	0.744301
		2	1.20514	0.885011	2.96232	2.74743	0.640402	1.02091	1.0081	0.00100031	-1.99701	-0.760069	-0.465533	0.834464	0.88746	0.766167
		3	1.3017	0.885009	2.9999	0.903444	0.649196	1.00049	1.00093	0.00101594	-1.98609	-0.736302	-1.72686	0.815585	0.916184	0.856601
		4	1.38504	0.885048	1.01998	0.304152	2.99968	1.00128	1.00848	0.00157162	-1.97864	-0.393267	-3.70711	0.769974	0.369889	0.909906
		5	1.1892	0.885018	2.99983	1.17453	0.6189	1.00009	1.00976	0.0990386	-1.99413	-0.939369	-0.520643	0.823321	0.908778	0.824369
		6	1.34457	0.885037	2.99857	0.647264	0.83054	1.00012	1.00041	0.0010036	-1.99323	-1.20348	-2.52374	0.809315	0.895439	0.876716
		7	1.29664	0.885127	2.99894	1.13266	0.618649	1.01012	1.00074	0.00100041	-1.99919	-0.955412	-1.6022	0.818886	0.918517	0.841783
		8	1.18881	0.885021	2.94061	2.13455	0.622587	1.00697	1.00008	0.098516	-1.99983	-0.947714	-0.377257	0.830796	0.901446	0.785581
		9	1.41402	0.885221	0.667491	0.3	3	1.0025	1	0.001	-1.98301	-0.274209	-4.47355	0.764633	0.235251	0.915826
		10	1.04216	0.885024	2.92134	2.9185	0.643254	1.00683	1.21175	0.0859684	-1.7761	-0.760848	0.57588	0.84629	0.891015	0.704385
		11	1.36142	0.885038	2.99896	0.307346	1.39781	1.0004	1.00032	0.00106936	-1.99928	-0.933772	-3.29303	0.781379	0.669217	0.90491
		12	1.35506	0.885	2.99926	0.58124	0.76402	1.0002	1.00153	0.00100793	-1.99617	-1.2494	-2.83995	0.803996	0.881156	0.884606
		13	1.35758	0.88581	2.98007	0.506622	0.890476	1.0001	1.01027	0.00101704	-1.99659	-1.17068	-2.93455	0.800528	0.852801	0.889789
		14	1.20512	0.885014	2.99989	1.35561	0.634477	1.02123	1.00823	0.00100031	-2	-0.934352	-0.621682	0.827565	0.912451	0.802516
		15	1.34458	0.88504	2.99856	0.774807	0.768709	1.00012	1.00036	0.00100016	-1.99423	-1.32311	-2.42518	0.812771	0.913191	0.867054
		16	1.42148	0.885038	2.99705	0.379985	1.36476	1.0009	1.00989	0.00100051	-1.99324	-1.05434	-3.83696	0.789117	0.788545	0.900453
	2	17	1.42718	0.885005	2.99982	0.745611	0.747064	1.00007	1.00026	0.00100069	-1.99973	-1.83431	-3.75627	0.807846	0.920013	0.87503
		18	1.21977	0.885016	2.95532	2.81113	0.6647	1.01123	1.00178	0.0010071	-1.98294	-1.0713	-0.639262	0.83556	0.886386	0.768048
		19	1.42711	0.885022	2.99712	0.32493	1.39111	1.00013	1.00025	0.001002	-1.99939	-1.14963	-4.19987	0.782832	0.727558	0.904927
		20	1.33469	0.885006	2.9997	1.01695	0.592701	1.0001	1.00026	0.00100058	-1.99755	-0.837743	-2.09062	0.814136	0.920666	0.856261
		21	1.34024	0.885003	2.99997	0.782368	0.738527	1.00012	1.00181	0.00100866	-1.9996	-1.34425	-2.38992	0.813026	0.913281	0.8664
		22	1.42604	0.885022	2.99992	0.451514	1.24147	1.00013	1.00026	0.00100703	-1.99947	-1.14952	-3.75698	0.795747	0.84463	0.895239
		23	1.2221	0.88501	2.99855	1.11579	0.718226	1.05079	1.00026	0.00100092	-1.99741	-0.805464	-0.782658	0.82518	0.914017	0.822408
		24	1.40691	0.885015	2.99973	0.552776	0.758199	1.00002	1.00178	0.0010071	-1.99996	-1.14881	-3.58677	0.799664	0.88425	0.889865
		25	1.42649	0.885006	3	0.392358	1.29049	1.00012	1.00021	0.00100904	-1.99918	-1.1036	-3.92949	0.790839	0.801926	0.89999
		26	1.42756	0.885001	0.699942	0.306172	2.99794	1.00021	1.00027	0.00100732	-1.97857	-0.713696	-4.79755	0.765805	0.266102	0.915708
		27	1.22723	0.885006	2.99238	1.96913	0.584275	1.00014	1.00194	0.00100582	-1.99937	-1.1657	-0.787974	0.830374	0.899934	0.786036
		28	1.42658	0.885003	2.99506	0.626293	0.769188	1.00015	1.00195	0.00100745	-1.99999	-1.20615	-3.72446	0.803535	0.90577	0.88501
		29	1.26091	0.885007	2.99932	1.70919	0.603584	1.00015	1.00012	0.00100213	-1.99947	-1.15281	-1.12428	0.827103	0.905145	0.805255
		30	1.2658	0.88501	2.99934	1.03948	0.591295	1.00545	1.00003	0.00100081	-1.99773	-0.817285	-1.31104	0.818313	0.916515	0.84178
		31	1.10456	0.885001	2.88064	2.56271	0.743789	1.16756	1.00019	0.00104066	-1.99999	-0.838508	0.227962	0.841166	0.899994	0.733181
	3	32	1.11496	0.885012	2.60417	2.59725	0.799002	1.00299	1	0.0999013	-1.90968	-0.689744	0.117727	0.840151	0.913672	0.757053
		33	1.18263	0.885067	2.95746	1.55626	0.657124	1.00004	1	0.1	-1.81364	-0.799189	-0.330286	0.830258	0.909239	0.801594
		34	1.23694	0.885056	2.99985	0.482616	0.883002	1.00005	1.00003	0.0999193	-1.99983	-0.672144	-1.42765	0.797186	0.783987	0.886708
		35	1.28737	0.885027	1.06069	0.300835	2.99955	1.00001	1.00005	0.0999195	-1.99813	-0.193904	-2.32018	0.770631	0.303781	0.905542
		36	1.08579	0.885016	2.59803	2.84008	0.890894	1.00601	1.00351	0.099974	-1.96665	-0.794732	0.293895	0.84502	0.911166	0.735314
		37	1.23679	0.885004	2.99991	0.521331	0.8878	1.00007	1.00063	0.0984952	-1.99978	-0.654247	-1.33589	0.801464	0.8086	0.882569
		38	1.18236	0.885011	2.99121	1.0296	0.818553	1.00006	1.00058	0.0998165	-1.96758	-0.808104	-0.4219	0.825034	0.903341	0.826297
		39	1.2369	0.885025	2.99984	0.339141	0.99775	1.00005	1.00002	0.0999061	-1.99911	-0.688443	-1.79689	0.776061	0.632208	0.900039
		40	1.23675	0.885028	2.99999	0.582191	0.886534	1.00007	1.00006	0.0999217	-1.99939	-0.623928	-1.22002	0.806444	0.838476	0.876518
		41	1.18236	0.885016	2.9952	0.810125	0.858581	1.00007	1.00002	0.0999058	-1.99947	-0.688458	-0.516843	0.820313	0.88232	0.845199
		42	1.23686	0.88509	2.99999	0.777463	0.859811	1.00007	1.00004	0.099972	-1.99977	-0.615729	-0.990505	0.815423	0.890057	0.858415
		43	1.23681	0.885172	2.99992	0.641455	0.887107	1.00002	1.0005	0.0999286	-1.99982	-0.610432	-1.12877	0.810124	0.859972	0.870625
		44	1.21693	0.886247	0.51862	0.325469	1.30634	1.00003	1.00005	0.00549662	-1.99876	-0.761192	-2.89768	0.652666	0.0696272	0.915654
		45	1.28732	0.885061	0.742458	0.300591	2.99921	1.00001	1.00002	0.0999191	-1.99611	-0.320472	-2.59822	0.765537	0.182335	0.910295
		46	1.18253	0.885091	2.61283	2.91981	0.830105	1.0002	1.00001	0.0999188	-1.9391	-0.806537	-0.361472	0.835391	0.91549	0.778275
		47	1.2373	0.885018	2.99996	0.376044	1.12587	1	1.00003	0.0998413	-1.99639	-0.689169	-1.59497	0.786443	0.683743	0.895265
		48	1.23682	0.885214	2.99987	0.424675	1.03344	1	1.00003	0.0998413	-1.99929	-0.624475	-1.47691	0.792411	0.736614	0.891005
	4	49	1.25074	0.885	2.89314	3	0.66018	1.00193	1	0.001	-1.71042	-0.888173	-0.90038	0.835219	0.888777	0.7822
		50	1.25589	0.885084	2.90338	1.75116	0.740972	1.00002	1.00218	0.00100633	-1.99355	-1.0546	-1.03608	0.83003	0.911255	0.800914
		51	1.21697	0.885117	2.97772	2.94828	0.726148	1.00011	1.00494	0.00100289	-1.74966	-1.03274	-0.546026	0.840136	0.881604	0.760662
		52	1.33784	0.885063	3	0.693683	0.826641	1	1	0.001	-2	-0.872419	-2.2841	0.811178	0.902562	0.873382
		53	1.09677	0.885073	2.75713	2.98777	0.727817	1.04331	1.00079	0.0992227	-1.74136	-1.0602	0.237864	0.845148	0.903439	0.736335
		54	1.42809	0.885137	0.630626	0.311581	3	1.00009	1.00279	0.00108944	-1.99983	-0.770126	-4.90654	0.765124	0.236908	0.916239
		55	1.35512	0.885077	2.99832	0.601521	0.874366	1.00007	1.00646	0.00100379	-1.99954	-0.887578	-2.61791	0.806719	0.886909	0.882216
		56	1.28935	0.885001	2.99905	0.725874	0.836607	1.00011	1.00289	0.00102341	-1.98904	-0.87273	-1.68222	0.815257	0.898679	0.861992
		57	1.40145	0.885061	2.99998	0.325515	1.28478	1.0001	1.00283	0.00100072	-1.99879	-0.859735	-3.8068	0.782271	0.716801	0.905378
		58	1.26408	0.885071	2.99805	0.847033	0.875288	1.00003	1.0001	0.00100283	-1.99173	-0.617807	-1.22196	0.820506	0.908141	0.845334
		59	1.41246	0.885077	2.99806	0.362959	1.26237	1.00007	1.0002	0.00100013	-1.99968	-0.886886	-3.80648	0.787395	0.767716	0.902603
		60	1.00176	0.885002	2.75712	2.98783	0.739967	1.04069	1.00473	0.0919812	-1.72322	-1.04438	0.668999	0.850045	0.897065	0.681802
		61	1.26269	0.885002	2.973	1.25703	0.711155	1.00003	1.00279	0.00101016	-1.7603	-0.848001	-1.11479	0.825395	0.916784	0.823406
		62	1.40478	0.885493	2.99869	0.531121	0.919546	1	1.00255	0.00100011	-1.99892	-1.08654	-3.45504	0.800894	0.876589	0.890482
		63	1.41601	0.88506	2.9977	0.446675	1.15136	1.00001	1.00242	0.00100624	-1.99882	-1.08802	-3.67931	0.795669	0.838527	0.896031
	5	64	1.25019	0.885017	2.9205	2.73849	0.780173	1.00563	1.01559	0.00100303	-1.90419	-0.673262	-0.801374	0.835006	0.889947	0.780006
		65	1.24785	0.885006	2.99981	0.800175	0.848948	1.00265	1.00012	0.00100004	-1.96879	-0.624597	-1.11739	0.820044	0.900908	0.84629
		66	1.01548	0.885016	2.61684	2.95412	1.05891	1.09179	1.00537	0.00100259	-1.97001	-1.33989	0.565895	0.85011	0.906585	0.652569
		67	1.15795	0.885017	2.87092	2.63692	0.741316	1.12602	1.001	0.00100304	-1.61275	-0.621862	-0.0541561	0.840024	0.899592	0.756348
		68	1.25089	0.885012	2.99865	1.10413	0.77531	1.00878	1.00096	0.00100008	-1.90476	-0.698766	-0.996337	0.825016	0.916011	0.826782
		69	1.18402	0.885005	2.97501	1.13068	0.871719	1.01482	1.00033	0.00100012	-1.84557	-0.610712	-0.364657	0.830003	0.910966	0.798332
		70	1.42579	0.885	2.9985	0.392013	1.22872	1.0008	1.00186	0.00100572	-1.99806	-0.861415	-3.88926	0.790529	0.801272	0.900507
		71	1.33771	0.885006	2.99979	0.579129	0.863806	1.0008	1.00135	0.00100334	-1.99874	-0.864719	-2.44472	0.806518	0.876283	0.882606
		72	1.4285	0.885001	2.99867	0.463186	1.06874	1	1.00028	0.00100002	-2	-1.16784	-3.89629	0.796824	0.851961	0.895328
		73	1.43075	0.885071	0.704294	0.313107	2.99989	1.0008	1.00187	0.00100961	-1.98744	-0.609725	-4.78812	0.766064	0.278554	0.915535
		74	1.42588	0.885001	2.99991	0.53433	0.964247	1	1.00481	0.00100001	-1.99999	-0.868001	-3.64343	0.800851	0.882417	0.890775
		75	1.34006	0.885052	2.99991	0.664289	0.848373	1.00002	1.00098	0.00100001	-1.99306	-0.857299	-2.33375	0.810198	0.897924	0.875701
		76	1.42612	0.885027	2.99854	0.325601	1.45168	1.0008	1.00185	0.00100572	-1.99997	-0.706428	-3.98561	0.782872	0.72808	0.905127
		77	1.29988	0.885031	2.99846	0.729484	0.920059	1.00925	1.00016	0.00100011	-1.99807	-0.61882	-1.67946	0.815025	0.901127	0.862719
		78	1.09853	0.885001	2.71379	3	0.859354	1.21158	1.00399	0.00100956	-1.84551	-0.860599	0.248213	0.845085	0.907483	0.731876
	6	79	1.00875	0.885003	2.83646	2.99717	0.823348	1.04259	1.0459	0.0846086	-1.73378	-0.889788	0.688846	0.850627	0.893946	0.678587
		80	1.22253	0.885014	2.83776	1.61943	0.797183	1.04443	1.04387	0.0010019	-1.99846	-0.750656	-0.689653	0.830373	0.916914	0.798824
		81	1.2275	0.885001	2.71151	2.83684	0.822304	1.04314	1.04463	0.00100523	-1.9711	-0.889732	-0.745553	0.835001	0.910219	0.780871
		82	1.22437	0.885	2.9901	0.943927	0.89739	1.01716	1.04509	0.00100002	-1.98048	-0.545974	-0.760866	0.825006	0.909017	0.825971
		83	1.33769	0.885003	2.99991	0.558647	0.895683	1.00056	1.04099	0.00100012	-1.99998	-0.934396	-2.48054	0.805917	0.869396	0.883197
		84	1.36297	0.885022	2.99986	0.450888	0.91388	1.00008	1.04257	0.0010001	-1.99977	-0.759825	-3.01628	0.795174	0.823831	0.895105
		85	1.32689	0.885009	2.9993	0.801419	0.872882	1.00117	1.03991	0.00101418	-1.99996	-0.51868	-1.90299	0.81505	0.913125	0.862164
		86	1.09498	0.885027	2.7464	2.99427	0.731003	1.20151	1.03954	0.00101299	-1.73274	-0.923151	0.248464	0.845208	0.905241	0.73206
		87	1.36376	0.885011	2.99955	0.320238	1.07715	1.00034	1.04267	0.00101227	-1.99914	-1.01291	-3.51063	0.778482	0.690821	0.905352
		88	1.3432	0.885003	2.99962	0.655368	0.89613	1.00055	1.04041	0.00100419	-1.99843	-0.759825	-2.32538	0.810061	0.896812	0.875632
		89	1.18764	0.885507	2.85657	2.8452	0.683431	1.04142	1.04028	0.00100012	-1.59931	-0.950843	-0.35582	0.840087	0.897608	0.760586
		90	1.40384	0.885022	0.634341	0.430937	2.98141	1	1.05111	0.00112358	-1.99669	-0.764365	-4.33002	0.765879	0.336907	0.912674
		91	1.36566	0.885031	2.99937	0.390773	0.916862	1.0004	1.0408	0.00101231	-1.99845	-0.924048	-3.31092	0.787401	0.776768	0.900343
		92	1.42736	0.885001	2.99937	0.525551	0.910336	1.00113	1.04076	0.00100723	-1.99995	-0.946441	-3.75352	0.800111	0.879709	0.890908
		93	1.26859	0.885453	2.99899	0.836079	0.897337	1.00134	1.05048	0.00100436	-1.99869	-0.54985	-1.24557	0.820076	0.908133	0.846342
		94	1.40468	0.885021	0.521887	0.429781	2.98141	1.00008	1.05254	0.00112358	-1.99669	-0.513898	-4.43331	0.762588	0.260785	0.915048
	7	95	1.25547	0.885766	2.99249	0.801364	0.923767	1.00779	1.00107	0.00103983	-1.99996	-0.482252	-1.12342	0.820028	0.902599	0.846279
		96	1.35504	0.885375	2.99821	0.399049	1.17283	1.00001	1.00078	0.00100319	-1.99981	-0.652202	-2.87158	0.793006	0.780128	0.897499
		97	1.35504	0.885376	2.99836	0.479292	1.06069	1.00001	1.00052	0.00101273	-1.9997	-0.652202	-2.69577	0.800058	0.838503	0.890875
		98	1.22012	0.885023	2.99412	1.05201	0.808831	1.06246	1.00108	0.00104348	-1.78303	-0.491055	-0.669418	0.82531	0.912696	0.824315
		99	1.43193	0.885296	0.989759	0.349848	2.99997	1.00016	1.00004	0.00101265	-1.99937	-0.496753	-4.35868	0.77011	0.439164	0.91102
		100	1.18245	0.885146	2.9375	2.53451	0.774956	1.03534	1.00428	0.00104277	-1.692	-0.565859	-0.195757	0.840029	0.894635	0.755741
		101	1.43214	0.885028	0.747775	0.3	2.99999	1	1.01023	0.00101284	-1.99901	-0.380705	-4.70492	0.766457	0.282934	0.915202
		102	1.35476	0.885028	2.99991	0.705475	0.903781	1.00006	1.01107	0.00104815	-1.9997	-0.647421	-2.35873	0.810636	0.90699	0.873225
		103	1.40263	0.88525	2.99929	0.367508	1.07337	1.00007	1.00117	0.00109876	-1.99974	-1.15414	-3.87752	0.786678	0.768726	0.902328
		104	1.05736	0.885054	2.89939	2.6023	0.655147	1.09649	1.0094	0.0879156	-1.60886	-0.515434	0.536933	0.845019	0.895889	0.728301
		105	1.35473	0.88515	2.99997	0.59132	0.924537	1.00002	1.00096	0.00103967	-1.99996	-0.651406	-2.52981	0.806385	0.884085	0.88249
		106	1.35666	0.885137	2.99587	0.316342	1.0851	1.00001	1.0016	0.00109879	-1.99185	-1.11047	-3.46155	0.77796	0.680889	0.905849
		107	1.2879	0.885006	2.99961	0.759885	0.816592	1.03507	1.00109	0.00101333	-1.99685	-0.569634	-1.56135	0.815007	0.903117	0.861889
		108	1.22012	0.885023	2.99413	1.50924	0.679785	1.03677	1.00071	0.00103937	-1.79458	-0.565425	-0.604857	0.83007	0.910565	0.801827
		109	1.23659	0.885011	2.99464	2.56392	0.668431	1.03638	1.00418	0.00110009	-1.71232	-0.653084	-0.663491	0.835209	0.885699	0.780024
	8	110	1.23271	0.885313	2.79496	2.94153	0.669258	1.00124	1.00064	0.00100001	-1.63907	-0.770719	-0.760357	0.835191	0.901155	0.780152
		111	1.25525	0.885001	2.7986	1.90257	0.795755	1.00002	1.00087	0.001	-1.98861	-1.03332	-1.04711	0.830361	0.915585	0.798819
		112	1.42391	0.885025	2.99879	0.634013	0.881655	1.00008	1.00084	0.001	-1.99997	-1.17933	-3.56507	0.805327	0.906808	0.883774
		113	1.30929	0.885021	2.9992	0.632641	0.895253	1.0004	1.00098	0.00100007	-1.99041	-0.652032	-1.93862	0.810659	0.884473	0.873358
		114	1.42327	0.885021	2.99884	0.32757	1.26683	1.00039	1.00035	0.00102687	-1.9956	-1.0643	-4.19517	0.782529	0.729568	0.905034
		115	1.42331	0.885033	2.99665	0.458822	1.02231	1.00002	1.00035	0.00100001	-1.99561	-1.18758	-3.8793	0.796282	0.847926	0.895736
		116	1.09499	0.885	2.88607	2.63792	0.654898	1.00167	1.03629	0.0883376	-1.63675	-1.0988	0.27004	0.845311	0.897828	0.732653
		117	1.42434	0.885297	2.99895	0.390247	1.20036	1.00001	1.00024	0.001	-1.99549	-0.953397	-3.92731	0.790442	0.79939	0.900705
		118	1.42662	0.885389	0.762542	0.30095	3	1.00037	1.00096	0.00100034	-1.99492	-0.625187	-4.68849	0.766672	0.288406	0.915259
		119	1.12056	0.885324	2.79528	2.62644	0.665616	1.00131	1.00103	0.0964142	-1.66139	-0.688798	0.144958	0.840709	0.904594	0.753806
		120	1.32786	0.885211	2.99661	0.865131	0.729971	1.00038	1.00035	0.001	-1.99474	-0.953975	-2.06102	0.81505	0.917282	0.860803
		121	1.25609	0.88503	2.9973	1.22688	0.705661	1.00007	1.00098	0.00100009	-1.98401	-0.787814	-1.06066	0.825568	0.915973	0.822844
		122	1.25465	0.885305	2.99669	0.847241	0.807576	1.00588	1.00033	0.00100022	-1.99389	-0.733847	-1.19114	0.820015	0.906862	0.845393
		123	1.42377	0.885034	2.99647	0.568733	0.881655	1.00003	1.00084	0.001	-1.99997	-1.16151	-3.69331	0.802601	0.892416	0.888415
ES	1	1	1.92591	0.953341	2.5682	0.638352	2.99435	1.0001	1.00011	0.00104321	-1.99971	-1.98754	-12.0237	0.591572	0.955002	0.853435
		2	1.49216	1.10468	0.791406	0.512363	2.90659	1.00009	1	0.00100394	-1.99629	-0.946203	-4.95126	0.758217	0.565716	0.909327
		3	1.66514	0.984471	2.98317	0.445534	2.98976	1.00002	1.00004	0.00100617	-1.99664	-0.899568	-6.01301	0.674975	0.923872	0.894202
		4	1.65606	1.00974	2.98563	0.370529	2.99094	1.00008	1.00001	0.00100084	-1.99722	-0.9074	-6.12969	0.6842	0.8861	0.899225
		5	1.59849	1.06924	2.98036	0.313651	2.89489	1.00002	1.00002	0.00104068	-1.99663	-0.767724	-5.38193	0.709744	0.820584	0.904454
		6	1.69687	0.984378	2.99474	0.512335	2.98765	1.00009	1.00011	0.00100076	-1.99734	-0.917221	-6.33578	0.656818	0.943494	0.889354
		7	1.70051	0.984471	2.9943	0.551284	2.99435	1.00002	1	0.00101462	-1.99663	-0.946246	-6.29663	0.651104	0.947793	0.886909
		8	1.73288	0.962695	2.78876	0.638348	2.98767	1.00008	1.00004	0.00100088	-1.99726	-1.22201	-7.09727	0.643534	0.951682	0.881119
	2	9	1.66491	0.984309	2.99998	0.444755	2.98064	1.00001	1.00002	0.00100052	-1.99644	-0.996554	-6.04761	0.674907	0.924274	0.894028
		10	1.88949	0.941103	2.40111	0.790423	2.98168	1.00001	1.00008	0.00100084	-1.99508	-1.24297	-10.8305	0.607471	0.955052	0.855342
		11	1.64609	1.00715	2.99912	0.372559	2.9808	1.00005	1.00063	0.00100544	-1.98825	-0.973232	-5.97981	0.686932	0.886037	0.89914
		12	1.73369	0.97701	2.99986	0.566704	2.98041	1.00002	1.00008	0.00100014	-1.99498	-1.22387	-7.01542	0.637935	0.95005	0.884348
		13	1.60186	1.03274	2.99999	0.310503	2.88007	1.00002	1.00002	0.00100739	-1.99402	-0.845502	-5.56313	0.7115	0.820942	0.90446
		14	1.45908	1.14801	0.563428	0.430234	2.97986	1.00028	1.0002	0.00100069	-1.99911	-0.718509	-4.67184	0.758601	0.417106	0.914611
		15	1.70548	0.984312	2.99985	0.503003	2.98182	1.00001	1	0.00100008	-1.99632	-0.98811	-6.54991	0.654932	0.942899	0.889484
		16	1.5731	1.24195	1.43117	0.305672	2.98173	1.00027	1.00001	0.00100024	-1.99641	-0.936857	-5.74662	0.741757	0.607127	0.909282
	3	17	1.45563	1.09167	2.97157	0.335276	1.43608	1	1.00003	0.0010012	-1.99917	-0.770315	-4.01728	0.754177	0.794307	0.905006
		18	1.77233	0.956048	2.5966	0.699879	2.99917	1	5.45986	0.00100005	-1.99999	-0.567376	-7.47042	0.631206	0.955004	0.811371
		19	1.66454	0.996597	2.99898	0.43911	2.99894	1	1	0.0010001	-1.99989	-0.564856	-5.83244	0.6741	0.922396	0.895004
		20	1.73879	0.97738	2.99849	0.562337	2.99932	1.00005	1	0.00100013	-1.99917	-0.769974	-6.90012	0.636869	0.950044	0.885085
		21	1.69836	0.981208	2.99968	0.506544	2.99911	1.00001	1.00003	0.0010006	-2	-0.569476	-6.22602	0.657238	0.942827	0.890008
		22	1.66454	0.997367	2.99901	0.35635	2.99909	1	1	0.00100061	-1.9999	-0.569219	-6.22488	0.684886	0.878608	0.90001
		23	1.45563	1.12026	0.759291	0.43992	2.02698	1	1.00003	0.0010012	-1.99918	-1.4286	-5.21927	0.722958	0.510805	0.910247
	4	24	1.97996	1.13071	0.734358	2.8499	0.88915	1.40935	2.83258	0.00644409	1.94249	-0.709395	-16.5395	-5.7634	0.71718	-0.309895
		25	1.70485	0.946576	2.42916	0.866214	2.99985	1.00003	7.18507	0.00100042	-1.99636	-0.531852	-6.21748	0.656433	0.955011	0.797122
		26	1.61523	1.0472	2.99998	0.303929	2.97741	1.00004	1	0.00100004	-1.99997	-0.567175	-5.62267	0.704957	0.817725	0.90503
		27	1.67442	0.994806	2.9996	0.43418	2.99958	1.00004	1	0.001	-1.99997	-0.532755	-6.01168	0.672067	0.922134	0.895029
		28	1.70438	0.977769	2.99979	0.552641	2.99935	1.00006	1.00001	0.00100001	-1.99823	-0.537937	-6.19641	0.650899	0.948172	0.887179
		29	1.75282	0.975621	2.98106	0.575561	2.99925	1.00001	1.00002	0.001	-1.99848	-0.641675	-7.09324	0.631671	0.95081	0.883552
		30	1.62348	1.02279	2.99995	0.373294	2.96656	1.00001	1.00004	0.001	-1.99822	-0.539256	-5.39002	0.694596	0.881072	0.900001
		31	1.6945	0.983766	2.99986	0.507792	2.99939	1.00005	1	0.001	-1.99826	-0.543342	-6.13449	0.658333	0.942743	0.890051
	5	32	1.69353	0.975595	3	0.4995	2.92886	1.00023	1.00001	0.00100001	-1.99625	-0.782377	-6.31897	0.664291	0.941107	0.890296
		33	1.71234	0.937099	2.24043	1.10358	2.84499	1	6.88446	0.00101001	-1.99268	-0.699557	-6.68433	0.670042	0.955066	0.78995
		34	1.45699	1.12056	1.79122	0.3	2.13864	1.00002	1.00003	0.0010091	-1.98631	-0.795071	-4.36848	0.744261	0.642783	0.910052
		35	1.39106	1.1998	0.872267	0.307789	1.78705	1.00023	1.00007	0.00100168	-1.90671	-0.913529	-4.18359	0.701604	0.429325	0.915046
		36	1.71863	0.971064	2.90405	0.615696	2.95148	1.00012	1.00003	0.00100012	-1.99122	-0.601872	-6.47232	0.647523	0.950922	0.883311
		37	1.65094	1.00732	2.9992	0.43421	2.92805	1.00022	1	0.00100003	-1.99586	-0.772939	-5.72381	0.680662	0.91819	0.895285
		38	1.61935	1.00779	2.99882	0.36628	2.83688	1.00001	1.00043	0.0010329	-1.95162	-0.793658	-5.56936	0.702853	0.875451	0.90021
		39	1.69428	0.973175	2.99941	0.555195	2.95339	1	1.0001	0.00102684	-1.99617	-0.80231	-6.17138	0.657477	0.947766	0.887066
		40	1.59322	1.05358	2.99853	0.304777	2.84728	1.0002	1	0.001	-1.99985	-0.868647	-5.45113	0.714388	0.811734	0.905012
	6	41	1.68084	1.0151	3	0.425664	2.99255	1.00001	1.00002	0.00100076	-1.98514	-0.799955	-6.21776	0.668419	0.919043	0.895155
		42	1.49748	1.08519	3	0.322776	1.7607	1.00005	1.00049	0.00100006	-1.98898	-0.746014	-4.45504	0.748506	0.798377	0.905301
		43	1.61715	0.977163	2.99997	0.371233	2.82861	1.00001	1.00002	0.00101192	-1.99994	-0.758557	-5.58289	0.706817	0.876188	0.900062
		44	1.71477	0.977055	2.99907	0.541775	2.99894	1.00012	1.0001	0.00101081	-1.99975	-0.753493	-6.50945	0.647777	0.947862	0.887312
		45	1.81684	0.956851	2.54493	0.692924	2.9949	1.00035	4.3185	0.00100179	-1.999	-0.733634	-8.54644	0.62078	0.955056	0.815189
		46	1.69114	0.972734	3	0.50914	3	1.00007	1	0.00100108	-1.99772	-0.621609	-6.13993	0.660835	0.942331	0.890078
		47	1.745	0.974161	2.9849	0.582699	2.99995	1.00011	1.0001	0.00100998	-1.98806	-0.75236	-6.97792	0.633531	0.950745	0.883664
		48	1.4752	1.15942	1.09976	0.365212	2.69685	1.00028	1.00001	0.00102236	-2	-0.801537	-4.52705	0.752655	0.574514	0.910191
	7	49	1.64819	1.50664	0.859821	0.510628	0.806138	1.55977	3.58583	0.0851762	-1.33241	-0.416937	-7.51835	0.5763	0.368511	-0.219123
		50	1.65252	0.982779	2.99671	0.505799	2.72621	1	1.00001	0.00100311	-1.99967	-0.741618	-5.68337	0.686722	0.938472	0.89071
		51	1.60122	1.01604	2.98459	0.304947	2.98713	1.00003	1.00122	0.00110043	-1.99993	-0.523019	-5.4372	0.710895	0.812493	0.905022
		52	1.71287	0.9826	2.99718	0.550949	2.96724	1	1.00001	0.00101743	-1.98922	-0.758234	-6.45441	0.648689	0.948417	0.886767
		53	1.7337	0.971076	2.87493	0.611784	2.99895	1	1	0.00100299	-1.99837	-0.749822	-6.82128	0.64034	0.951248	0.882977
		54	1.60915	1.00517	2.98474	0.372364	2.68635	1	1.00051	0.001	-1.97033	-0.752599	-5.4679	0.712696	0.876408	0.900076
		55	1.66374	0.967628	3	0.434486	3	1.00041	1.00086	0.001	-2	-0.752188	-5.99883	0.678327	0.918898	0.895135
	8	56	1.56763	1.03453	2.99999	0.312133	2.42463	1.00001	1	0.00100816	-1.99998	-0.695652	-5.22772	0.732936	0.812063	0.905013
		57	1.45814	1.12164	1.77897	0.302082	2.18339	1.0001	1.00012	0.0010097	-1.99914	-0.63296	-4.29637	0.745343	0.643914	0.910064
		58	1.68085	0.973066	2.80113	0.659474	2.75975	1.00002	1	0.00100687	-1.99944	-0.663595	-5.96172	0.673512	0.950721	0.882146
		59	1.68137	0.978814	3	0.564229	2.92783	1.00002	1.00003	0.00102026	-1.99976	-0.60761	-5.83736	0.662098	0.947853	0.886938
		60	1.67974	0.988916	2.99975	0.511278	2.99217	1.00009	1.00003	0.00100223	-1.99983	-0.632708	-5.89584	0.662618	0.941994	0.890156
		61	1.65392	0.988916	2.99999	0.440106	2.99282	1.00001	1.00001	0.00101864	-1.99983	-0.632708	-5.70275	0.678254	0.921109	0.895055
		62	1.60863	1.00252	3	0.37429	2.5929	1	1	0.001	-2	-0.608163	-5.45389	0.716799	0.878481	0.900053
		63	1.42351	1.20743	0.90812	0.302453	2.1828	1.00002	1.00005	0.00100809	-1.99943	-0.698236	-4.31879	0.728226	0.447034	0.915015
QTE	1	1	0.951932	0.991278	2.98223	1.88736	0.770186	1.04908	4.34869	0.087593	-0.897669	1.72049	0.951039	0.805247	0.908954	0.643882
		2	0.92432	0.927904	2.58466	2.97594	1.46142	1.32523	1	0.0161761	-1.94835	-0.165247	0.912035	0.840703	0.908987	0.604092
		3	0.984334	0.989309	2.9139	1.89227	1.18055	1.18199	2.62314	0.0356273	-0.151171	1.8122	0.953569	0.783544	0.915286	0.626089
		4	0.976238	0.920721	2.96	2.99216	1.05576	1.12778	1.34482	0.00229887	-0.466645	-0.902093	0.866738	0.845289	0.899323	0.600973
		5	0.934126	0.980857	2.68969	2.95512	1.0372	1.63724	1.14857	0.00101979	-1.07316	0.420123	0.945503	0.83061	0.92105	0.661229
		6	1.43615	0.947132	2.13257	1.96439	1.20787	1.0289	11.5829	0.00169756	-1.97455	0.0571233	-2.7321	0.784748	0.95034	0.659705
		7	0.978928	0.981592	2.91458	1.90114	1.21007	1.05349	3.21729	0.046615	-0.145093	1.72143	0.952939	0.787254	0.913394	0.618511
		8	0.951337	0.921344	2.96008	2.99214	1.05576	1.12778	1.57954	0.00219919	-0.39916	-0.0924881	0.932522	0.840754	0.898758	0.599416
		9	1.03056	0.977627	2.44839	2.82742	2.55771	1.06223	4.67209	0.00105523	-1.9215	1.45645	0.882673	0.82092	0.930242	0.576453
		10	1.11587	0.981479	2.47215	2.32637	2.94405	1.00632	7.26369	0.00215583	-0.34926	1.50219	0.8013	0.772041	0.935026	0.498784
		11	1.29332	0.943976	2.16664	2.907	2.9403	1.62467	19.6284	0.00100195	-0.220608	1.93356	0.0741471	0.664927	0.944956	0.344345
		12	1.09446	0.979587	2.36883	2.66273	2.83241	1.08766	8.46703	0.001	-0.132101	0.484177	0.760486	0.795546	0.935083	0.567435
		13	0.951932	0.945683	2.98223	2.13498	0.770186	1.04908	4.34869	0.087593	-0.897669	1.72049	0.9524	0.810666	0.902968	0.642159
		14	0.920018	0.980054	2.70086	2.97299	1.08864	1.3679	1.35458	0.00114798	-1.96821	0.00245798	0.931672	0.832305	0.920295	0.614768
		15	1.41855	0.946542	2.18659	1.97201	1.48796	1.1046	12.1151	0.0010726	-1.95193	0.0644428	-2.35106	0.779498	0.950038	0.698834
		16	1.22374	0.965301	2.25846	2.99988	2.97789	1.84971	17.2628	0.00251775	0.220623	2	0.598532	0.592765	0.9402	0.0640379
		17	1.42563	0.946542	2.17251	1.97203	1.49166	1.04631	12.1151	0.00223868	-1.95193	0.00213474	-2.32268	0.775201	0.950013	0.612137
		18	1.17001	0.967421	2.40914	1.99135	2.69922	1.01413	19.359	0.00107766	-0.866556	0.402347	0.459757	0.760116	0.940035	0.474565
		19	0.954257	0.969642	2.70897	2.97311	1.17793	1.13168	1.16349	0.0014248	-1.97698	-1.46543	0.805452	0.844985	0.92175	0.570682
		20	1.18627	0.96502	2.48165	1.92506	1.85613	1.01179	7.79378	0.00235096	-1.98119	-0.0189656	0.127379	0.809985	0.940234	0.620906
		21	0.978544	0.978442	2.51038	2.9374	2.81328	1.35277	3.23729	0.00149312	-1.17533	1.44848	0.945314	0.809392	0.925596	0.571042
		22	0.947332	0.969433	2.71719	2.96794	1.21387	1.14773	1.8455	0.00257681	-1.92181	-0.219043	0.904343	0.840515	0.920786	0.57849
		23	1.11382	0.971937	2.47047	2.4687	2.94504	1.18231	18.4519	0.00100121	-0.403576	1.8646	0.842007	0.716918	0.935413	0.349546
		24	0.936579	0.99297	2.9633	2.95149	1.07771	1.31137	1.05741	0.0011193	-0.416946	0.245192	0.950307	0.830185	0.911739	0.617064
		25	1.09839	0.966031	2.3633	2.9449	2.8943	1.095	6.8703	0.00102166	-1.89128	1.65817	0.762972	0.806246	0.93503	0.594569
		26	1.03541	0.971926	2.50083	2.89791	1.65605	1.01636	4.30767	0.00103813	-1.98328	0.71724	0.792129	0.836674	0.930672	0.609134
		27	1.17835	0.960502	2.40665	2.05871	2.24163	1.15109	12.0843	0.00101146	-1.91525	1.33594	0.394216	0.793517	0.939932	0.610915
		28	1.28523	0.944854	2.23724	2.47152	1.74389	1.07681	7.19934	0.00215665	-1.61743	-0.552006	-0.849021	0.801656	0.945073	0.687741
		29	0.978544	0.978601	2.50604	2.97732	2.84058	1.35277	3.83875	0.00101791	-0.519506	1.42579	0.949379	0.796761	0.925467	0.548311
		30	0.965929	0.885725	2.96551	2.99626	1.0581	1.09674	1.36617	0.00311285	-0.149205	-0.221354	0.909872	0.845674	0.884695	0.609719
		31	1.03464	0.979052	2.47641	2.97996	2.83328	1.06932	7.22376	0.00108156	-1.01871	1.39719	0.909769	0.803939	0.930396	0.52501
		32	0.979139	0.917307	2.83552	2.93227	1.25973	1.09004	1.02571	0.0010057	-1.96096	-1.06863	0.784237	0.849312	0.906758	0.596498
		33	1.11587	0.982028	2.47215	2.35462	2.89148	1.18466	7.13003	0.00102531	-0.363098	1.50219	0.793929	0.776132	0.935163	0.566671
		34	1.17676	0.971095	2.40668	1.98009	2.43	1.03705	11.3072	0.00100288	-1.90897	0.498572	0.3077	0.800266	0.940208	0.619112
		35	0.917778	0.988195	2.70148	2.05891	1.07298	1.46226	1.10513	0.00108132	-1.0174	0.557778	0.951151	0.821682	0.915913	0.653197
		36	1.17676	0.966354	2.40668	2.02224	2.43	1.09734	11.3072	0.00100005	-0.180418	0.773488	0.457867	0.780484	0.939942	0.590829
		37	1.28385	0.94664	2.2323	2.46416	1.0675	1.00246	7.19934	0.00214818	-1.99644	-0.548346	-1.14263	0.816719	0.945159	0.699848
		38	1.0924	0.978656	2.36959	2.98331	2.76778	1.00121	8.37422	0.00100447	-1.93395	0.506752	0.682282	0.816902	0.9351	0.577694
		39	0.967742	0.988816	2.58909	2.97768	1.66751	1.61814	3.72642	0.001021	-1.94287	0.551837	0.923185	0.832762	0.925595	0.634143
		40	0.979139	0.98582	2.83606	2.93241	1.34475	1.02165	1.26661	0.0010057	-1.96096	-1.03764	0.823661	0.845549	0.918497	0.564013
		41	1.07962	0.966371	2.36959	2.97047	1.65369	1.18645	8.18501	0.00101777	-1.94259	-0.211856	0.564207	0.833465	0.935084	0.630712
		42	1.11382	0.971937	2.47126	2.4687	2.94504	1.18231	7.20839	0.00101059	-0.351875	1.8646	0.821799	0.764814	0.93499	0.548576
		43	1.2935	0.944392	2.16838	2.88777	2.94963	1.36542	18.7833	0.00105053	-0.217355	1.97102	0.0534496	0.683784	0.944903	0.390873
		44	1.28523	0.944854	2.20335	2.47146	1.75262	1.07681	7.19934	0.00101295	-1.61743	0.422295	-0.737632	0.799866	0.94522	0.722717
		45	1.09226	0.980266	2.40701	2.69566	1.24945	1.00013	8.38641	0.00103997	-1.93395	-1.08268	0.361393	0.837421	0.935598	0.612115
		46	0.991985	0.959329	2.58978	1.9997	1.8487	1.63033	12.1943	0.00227363	-0.331658	1.95282	0.954749	0.712608	0.920909	0.325593
		47	1.29349	0.943969	2.16664	2.90303	2.9403	1.06842	19.1016	0.00100195	-0.222886	1.50579	-0.0710163	0.720539	0.945188	0.453672
		48	1.03056	0.977627	2.44604	2.93384	2.56039	1.06125	4.35426	0.00103973	-0.249592	0.732632	0.89354	0.815248	0.930482	0.566859
		49	1.17676	0.971022	2.40668	2.02213	2.43	1.09819	11.3072	0.00100288	-0.180418	0.0178194	0.367732	0.786359	0.940243	0.60746
		50	1.03464	0.981458	2.47641	2.98034	2.84627	1.01843	4.12648	0.00105958	-1.01871	1.38396	0.904809	0.810839	0.93005	0.553557
		51	1.4343	0.940631	2.14601	1.90486	2.90599	1.03664	11.4341	0.00152182	-0.312261	0.048021	-1.73185	0.726085	0.9502	0.66219
		52	1.28331	0.947402	2.24991	2.45345	2.47903	1.06407	10.9279	0.00111942	-0.861981	0.242055	-0.39931	0.780418	0.945137	0.65744
		53	0.965929	0.885725	2.93416	2.99626	1.0581	1.09674	1.35766	0.00206942	-0.48205	-0.221354	0.898733	0.84603	0.886993	0.615925
		54	1.27915	0.946443	2.24954	2.45345	2.72499	1.05241	10.8826	0.00108332	-0.448873	-0.156618	-0.358201	0.773855	0.945033	0.651192
		55	1.43134	0.940631	2.14706	1.97715	2.88756	1.03672	11.4207	0.00190966	-0.307407	0.0106649	-1.67058	0.722483	0.950114	0.631552
		56	1.09289	0.969046	2.38038	2.66483	2.85628	1.33878	6.22892	0.00146677	-0.192046	0.507172	0.770882	0.79251	0.935101	0.603947
		57	1.11382	0.971937	2.47126	2.49337	2.94504	1.18231	8.85249	0.0010294	-0.250066	1.86624	0.830302	0.755581	0.935022	0.516623
		58	1.17001	0.967421	2.40914	2.04972	2.82541	1.01064	19.359	0.00100155	-0.866556	0.402347	0.469216	0.759812	0.940094	0.479865
		59	1.29175	0.943618	2.13836	2.88706	2.9403	1.03654	11.9662	0.00100195	-0.224663	1.50579	-0.137285	0.752169	0.944966	0.580882
		60	1.11731	0.959827	2.47231	2.47719	2.69561	1.62756	12.276	0.00212387	-0.322905	1.86967	0.848397	0.712003	0.934984	0.379369
		61	1.29358	0.944404	2.29201	1.98067	2.95025	1.17043	11.5501	0.0022031	-0.403604	0.790101	-0.143973	0.730527	0.945123	0.548902
		62	0.970099	0.987375	2.59781	2.93062	1.56738	1.3198	3.72787	0.00107477	-1.97639	0.367375	0.910009	0.836217	0.925839	0.610438
		63	1.10277	0.973054	2.40797	2.82822	2.82065	1	6.39376	0.00113934	-1.74737	1.23571	0.726442	0.810235	0.935127	0.58504
		64	1.11731	0.959827	2.47276	2.47719	2.94759	1.62731	12.2953	0.00209473	-0.322905	1.86967	0.856981	0.707423	0.935003	0.381251
		65	1.0923	0.980266	2.37299	2.93571	1.85761	1.04282	8.37422	0.0012192	-1.97997	0.470484	0.61614	0.82619	0.935031	0.598255
		66	0.973577	0.983013	2.57268	2.97001	1.46781	1.06143	2.52997	0.00100453	-1.96338	-0.0311743	0.875665	0.841749	0.926318	0.587019
		67	1.4313	0.93301	2.1733	1.97201	2.7908	1.0062	11.6691	0.00191226	-1.83986	0.553702	-1.75667	0.741751	0.950133	0.641929
		68	1.09082	0.980473	2.36959	2.68184	2.22376	1.00121	9.08496	0.00101099	-1.92915	0.490143	0.649372	0.821848	0.935129	0.585796
		69	1.03169	0.982665	2.47846	2.64767	1.95677	1.06889	4.71918	0.00106079	-1.93301	0.719552	0.82427	0.831651	0.930873	0.603297
		70	1.2874	0.947402	2.24991	2.45345	2.47527	1.03409	10.9279	0.00111942	-0.861981	0.242055	-0.435474	0.78141	0.945263	0.656929
		71	1.03234	0.971974	2.48197	2.976	2.83898	1.06054	7.22376	0.00111534	-0.214136	1.39719	0.925981	0.78559	0.929897	0.480423
		72	0.951337	0.963672	2.95237	2.93668	1.05576	1.12778	1.53441	0.00219919	-0.39916	-0.0749891	0.939242	0.836866	0.909807	0.591302
		73	0.976268	0.920133	2.70183	2.96274	1.49452	1.12953	1.50252	0.00224886	-1.97428	-0.0586604	0.862059	0.845876	0.912834	0.60565
		74	1.28328	0.946454	2.2323	2.43306	1.50069	1.00729	9.06686	0.00214818	-1.98459	-0.109424	-0.829029	0.808268	0.945231	0.658442
		75	1.18852	0.971936	2.38213	2.04329	2.9307	1.00902	16.5871	0.0010168	-0.455621	1.43476	0.538091	0.744886	0.940001	0.463119
		76	1.29352	0.945005	2.30681	1.96529	2.95092	1.02089	7.24965	0.00209314	-0.406401	0.46882	-0.277398	0.762639	0.945019	0.652293
		77	1.18952	0.964299	2.37769	2.02986	2.30227	1.02401	9.05264	0.00101036	-1.88911	0.759932	0.230948	0.804557	0.940708	0.650287
		78	1.03056	0.977646	2.45093	2.93384	2.55771	1.09847	4.66946	0.00105562	-1.89266	0.732632	0.850395	0.825742	0.930877	0.589887
		79	1.28481	0.943799	2.16069	2.886	2.76906	1.00121	8.37422	0.00100447	-1.93395	0.500893	-0.493378	0.791776	0.94527	0.692893
		80	1.29175	0.943618	2.13836	2.83924	2.9403	1.17818	11.9662	0.00100133	-0.227134	1.50579	-0.11914	0.742531	0.94495	0.581343
		81	0.978796	0.98272	2.58224	2.97469	1.49767	1.0635	1.62894	0.00167753	-1.9477	-1.04378	0.799797	0.846879	0.926628	0.574612
		82	1.11387	0.97186	2.47125	2.3275	2.94482	1.57184	7.20839	0.00101059	-0.322195	1.84878	0.837375	0.748062	0.935278	0.561938
		83	1.28331	0.946443	2.2494	2.45345	2.47903	1.06459	11.65	0.0010218	-1.84953	0.584944	-0.428085	0.787207	0.945145	0.66529
		84	0.926487	0.988002	2.68969	2.75771	1.04219	1.62663	3.59117	0.00101979	-0.319152	0.4344	0.951326	0.818407	0.921202	0.615974
		85	1.2935	0.944392	2.16838	2.88777	2.97878	1.37388	18.8027	0.00105053	-0.217355	1.97102	0.0592494	0.682298	0.944904	0.389996
		86	1.17001	0.967421	2.40786	2.04972	2.82541	1.01063	19.359	0.00100104	-0.405468	0.402347	0.498146	0.753547	0.940037	0.467027
		87	1.04198	0.977226	2.41718	2.98296	2.83101	1.63654	17.0359	0.00113276	-0.353094	1.93816	0.946817	0.693022	0.930712	0.276635
		88	1.04292	0.978055	2.48162	2.81275	2.89593	1.62765	5.46655	0.00205393	-0.419466	1.9541	0.943606	0.754929	0.929898	0.515876
		89	1.11384	0.97186	2.47125	2.46715	2.94504	1.54191	19.6563	0.00101059	-0.318037	1.86979	0.862891	0.692569	0.935404	0.324021
		90	1.0283	0.983708	2.47127	2.93663	1.2905	1.04555	4.02905	0.00107558	-1.97078	-0.921813	0.65245	0.844111	0.930979	0.610189
		91	1.42982	0.933312	2.14597	1.98013	2.78957	1.00961	11.6355	0.00190705	-1.96359	0.319133	-1.84571	0.745815	0.95014	0.652888
		92	1.4313	0.945003	2.17313	1.99435	1.77582	1.06237	12.1151	0.00102409	-1.76383	0.618001	-2.21183	0.769431	0.950207	0.691396
		93	1.18852	0.972013	2.4106	2.04468	2.9307	1.07633	17.1223	0.00103955	-0.455621	1.4348	0.554833	0.73716	0.940022	0.455772
		94	1.18852	0.972024	2.41072	2.04329	2.9307	1.00902	16.9955	0.00105467	-0.455621	1.43476	0.549398	0.740487	0.940015	0.448525
		95	1.29349	0.933405	2.16664	2.98003	2.94922	1.01338	19.291	0.00101816	-0.279568	1.50579	-0.094607	0.726427	0.945035	0.451899
		96	1.43176	0.933476	2.16499	2.12511	1.7315	1.0627	12.1758	0.00224581	-1.81997	0.855824	-2.04632	0.762033	0.950021	0.577857
		97	1.18999	0.971429	2.41309	2.02937	2.99331	1.04294	16.9955	0.00101993	-0.138259	1.53451	0.579157	0.72633	0.939972	0.431395
		98	1.20655	0.945906	2.45233	2.12589	1.09826	1.07622	8.08591	0.00204705	-1.99381	-0.0766908	-0.221926	0.822006	0.940337	0.663057
		99	1.43615	0.946702	2.13087	2.03857	2.88756	1.00704	18.2554	0.0016396	-1.03488	0.569985	-1.57966	0.705346	0.950119	0.513083
		100	1.03464	0.972175	2.47641	2.97996	2.84108	1.06932	7.22376	0.00111904	-0.374909	1.40242	0.921336	0.790671	0.930161	0.495604
		101	1.10486	0.971883	2.42957	2.39729	2.82065	1.01596	11.1812	0.00100793	-0.509914	1.95898	0.827638	0.762224	0.935048	0.476997
		102	1.03234	0.971968	2.48105	2.976	2.83898	1.06054	8.89323	0.00101177	-0.214136	1.48673	0.928585	0.776411	0.929954	0.453333
		103	0.967928	0.984806	2.60557	2.97768	1.87876	1.13193	3.7079	0.00132492	-0.505781	0.551837	0.942552	0.824738	0.924992	0.558453
		104	1.43615	0.94767	2.13257	2.03646	2.89159	1.03705	18.2554	0.00172184	-1.03488	0.570455	-1.56009	0.700237	0.950047	0.501971
		105	1.09839	0.966031	2.3629	2.94474	2.8943	1.09545	6.8703	0.00102166	-1.89128	1.74048	0.768872	0.805369	0.934978	0.593982
		106	1.2935	0.944392	2.16838	2.9381	2.94963	1.36542	18.5393	0.00105053	-0.46786	1.96845	0.0302358	0.694748	0.944931	0.417405
		107	1.17676	0.966592	2.40668	2.02224	2.43	1.36621	11.3072	0.00100005	-0.180418	0.697273	0.468577	0.768991	0.940005	0.606661
		108	1.17676	0.966275	2.40668	2.02224	2.43731	1.09559	11.3162	0.00102875	-1.92155	0.738041	0.34369	0.796138	0.940209	0.622483
		109	1.43018	0.934171	2.17687	1.97201	1.7963	1.08713	12.1116	0.00223115	-1.76383	0.827641	-1.98952	0.75793	0.950078	0.581108
		110	0.934126	0.927525	2.91308	2.95512	1.0372	1.63724	1.14857	0.00101979	-1.08321	0.420123	0.945884	0.835325	0.90302	0.663384
		111	1.18375	0.96502	2.48165	1.92506	1.83137	1.04872	7.79378	0.00118265	-1.98119	-0.0155226	0.0997681	0.816471	0.940369	0.669717
	2	112	0.926411	0.904251	2.5817	2.99281	1.4078	1.12967	3.48235	0.00110849	-1.36965	-0.530044	0.903628	0.841322	0.903134	0.564931
		113	0.964181	0.972145	2.59694	2.87009	1.40372	1.09096	3.7099	0.0010446	-1.83396	-0.302219	0.877167	0.841854	0.925106	0.573095
		114	0.930422	0.974462	2.56693	2.9896	1.33131	1.44938	1.45398	0.00369417	-1.83588	0.336903	0.93451	0.835778	0.920872	0.6197
		115	0.966842	0.984553	2.58788	3	1.48998	1.40796	3.1164	0.00173118	-0.457871	0.418201	0.94003	0.825134	0.924967	0.609586
		116	1.30257	0.951801	2.1879	2.52097	1.43657	1.03325	9.05686	0.00159332	-1.679	0.46585	-0.934144	0.803316	0.945852	0.678789
		117	1.44027	0.934972	2.05578	2.40064	2.1981	1.00443	9.74482	0.00196754	-1.88009	1.21028	-2.03217	0.763333	0.950009	0.651088
		118	0.937955	0.885211	2.56693	2.99142	1.32666	1.33867	3.55231	0.00143565	-1.92154	-0.415872	0.874771	0.845621	0.896367	0.604714
		119	0.961205	0.985775	2.58459	2.99679	1.46473	1.40495	2.58046	0.00124504	-1.95047	0.471488	0.920464	0.835651	0.925032	0.628701
		120	1.17711	0.967304	2.40899	2.08517	2.32884	1.35475	9.11758	0.00109966	-1.7219	0.788392	0.363064	0.791856	0.94003	0.658018
		121	1.18505	0.954101	2.19927	2.62085	1.81925	1.14719	8.55826	0.00175263	-1.92676	-0.566232	-0.069509	0.815733	0.940205	0.646993
		122	0.977883	0.977768	2.55244	2.97085	1.9163	1.12649	1.08833	0.001	-0.777227	0.752953	0.931487	0.829922	0.925483	0.604683
		123	1.17669	0.967291	2.40895	2.08517	2.32623	1.04854	9.11758	0.00122856	-1.85917	0.796904	0.338314	0.802769	0.940001	0.629688
		124	0.874378	0.986075	2.72853	0.622751	0.830712	1.10889	7.24092	0.0879633	0.0682707	1.48908	0.95767	0.750504	0.627254	0.588118
		125	1.03358	0.97824	2.55228	2.42892	2.48715	1.59859	9.34941	0.00179278	-0.417914	1.49276	0.938667	0.758423	0.929968	0.464568
		126	1.19171	0.953871	2.35255	2.59263	1.82857	1.12365	8.6688	0.00103536	-1.94644	0.982166	0.165659	0.812312	0.940249	0.663503
		127	1.03356	0.977691	2.52964	2.96332	1.40299	1.01041	4.80302	0.00106097	-1.9381	-0.147328	0.728793	0.842691	0.930412	0.603691
		128	1.1918	0.978289	2.5479	1.63944	2.64503	1.86165	13.755	0.00124364	-0.477926	1.18199	0.549937	0.712654	0.940025	0.506805
		129	1.10643	0.970485	2.44791	2.64816	2.65218	1.27682	13.1671	0.00176141	-0.0871576	1.31962	0.829092	0.740857	0.934941	0.40133
		130	1.08769	0.978198	2.475	2.35764	1.50465	1.08491	6.71725	0.00103506	-1.9014	-0.499556	0.499697	0.833805	0.935304	0.636369
		131	1.44027	0.935212	2.05578	2.40064	1.93175	1.01141	9.36987	0.00197008	-1.88009	1.21028	-2.16394	0.769839	0.949999	0.654
		132	1.28907	0.952214	2.35587	1.86714	2.09549	3.14974	14.5867	0.00183339	-1.36219	1.38227	-0.0539786	0.622307	0.944901	-0.093492
		133	1.09981	0.971181	2.43683	2.38261	2.54981	1.91724	13.8944	0.00133925	-0.709035	1.44138	0.835462	0.738774	0.93521	0.454955
		134	1.02946	0.978883	2.45937	2.94194	2.31779	1.15454	5.22015	0.00106303	-1.92468	1.52631	0.886648	0.821748	0.93013	0.588274
		135	1.04077	0.980244	2.54704	2.33887	2.59769	1.59387	9.37025	0.00170394	1.49695	1.15458	0.951376	-1.66851	0.929909	0.366475
		136	1.29048	0.953981	2.37371	1.86831	2.06808	1.12138	11.7552	0.0019388	-1.9833	0.694263	-0.434334	0.77519	0.945075	0.604483
		137	1.29393	0.952215	2.3633	1.88206	2.16564	3.13899	14.5867	0.00122365	-1.36598	1.56881	-0.0732868	0.628295	0.945014	-0.0198116
		138	1.44027	0.930052	2.05579	2.40064	2.67673	1.01141	9.36987	0.00197008	-1.88009	1.21028	-1.85796	0.751062	0.949969	0.661968
		139	1.43684	0.925988	2.06207	2.87516	2.67241	1.97478	11.3282	0.00176397	-1.14229	1.21057	-1.52734	0.655313	0.950004	0.333312
		140	1.10011	0.967272	2.41867	2.79961	2.55663	1.04949	7.73172	0.00100516	-1.07843	0.895889	0.720463	0.81022	0.935304	0.588153
		141	1.19202	0.978289	2.50359	1.63944	2.63784	1.86165	14.0037	0.00137973	-0.474778	1.27273	0.555421	0.708263	0.939896	0.480138
		142	1.28726	0.951809	2.36819	1.86831	2.33046	1.12138	12.1125	0.00194204	-1.24862	0.706698	-0.28009	0.761111	0.944973	0.579494
		143	1.09707	0.95497	2.41963	2.91647	2.57401	1.05501	8.08115	0.00101183	-1.94445	0.504765	0.649607	0.819787	0.935012	0.599783
		144	1.1833	0.966694	2.41492	2.08517	2.59014	1.3388	9.16917	0.00195388	-0.412002	0.771317	0.476009	0.762651	0.939949	0.575051
		145	1.10011	0.968106	2.4265	2.71657	2.56969	1.11892	5.32358	0.00142968	-0.687146	0.899406	0.741241	0.806697	0.93501	0.604243
		146	0.938017	0.997997	2.60214	2.99421	1.38076	1.4024	1.91901	0.00183764	-0.906252	0.490799	0.947547	0.827095	0.922549	0.613552
		147	1.43684	0.931357	2.06207	2.5861	2.61534	1.36708	10.8903	0.00176397	-0.215072	1.21057	-1.532	0.696772	0.949949	0.529113
		148	1.01086	0.958138	2.66139	2.88885	1.16079	1.15396	4.38874	0.001	-1.971	-0.780052	0.732112	0.845035	0.925177	0.61296
		149	1.19181	0.978236	2.5071	1.63944	2.6497	1.3372	13.7841	0.00134762	-0.474778	1.27382	0.526552	0.736516	0.939885	0.518751
		150	1.18373	0.966635	2.41448	2.1017	2.6519	1.33688	10.5916	0.0012312	-0.412002	0.780321	0.46769	0.765454	0.940171	0.597721
		151	0.922171	0.987095	2.98852	1.9896	0.349312	1.36792	2.69178	0.0965555	-1.11827	1.25014	0.953681	0.805467	0.906001	0.685751
		152	0.924434	0.915602	2.57985	2.97002	1.30368	1.46044	1.71413	0.0021338	-0.394458	0.814664	0.950886	0.825524	0.90474	0.61667
		153	1.03358	0.977459	2.55228	2.42359	2.49598	1.24143	9.35459	0.00166302	-0.417914	1.22085	0.923623	0.779965	0.930237	0.470864
		154	1.28743	0.951809	2.36819	1.86831	2.33046	1.36781	12.4219	0.00194602	-1.24862	0.706698	-0.250332	0.745369	0.944991	0.563407
		155	1.29393	0.951118	2.35661	1.88206	2.16564	1.42085	14.6709	0.00133816	-0.52576	1.56881	-0.121373	0.722611	0.944883	0.488318
		156	0.928221	0.983052	2.57673	2.96417	1.40356	1.44636	1.53305	0.00110293	-1.90543	0.696361	0.942271	0.832628	0.921519	0.62612
		157	0.938017	0.997997	2.60895	2.99421	1.38076	1.4024	1.91901	0.00183764	-0.0971484	0.490799	0.951266	0.81991	0.92171	0.59887
		158	0.964627	0.895905	2.56785	2.98656	1.44699	1.35267	3.0272	0.00125197	-1.92467	-0.353603	0.843708	0.846693	0.90581	0.6275
		159	1.19146	0.95328	2.33155	2.53765	1.82857	1.09795	8.65715	0.00184713	-1.95359	1.10474	0.208486	0.806909	0.940354	0.618364
		160	0.878871	0.896441	2.72853	0.623057	0.824236	1.00849	7.26666	0.0931533	0.257815	1.47522	0.961691	0.757802	0.59754	0.598731
		161	1.03182	0.978506	2.43258	2.99614	2.56954	1.3007	6.58141	0.00116929	-0.674479	1.3499	0.917226	0.798818	0.930312	0.551555
		162	1.29393	0.952215	2.3633	1.8968	2.16564	3.139	14.6196	0.00122365	-1.93814	1.56881	-0.121207	0.641852	0.94505	0.0220183
		163	1.04077	0.979959	2.54602	2.36654	2.63667	1.33735	10.1136	0.00193541	1.48894	1.13412	0.948108	-1.63112	0.929857	0.331028
		164	1.43162	0.935819	2.06364	2.39503	1.53359	1.12567	9.28967	0.00173642	-1.94373	-0.741761	-2.8355	0.781619	0.950339	0.693627
		165	0.930421	0.91429	2.55244	2.97085	1.93009	1.39875	1.62995	0.00118655	-0.778242	0.693705	0.94857	0.829735	0.906539	0.615186
		166	1.43684	0.926736	2.06188	2.94597	2.59619	1.10984	11.1428	0.00176376	-0.782082	0.760636	-1.79043	0.736246	0.950109	0.618547
		167	1.03567	0.978352	2.55228	2.42892	2.48715	1.59859	9.37456	0.00133825	-0.417914	1.49276	0.935897	0.76348	0.930274	0.492473
		168	0.874858	0.986893	2.91031	0.701867	0.329277	1.42897	7.19643	0.0886256	0.0758641	0.962527	0.963594	0.748117	0.692317	0.500095
		169	1.28774	0.952305	2.35587	1.85348	2.64641	1.17439	10.0806	0.00102277	-0.472195	0.563529	-0.260821	0.75833	0.945131	0.666661
		170	0.928452	0.953138	2.56693	2.98799	1.44567	1.21866	1.36724	0.00220083	-1.93908	-0.508091	0.897638	0.84145	0.918477	0.577969
		171	1.18262	0.966662	2.4188	2.08192	2.59304	1.37738	8.85927	0.00135383	-0.681414	0.895434	0.461151	0.772822	0.93997	0.620359
		172	1.09948	0.970583	2.41596	2.71648	2.66022	1.265	9.03438	0.00114142	-0.698657	1.42684	0.803895	0.785703	0.934971	0.557827
		173	1.28917	0.954615	2.35312	1.86831	2.09528	1.12792	11.9967	0.0019388	-1.85889	1.20093	-0.31268	0.768416	0.944941	0.579331
		174	1.19181	0.978236	2.55164	1.64634	2.6497	1.34262	13.7412	0.00134762	-0.418577	1.27382	0.542098	0.73335	0.939881	0.515408
		175	1.28726	0.952528	2.37371	1.86831	2.08973	1.12138	12.0994	0.00194204	-1.87683	0.694263	-0.39227	0.7732	0.944994	0.595159
		176	1.10011	0.968106	2.42124	2.71657	2.61206	1.11892	5.1079	0.00139453	-1.90827	0.912943	0.689799	0.81489	0.935247	0.623444
		177	1.02133	0.987317	2.45623	2.97339	2.19582	1.28437	5.60737	0.00101799	-1.85169	0.718358	0.867075	0.826838	0.930075	0.609494
		178	1.10011	0.96665	2.41876	2.78291	2.54688	1.59309	12.1556	0.00146995	-0.661441	1.41581	0.825053	0.756699	0.934934	0.479887
		179	0.96537	1.14405	2.76369	1.01831	0.724698	1.23389	5.88684	0.0566421	0.150597	1.82069	0.95892	0.72993	0.802508	0.503473
		180	0.962195	0.976258	2.73678	1.07654	0.816447	1.37009	5.8029	0.0526572	1.18758	1.82675	0.960616	-1.08963	0.849448	0.473192
		181	0.968077	0.998281	2.55244	2.97081	1.93009	1.39875	4.77336	0.001	-0.778242	0.751491	0.94611	0.818977	0.925335	0.581599
		182	1.18262	0.966277	2.4188	2.08192	2.59304	1.06473	8.82765	0.00135383	-0.681414	0.895434	0.437367	0.786798	0.93997	0.603573
		183	1.09707	0.95497	2.41963	2.91647	1.79516	1.13284	8.08115	0.00101183	-1.94375	0.504765	0.585932	0.829392	0.935029	0.633022
		184	0.928452	0.885831	2.59257	2.99313	1.33937	1.61413	1.45398	0.00162761	-2	0.337896	0.921253	0.839716	0.894159	0.659257
		185	1.28736	0.949386	2.1879	2.5429	1.94135	1.02138	9.05604	0.00192898	-1.88241	0.461003	-0.628711	0.798963	0.94526	0.655137
		186	1.43162	0.935819	2.08192	2.39292	1.53359	1.11748	14.6695	0.00154683	-1.94373	-0.741761	-2.70425	0.773693	0.950675	0.608938
		187	1.10011	0.971181	2.43683	2.38261	2.54981	1.09777	6.97052	0.00133925	-0.709035	1.46373	0.785616	0.795338	0.934894	0.568297
		188	1.29345	0.951118	2.35661	1.86032	2.58945	1.42085	8.86481	0.00135445	-0.52576	0.885764	-0.220367	0.740486	0.945018	0.642054
		189	1.02625	0.974294	2.45017	2.89776	2.28683	1.17284	7.55173	0.001	-1.36004	1.27312	0.894635	0.815734	0.930201	0.563708
		190	1.18688	0.951847	2.24136	2.75363	1.73996	1.08244	9.66835	0.001	-2	-0.459613	-0.101669	0.82236	0.941202	0.669808
		191	0.969379	0.997985	2.54739	2.98762	2.07215	1.39875	1.87291	0.00100031	-0.801311	0.736624	0.944928	0.82256	0.925021	0.614788
		192	1.09948	0.967965	2.41475	2.71709	2.65353	1.07205	9.03438	0.00114053	-0.677019	1.42684	0.791891	0.791974	0.93499	0.539076
		193	1.02127	0.987781	2.48415	2.9662	1.9271	1.01186	5.25787	0.00165396	-1.77937	-0.133287	0.805752	0.835693	0.930155	0.555497
		194	1.09948	0.970583	2.41104	2.71684	2.66664	1.265	9.03438	0.0015847	-0.718046	1.42684	0.809967	0.77897	0.934907	0.526786
		195	1.11426	0.966458	2.51048	2.19962	2.85391	1.54313	12.1041	0.0010765	1.09004	1.41909	0.865532	0.0261833	0.935194	0.386066
		196	0.98798	0.978326	2.55205	2.79871	2.5318	1.42204	2.82255	0.00162177	-0.428974	1.49381	0.950961	0.796187	0.92546	0.569885
		197	1.18959	0.975224	2.5046	1.66201	2.63105	1.83629	13.1697	0.00107423	-0.490185	1.2619	0.543789	0.722882	0.939987	0.5358
		198	1.02606	0.976804	2.44487	2.84872	2.20807	1.00705	3.29403	0.00155116	-1.89937	0.701065	0.838317	0.83215	0.930297	0.588303
		199	1.02945	0.981879	2.42417	2.71432	2.73535	1.37351	7.5144	0.00168682	-0.687146	1.12905	0.919023	0.792766	0.92996	0.527078
		200	0.873984	0.986893	2.91031	0.649294	0.338848	1.25594	7.16151	0.0808221	0.0336984	1.33307	0.966109	0.73906	0.660853	0.522696
		201	0.991158	0.942231	2.5576	2.98625	1.15465	1.14463	4.867	0.00103496	-1.96363	-0.792976	0.757963	0.847307	0.923981	0.602317
		202	1.19526	0.978289	2.47574	1.67353	2.63361	1.20695	13.8282	0.00100422	-0.474778	1.49404	0.505763	0.747995	0.939876	0.544406
		203	1.2898	0.946359	2.1775	2.83428	1.8098	1.1599	9.42973	0.00186556	-1.83281	1.23018	-0.514353	0.790036	0.944976	0.624908
		204	0.972533	0.929581	2.62263	2.97553	1.29913	1.37753	3.38309	0.00109322	-1.9405	-0.459766	0.837303	0.845885	0.917844	0.627584
		205	1.28851	0.945678	2.1573	2.83607	1.82979	1.15827	9.23185	0.00186556	-1.8933	1.12357	-0.542593	0.79202	0.945072	0.63488
		206	0.943765	0.964154	2.59528	3	1.24374	1.33784	3.38011	0.001	-1.99885	-0.383206	0.890754	0.840101	0.922439	0.601743
		207	1.28952	0.953981	2.368	1.86831	2.06808	1.12026	11.7627	0.00125885	-1.94261	0.694263	-0.475619	0.784075	0.945239	0.655938
		208	1.10011	0.970909	2.42764	2.78535	2.54681	1.06128	8.07887	0.00104534	-0.661441	1.11416	0.761113	0.801984	0.934941	0.565219
		209	1.04149	0.976741	2.53666	2.77995	2.84155	1.59859	8.61185	0.00105408	-0.406457	1.4516	0.933287	0.768375	0.930253	0.523501
		210	0.993965	0.970077	2.58729	2.28345	2.54581	1.4477	7.47523	0.00106093	0.512771	1.49792	0.955057	0.606642	0.924879	0.419074
		211	1.02935	0.978506	2.43162	2.94704	2.56969	1.15374	4.99433	0.00105991	-0.640312	1.22563	0.908743	0.810083	0.930072	0.563107
		212	0.922163	0.901964	2.62761	2.93855	1.58148	1.4323	1.42826	0.00160278	-1.89046	0.740499	0.940435	0.836275	0.899896	0.625776
		213	1.19526	0.978291	2.50862	1.67501	2.64525	1.27324	13.8716	0.00130779	-0.475055	1.21965	0.502526	0.740275	0.940148	0.522958
		214	0.992291	0.970771	2.58729	2.1015	2.29884	1.43325	6.97139	0.0011805	0.512771	1.49722	0.955662	0.625133	0.923464	0.438568
		215	1.12205	0.966068	2.51051	2.19397	2.85391	1.54313	9.31275	0.00146148	1.09887	1.50509	0.855207	0.0379464	0.935255	0.421238
		216	1.03027	0.970376	2.44784	2.85801	2.66236	1.44288	14.6432	0.00151569	-0.0871576	1.41842	0.942062	0.726695	0.929879	0.317165
		217	1.09981	0.971181	2.43683	2.38261	2.54868	1.91724	13.8944	0.00168756	-0.709499	1.44138	0.84018	0.733929	0.935097	0.427619
	3	218	0.942162	0.898018	2.55592	2.99454	1.41705	1.213	1.32552	0.00396711	-1.6059	0.902179	0.929872	0.840023	0.90128	0.615984
		219	0.915905	0.904118	2.63598	2.90178	1.41929	1.49297	2.0341	0.001	-1.44631	0.564605	0.944767	0.83519	0.899745	0.634468
		220	0.915905	0.986223	2.64476	2.90178	1.41929	1.48579	1.03649	0.00104127	-1.45077	0.564605	0.945142	0.831077	0.92003	0.624095
		221	0.970353	0.985875	2.57615	3	1.85729	1.48233	3.56188	0.00110444	-1.16888	1.22607	0.946827	0.81884	0.925006	0.601654
		222	0.936267	0.941716	2.88411	2.8006	1.28894	1.16686	3.56072	0.00118353	0.156624	-0.0434298	0.950205	0.825595	0.909667	0.559265
		223	1.20983	0.967692	2.40543	2.01293	2.86445	1.49451	12.3522	0.00128236	1.24618	1.97275	0.640268	-0.117683	0.940078	0.345648
		224	1.44341	0.948894	2.1046	2.06421	1.3644	1.06867	16.4242	0.00109979	-1.79468	1.12944	-2.3928	0.765463	0.95015	0.578659
		225	1.30141	0.939073	2.06497	2.99516	1.54152	1.0263	6.62135	0.00255657	-1.7682	0.0216662	-1.09635	0.806525	0.945354	0.698904
		226	0.917285	0.954702	2.41315	1.35803	1.04448	1.22673	3.60734	0.076771	-0.198532	0.938291	0.954959	0.798564	0.837689	0.650868
		227	1.3087	0.9502	2.15822	2.86662	2.48974	1.00471	6.65851	0.00108631	-1.5945	1.80868	-0.457819	0.78091	0.945021	0.676986
		228	0.953738	0.974827	2.5407	1.47416	1.85396	1.45446	3.08345	0.00100472	0.245894	1.13813	0.956188	0.784067	0.895885	0.607777
		229	1.30025	0.938907	2.10589	2.68275	2.10313	1.00364	7.08017	0.00245859	-1.03936	0.551696	-0.676995	0.791777	0.945111	0.665036
		230	0.942763	0.9162	2.58967	2.99657	1.27538	1.5034	3.81899	0.001	-1.45079	-0.0288267	0.911636	0.840416	0.91029	0.635194
		231	1.03007	0.971793	2.47606	2.98377	2.80032	1.2158	3.43119	0.00115188	-1.11396	1.02879	0.897253	0.815014	0.930052	0.598296
		232	1.04602	0.979099	2.54242	2.09267	2.84946	1.48549	13.152	0.0011404	-0.336264	1.8588	0.939596	0.72847	0.930439	0.406932
		233	1.46509	0.943893	2.13467	2.11823	2.86083	2.09535	12.95	0.0010975	-0.32389	1.8612	-1.42103	0.581288	0.95012	0.203553
		234	1.03434	0.975939	2.44221	2.68982	2.84929	1.20466	6.82777	0.00110638	-0.90653	1.85136	0.925489	0.789198	0.930012	0.535714
		235	0.97038	0.941712	2.86854	2.09547	1.30246	1.50741	16.4659	0.00118459	0.13431	0.876713	0.955282	0.746717	0.916014	0.360969
		236	1.46258	0.943893	2.13467	2.11069	2.86109	1.29731	16.7827	0.00112579	-0.32389	1.8612	-1.46975	0.660061	0.950188	0.462594
		237	0.97591	0.977377	2.52105	2.95343	1.77491	1.48029	4.72584	0.00113593	-0.352606	1.22981	0.950051	0.80202	0.925304	0.560896
		238	1.11471	0.967665	2.44181	2.56904	2.85381	1.50192	12.347	0.00128602	-0.0580761	1.97275	0.859992	0.705607	0.93526	0.3909
		239	1.02818	0.977012	2.47606	2.99043	2.76736	1.06867	3.43132	0.00100063	-1.69053	1.0998	0.884287	0.821363	0.93005	0.582935
		240	1.30434	0.9502	2.15822	2.86662	2.48974	1.00526	6.65851	0.00108631	-1.5945	1.06428	-0.574216	0.78681	0.945324	0.699085
		241	1.10081	0.971748	2.36074	2.70403	2.80079	1.20016	5.2069	0.00115043	-1.48583	1.23902	0.738356	0.805751	0.935142	0.624212
		242	0.929834	0.98845	2.45909	1.27904	0.768552	1.20893	3.86872	0.080056	0.583348	1.23574	0.960355	0.650727	0.836424	0.629471
		243	0.966217	0.986131	2.57887	2.94874	1.83928	1.21213	2.03602	0.00108927	0.0254163	0.0860017	0.940086	0.82658	0.9251	0.597579
		244	1.29986	0.958702	2.37879	1.69744	2.31985	1.07958	12.5746	0.00109738	-1.04526	1.82877	-0.199921	0.758568	0.945043	0.600086
		245	1.44903	0.943803	2.14851	2.09595	1.07931	1.01414	7.27259	0.00200306	-1.45442	0.560264	-2.86899	0.776409	0.95003	0.692938
		246	1.29861	0.940827	2.16055	2.83281	2.51437	1.11406	14.1268	0.00110206	-1.5998	1.86019	-0.281726	0.765874	0.945371	0.577914
		247	1.69861	0.946881	2.47231	0.84281	2.92163	1.08895	12.1841	0.00110201	-0.308365	1.24743	-4.8949	0.600918	0.955093	0.630317
		248	1.0103	0.962412	2.65033	2.77244	1.03322	1.0064	3.95722	0.00128974	-1.70983	-1.6065	0.648166	0.846054	0.926518	0.578826
		249	0.970295	0.988296	2.57062	2.95155	1.855	1.49628	6.80156	0.00102712	1.12494	0.342828	0.955063	-0.633943	0.92544	0.517754
		250	1.69045	0.949739	2.48027	0.785774	0.973874	1.00988	16.7275	0.00167325	-1.82477	1.23926	-6.3626	0.711081	0.955234	0.40198
		251	0.960306	0.985329	2.57694	2.99719	1.44534	1.21779	3.25196	0.00102427	-1.55669	0.476305	0.924759	0.835052	0.925048	0.60395
		252	1.17476	0.967104	2.44485	2.06506	1.80494	1.00224	11.9428	0.00107959	-0.995253	0.0609485	0.247654	0.805263	0.940225	0.606524
		253	1.10081	0.971255	2.36127	2.69923	2.20996	1.19988	6.64641	0.00115535	-1.76499	1.11012	0.678307	0.81584	0.935466	0.63038
		254	1.11038	0.971977	2.47348	2.09881	2.83843	1.14443	6.65378	0.00104774	-1.4699	1.87961	0.776356	0.79155	0.935281	0.602788
		255	0.942746	0.971481	2.57623	2.6918	1.89764	1.50924	1.32326	0.00104787	-0.387806	0.954581	0.951054	0.816965	0.920107	0.614578
		256	1.46509	0.943893	2.12762	2.11823	2.86979	2.05045	12.95	0.00108638	-0.32389	1.8612	-1.43221	0.586386	0.950152	0.228694
		257	1.6884	0.94694	2.42268	0.875632	2.11776	1.08895	12.1841	0.00191194	-0.34327	0.591941	-5.4003	0.65103	0.955259	0.563256
		258	0.940266	0.947082	2.63392	2.97903	1.45897	1.21258	1.34558	0.00218039	-1.56616	0.884812	0.940082	0.836141	0.917107	0.602217
		259	1.46054	0.938715	2.05714	2.16439	2.86405	1.07341	16.4538	0.00108657	0.101188	1.8694	-1.5165	0.676172	0.950009	0.494575
		260	0.93149	0.972316	2.50248	1.26383	0.766532	2.10375	6.74436	0.00243301	0.551351	1.22162	0.96058	0.621148	0.866272	0.467832
		261	1.69591	0.949608	2.4778	0.870228	2.7951	1.00516	11.023	0.00100457	-1.11537	1.2242	-5.127	0.637494	0.955001	0.694722
		262	1.6941	0.947162	2.47417	0.858979	2.86263	1.16123	12.1841	0.00103864	-0.362766	1.24887	-4.84745	0.595897	0.95505	0.611691
		263	1.30068	0.958702	2.37879	1.69744	2.88076	1.07958	12.5746	0.00109949	-1.04526	1.82924	-0.0907962	0.744486	0.945061	0.598954
		264	1.29861	0.942314	2.15821	2.83281	2.73186	2.06506	12.2914	0.00110405	-0.287744	1.84076	-0.0281876	0.672256	0.945126	0.366632
		265	1.1017	0.949835	2.38256	2.99561	1.8691	1.07331	5.79599	0.00108305	-1.16185	0.475558	0.583885	0.825724	0.935113	0.641292
		266	1.29871	0.9589	2.38081	1.69744	2.85795	2.0335	13.1417	0.00175554	1.9632	0.702003	0.121406	-1.48499	0.945071	0.321626
		267	1.10669	0.972158	2.43978	2.50058	2.84777	1.15435	6.78414	0.00105059	-0.956298	1.83001	0.803326	0.783733	0.935038	0.578621
		268	0.992301	0.975599	2.58761	2.9546	1.61785	1.07996	2.66405	0.00191374	-1.89094	0.399588	0.877354	0.840261	0.92669	0.592591
		269	1.17402	0.965937	2.36164	2.04201	1.55097	1.01365	12.0607	0.00107578	-1.44341	0.449719	0.191726	0.810007	0.940133	0.620855
		270	1.30025	0.95913	2.38081	1.69744	2.85795	2.0984	12.7513	0.00176775	1.9632	0.702003	0.113826	-1.4783	0.945116	0.31068
		271	0.933993	0.968453	2.87917	2.80678	1.28894	1.15645	4.15799	0.00127732	-0.0407539	0.0474224	0.950072	0.822397	0.915332	0.545979
		272	1.29861	0.937286	2.15821	2.83281	2.48753	1.08295	12.0852	0.00110212	-1.59984	1.84076	-0.323822	0.774817	0.945279	0.613976
		273	1.6884	0.947501	2.41031	0.875632	2.69346	1.08895	12.1841	0.00191194	-0.34327	0.591941	-5.02055	0.621382	0.955121	0.596191
		274	1.3004	0.958703	2.37764	1.69744	2.88076	1.46371	12.7524	0.00109949	-1.07336	1.82676	-0.0472158	0.719286	0.945078	0.580616
		275	1.03453	0.971952	2.54892	2.50572	2.8407	1.29969	12.1843	0.00105062	-0.931065	1.8637	0.934583	0.760806	0.930062	0.455041
		276	1.30068	0.958702	2.37879	1.69744	2.88076	1.21356	12.5746	0.00104112	-1.04526	1.82924	-0.079299	0.73643	0.945073	0.604666
		277	1.44125	0.943872	2.08815	2.1762	2.46447	1.06837	12.0953	0.00112974	-1.52747	1.10962	-1.90352	0.745329	0.950047	0.664202
		278	1.44125	0.940578	2.08797	2.09349	2.19369	1.08283	12.0953	0.00112974	-1.52747	1.09851	-2.02986	0.751323	0.950147	0.661151
		279	1.106	0.972724	2.4405	2.50053	2.85451	1.15479	11.9394	0.00105062	-0.948545	1.97238	0.827297	0.761127	0.935174	0.492231
		280	1.02713	0.976753	2.44717	2.99043	2.8526	1.21481	3.4325	0.00108587	-1.05503	1.04057	0.902731	0.81457	0.930041	0.595889
		281	1.69099	0.949819	2.47664	0.872227	2.85795	1.10217	12.2287	0.00106932	-1.05125	1.25069	-4.91549	0.616956	0.955017	0.647584
		282	1.18691	0.96394	2.43575	2.00043	2.9776	2.72534	12.5827	0.00110487	-0.300568	1.24224	0.590381	0.667474	0.940132	0.362367
		283	1.69019	0.949537	2.47204	0.871635	2.18504	1.00471	12.2997	0.00100456	-1.11537	1.22358	-5.43028	0.667792	0.955148	0.654029
		284	1.10227	0.968262	2.41375	2.6789	2.86288	1.50909	12.0071	0.00101614	-0.960581	1.85868	0.840396	0.754074	0.935117	0.516852
		285	1.10073	0.970955	2.44347	2.50602	2.83843	1.1562	12.0686	0.00115158	-1.5229	1.90887	0.815749	0.772721	0.935048	0.507472
		286	1.17476	0.967171	2.44298	2.0753	1.83034	1.00224	12.3848	0.00107955	-0.856257	0.0609485	0.264775	0.802443	0.940217	0.5974
		287	1.02258	0.976919	2.47249	2.95154	2.37785	1.03092	3.96508	0.00101707	-0.835035	0.357734	0.868011	0.825741	0.930223	0.580551
		288	1.20018	0.968955	2.43975	2.01257	2.86679	1.51519	13.149	0.00101017	-1.0602	1.86325	0.53617	0.737168	0.940267	0.552699
		289	1.10246	0.948351	2.36699	2.95159	2.36913	1.01883	6.76779	0.00102351	-1.80102	0.928562	0.639014	0.822422	0.935127	0.614395
		290	1.02266	0.976919	2.47249	2.96897	1.23785	1.00772	3.30773	0.00186813	-1.88766	0.400071	0.773937	0.839416	0.930038	0.616683
		291	1.30981	0.959183	2.3804	1.69744	2.85969	1.1239	12.5736	0.00169827	1.86024	1.24314	0.0498031	-1.06466	0.945016	0.442151
		292	1.30533	0.951371	2.15004	2.99689	1.40385	1.00567	14.0378	0.00108305	-1.72549	1.27169	-0.806342	0.795181	0.945643	0.604637
		293	1.68402	0.947501	2.40889	0.875632	2.30504	1.08367	12.5856	0.00191194	-0.34327	0.569061	-5.19943	0.643846	0.955128	0.570981
		294	1.44125	0.940432	2.08797	2.5157	2.77411	1.00397	12.371	0.00112679	-0.953401	1.09851	-1.72621	0.735436	0.950041	0.648163
		295	1.10694	0.971955	2.47348	2.50126	2.90097	2.03441	13.0906	0.00105062	-0.966154	1.87961	0.855688	0.724916	0.935059	0.474098
		296	1.11471	0.967665	2.44181	2.56904	2.85138	1.5026	12.347	0.00165129	-0.0580761	1.97275	0.865055	0.697121	0.935141	0.354335
		297	1.03029	0.971642	2.49324	2.99079	2.83695	1.45453	5.14956	0.00114924	-0.971139	1.0788	0.911596	0.805514	0.930009	0.595482
		298	1.20256	0.967826	2.39613	2.01293	2.97079	1.48584	12.1737	0.00109277	0.107798	1.8454	0.58675	0.701113	0.940255	0.489026
		299	1.0126	0.887683	2.78689	2.99713	0.767311	1.01411	3.40935	0.00340785	-1.60661	-1.95316	0.561742	0.850002	0.899646	0.578466
		300	1.09981	0.971995	2.3577	2.70409	2.78184	1.00329	6.02779	0.00115043	-1.48583	1.01257	0.711666	0.812167	0.935359	0.594902
		301	1.03453	0.971952	2.54022	2.49733	2.19564	1.50461	11.5181	0.00105062	-0.931065	1.86375	0.931002	0.769879	0.930081	0.493137
		302	1.10694	0.971944	2.47619	2.12564	2.90521	2.06076	13.0908	0.00105062	0.138836	1.8449	0.883221	0.673155	0.935006	0.364097
		303	0.966265	0.951309	2.65466	2.94874	1.28029	1.21213	1.97742	0.0010897	-1.38046	0.0813808	0.899159	0.840257	0.921127	0.6271
		304	1.17934	0.967104	2.41176	2.01213	2.21621	1.07997	12.1795	0.00108022	-1.02876	1.02169	0.405664	0.788169	0.940046	0.585818
		305	0.973101	0.987571	2.57707	2.97982	1.84548	1.21358	2.56648	0.00118791	-1.57967	0.969281	0.932834	0.831069	0.92545	0.594719
		306	1.68553	0.942476	2.48027	0.843463	0.973874	1.00968	16.759	0.00103967	-1.82477	1.85791	-6.17301	0.70874	0.955145	0.449845
		307	1.44258	0.949638	2.1046	2.06038	1.60903	1.06649	12.1103	0.00110073	-1.67641	0.333047	-2.5497	0.77048	0.950203	0.690347
		308	1.69782	0.946881	2.44651	0.84281	2.52516	2.72655	12.2901	0.00110201	-0.259864	1.25315	-4.71411	0.349846	0.955157	-0.677443
		309	1.21404	0.967692	2.40543	2.01828	2.86445	1.49451	12.3522	0.00110262	1.24618	1.97275	0.618182	-0.107066	0.940307	0.369661
		310	1.68907	0.949819	2.47489	0.872227	2.85872	1.53972	12.2287	0.00106932	-1.05129	1.25069	-4.77244	0.551589	0.955009	0.461212
		311	1.30463	0.949956	2.38081	1.66972	2.85795	2.0984	12.7513	0.00176775	1.92762	0.702003	0.0706887	-1.28763	0.945267	0.310496
		312	1.18438	0.964106	2.43831	1.97218	2.72858	1.16133	12.0399	0.0010026	-0.392559	1.02009	0.488756	0.768224	0.940168	0.581171
		313	1.6884	0.943639	2.42268	0.875632	2.11776	1.08121	12.5828	0.00190789	-0.342847	1.00835	-5.22485	0.646091	0.955076	0.527326
		314	1.68467	0.949912	2.4778	0.850869	2.13164	1.00422	11.023	0.00101279	-1.4053	1.05518	-5.53742	0.681143	0.955091	0.689555
		315	0.942457	0.969957	2.55592	2.98571	1.41705	1.213	1.23349	0.00175196	-1.6059	0.902179	0.938257	0.835281	0.921422	0.608807
		316	1.30039	0.958338	2.40807	1.69736	2.85819	2.72677	15.9517	0.00184695	1.9632	0.711734	0.175732	-1.62723	0.945056	-0.012029
		317	1.4588	0.93888	2.07578	2.61103	2.88314	1.15084	15.7707	0.00100143	-0.317831	1.85892	-1.54045	0.685244	0.95008	0.522122
		318	1.10197	0.966933	2.3823	2.69196	2.83308	1.03349	7.5121	0.00129117	-1.1549	1.29099	0.756003	0.802787	0.935392	0.56383
		319	1.46509	0.943893	2.12762	1.98382	2.75793	2.05045	12.9489	0.00108697	-0.32389	1.86119	-1.47346	0.590275	0.950267	0.220551
		320	1.44125	0.940432	2.08797	2.5157	1.81654	1.00397	12.371	0.00112321	-0.953401	1.08322	-2.14253	0.757772	0.950108	0.635458
		321	1.08951	0.967661	2.3721	2.98211	1.21836	1.01795	6.64119	0.0016957	-1.8672	0.6039	0.55196	0.832188	0.93503	0.623824
		322	1.29871	0.959725	2.38081	1.69744	2.85279	2.0359	13.1055	0.00108205	1.95575	0.735718	0.0853325	-1.4462	0.945198	0.390423
		323	1.17934	0.967104	2.41179	2.04201	2.84356	1.07997	12.1795	0.00108022	-1.02876	1.02169	0.47879	0.776185	0.940026	0.573776
		324	0.952175	0.951539	2.48726	1.48952	1.85396	1.45446	3.08345	0.00100472	0.180766	1.13813	0.954782	0.791873	0.889016	0.615646
		325	1.20983	0.967692	2.40543	2.01293	2.84076	1.49525	12.3522	0.00128236	-0.367857	1.97275	0.544139	0.711446	0.940617	0.489431
		326	1.44875	0.943056	2.15148	2.00827	2.83372	1.07902	12.5669	0.00106682	-1.45855	1.85678	-1.58363	0.720796	0.950041	0.629802
		327	1.30025	0.95913	2.39281	1.69744	2.85795	2.0984	14.0709	0.00176775	1.9632	0.702003	0.1295	-1.5116	0.945114	0.275759
		328	1.10662	0.972089	2.47423	2.09679	2.90552	2.06076	12.6518	0.00105062	-0.966154	1.87911	0.849348	0.727163	0.935292	0.493055
		329	1.03644	0.97902	2.53885	2.52035	2.84946	1.48549	12.4168	0.00126375	-0.336264	1.8588	0.947067	0.720578	0.930091	0.372739
		330	1.17476	0.967198	2.44298	2.08033	1.83034	1.1601	12.3848	0.00108091	-0.856257	0.0609485	0.278468	0.796862	0.940206	0.612986
		331	1.69099	0.949819	2.47664	0.872227	2.85795	1.13232	12.2287	0.00106932	-1.05125	1.25069	-4.90746	0.612476	0.955018	0.638324
		332	1.71251	0.950879	2.53904	0.793808	1.03733	1.00155	12.1002	0.00195634	-1.80386	0.375069	-7.15765	0.723798	0.955674	0.566101
		333	1.10073	0.970955	2.44004	2.50256	2.83843	1.1562	12.0317	0.00115158	-1.5229	1.82837	0.810018	0.775309	0.935118	0.510851
		334	1.10119	0.949075	2.36699	2.9577	1.23044	1.01917	6.6402	0.00187014	-1.80011	0.048472	0.433077	0.835772	0.935453	0.629902
		335	1.29704	0.942138	2.14176	2.83281	2.837	1.15536	11.8624	0.00110144	-1.58875	1.97584	-0.202438	0.762385	0.945156	0.609745
		336	1.17981	0.965885	2.43812	2.00018	2.6858	1.01153	12.1947	0.00104689	-1.15617	0.966281	0.444125	0.783527	0.940086	0.576459
		337	1.20971	0.949444	2.43482	1.95437	2.92438	1.05983	12.1938	0.00177058	0.110526	1.95199	0.55015	0.709755	0.940016	0.426001
		338	1.6884	0.943639	2.42268	0.909786	2.11776	1.08121	12.5828	0.00190789	-1.93231	1.00835	-5.51753	0.670706	0.955204	0.580172
		339	1.66916	0.947006	2.47553	0.875966	1.94686	1.07817	12.3192	0.00103229	-0.975952	0.0413239	-5.67675	0.685643	0.955157	0.681932
		340	1.69782	0.946881	2.44651	0.863181	2.51487	2.72655	12.2095	0.00110201	-0.259864	1.18707	-4.73626	0.351336	0.955244	-0.668693
		341	1.1695	0.965937	2.38355	2.07795	2.72535	1.03317	12.1645	0.00104777	-1.15417	0.0684522	0.365902	0.791776	0.940056	0.589212
		342	1.30324	0.93897	2.072	2.97894	1.45848	1.06341	6.92621	0.00255974	-1.81293	1.04251	-0.910271	0.801536	0.945067	0.662846
		343	1.44128	0.934953	2.12052	2.06959	1.72714	1.06845	12.0951	0.00126587	-1.4946	1.16433	-2.19796	0.761474	0.950411	0.637685
		344	1.18691	0.96394	2.43575	1.979	2.96581	1.09383	12.5869	0.00100924	-0.283181	1.22393	0.529168	0.758115	0.940126	0.54811
		345	1.4588	0.938936	2.07578	2.61103	2.89399	1.15084	15.7707	0.00100512	-0.317831	1.85892	-1.53586	0.684909	0.950077	0.522094
		346	1.69528	0.947834	2.43832	0.842563	1.59333	1.08118	12.213	0.00182349	-1.91705	1.01955	-6.10676	0.695606	0.95535	0.556114
		347	1.21086	0.968254	2.40597	2.01293	2.86445	1.46129	12.3481	0.00128072	1.24618	1.97317	0.634801	-0.114185	0.940104	0.349697
		348	1.13626	0.971604	2.5315	2.12142	2.8063	2.10812	12.2091	0.00164289	1.81856	1.89304	0.89484	-2.8815	0.935518	0.155794
		349	1.44362	0.942853	2.12052	2.19872	2.83294	1.06635	12.095	0.00126587	-1.05083	1.25499	-1.64442	0.725208	0.95004	0.636606
		350	0.972866	0.950582	2.61771	2.99343	1.06922	1.01667	1.40506	0.00166165	-1.69907	-0.256897	0.844219	0.845203	0.922252	0.606066
		351	1.68553	0.942561	2.48027	0.843463	0.973874	1.00988	16.759	0.00103967	-1.7653	1.23926	-6.44644	0.715333	0.955437	0.502744
		352	1.69778	0.946881	2.43575	0.84281	2.98027	2.72534	12.2085	0.00110201	-0.300568	1.24743	-4.47877	0.32284	0.955054	-0.547705
		353	1.46509	0.943893	2.13467	2.11823	2.86083	4.51176	12.95	0.0010975	-0.32389	1.8612	-1.23723	0.292519	0.950162	-1.69649
		354	1.20983	0.967692	2.40543	2.01293	2.86445	1.49451	12.3522	0.00128236	0.577097	1.97275	0.603369	0.601964	0.940297	0.402287
		355	1.2031	0.96434	2.44153	2.10699	0.941839	1.18966	5.15047	0.00247434	-1.55966	0.243679	-0.16157	0.816747	0.940201	0.701391
		356	1.02395	0.976919	2.47249	2.95154	2.42514	1.00758	3.43433	0.00101707	-1.89056	0.357734	0.832756	0.83114	0.930405	0.581379
	4	357	0.94592	0.996514	2.73233	2.17424	1.67344	1.39434	1.42962	0.00100893	-0.811404	0.837742	0.950563	0.820431	0.921803	0.620423
		358	0.942172	0.967731	2.61785	2.95579	1.22615	1.60608	2.12466	0.0012832	-1.41757	0.877261	0.945322	0.831031	0.921231	0.641673
		359	0.949014	0.939801	2.63322	2.49759	1.7161	1.21941	1.80061	0.00212412	-1.89039	0.862584	0.932537	0.835025	0.916059	0.60175
		360	0.96837	1.02619	2.98709	1.49291	1.10651	1.64843	1.74506	0.00184008	0.247727	0.806548	0.955296	0.790615	0.917027	0.653372
		361	0.952391	0.997343	2.62794	0.815619	1.13584	1.81516	9.99499	0.00341045	0.249063	1.99375	0.960572	0.698869	0.806041	0.381597
		362	1.45624	0.944099	2.20774	1.81914	2.65903	1.0009	13.2253	0.0019041	-1.25885	1.96933	-1.52784	0.710249	0.950037	0.534443
		363	1.00165	0.965086	2.61422	2.3903	2.37558	1.48413	3.5808	0.00212306	-0.62971	1.90092	0.95064	0.786901	0.925091	0.571163
		364	1.29046	0.949485	2.1874	2.40368	1.85981	1.0172	8.18123	0.00184923	-1.73449	0.88587	-0.60442	0.798354	0.945074	0.666414
		365	1.29091	0.956842	2.21712	2.31179	1.86037	1.02183	11.5273	0.00194557	-1.98555	0.75501	-0.563886	0.790652	0.94517	0.604231
		366	0.982591	0.990898	2.63625	2.93604	1.0644	1.04988	3.58483	0.00180917	-1.65953	-0.12359	0.86241	0.842067	0.925738	0.583797
		367	1.30285	0.949932	2.21712	2.41514	1.86037	1.02183	6.44045	0.00193945	-1.98555	0.75501	-0.770237	0.800279	0.945412	0.700456
		368	1.68819	0.947564	2.40857	0.918947	1.17932	1.00234	11.8047	0.00201585	-1.13721	0.846803	-6.26673	0.710218	0.955347	0.527497
		369	1.00335	0.968424	2.61931	2.95331	2.8458	1.47979	2.10308	0.00127939	-1.41485	1.97762	0.94628	0.802173	0.925048	0.610157
		370	0.969342	0.962059	2.99435	2.99959	0.762	1.05289	1.73794	0.00182496	-1.22833	-1.54254	0.817644	0.8463	0.906199	0.566224
		371	0.982455	0.990608	2.64258	2.93814	1.0644	1.04985	3.58483	0.00182298	-1.84407	-0.84395	0.812493	0.845035	0.925772	0.567882
		372	1.28735	0.949605	2.18946	2.37929	1.8615	1.11048	11.4478	0.00185612	-1.73525	0.731172	-0.538261	0.787069	0.945228	0.608263
		373	1.04954	0.993835	2.74226	1.84772	2.77366	1.56456	9.84411	0.00125365	-1.42407	1.88871	0.925718	0.762592	0.930475	0.537293
		374	1.2903	0.949605	2.18755	2.37225	2.72565	1.02614	10.3788	0.00214414	-0.624834	0.718597	-0.261952	0.761261	0.945039	0.581289
		375	1.19899	0.965442	2.48729	1.77385	2.61279	1.01936	11.5157	0.0011476	-0.429233	1.90675	0.515044	0.752628	0.940029	0.53337
		376	1.04333	0.977619	2.41352	2.95637	2.88467	1.00915	4.1149	0.00124746	-0.76961	1.95239	0.911187	0.795735	0.930184	0.542845
		377	1.45958	0.940596	2.21672	1.84716	2.63232	1.00261	10.9024	0.00194451	-1.92123	1.97485	-1.70143	0.728111	0.950028	0.605949
		378	1.30019	0.949975	2.22106	2.40472	2.68212	1.02531	6.46874	0.00218185	-0.672846	0.911	-0.354525	0.770375	0.945056	0.657693
		379	0.993893	0.996507	2.71991	1.48497	1.13781	1.75764	10.057	0.00340734	0.194786	1.9279	0.960038	0.674498	0.915342	0.266229
		380	0.982777	0.984477	2.56433	2.5705	1.7994	1.40981	2.80821	0.00198158	-0.671682	0.924457	0.940208	0.820467	0.925895	0.606918
		381	1.20282	0.965447	2.41535	1.84503	2.66758	1.1337	6.54442	0.00136114	-1.56804	1.89252	0.404646	0.781051	0.940079	0.643534
		382	1.21246	0.970423	2.41147	1.94434	2.78515	1.77308	12.8776	0.00171564	1.04655	1.81425	0.630865	0.216451	0.940215	0.279041
		383	1.03727	0.985004	2.56488	2.55992	1.79701	1.2432	3.93571	0.00198158	-1.18334	0.960335	0.864088	0.820247	0.930006	0.612609
		384	1.29836	0.949615	2.22099	2.39125	2.83903	1.02172	6.43725	0.00185621	-0.664956	0.982755	-0.307837	0.767824	0.94501	0.662251
		385	1.40165	0.944782	2.18575	1.89553	0.825027	1.37843	16.6679	0.00112824	-1.83657	0.221755	-2.32139	0.76097	0.950077	0.527853
		386	1.02534	0.968061	2.41628	2.98115	1.77232	1.01703	3.65496	0.00256508	-1.96661	-0.606049	0.716578	0.841767	0.930515	0.576297
		387	1.0382	0.989518	2.72959	1.8917	2.66789	1.13982	3.99522	0.0011744	-0.677512	0.874784	0.899827	0.805889	0.930021	0.591366
		388	1.20313	0.958206	2.49576	1.7508	2.88101	1.05619	10.6014	0.00111496	-0.791961	1.94605	0.501646	0.759561	0.940109	0.570808
		389	1.68819	0.948173	2.40857	0.918947	1.28429	1.00234	14.7923	0.00230895	-1.13721	0.846803	-5.96588	0.693265	0.955408	0.41277
		390	1.21238	0.965258	2.4162	1.75983	2.73125	1.67158	13.0533	0.00116381	1.00029	1.90779	0.600081	0.313321	0.940198	0.363823
		391	1.09781	0.973859	2.47435	2.39447	1.7974	1.15947	4.47552	0.00192179	-1.64637	-0.0334225	0.563549	0.825569	0.935304	0.648646
		392	1.21336	0.951742	2.42222	2.03399	1.21378	1.04592	6.65897	0.00193469	-1.99996	0.815965	-0.132842	0.818618	0.941128	0.680791
		393	1.45958	0.943641	2.22745	1.72702	2.63232	1.0022	10.9024	0.00193573	-1.36932	1.97485	-1.62355	0.720149	0.95008	0.593043
		394	1.11279	0.977855	2.46019	2.35197	2.88692	1.67623	9.86566	0.00166305	-0.780751	1.92691	0.847798	0.735966	0.935222	0.493374
		395	1.04727	0.98162	2.5636	2.39344	2.88776	1.4601	2.10556	0.00103333	-1.96905	1.91684	0.90481	0.801585	0.930337	0.64341
		396	1.68819	0.947251	2.40857	0.918947	1.28429	1.00294	14.724	0.00230808	-0.695276	0.846803	-5.88089	0.686306	0.955388	0.39447
		397	1.11279	0.964182	2.46582	2.35423	2.7234	1.10732	9.83234	0.00164821	-0.789971	1.98463	0.81209	0.761107	0.935256	0.484599
		398	1.19899	0.965576	2.48729	1.77385	2.61361	1.00943	11.0998	0.00124944	-0.767435	1.90705	0.49641	0.76162	0.940083	0.54589
		399	1.20913	0.965259	2.41446	1.76157	2.88467	1.02432	13.1523	0.00212208	-0.400297	1.90832	0.524687	0.722631	0.940204	0.425765
		400	1.04333	0.977485	2.41352	2.95637	2.88383	1.01909	4.53083	0.00119103	-0.431408	1.95209	0.917917	0.78488	0.930057	0.522351
		401	1.20218	0.965447	2.4935	1.77916	1.78264	1.06411	6.54442	0.00112715	-1.56804	0.920949	0.135869	0.805938	0.940666	0.685438
		402	1.69876	0.945941	2.40857	0.845708	2.19059	1.02375	11.0496	0.00197347	-1.67273	0.926327	-5.7501	0.674188	0.955031	0.628746
		403	1.09781	0.97386	2.47435	2.39447	1.47355	1.15685	4.47552	0.0019269	-1.92353	-0.0334225	0.509151	0.832065	0.935323	0.660673
		404	1.03727	0.984636	2.56488	2.38884	1.7994	1.2501	4.35664	0.00198158	-1.18533	1.03445	0.867528	0.818209	0.930327	0.608063
		405	1.69425	0.94835	2.40923	0.878241	2.7689	1.05666	11.8781	0.00216662	-0.674655	0.929079	-4.97152	0.618868	0.95508	0.58391
		406	1.21081	0.964963	2.4909	1.77986	1.81039	1.03979	6.17383	0.00167296	-1.57113	1.93423	0.251841	0.795328	0.940201	0.650412
		407	1.20167	0.965275	2.40531	1.88131	2.66404	1.01936	11.5157	0.0011476	-1.56747	1.90617	0.421621	0.776409	0.940481	0.575177
		408	1.19899	0.965532	2.48729	1.75186	2.59917	1.01936	11.5157	0.0011476	-1.38194	1.90675	0.456069	0.772375	0.940255	0.570393
		409	1.46132	0.943799	2.21959	1.74376	2.73284	1.04318	16.9647	0.00190838	-0.675977	1.9847	-1.39825	0.670296	0.950247	0.412173
		410	1.11289	0.964182	2.46884	2.35422	2.89314	1.01962	3.91889	0.00165202	-1.93617	1.90566	0.745383	0.8028	0.935016	0.610106
		411	1.11279	0.962858	2.49346	2.35806	2.72221	1.03031	8.16188	0.00164872	-1.93519	1.92269	0.758182	0.791892	0.935167	0.547978
		412	1.11279	0.965264	2.46886	2.35422	2.91239	1.02556	6.50371	0.00123721	-1.9119	1.88379	0.752396	0.799098	0.935458	0.587782
		413	1.02534	0.968442	2.49044	2.93912	1.80865	1.0072	3.64019	0.00120023	-1.36166	-0.421222	0.76591	0.836637	0.930375	0.590783
		414	1.44062	0.946898	2.17861	1.82563	2.08758	1.08971	10.4997	0.00192703	-1.18428	0.848094	-1.94064	0.745782	0.950064	0.630743
		415	1.40097	0.944783	2.21268	1.86428	0.825027	1.06714	16.6559	0.00105088	-1.95295	0.432154	-2.3356	0.778031	0.950017	0.614869
		416	1.03811	0.999134	2.65759	1.7491	2.70111	1.64555	6.81529	0.00114895	0.430956	1.88629	0.954761	0.655772	0.927393	0.455553
		417	1.21772	0.967916	2.48704	1.70203	2.73052	1.67028	13.2677	0.00515791	-0.929028	1.9603	0.567688	0.661604	0.940062	0.288905
		418	1.20014	0.96195	2.22158	2.41623	1.28581	1.0064	4.53523	0.00190042	-1.92172	-0.852423	-0.410725	0.825035	0.940347	0.713408
		419	1.2055	0.958252	2.40937	1.82433	2.23351	1.04062	6.12139	0.00128746	-1.60932	1.91372	0.303147	0.793496	0.940005	0.655337
		420	1.66433	0.943798	2.42488	0.878241	0.689009	1.06062	11.882	0.00191865	-1.9128	0.904736	-6.48504	0.729388	0.955018	0.482938
		421	1.68452	0.947808	2.40898	0.918947	1.93133	1.00234	14.841	0.00220153	-1.17834	0.848426	-5.38327	0.668729	0.955284	0.490621
		422	1.45721	0.943799	2.21959	1.76543	2.73284	1.04284	16.9647	0.00164292	-0.675977	1.92174	-1.40183	0.679204	0.950208	0.446771
		423	1.2098	0.965569	2.49333	1.79166	1.78155	1.01891	3.81737	0.00163304	-1.9963	0.924293	0.0433161	0.811002	0.940365	0.708359
		424	1.2903	0.949605	2.18755	2.37225	2.72744	1.02614	8.27362	0.00184913	-1.73525	0.73118	-0.408192	0.782503	0.945069	0.657528
		425	0.972167	0.958204	2.99272	1.50659	1.10728	1.66257	1.433	0.0874115	-0.789768	1.90231	0.955772	0.798114	0.903868	0.695771
		426	1.04598	0.993598	2.74226	1.84864	2.77357	1.54069	9.84411	0.00125365	-0.821064	1.88145	0.938278	0.749415	0.930114	0.505541
		427	1.04947	0.99382	2.74344	1.81705	2.78092	1.56241	9.83836	0.0012364	0.207338	1.5974	0.945428	0.707777	0.930136	0.430885
		428	1.69425	0.94835	2.40923	0.878241	2.7689	1.06334	11.8781	0.00152957	-0.674655	0.937205	-5.07776	0.625562	0.955193	0.631085
		429	1.11101	0.965282	2.45744	2.3903	2.76938	1.64148	9.3786	0.0010984	-0.630416	1.90596	0.834464	0.750641	0.93534	0.543657
		430	1.68819	0.947574	2.40448	0.918947	1.28429	1.00234	12.0315	0.00201585	-1.13721	0.877879	-6.145	0.706432	0.955346	0.529708
		431	0.941913	0.962743	2.96701	2.9943	1.16574	1.05289	1.4258	0.00181515	-1.22833	-0.820078	0.909369	0.840593	0.908872	0.546899
		432	1.11602	0.9663	2.41443	2.53794	2.72665	1.02403	3.7215	0.00123976	-1.90341	1.90809	0.717017	0.806957	0.935377	0.624631
		433	1.02845	0.967067	2.48174	2.60745	2.05294	1.00381	4.45767	0.00196518	-1.92632	0.848581	0.838243	0.830709	0.930024	0.574757
		434	1.11748	0.960815	2.41352	2.50341	2.88467	1.02403	6.42679	0.00124037	-0.893935	1.90813	0.768885	0.786338	0.935593	0.566714
		435	1.11572	0.96647	2.48255	2.57175	2.09386	1.01616	3.91486	0.00120027	-0.841036	0.827359	0.630102	0.817376	0.935011	0.638089
		436	1.29577	0.949733	2.22096	2.4118	1.21378	1.04592	6.43292	0.00193752	-1.98555	0.75501	-0.944322	0.80803	0.945194	0.704347
		437	1.212	0.965233	2.41076	1.82203	2.27628	1.04973	6.24482	0.00220298	-1.37259	1.95478	0.332733	0.785496	0.940235	0.624033
		438	1.00468	0.984511	2.65985	1.97739	2.1006	1.71187	2.67849	0.00108347	-0.115257	1.90868	0.955024	0.765668	0.924613	0.596283
		439	1.09993	0.973916	2.47435	2.4259	1.85195	1.15947	4.47552	0.00198242	-0.820675	-0.0334225	0.606419	0.820905	0.935244	0.642448
		440	1.68476	0.948173	2.40857	0.918947	2.21975	1.00234	14.7923	0.0015979	-0.4051	0.767939	-5.17858	0.654206	0.95535	0.563052
		441	0.938397	0.974823	2.74554	2.97603	1.09705	1.22138	1.54117	0.00112517	-1.84937	-0.590922	0.898004	0.840218	0.920368	0.591069
		442	1.20612	0.970423	2.4134	1.94434	2.78515	1.77308	12.1358	0.00171564	-0.634758	1.90727	0.563897	0.702261	0.940384	0.450594
		443	0.974647	0.997876	2.60605	2.96589	1.811	1.07386	2.10592	0.0012506	-1.78979	0.874705	0.925067	0.834311	0.925084	0.578263
		444	1.19886	0.965859	2.49949	1.77391	2.75938	1.01936	10.5953	0.0011926	-1.23304	1.90228	0.485026	0.769823	0.940123	0.573459
		445	1.2029	0.965438	2.48692	1.76648	2.61222	1.53475	11.5432	0.00219769	-0.795121	1.97077	0.560043	0.717621	0.940067	0.470974
		446	1.44092	0.944782	2.18255	1.8223	2.04119	1.02761	16.6679	0.00103657	-1.95943	0.778142	-2.10937	0.758036	0.950667	0.639564
		447	0.97487	0.97273	2.60605	2.96589	1.81077	1.06361	3.60397	0.0012506	-1.79073	0.747227	0.918283	0.835647	0.925174	0.568122
		448	1.11233	0.977855	2.46019	2.35197	2.88692	1.67623	9.86566	0.002197	-0.780751	1.92717	0.853905	0.73058	0.935041	0.466404
		449	1.11411	0.965404	2.43475	2.34507	2.72296	1.10148	13.0533	0.00114008	0.974449	1.90847	0.859027	0.10663	0.935043	0.272652
		450	1.11449	0.968061	2.41628	2.98115	1.77232	1.00465	3.65496	0.00209243	-1.93501	-0.606049	0.375192	0.835205	0.935455	0.640609
		451	1.10967	0.964265	2.3963	2.9874	2.96805	1.01893	2.58999	0.00193751	-1.22666	0.89125	0.692395	0.811255	0.935052	0.62523
		452	1.11279	0.964216	2.46454	2.36462	2.8838	1.10955	9.86558	0.00121358	-0.380758	1.90386	0.822763	0.757142	0.935297	0.492817
		453	1.04412	0.991388	2.74111	1.84772	2.73689	1.56178	10.0904	0.0012364	-1.92741	1.90864	0.919401	0.772004	0.930298	0.549991
		454	1.10144	0.96916	2.38853	2.5422	2.66635	1.55435	9.83419	0.00114756	-1.56747	1.88155	0.8084	0.777084	0.935129	0.57492
		455	1.45966	0.943641	2.22745	1.7436	2.73349	1.00155	10.9057	0.00193573	-1.36932	1.98501	-1.58429	0.71653	0.950045	0.593247
		456	1.45624	0.944099	2.20774	1.81032	2.88457	1.0009	13.2253	0.00125275	-0.790176	1.9693	-1.47077	0.705217	0.950095	0.586877
		457	1.29397	0.949942	2.18705	2.49379	2.99973	1.29372	10.3093	0.00226862	-0.626729	0.947141	-0.156401	0.732849	0.945079	0.56005
		458	1.44165	0.946898	2.17611	1.82563	2.65405	1.02139	10.6287	0.00111606	-1.48254	0.8758	-1.86193	0.742625	0.950173	0.698614
		459	1.11748	0.962775	2.41325	2.59113	2.88467	1.13516	3.73787	0.00160116	-0.78765	1.90813	0.775186	0.784448	0.935042	0.606879
		460	1.68476	0.948173	2.40857	0.934615	2.21975	1.69309	15.2709	0.0015979	-0.141445	0.767939	-4.91297	0.542667	0.955303	0.163731
		461	1.68819	0.947296	2.40857	0.898571	1.31402	1.00294	14.724	0.00230808	-0.695276	0.931355	-5.83121	0.684455	0.955381	0.391097
		462	1.04693	0.993729	2.74148	1.81828	2.73057	1.66286	11.2343	0.00103671	-1.21638	1.97016	0.934188	0.75233	0.930362	0.523324
		463	1.3991	0.944783	2.21268	1.89148	0.825027	1.0692	16.6559	0.00105088	-1.95295	-0.0237473	-2.43397	0.781084	0.950058	0.630426
		464	1.21238	0.965226	2.41693	1.75983	2.73125	1.54497	13.0533	0.00116381	1.00029	1.92565	0.593899	0.319684	0.940181	0.377911
		465	1.04277	0.969725	2.4778	2.60863	2.91523	1.16351	3.65422	0.00120415	-0.679752	0.948685	0.885611	0.810177	0.930989	0.593548
	5	466	1.00153	0.961114	2.47344	2.98827	2.27736	1.77013	4.93053	0.00105757	0.277068	1.72886	0.95526	0.705195	0.925328	0.481523
		467	0.961824	0.989406	2.56246	2.9708	1.26612	1.52329	8.51401	0.00191483	-0.752385	0.532274	0.945342	0.806219	0.92507	0.527979
		468	1.04196	0.965907	2.45359	2.68939	2.79537	1.08023	5.55692	0.00161245	-0.0556962	1.4422	0.916649	0.78391	0.930103	0.501432
		469	0.926045	0.972405	2.8899	2.96781	1.00848	1.02347	1.05486	0.00117471	0.095378	-0.638528	0.94394	0.836707	0.913123	0.556388
		470	1.20275	0.957567	2.34858	2.53811	2.79507	1.34736	7.33003	0.00193605	-0.99263	1.46683	0.429726	0.767872	0.940137	0.602238
		471	0.939616	0.965295	2.97455	2.71968	0.932219	1.56264	1.20111	0.00249932	-0.211987	0.375161	0.951235	0.826914	0.910206	0.644311
		472	1.28248	0.949057	2.3238	2.05465	1.16357	1.00278	11.4052	0.0018293	-1.13782	0.381379	-0.691005	0.797264	0.945089	0.614393
		473	1.00217	1.04	2.94413	0.86795	2.28996	1.76971	4.97192	0.001	0.977632	1.68643	0.959851	0.457179	0.869248	0.569778
		474	0.939616	0.965295	2.99461	1.77898	1.2501	1.56264	1.20111	0.00195787	-0.229909	0.375161	0.952829	0.820384	0.915338	0.662113
		475	0.939411	1.01731	2.70973	2.83669	1.24229	1.53551	1.05966	0.00104506	-1.61154	0.63606	0.945441	0.831298	0.920715	0.641327
		476	0.953465	0.966607	2.75149	2.98914	1.2708	1.02524	1.11301	0.0021601	-1.14768	-0.275522	0.913078	0.840148	0.919401	0.573667
		477	1.19286	0.954663	2.36533	2.52548	2.24231	1.00287	6.27303	0.00159396	-1.09983	0.634459	0.234827	0.805843	0.940042	0.646327
		478	1.10652	0.961034	2.40175	2.75409	2.80492	1.91422	10.8104	0.00185883	-0.730746	1.53408	0.831392	0.740698	0.935236	0.465779
		479	0.999617	0.984968	2.58127	2.98477	1.33283	1.00473	1.41438	0.00482213	-1.79074	-0.413831	0.807982	0.845324	0.926696	0.592263
		480	1.44888	0.950755	2.36156	1.29762	2.18933	1.01196	13.3481	0.00193814	-1.6043	1.26183	-1.78241	0.73163	0.950301	0.582928
		481	1.45138	0.957375	2.33949	1.36095	2.25693	1.07108	14.6962	0.00107221	-0.912681	1.57237	-1.67726	0.721138	0.950151	0.604946
		482	0.935755	0.927544	2.93469	2.99239	0.98976	1.04778	1.5077	0.00100477	-0.985589	-0.0526851	0.932717	0.840012	0.902068	0.586816
		483	1.10884	0.961034	2.40598	2.68976	2.99785	1.79844	5.36848	0.00218875	-0.73404	1.53408	0.815196	0.765327	0.935031	0.57978
		484	1.43125	0.957226	2.35925	1.31857	1.16279	1.00441	13.2944	0.00175761	-1.66898	0.555115	-2.29687	0.775249	0.950248	0.612724
		485	0.937942	0.962871	2.93881	1.85753	0.703436	1.75287	7.78926	0.00197857	-0.0353217	0.261686	0.954921	0.798437	0.916283	0.569054
		486	1.29137	0.946807	2.26157	2.07686	2.93229	1.03815	9.55514	0.00174852	-0.968707	0.820847	-0.246607	0.763031	0.945157	0.624893
		487	1.28436	0.947744	2.34841	2.04354	1.2301	1.01803	8.44844	0.001	-1.65413	-0.959978	-1.12211	0.810115	0.945034	0.721839
		488	1.29425	0.947403	2.26903	2.06786	2.14101	1.01997	7.93423	0.00194003	-0.581055	0.712913	-0.441976	0.780343	0.94519	0.651706
		489	1.45138	0.957399	2.33949	1.36095	2.98008	1.05227	14.6387	0.00107221	-0.914658	1.57099	-1.4238	0.697822	0.95009	0.619269
		490	1.29662	0.953999	2.3157	1.95922	3	1.05459	12.6818	0.00184318	-0.0148833	1.1836	-0.0427734	0.721226	0.945065	0.508892
		491	0.953465	0.967046	2.75149	2.98911	1.31783	1.04127	1.19731	0.00206663	-0.0691938	-0.275522	0.933461	0.837454	0.918842	0.575513
		492	1.43557	0.957242	2.35874	1.31857	1.10979	1.00097	13.3134	0.00155324	-1.6368	-0.375959	-2.67493	0.780532	0.950604	0.65308
		493	1.45514	0.95038	2.35145	1.35999	2.97435	3.43382	19.3952	0.00197724	-0.226835	1.49531	-0.9741	0.370312	0.950325	-0.794028
		494	0.946652	0.96694	2.58761	2.98137	1.27247	1.03263	1.11352	0.0010236	-1.58178	0.915219	0.928394	0.835593	0.921488	0.593079
		495	1.45266	0.95038	2.35226	1.36006	2.9716	3.55449	19.2837	0.00197706	-0.226835	1.53864	-0.938502	0.358049	0.950244	-0.879249
		496	1.00151	0.98803	2.91246	1.80299	1.15267	1.78832	5.20428	0.00194449	0.155493	1.68333	0.955113	0.736835	0.923858	0.50129
		497	1.81043	0.928671	2.44088	0.740836	0.952818	1.03936	7.55063	0.00202136	-1.79833	0.397978	-9.8971	0.70695	0.955476	0.581412
		498	1.20141	0.955344	2.31506	2.59028	2.83617	1.00126	7.45587	0.00191765	-1.10348	1.41862	0.384601	0.786131	0.940432	0.587777
		499	1.45194	0.958305	2.35204	1.35993	2.87383	1.03231	17.2959	0.00106535	-0.533872	1.56422	-1.37539	0.687529	0.950102	0.562669
		500	1.2042	0.952924	2.47379	2.10654	1.27083	1.02113	7.63449	0.00181282	-1.77903	-0.243288	-0.16668	0.822777	0.940196	0.665994
		501	1.76344	0.957965	2.47662	0.738234	1.91285	1.00568	7.62459	0.0030032	0.298313	0.721147	-6.88701	0.637251	0.955068	0.578785
		502	1.10967	0.96104	2.38754	2.53924	2.98058	1.03181	4.15461	0.00217024	-0.783981	1.40465	0.758199	0.800081	0.935057	0.586887
		503	1.04004	0.966664	2.45685	2.59233	2.79537	1.40366	6.9204	0.00194397	-0.229037	1.4422	0.928269	0.772346	0.930042	0.499178
		504	1.29207	0.94684	2.2681	2.02591	2.93229	1.0376	9.55514	0.00174852	0.1118	0.820847	-0.150935	0.747522	0.945003	0.60058
		505	1.43295	0.957347	2.35965	1.31857	1.10571	1.00505	13.6416	0.00188414	-1.63833	0.701077	-2.27924	0.772299	0.950218	0.582156
		506	1.0413	0.962999	2.46301	2.99936	2.51808	1.01713	4.21165	0.00197743	-1.12095	1.43252	0.883349	0.815054	0.930131	0.55536
		507	0.913103	0.957813	2.97269	1.58349	0.542294	1.80631	3.53757	0.00304615	-0.0435221	0.281836	0.956497	0.808589	0.9049	0.648274
		508	1.18818	0.948735	2.36988	2.51227	2.04901	1.00431	7.73554	0.00150589	-0.993848	0.157619	0.175068	0.810881	0.940095	0.638208
		509	1.45062	0.95083	2.37487	1.28106	2.86824	1.00085	19.1994	0.00109441	0.0316347	1.55858	-1.28557	0.667572	0.950242	0.499729
		510	1.10747	0.966864	2.40079	2.72339	2.96884	1.00588	7.78118	0.00212072	-0.71739	1.53527	0.797527	0.780954	0.935162	0.49736
		511	1.44311	0.950392	2.35358	1.36378	2.97659	1.90981	19.1994	0.00109666	0.025453	1.55691	-1.04449	0.570493	0.950104	0.272089
		512	1.20308	0.95876	2.36943	2.16977	2.99718	1.36267	7.73498	0.00214396	0.0289995	1.59419	0.537636	0.730471	0.940144	0.53677
		513	1.11119	0.959892	2.40599	2.53807	2.96547	1.03917	5.68201	0.00218312	-0.731132	1.62154	0.782782	0.788522	0.935116	0.551636
		514	1.03947	0.960797	2.47262	2.69166	2.81939	1.05794	4.97459	0.00101011	-1.10522	1.42083	0.892218	0.811212	0.930153	0.564595
		515	1.10952	0.961034	2.40755	2.68976	2.97782	1.81087	14.1353	0.00111817	0.0248604	1.55725	0.854568	0.704526	0.93545	0.392765
		516	1.10661	0.961012	2.40608	2.75409	2.98093	1.91457	14.6293	0.00219132	-0.728525	1.61678	0.853687	0.71227	0.935092	0.371994
		517	1.45417	0.95038	2.35226	1.36006	2.97155	3.50926	19.2837	0.00197228	-0.226835	1.53865	-0.953194	0.362172	0.950282	-0.849109
		518	1.45273	0.95038	2.35073	1.34654	2.97813	1.11631	19.1994	0.002166	0.0255418	1.55992	-1.13291	0.618746	0.950103	0.339877
		519	1.4417	0.95038	2.30762	1.3592	1.81363	1.07108	14.5905	0.00107056	-1.86361	1.56204	-1.93456	0.754129	0.950137	0.630437
		520	1.45194	0.95038	2.35035	1.3592	2.9981	1.05865	19.1457	0.00215871	-0.0753559	1.53541	-1.14776	0.628075	0.950116	0.357756
		521	0.976353	0.98803	2.56048	2.99054	1.15267	1.76916	8.07234	0.00194449	-0.734683	1.35136	0.950586	0.78904	0.925324	0.499237
		522	1.28436	0.946865	2.34021	2.09052	1.11356	1.03728	14.308	0.00101539	-1.79344	0.720131	-0.75301	0.802697	0.945035	0.639947
		523	1.10668	0.961447	2.40555	2.74409	2.9249	1.01818	1.71597	0.00191481	-0.45804	0.598749	0.698866	0.810096	0.935077	0.640433
		524	1.04004	0.965975	2.45685	2.68934	2.79537	1.40366	14.0476	0.00192986	0.121629	1.4431	0.940073	0.704052	0.930066	0.273251
		525	1.45419	0.957241	2.35668	1.30504	2.23789	1.00438	13.3744	0.00190563	-1.63143	1.71097	-1.68933	0.726046	0.950047	0.563647
		526	0.97744	0.992748	2.5598	2.9894	2.60785	1.0272	1.67535	0.00193026	-0.748331	0.270132	0.930577	0.826406	0.926154	0.55183
		527	1.10555	0.961016	2.40933	2.55931	2.80495	1.02106	7.96051	0.00185574	-1.13026	1.51715	0.771777	0.791701	0.935203	0.526245
		528	1.04004	0.966664	2.46076	2.59233	2.79621	1.40366	17.7999	0.00106082	-0.229037	1.56474	0.935529	0.725273	0.930507	0.323674
		529	1.31035	0.948906	2.31447	2.03884	2.66017	3.42343	18.6151	0.00101013	1.39043	1.44916	0.123454	-0.342872	0.945389	-0.473522
		530	1.19341	0.951388	2.32251	2.5121	2.61832	1.07166	6.14888	0.00220452	-1.59807	1.27742	0.344081	0.795677	0.940046	0.625691
		531	1.20308	0.958657	2.36905	2.16143	2.98892	1.36267	19.5021	0.00214396	0.0289995	1.59419	0.597542	0.663141	0.940457	0.260626
		532	1.81084	0.928573	2.44088	0.740836	0.952818	1.03936	7.53125	0.00202136	-1.79833	-0.287014	-10.2356	0.711917	0.955545	0.610951
		533	1.77051	0.956434	2.47685	0.784938	2.97436	1.02794	7.76233	0.00105072	-0.252789	1.4836	-6.12594	0.585064	0.955404	0.68288
		534	1.43397	0.957243	2.34776	1.30865	1.19017	1.027	13.3134	0.00189949	-1.61423	0.730396	-2.24421	0.769439	0.950144	0.586485
		535	1.45197	0.95	2.35222	1.35466	2.97807	1.77604	19.1994	0.00108405	0.025453	1.68535	-1.11729	0.57769	0.950278	0.307396
		536	1.20455	0.955344	2.34525	2.56781	2.85569	1.00126	6.96216	0.00184054	-1.10134	1.62407	0.4025	0.784465	0.940119	0.594633
		537	1.20027	0.948972	2.35226	2.18056	2.97157	1.34569	19.2833	0.00197706	-0.218753	1.53864	0.56708	0.685212	0.94026	0.319327
		538	1.44311	0.950392	2.35358	1.31927	2.8516	1.90981	19.3439	0.00134079	0.025453	1.57249	-1.04272	0.565982	0.950018	0.20909
		539	1.20598	0.958274	2.35362	2.37686	1.16605	1.00551	5.57883	0.00213875	-1.76714	-0.163753	-0.262803	0.825025	0.941134	0.693175
		540	1.30484	0.951364	2.26877	2.00859	2.98861	1.7513	14.6535	0.00195129	-0.0193702	1.53202	0.0369498	0.649544	0.94528	0.347405
		541	1.03717	0.971149	2.48017	2.68434	2.97824	1.02093	4.139	0.00166465	-1.2659	1.57354	0.903521	0.807429	0.930193	0.549401
		542	1.03532	0.971517	2.44813	2.71188	1.79688	1	1	0.00165829	-1.67046	0.188074	0.755419	0.83523	0.930744	0.635024
		543	1.02924	0.971014	2.44791	2.7274	2.14443	1	1.04117	0.00166814	-0.798104	0.186252	0.822119	0.830031	0.930183	0.620486
		544	1.28456	0.947084	2.3306	2.00864	1.78983	1	9.65339	0.001712	-0.609412	-0.0821434	-0.571659	0.7913	0.945081	0.648165
		545	1.03733	0.972495	2.4758	2.69904	2.93316	1.01601	4.256	0.00175324	-0.971669	1.66689	0.911589	0.800424	0.930043	0.536792
		546	1.77146	0.95684	2.48502	0.797433	1.73404	1.00411	8.38627	0.00196077	0.0848724	1.99337	-6.67911	0.62538	0.95502	0.479395
		547	1.10652	0.961034	2.40175	2.75409	2.80492	1.63888	10.8104	0.00185883	-0.730746	1.53408	0.825386	0.751014	0.935225	0.480309
		548	1.29137	0.946807	2.26157	2.07686	1.89614	1.03815	9.55514	0.00174852	-0.968707	0.820847	-0.489191	0.78564	0.945229	0.636729
		549	1.20275	0.961254	2.3068	2.49736	2.99621	1.86699	14.5701	0.00192836	0.381397	1.50873	0.608475	0.63409	0.940384	0.289014
		550	1.45138	0.957375	2.33949	1.36095	2.25693	1.07108	14.6962	0.00107221	-1.88907	1.57237	-1.80346	0.735499	0.95026	0.637309
		551	1.20727	0.976326	2.35571	2.16374	2.98876	2.03276	18.8617	0.00161045	0.214013	1.56095	0.618204	0.625218	0.940095	0.222408
		552	1.29207	0.94684	2.2681	2.02591	2.93229	1.0376	11.7732	0.00174852	0.1118	0.820847	-0.124188	0.73679	0.945118	0.552066
		553	1.45519	0.95038	2.35145	1.35999	2.97417	3.44158	19.3964	0.0020228	0.0399943	1.56403	-0.920162	0.353756	0.950249	-0.852212
		554	1.29576	0.950343	2.30719	2.02272	2.80899	1.0376	9.52007	0.00174081	-0.0417172	0.713467	-0.210011	0.752347	0.945236	0.611087
		555	1.10712	0.962898	2.40587	2.68976	2.99785	1.75201	14.0535	0.0019926	-0.037186	1.50612	0.864519	0.699933	0.935124	0.33691
		556	1.29121	0.950368	2.26255	2.0668	2.97608	1.03815	9.10497	0.00168843	-1.26294	0.820847	-0.267508	0.767134	0.945164	0.640525
		557	1.03717	0.971017	2.48025	2.68418	1.81468	1.02093	4.139	0.00166495	-1.67109	1.5971	0.853969	0.824578	0.93012	0.590218
		558	1.43159	0.950413	2.35874	1.2891	1.28813	1.00434	12.5137	0.00178168	-0.799322	0.701042	-2.10998	0.76213	0.950082	0.601673
		559	0.946817	0.96694	2.58761	2.98349	1.28992	1.00889	1.11352	0.00118942	-1.42813	-0.191052	0.905238	0.840107	0.922603	0.580453
		560	1.76837	0.957362	2.48552	0.768849	1.73404	1.00417	8.36964	0.00188333	0.0848724	0.31452	-7.4483	0.656846	0.955897	0.634612
		561	1.30498	0.950428	2.26813	1.98546	2.99762	3.45478	14.6184	0.00217451	-0.0235381	1.52859	0.104554	0.506399	0.945268	-0.352181
		562	1.81007	0.93073	2.43976	0.740836	1.26918	1.03936	7.53125	0.00202136	-1.79144	-0.287014	-9.79721	0.701226	0.955623	0.641361
		563	1.29588	0.950377	2.26872	2.03067	2.61657	1.00084	9.55334	0.00104128	-0.572036	0.775235	-0.360934	0.770437	0.945477	0.661562
		564	1.28436	0.958695	2.33313	2.09052	1.11356	1.03728	14.308	0.00102892	-1.79344	-0.287666	-0.934943	0.805804	0.945221	0.656188
		565	1.45276	0.950035	2.34843	1.3592	2.97727	1.06456	19.1994	0.00109441	-0.777643	1.60401	-1.35866	0.676232	0.950437	0.528254
		566	1.03341	0.966541	2.47507	2.99279	2.0269	1.05918	3.96065	0.00210971	-1.05729	0.318369	0.827976	0.828441	0.930485	0.586573
		567	0.937723	0.927544	2.91972	2.99372	1.16635	1.15786	1.5077	0.00208949	-0.209543	0.0821915	0.946548	0.836538	0.9022	0.593961
		568	1.10055	0.961447	2.40555	2.75024	2.27325	1.01818	4.05854	0.00191539	-1.10174	0.582831	0.655235	0.820385	0.935163	0.6203
		569	1.45138	0.957375	2.3398	1.36095	2.98595	1.07108	16.3915	0.00104175	-0.856283	1.57237	-1.39228	0.691608	0.950151	0.594459
		570	1.77134	0.956364	2.35262	0.779302	2.87383	1.02269	12.7347	0.00105636	-0.563185	1.5269	-6.29172	0.59155	0.95505	0.609158
		571	1.45215	0.950068	2.36199	1.29765	2.87304	1.00083	19.1629	0.00163601	0.171697	1.55855	-1.21136	0.645066	0.950158	0.406117
		572	1.20275	0.958877	2.35223	2.1661	2.99713	1.34981	14.5701	0.00192629	0.381397	1.53467	0.585186	0.666775	0.940405	0.358022
		573	1.10432	0.961034	2.40245	2.74195	2.80492	1.91457	10.8104	0.00219132	-0.728366	1.53408	0.839166	0.738095	0.935011	0.448111
		574	1.75781	0.953931	2.47	0.796268	1.27085	1.03231	12.8673	0.00184478	-1.0482	0.707611	-7.55724	0.682005	0.956329	0.487268
		575	1.20308	0.965837	2.31157	2.50113	2.99625	1.36267	10.7765	0.00214841	0.0289995	1.54615	0.551346	0.715448	0.940112	0.452662
		576	1.03678	0.966091	2.45685	2.68934	2.71155	1.43596	14.0476	0.00192986	0.121629	1.02122	0.930454	0.736708	0.930243	0.345187
		577	0.978323	0.964597	2.45352	2.99897	2.26105	1.01972	1.99583	0.0018389	-0.837416	0.666566	0.925467	0.830388	0.925003	0.569138
		578	1.75781	0.948635	2.46697	0.729563	1.27085	1.03198	7.72718	0.00189011	-1.05221	0.155697	-8.17832	0.697336	0.955396	0.643339
		579	1.20308	0.958657	2.36905	2.18366	2.98892	1.36267	6.20278	0.00215587	-0.97969	1.59333	0.462317	0.762208	0.940262	0.615304
		580	1.77051	0.958288	2.47459	0.784938	2.97436	1.02794	17.0429	0.00106602	-0.252789	1.56594	-5.84761	0.556041	0.956051	0.531299
		581	1.45194	0.95038	2.35326	1.35993	2.87383	1.03231	12.7347	0.00106535	-0.533872	1.57289	-1.45441	0.700076	0.950171	0.6318
		582	1.45514	0.950288	2.35145	1.35555	2.97435	3.43382	19.9187	0.00198635	-0.226835	1.49531	-0.968756	0.366964	0.950339	-0.809618
		583	1.20029	0.948972	2.35226	2.18056	2.97157	1.34569	19.2833	0.00197706	-0.218753	1.59441	0.573549	0.683598	0.94022	0.31408
		584	1.09794	0.970859	2.46188	2.69553	1.89566	1	6.39341	0.00168969	-1.00956	-0.195284	0.592839	0.825122	0.935049	0.592595
		585	1.28391	0.949057	2.30963	2.056	2.67794	3.44959	19.1288	0.00101063	-0.211773	1.07588	0.0668785	0.555751	0.945034	-0.195009
		586	0.97744	0.967235	2.56753	2.98837	1.76776	1.02972	1.9142	0.00171022	-0.972011	0.268803	0.910139	0.835039	0.925401	0.583431
		587	0.988301	0.984614	2.58127	2.98477	2.93898	1.00568	1.30798	0.00228999	-0.682232	0.693069	0.936328	0.823037	0.926114	0.549714
		588	1.75781	0.960914	2.47287	0.78349	1.27085	1.00566	13.9032	0.0018935	-1.65337	0.707611	-7.61616	0.692171	0.95618	0.491928
		589	1.76837	0.957363	2.48934	0.766962	2.25802	1.00516	8.36964	0.00188605	0.0848724	1.63694	-6.36034	0.612085	0.955293	0.575995
		590	1.4542	0.95038	2.30759	1.35904	1.81947	1.00436	14.5905	0.00107056	-1.87975	1.56204	-2.09631	0.755671	0.950544	0.638024
		591	1.20027	0.955547	2.35226	2.18056	2.97258	1.00176	8.79847	0.00191779	-0.218753	1.53689	0.491056	0.758381	0.940233	0.527477
		592	1.29207	0.94684	2.2681	2.02591	2.93229	1.03526	9.55327	0.00174852	-0.59156	0.820847	-0.216032	0.758594	0.945113	0.618688
		593	1.29914	0.947344	2.27111	2.10355	2.81604	1.08928	14.3277	0.00103045	0.00350646	1.53679	-0.092581	0.728906	0.945224	0.539275
		594	1.20027	0.948728	2.3519	2.18056	2.91838	1.34102	19.2833	0.00150278	-0.218753	1.62466	0.557688	0.695746	0.940338	0.351441
		595	1.10954	0.96104	2.3817	2.70136	2.95187	1.03181	4.15461	0.00191446	-1.53779	1.40465	0.724609	0.806685	0.935332	0.600781
		596	1.19159	0.951388	2.32132	2.59014	1.98309	1.00006	8.55294	0.00219559	-1.57134	1.28509	0.280707	0.800932	0.940066	0.582061
		597	1.31035	0.948906	2.31447	2.03884	2.66017	3.42343	18.4913	0.00101013	1.39043	1.53274	0.137749	-0.357635	0.94533	-0.487159
		598	1.76344	0.958012	2.47394	0.740367	1.91285	1.00568	7.62459	0.00292945	0.298313	0.254934	-7.10582	0.64285	0.955227	0.61183
		599	1.10177	0.966544	2.36587	2.96184	1.29386	1.03444	6.36282	0.00172589	-1.80085	0.571802	0.508589	0.831506	0.935755	0.633347
		600	1.75781	0.962365	2.45782	0.768851	1.27085	1.03143	14.0079	0.00188542	-1.0482	0.707611	-7.50091	0.678191	0.956093	0.451437
		601	0.975957	0.96694	2.58595	2.98161	1.78092	1.00722	1.94548	0.00273234	-1.5816	-0.343275	0.872372	0.84118	0.925223	0.555383
		602	0.953993	1.0181	2.70211	2.83669	1.28817	1.53591	1.70997	0.00104506	-0.3119	0.627612	0.950955	0.818725	0.920743	0.624988
		603	1.20526	0.959848	2.3476	2.17674	2.98876	1.36907	6.67191	0.00210315	-0.0869216	1.53597	0.498673	0.742567	0.940269	0.574555
		604	1.3018	0.95038	2.30692	1.98356	2.97605	1.01361	19.3868	0.00112454	0.201459	1.57228	-0.00165811	0.689231	0.945308	0.403264
		605	1.10056	0.960849	2.40136	2.72294	2.2183	1.01948	6.48608	0.0010401	-0.95096	0.710342	0.666675	0.817737	0.935515	0.609407
		606	1.28938	0.947306	2.26903	2.02272	2.18058	1.03716	9.55514	0.00173038	-0.581055	0.712197	-0.378468	0.777322	0.945114	0.631283
		607	1.18818	0.948735	2.26976	2.51013	1.33674	1.00312	7.73554	0.00174828	-0.951608	0.200373	-0.0041	0.816546	0.940637	0.654346
		608	1.30396	0.951381	2.26157	2.07686	2.93229	1.03815	9.55514	0.00194441	-0.00183385	1.49917	-0.104066	0.733431	0.945041	0.557193
		609	1.7234	0.950428	2.35656	0.904778	2.84173	1.72838	14.6535	0.00104099	-0.0294841	1.53202	-5.03458	0.471377	0.955464	0.170043
		610	1.4417	0.95038	2.30762	1.39809	2.99263	1.07108	14.5905	0.00107029	-1.86361	1.52615	-1.4828	0.715074	0.950125	0.6482
		611	1.45197	0.95	2.35242	1.35466	2.97807	1.03112	19.0847	0.00108405	0.025453	1.76654	-1.21463	0.656479	0.950205	0.483841
	6	612	1.11041	0.977003	2.30242	2.89152	1.2829	1.14731	6.33304	0.00123126	-1.99014	-0.76724	0.276824	0.835067	0.936459	0.663623
		613	0.980528	0.976953	2.51433	2.93606	1.77181	1.24139	2.96172	0.0017926	-1.9534	1.03248	0.917671	0.835401	0.926195	0.602129
		614	0.946296	0.895292	2.53957	2.99813	1.52226	1.43857	1.57671	0.00123835	-1.89656	0.744964	0.922945	0.840291	0.901857	0.651775
		615	1.71212	0.926149	2.13113	1.28168	1.60373	1.14543	8.09456	0.00101091	-1.77781	1.04047	-6.987	0.691916	0.955046	0.6155
		616	0.977751	0.995596	2.61949	2.8947	2.1074	1.24859	1.44194	0.00102549	-0.0357116	0.292516	0.942368	0.822715	0.925065	0.606964
		617	1.20196	0.966703	2.2642	2.8109	2.96071	1.60957	10.8601	0.00113464	-0.427277	1.90077	0.54251	0.725277	0.940018	0.519949
		618	0.939014	0.9754	2.55822	2.94838	1.52947	1.24019	1.58618	0.00179002	-1.88779	0.718393	0.936572	0.835004	0.922041	0.602095
		619	1.10528	0.961424	2.51056	2.29045	1.3554	1.1339	6.333	0.00103939	-1.77555	1.06037	0.57305	0.825453	0.935091	0.656625
		620	0.981228	0.979236	2.62154	2.82414	2.05466	1.2958	3.12948	0.00113703	-0.441214	0.857802	0.945173	0.818933	0.925429	0.581701
		621	0.977751	0.995596	2.61949	2.89932	2.1074	1.24859	1.44194	0.00102549	-1.90782	0.970621	0.930756	0.831607	0.925223	0.605426
		622	1.05555	0.989357	2.51272	2.87711	1.10302	1.00342	4.19336	0.0015546	-1.9517	-0.0352201	0.640326	0.840434	0.931033	0.629483
		623	1.20229	0.944416	2.27252	2.81142	2.87744	1.12161	6.09754	0.00173613	-1.83025	1.72525	0.34946	0.790489	0.940261	0.637962
		624	0.980528	0.976953	2.51433	2.92637	1.7764	1.13108	1.97496	0.00104421	-1.95199	-0.939932	0.801501	0.845102	0.927297	0.586741
		625	1.71868	0.92486	2.14396	1.24107	2.90194	1.12125	18.3862	0.00113166	-1.93055	1.99131	-5.3677	0.612709	0.955157	0.496826
		626	1.30816	0.943262	2.1819	2.96407	1.48759	1.14021	7.58432	0.00177416	-1.98905	1.00732	-0.896808	0.799883	0.945449	0.67465
		627	0.929937	0.975756	2.53051	1.35881	1.97972	1.49998	1.16839	0.00128254	0.27471	0.973294	0.955967	0.791821	0.876828	0.644934
		628	1.73232	0.924526	2.12147	1.2722	2.15618	1.08885	19.7318	0.00101772	-1.92171	1.93758	-6.21745	0.648695	0.955387	0.439049
		629	1.29961	0.938196	2.1538	2.88093	2.98364	1.26009	8.13191	0.00108345	-1.56198	1.90393	-0.226506	0.757371	0.945056	0.652172
		630	0.958911	0.976587	2.47559	1.42665	2.47592	1.50974	1.07108	0.00100028	0.307493	1.0142	0.955019	0.788521	0.888445	0.646682
		631	1.41308	0.937958	2.04124	2.80177	1.37833	1.22965	17.3138	0.00101637	-1.81743	0.739625	-2.16363	0.76512	0.950037	0.566789
		632	1.30814	0.939169	2.14128	2.93694	1.76502	1.12986	7.36299	0.00211125	-1.95301	1.42934	-0.723229	0.7937	0.945518	0.653271
		633	0.938523	0.995212	2.56332	2.94656	1.52776	1.43854	1.18211	0.00101565	-0.53258	0.744964	0.9507	0.823486	0.921567	0.620622
		634	1.3005	0.948239	2.14124	2.98621	2.87758	1.35298	10.8601	0.00114001	-1.45785	1.91499	-0.189731	0.747967	0.945148	0.604257
		635	1.41701	0.938739	2.08472	2.81894	1.38769	1.15982	13.2047	0.00100018	-1.8759	-0.807952	-2.70483	0.780817	0.950006	0.679617
		636	1.20196	0.966703	2.2642	2.8109	2.96071	1.23443	11.224	0.00101533	-0.427277	1.92018	0.512431	0.745415	0.940022	0.540289
		637	1.2183	0.974922	2.63701	1.40269	2.88309	1.52926	10.3517	0.00150276	1.70795	1.39379	0.599547	-0.803232	0.940064	0.464587
		638	1.42187	0.937958	2.02396	2.80177	1.77801	1.22965	16.2208	0.00101685	-1.81743	0.739625	-2.10213	0.760034	0.950123	0.603645
		639	1.30534	0.940632	2.19093	2.95089	2.93625	1.26474	18.5606	0.00120489	-0.0136523	1.91834	-0.00779754	0.677402	0.945044	0.364233
		640	1.12373	0.975949	2.50697	2.27094	2.91802	2.15951	18.6747	0.00124578	0.210628	1.87837	0.879051	0.60247	0.935528	0.155526
		641	0.951049	0.939299	2.51509	2.92764	1.38284	1.16647	1.64932	0.00208011	-1.8757	-0.786851	0.844118	0.845402	0.918518	0.59141
		642	1.20234	0.943515	2.26358	2.81493	2.09333	1.12167	6.09754	0.00173613	-1.96155	1.72282	0.217534	0.805506	0.940247	0.653548
		643	1.11442	0.976981	2.47585	2.21536	2.90287	1.53814	10.8363	0.00149862	-0.427376	1.96925	0.855119	0.727143	0.935358	0.463898
		644	1.72445	0.924803	2.12147	1.2719	2.98632	1.19125	19.1374	0.00100342	-0.00483136	1.94388	-5.07846	0.550182	0.955017	0.36939
		645	1.29838	0.938316	2.14516	2.91438	2.97544	1.13631	8.211	0.00214432	-1.97215	1.75781	-0.248003	0.765337	0.945004	0.621311
		646	1.04514	0.977469	2.50286	2.75427	1.8129	1.22342	3.43162	0.00175623	-1.94832	-0.063781	0.733943	0.83538	0.931621	0.634245
		647	1.45452	0.946614	2.38741	1.28928	2.7723	1.59106	17.7981	0.00114197	-0.464649	1.97811	-1.2162	0.618741	0.950168	0.388812
		648	1.11444	0.976983	2.47585	2.21536	2.90287	1.53802	10.8363	0.00107731	0.0764913	1.96798	0.865359	0.707295	0.93526	0.445489
		649	1.00936	0.978117	2.52098	2.31454	2.81741	1.53495	5.79515	0.00104755	0.237818	1.86039	0.95551	0.708394	0.926155	0.459757
		650	0.940406	0.9116	2.51018	2.87312	1.45091	1.44249	4.65842	0.00105632	-1.81915	-0.00622525	0.903081	0.840743	0.908087	0.618191
		651	1.08654	0.963461	2.27638	2.99503	1.52627	1.13943	8.08934	0.00101728	-1.65677	-0.415359	0.479713	0.832116	0.935124	0.637629
		652	1.44631	0.938116	2.01741	2.97057	2.90194	1.12312	18.5729	0.00114053	-1.57819	1.98956	-1.51364	0.708331	0.950033	0.500221
		653	1.29568	0.943502	2.14165	2.99874	2.49494	1.18537	8.36799	0.00114048	-1.5835	1.53463	-0.379419	0.775978	0.94515	0.663032
		654	0.972616	0.940245	2.47398	2.92717	1.77358	1.23089	1.99064	0.00101679	-1.97863	-0.680232	0.816571	0.845235	0.921692	0.611147
		655	1.44636	0.92486	2.01948	2.82736	2.89939	1.1215	16.5541	0.00103202	-0.147841	1.97541	-1.41674	0.685562	0.950032	0.493495
		656	1.45174	0.94377	2.37609	1.38533	2.93996	1.08397	18.4935	0.00113444	-0.473821	1.82765	-1.25276	0.665894	0.950048	0.503543
		657	1.45837	0.946054	2.39122	1.28928	1.96367	1.10293	10.8682	0.00170526	-1.80652	1.87917	-1.89032	0.738638	0.950113	0.617392
		658	1.11442	0.976036	2.47585	2.16035	2.90287	1.17455	10.8363	0.00149862	-0.427376	1.96925	0.836934	0.742045	0.935378	0.456536
		659	0.976187	0.977507	2.51479	2.97092	1.76216	1.35402	2.91671	0.0017926	-1.96461	1.75246	0.937012	0.826494	0.925036	0.608584
		660	1.3005	0.948239	2.14381	2.98596	2.87758	1.43329	10.8601	0.00119619	-1.45672	1.91499	-0.173903	0.742686	0.945136	0.591772
		661	1.10912	0.977003	2.38586	2.81914	2.71401	1.11597	6.35221	0.00124475	-1.90862	1.82814	0.749221	0.803205	0.935035	0.600572
		662	1.30547	0.941011	2.1806	2.97517	2.95354	1.26675	16.49	0.00120662	-0.158924	1.97288	-0.0293325	0.692057	0.945116	0.421128
		663	1.30376	0.943618	2.18049	2.9748	2.94164	1.34007	19.7704	0.001199	-0.0355389	1.99715	0.0316808	0.663906	0.945044	0.323041
		664	1.30648	0.941684	2.14423	2.99986	2.84649	1.2666	11.156	0.00211013	-0.334587	1.8281	-0.108962	0.717228	0.945196	0.481556
		665	1.30547	0.946455	2.14644	2.94686	2.93625	1.26911	18.5833	0.00220647	-0.00947059	1.91834	0.0459071	0.654153	0.945054	0.241963
		666	1.20196	0.942109	2.26561	2.81199	2.95435	1.12118	8.43934	0.00101506	-0.414083	1.91814	0.462372	0.761919	0.940051	0.579355
		667	1.19521	0.946536	2.27206	2.97356	2.83444	1.13478	8.93765	0.00102371	-1.37221	1.90982	0.432803	0.782213	0.940048	0.610709
		668	1.30534	0.940632	2.19093	2.95126	2.92893	1.26474	18.5606	0.00101355	-0.0136523	1.91834	-0.0286618	0.683975	0.94508	0.399988
		669	1.30376	0.940727	2.18277	2.9748	2.94164	1.32986	19.7704	0.001199	-0.0360286	1.99543	0.0269792	0.665314	0.94505	0.32572
		670	1.44631	0.92486	2.01741	2.82736	2.97698	1.1215	18.8576	0.00101761	-0.0796034	1.9754	-1.35551	0.671663	0.950057	0.444931
		671	1.04647	0.979627	2.56237	2.3735	2.76966	1.19277	3.33098	0.00101118	0.105487	1.07139	0.909921	0.791108	0.930472	0.578391
		672	1.76099	0.925449	2.1484	1.22575	0.950126	1.13633	8.09456	0.00176177	-1.76976	-1.04326	-9.57815	0.706261	0.95575	0.566657
		673	1.09489	0.976462	2.51179	2.15943	1.93804	1.16213	7.60879	0.00127895	-1.86935	1.00825	0.691879	0.816154	0.935082	0.618381
		674	1.04512	0.976933	2.50523	2.95004	1.77181	1.24039	3.43179	0.0017926	-1.95354	1.05661	0.817661	0.830419	0.930492	0.632985
		675	0.943994	0.908136	2.50657	2.99845	1.58253	1.1702	1.67955	0.00179474	-1.89244	-0.659049	0.85613	0.845871	0.90781	0.588164
		676	1.19521	0.946217	2.27206	2.97395	2.63007	1.13867	8.7987	0.00102387	-1.37221	1.90982	0.406827	0.785492	0.940026	0.614982
		677	1.18801	0.940361	2.27527	2.91849	1.52018	1.16431	8.16426	0.00101104	-1.84982	0.927424	0.0681105	0.817001	0.940126	0.678145
		678	1.31044	0.946245	2.14644	2.94696	2.93609	1.51079	18.4384	0.00220647	-0.00947059	1.98987	0.053872	0.632582	0.945207	0.191648
		679	0.95499	0.979236	2.61719	1.08199	2.05466	1.53937	2.04655	0.00113703	1.63327	0.857802	0.960041	-1.29668	0.862556	0.649597
		680	1.71212	0.924071	2.15055	1.28168	1.36348	1.13603	8.09456	0.00103749	-1.96374	1.00159	-7.26618	0.703462	0.955104	0.605446
		681	1.73232	0.92486	2.1424	1.2722	2.15618	1.08885	19.7318	0.00101872	-1.58202	1.91768	-6.12568	0.641133	0.95541	0.424779
		682	0.937655	0.971584	2.50681	1.01672	1.77174	1.54669	2.06403	0.00101469	1.48381	0.878624	0.96025	-0.757785	0.831888	0.663615
		683	1.04422	0.979055	2.52081	2.76262	2.9174	1.54049	3.83974	0.00117871	0.0971186	1.11547	0.924136	0.777328	0.930164	0.577646
		684	1.28939	0.945506	2.14775	2.75349	1.09877	1.11917	8.211	0.00119685	-1.97684	-1.00959	-1.38247	0.809311	0.945837	0.71958
		685	1.0286	0.971673	2.45042	2.93997	2.25451	1.33364	7.75531	0.00106724	-1.69197	1.14086	0.882344	0.816887	0.930528	0.587208
		686	1.44636	0.92486	2.01948	2.82736	2.89939	3.37545	16.5541	0.00103202	-0.147841	1.97541	-1.09653	0.438526	0.950114	-0.760621
		687	1.30545	0.943526	2.18663	2.97743	2.94664	2.75449	19.8379	0.00120489	-0.0360286	1.84038	0.112161	0.557255	0.945151	-0.099148
		688	1.11442	0.976981	2.47585	2.21536	2.90287	2.27291	19.3301	0.00149862	-0.427376	1.96925	0.878551	0.654349	0.935511	0.234423
		689	1.44631	0.938377	2.01741	2.93262	2.9208	1.11997	16.3551	0.00101772	-1.61989	1.9754	-1.5706	0.720671	0.950015	0.570687
		690	1.19135	0.945599	2.25046	2.92958	2.01833	1.08294	8.3166	0.00103942	-1.80667	1.10928	0.173751	0.8116	0.940517	0.658646
		691	1.45089	0.944373	2.37609	1.37157	2.93713	1.08252	18.4935	0.00119024	-0.473821	1.82765	-1.23691	0.664184	0.950063	0.493705
		692	1.29639	0.939936	2.13258	2.97983	2.09095	1.15313	8.90584	0.00102369	-1.93445	1.87639	-0.472595	0.785582	0.945106	0.659474
		693	1.04209	0.977496	2.50291	2.84995	2.82652	1.22831	7.65887	0.00130435	-1.3963	1.84848	0.916245	0.789433	0.930491	0.531663
		694	1.02788	0.977111	2.514	2.9275	2.80333	1.15362	7.57865	0.0010633	-1.80612	1.15975	0.895153	0.812146	0.930039	0.55045
		695	0.956946	0.987425	2.47634	1.52333	2.47592	1.52145	1.07108	0.001067	0.307493	1.13497	0.95578	0.78162	0.893873	0.635497
		696	1.05027	0.968843	2.653	2.161	2.92066	1.36955	8.06137	0.00100852	-0.630784	1.86644	0.930629	0.76614	0.930127	0.534262
		697	1.18761	0.963553	2.27401	2.93347	1.54249	1.16431	8.47949	0.00101104	-1.76463	-1.00235	-0.191183	0.820379	0.940805	0.680407
		698	0.978162	0.991381	2.45835	2.1817	2.48006	1.44882	1.07108	0.0010067	0.303039	1.40847	0.955149	0.766353	0.916267	0.613698
		699	0.994625	0.993818	2.50354	2.93562	2.67773	1.37607	5.87523	0.00101803	-0.050968	1.06645	0.950474	0.789032	0.927009	0.515784
		700	1.04857	0.975352	2.50174	2.94582	2.91793	2.12199	18.8217	0.00101535	0.371075	1.83457	0.951665	0.521658	0.93035	0.0506149
		701	1.09489	0.976462	2.51179	2.15943	1.93804	1.14525	8.10905	0.00127318	-1.77874	1.00825	0.696741	0.813641	0.935102	0.608787
		702	1.45748	0.946728	2.38445	1.32143	2.74802	1.3499	19.0079	0.00129466	0.382264	1.95535	-1.14389	0.593722	0.950085	0.333611
		703	1.09916	0.978594	2.51185	2.1867	2.88879	1.15279	7.44454	0.00101838	-1.92613	1.39407	0.767373	0.799783	0.935013	0.60021
		704	1.20196	0.961253	2.2642	2.8109	2.96066	1.23443	11.224	0.00101533	0.00939522	1.87236	0.527881	0.730384	0.940223	0.51198
		705	1.45748	0.952043	2.38445	1.32143	2.93576	1.63617	16.9989	0.00103543	0.303225	1.95535	-1.10962	0.57982	0.950075	0.359082
		706	1.44631	0.92486	2.01741	2.82736	1.86388	1.1215	18.8576	0.00101763	-1.77103	1.99014	-2.00746	0.742734	0.950365	0.495419
		707	1.29568	0.943502	2.14165	2.99874	2.49494	1.18354	10.8438	0.00148304	-1.5835	1.53463	-0.324308	0.770381	0.945259	0.606975
		708	1.03719	0.976886	2.51891	2.83154	2.89309	1.35621	10.4164	0.00130033	-0.393954	1.42932	0.934659	0.762957	0.930174	0.450576
		709	0.903835	0.939933	2.07124	1.01672	1.77174	1.54669	1.8717	0.00113591	1.21062	0.843807	0.959886	0.0972284	0.749415	0.677138
		710	0.94638	0.973008	2.60231	2.86454	1.59935	1.44827	1.09421	0.00124373	-1.49672	1.03405	0.945981	0.831038	0.921784	0.630799
		711	0.937898	0.947062	2.54073	2.96973	1.54765	1.52941	1.18211	0.00147069	-1.8952	0.935966	0.941083	0.83501	0.917316	0.642747
		712	1.30816	0.939188	2.18013	2.96407	1.48759	1.14021	7.58432	0.00177416	-1.99345	1.00732	-0.907336	0.800257	0.945527	0.675513
		713	1.10339	0.976852	2.51185	2.1867	2.88837	1.11972	10.3839	0.00102244	-0.389069	1.39022	0.81944	0.772918	0.935128	0.52193
		714	1.11442	0.976036	2.47585	2.16035	2.90287	1.17638	8.3605	0.00115607	-0.427376	1.96925	0.825596	0.760121	0.935316	0.534247
		715	1.3005	0.94807	2.14755	2.83432	2.89919	1.1049	17.0056	0.00103265	-0.128506	1.97329	-0.0439396	0.708157	0.945088	0.448328
		716	1.73232	0.92486	2.12147	1.2722	2.21029	1.08961	13.5927	0.00111802	-1.56184	1.87179	-6.26761	0.650586	0.955204	0.516318
		717	1.4212	0.937958	2.02412	2.80769	1.81186	1.3611	16.2556	0.0010473	-1.91808	0.739625	-2.05657	0.751177	0.950103	0.571611
		718	1.19521	0.946973	2.27206	2.94266	2.92095	1.33645	8.13773	0.00102371	-1.38344	1.90783	0.455541	0.773166	0.940036	0.624778
		719	1.04283	0.977479	2.50193	2.83176	1.85706	1.45731	3.91745	0.00175734	-1.94832	1.03845	0.836213	0.825518	0.930782	0.641937
		720	1.44636	0.92486	2.01948	2.82736	2.82685	1.12075	16.5977	0.00101791	-1.98112	1.97541	-1.67763	0.728711	0.950296	0.581456
		721	1.10489	0.962769	2.51056	2.30234	2.6544	1.1339	6.53764	0.00103552	-1.48633	1.05035	0.718333	0.805966	0.935149	0.616622
		722	1.10582	0.974732	2.49847	2.14521	2.84467	1.23043	7.72684	0.00110775	-1.38784	1.83733	0.802752	0.785839	0.935133	0.590969
		723	1.2993	0.94047	2.19016	2.88093	2.98364	1.25994	18.2779	0.00108345	-1.56916	1.90393	-0.114345	0.728149	0.945221	0.499125
		724	1.30093	0.940648	2.17495	2.9529	2.94432	1.32525	10.1887	0.001	-1.76746	2	-0.205447	0.751992	0.945126	0.630771
		725	1.09559	0.97702	2.48237	2.20068	1.40444	1.1747	7.63463	0.00127895	-1.777	1.09677	0.640694	0.821321	0.935044	0.631797
		726	1.71212	0.926149	2.13113	1.28168	1.37827	1.14269	8.09261	0.00101111	-1.77781	1.03813	-7.21966	0.698105	0.955086	0.59569
		727	1.44631	0.938377	2.01741	2.81121	2.9549	1.12004	18.8513	0.00101508	-1.61989	1.9754	-1.52626	0.710821	0.950051	0.526194
		728	1.44631	0.93739	2.01741	2.93311	2.9208	1.35433	18.8513	0.00102269	-1.63399	1.9754	-1.49501	0.691921	0.950116	0.479169
		729	1.03719	0.976886	2.51985	2.74756	2.88361	1.35621	9.96881	0.00130033	0.042718	1.37699	0.939791	0.745954	0.930139	0.415743
		730	1.22686	0.974922	2.64441	1.40269	2.90344	1.62701	11.0266	0.00150276	1.69492	1.42197	0.582671	-0.759469	0.940458	0.435993
		731	1.73232	0.93737	2.1424	1.2722	2.15618	1.1265	19.7624	0.00113898	-1.578	1.9158	-6.00769	0.632758	0.955113	0.382565
		732	1.10679	0.977518	2.49847	2.19191	2.84225	1.41545	7.63577	0.00109116	-1.38784	1.83733	0.811205	0.779889	0.935116	0.603456
		733	1.04193	0.976842	2.50522	2.82768	2.8617	1.35877	3.00436	0.00173935	-0.478443	1.11636	0.909451	0.80118	0.930216	0.598522
		734	1.20196	0.942109	2.26561	2.81262	2.95435	1.08669	10.8771	0.00107834	-0.414083	1.97516	0.482841	0.755871	0.940155	0.53929
		735	1.11444	0.976883	2.47585	2.21536	2.893	1.35582	10.4341	0.00130306	0.0764913	1.96798	0.860046	0.713141	0.935169	0.43154
		736	1.30382	0.940727	2.18277	2.7455	2.93626	1.32986	18.6265	0.001199	-0.0360286	1.99244	0.0155308	0.671352	0.945223	0.356434
		737	1.04857	0.97136	2.50678	2.94286	2.91791	2.12199	8.45437	0.00100265	0.27327	1.83457	0.945836	0.656656	0.930025	0.380086
		738	0.965436	0.989177	2.48241	2.92717	1.41246	1.12757	1.92474	0.00178007	-1.97863	-0.637637	0.843953	0.843463	0.92564	0.588194
		739	1.19299	0.944246	2.26362	2.96137	2.10302	1.08277	9.21032	0.00103259	-1.80648	1.81938	0.291815	0.803118	0.94005	0.62944
		740	0.919655	0.944489	2.48209	2.92444	1.37332	1.36723	2.42795	0.00154348	-1.77339	-0.625939	0.896146	0.840243	0.91436	0.590506
		741	0.932249	0.977325	2.50578	2.91069	1.44748	1.15513	2.84648	0.00102558	-1.9534	-0.728286	0.883213	0.840409	0.922006	0.56049
		742	1.3005	0.948112	2.14755	2.98596	2.87758	1.42972	10.9017	0.00120772	-0.859321	1.91499	-0.119456	0.731247	0.94504	0.564601
		743	1.11442	0.976015	2.47585	2.16973	2.90287	1.57454	10.8363	0.001008	-0.427376	1.96926	0.847695	0.73576	0.935528	0.513473
		744	1.0286	0.979022	2.44411	2.93997	2.05164	1.29513	7.75531	0.00113405	-1.81284	0.852098	0.858621	0.821342	0.930838	0.591229
		745	0.978634	0.975639	2.60745	2.11677	1.81973	1.51284	7.85058	0.0011957	0.123355	1.42374	0.955388	0.749809	0.923039	0.458827
		746	1.7113	0.92617	2.13113	1.32451	1.60373	1.14543	18.6134	0.00101091	-1.92324	1.90574	-6.28825	0.671918	0.95525	0.379926
	7	747	0.944253	0.986858	2.59592	2.90453	1.29061	1.45233	1.51446	0.0022144	-1.50538	0.999065	0.944865	0.831026	0.922341	0.628501
		748	1.19067	0.957691	2.32261	2.53271	2.81344	1.0044	7.88722	0.00115763	-1.84289	1.80766	0.421621	0.793112	0.940005	0.615861
		749	1.10064	0.967455	2.44046	2.50953	2.83231	1.04701	5.9376	0.00113519	-0.0765257	0.813365	0.768323	0.796913	0.935213	0.578518
		750	1.1908	0.947759	2.33883	2.53271	1.25277	1.02826	10.8505	0.00115726	-1.82362	0.487665	-0.0275288	0.820354	0.940762	0.647213
		751	1.12042	0.980743	2.60161	1.90744	2.83356	1.82306	18.3779	0.00108974	1.96791	1.68804	0.914455	-3.86844	0.935004	0.108283
		752	0.980204	0.987071	2.69529	2.60515	1.81178	1.34166	3.4717	0.00208376	-1.5257	0.899523	0.934622	0.825413	0.925052	0.592569
		753	0.966646	0.985696	2.58096	2.64888	1.79107	1.3452	3.33146	0.00208376	-1.97063	0.899523	0.930892	0.831289	0.925012	0.595306
		754	0.988288	0.985139	2.69416	2.53406	1.93074	1.34693	4.00339	0.00100016	-1.05163	1.58729	0.945997	0.808568	0.925268	0.586208
		755	1.28236	0.934718	2.19692	2.53041	2.48479	1.0159	11.4874	0.00100905	-1.98244	0.677051	-0.472982	0.792942	0.945028	0.668695
		756	1.19067	0.957712	2.34511	2.24404	2.81344	1.00068	10.8733	0.00115702	-1.81532	1.92784	0.456302	0.783087	0.940128	0.576718
		757	1.30371	0.957979	2.33358	1.78631	2.84012	1.10554	18.1149	0.00119821	0.295939	1.8074	0.0353776	0.671875	0.945079	0.395812
		758	0.977849	0.981492	2.7053	2.70559	1.2693	1.01228	3.81982	0.00108756	-1.76445	-0.216548	0.869604	0.841997	0.92501	0.568911
		759	0.970566	0.898749	2.67189	2.70996	1.25685	1.34748	3.65922	0.00101648	-1.74652	-0.340317	0.843099	0.845427	0.905797	0.634261
		760	0.97656	0.985206	2.68871	2.59939	1.93663	1.22578	3.78764	0.00108362	-1.04711	0.926923	0.941412	0.821791	0.925078	0.577532
		761	1.30152	0.956435	2.30761	1.80438	2.94546	1.46023	18.288	0.00112514	0.317647	1.63838	0.0604114	0.650117	0.945106	0.389726
		762	0.924074	0.9925	2.94516	2.21498	0.360293	1.72637	2.3396	0.00157654	-0.588707	0.473399	0.950913	0.816787	0.918128	0.668862
		763	0.917824	0.983527	2.94516	1.93774	0.408706	1.72581	18.5088	0.00114611	-0.704222	0.445503	0.956545	0.780122	0.917725	0.506033
		764	1.42529	0.953264	2.32456	1.45905	2.07449	1.01226	16.26	0.00101153	-1.30273	0.621119	-1.78007	0.751962	0.950222	0.647014
		765	1.31261	0.956549	2.37113	1.90435	2.94442	3.93229	18.4269	0.00120493	0.258204	1.63587	0.109549	0.434096	0.94509	-0.625726
		766	1.10013	0.967455	2.43982	2.51372	2.83231	1.04702	5.97971	0.00115495	-1.54933	0.813365	0.707233	0.810187	0.935482	0.603883
		767	1.03521	0.992388	2.56756	2.20161	1.9488	1.0121	3.72016	0.00195379	-1.98753	0.832584	0.831215	0.828962	0.930241	0.591742
		768	1.1169	0.980684	2.60161	1.90744	2.85601	1.82306	18.3779	0.00108974	0.127398	1.72642	0.875622	0.65841	0.935385	0.296721
		769	1.29917	0.956199	2.36898	1.77281	2.83618	1.10486	18.2173	0.0010325	0.268399	1.63537	0.0283351	0.686048	0.945048	0.438397
		770	1.1891	0.957663	2.30498	2.53298	2.87079	1.18687	7.88722	0.00114699	-1.78966	1.80168	0.448501	0.785483	0.940002	0.63094
		771	1.0491	0.983555	2.56773	2.49782	2.84579	1.14218	3.48963	0.00100804	-0.497873	1.47529	0.911012	0.793595	0.930218	0.573773
		772	1.18913	0.954522	2.31941	2.70221	2.11116	1.02817	4.35791	0.00107016	-1.84687	0.564291	0.125733	0.815111	0.940074	0.695696
		773	1.29522	0.956116	2.33358	1.78631	2.84281	1.10554	18.1149	0.00102348	-0.857215	1.80753	-0.0305229	0.723058	0.945061	0.502875
		774	1.42321	0.952994	2.34886	1.42666	2.85997	1.80307	18.7676	0.0010036	0.190419	0.5994	-1.14065	0.611837	0.950015	0.413872
		775	0.945014	0.896894	2.69498	2.92469	0.9557	1.18116	1.53063	0.00195043	0.086787	-0.273148	0.917155	0.840898	0.899752	0.626647
		776	1.11706	0.981728	2.56919	1.92693	2.77532	1.91646	17.0902	0.00101311	-1.04961	1.90002	0.840786	0.712461	0.935784	0.442384
		777	1.03747	0.992699	2.57514	2.27346	1.96247	1.00966	3.63216	0.00151368	-1.59029	1.18074	0.857519	0.822913	0.930031	0.590877
		778	1.19067	0.957691	2.32303	2.53271	1.60441	1.00821	10.575	0.00115726	-1.82362	1.7235	0.241344	0.806889	0.940197	0.60586
		779	1.18953	0.958251	2.31337	2.53458	1.2469	1.00447	3.65999	0.0020197	-1.89134	-0.119704	-0.177746	0.826757	0.940198	0.717128
		780	1.29731	0.955459	2.36898	1.82626	2.83618	1.10486	18.1811	0.0010325	-0.487219	1.63537	-0.0249728	0.715321	0.945075	0.488852
		781	0.976753	0.983978	2.69444	2.21357	0.836182	1.89972	16.5279	0.00100221	-0.403458	1.39622	0.955039	0.745933	0.925137	0.375073
		782	1.42842	0.951389	2.34093	1.32697	2.79894	1.00968	18.2309	0.00100389	-0.564135	0.579877	-1.45754	0.710504	0.950137	0.608735
		783	1.19214	0.958128	2.31547	2.53271	1.5815	1.01633	7.90606	0.00126866	-1.82577	1.80819	0.220806	0.81012	0.940016	0.637941
		784	1.30079	0.956427	2.36962	1.80541	2.84148	1.47966	18.2173	0.0010325	0.448323	1.63537	0.0789958	0.635393	0.945028	0.392914
		785	0.99985	0.966867	2.67923	1.33969	1.49027	2.0799	16.6109	0.00120739	0.927059	1.53198	0.95984	0.160887	0.908332	0.20642
		786	1.19069	0.959004	2.36892	2.33284	2.91644	1.90213	11.0014	0.00102784	-1.00193	1.80766	0.568361	0.732067	0.940023	0.547379
		787	1.04762	0.993003	2.56508	2.22841	2.68707	1.00603	3.93863	0.00108449	-1.59029	1.70116	0.887122	0.808192	0.930422	0.575456
		788	1.42767	0.948427	2.34093	1.32697	2.79894	1.00968	18.307	0.00100407	0.260473	0.448588	-1.38084	0.695815	0.950074	0.586952
		789	1.1895	0.956163	2.31487	2.53271	3	1.01598	10.8816	0.001	-1.00193	1.80766	0.50336	0.776256	0.940066	0.566329
		790	1.11529	0.973274	2.57265	1.75302	2.95053	1.79856	16.6027	0.00110646	-0.567156	1.84598	0.852751	0.703511	0.935409	0.422942
		791	1.05563	0.986061	2.55383	2.44142	2.85708	1.81766	16.7409	0.00102413	0.137556	1.891	0.950027	0.634661	0.931049	0.197625
		792	1.10667	0.945903	2.35986	2.81365	1.27763	1.01228	3.71273	0.00103961	-1.79822	0.164314	0.372262	0.835334	0.935276	0.688097
		793	1.03904	0.983536	2.57783	2.21304	2.82534	1.20761	7.81916	0.00100086	-0.831378	1.70116	0.925144	0.783232	0.930427	0.532484
		794	1.09464	0.967916	2.43291	2.53541	2.76398	1.08576	5.90812	0.0010079	-0.435087	0.428425	0.733423	0.806768	0.935277	0.60484
		795	1.42767	0.957814	2.34161	1.4058	2.79878	1.00968	17.0976	0.00125482	-1.15199	0.448791	-1.50636	0.715175	0.950049	0.602966
		796	1.1895	0.956163	2.31487	2.53271	2.99145	1.01592	15.7838	0.001	-1.01603	1.80766	0.523152	0.755879	0.940216	0.484868
		797	1.30078	0.956199	2.30648	1.77566	2.83618	1.10486	11.0487	0.00103449	-1.71193	1.80274	-0.210356	0.758532	0.945034	0.643498
		798	1.42666	0.947095	2.33695	1.36398	2.48479	1.01602	15.722	0.00100905	-1.8626	0.631688	-1.7359	0.74637	0.950195	0.671932
		799	1.09841	0.970351	2.4422	2.50087	2.83231	1.04599	10.645	0.0010247	0.0107263	0.818422	0.792336	0.781618	0.93538	0.515038
		800	1.42929	0.948426	2.34108	1.36405	2.59079	1.02263	16.5449	0.00117439	-0.0204614	0.636558	-1.43742	0.70811	0.950154	0.586523
		801	0.945014	0.886352	2.9519	2.88117	0.998379	1.16782	1.53063	0.00113484	0.086787	-0.149166	0.933387	0.84267	0.885224	0.620855
		802	1.29522	0.956116	2.33374	1.78631	2.84281	1.00888	18.1149	0.00102348	-0.857215	1.80753	-0.0427515	0.729301	0.945057	0.499573
		803	1.19019	0.956279	2.31544	2.53271	2.40129	1.11083	7.90606	0.00126547	-1.84795	1.80819	0.382003	0.796232	0.940001	0.629936
		804	1.30078	0.956199	2.30649	1.8964	2.94777	1.08182	11.2936	0.0010325	-0.982369	1.80729	-0.1199	0.747676	0.94508	0.614973
		805	1.42767	0.947745	2.33866	1.36398	2.96527	3.81874	15.4273	0.00103216	0.280975	0.630768	-1.05802	0.392379	0.950016	-0.706802
		806	1.09575	0.968034	2.4412	2.48891	2.05344	1.00099	8.11127	0.00102251	-1.7638	0.933787	0.668016	0.821203	0.935386	0.599798
		807	0.978631	0.981753	2.6719	2.59637	1.75588	1.71641	3.10768	0.00100096	-1.05746	1.5772	0.950202	0.806675	0.924558	0.619344
		808	1.42932	0.95313	2.32456	1.4711	2.07813	1.01629	16.1819	0.00101198	-1.99044	0.621958	-1.91334	0.758006	0.950322	0.66222
		809	1.42767	0.947744	2.33372	1.36398	1.81305	1.01739	15.722	0.0010364	-1.88985	0.669611	-2.01193	0.765886	0.950346	0.664951
		810	1.10069	0.980205	2.44942	2.50818	1.31777	1.02847	7.4877	0.0012648	-1.78782	0.320713	0.520434	0.830048	0.935556	0.629697
		811	1.06881	0.984329	2.57119	1.88774	2.89024	1.82463	16.7236	0.00111283	1.54422	1.8825	0.956387	-1.75246	0.931067	0.0696095
		812	1.04815	0.947723	2.44194	2.81365	1.27694	1.01228	3.71273	0.00103944	-1.80416	-0.168524	0.621847	0.841616	0.930806	0.644045
		813	1.1895	0.956506	2.31487	2.53271	2.99145	1.32447	15.7838	0.00100111	-0.972184	1.80766	0.551741	0.741026	0.940222	0.500553
		814	1.42548	0.94862	2.33842	1.49761	2.48479	1.01552	15.767	0.00101872	-1.10395	0.639326	-1.59427	0.737158	0.95009	0.648538
		815	0.984709	0.907449	2.68729	2.50778	1.25691	1.34748	1.49096	0.00197627	-1.77489	-0.354143	0.813554	0.845402	0.910549	0.657579
		816	1.42267	0.947759	2.33883	1.35065	1.28067	1.0287	10.8505	0.00116147	-1.86692	0.487665	-2.34436	0.782826	0.95006	0.712032
		817	1.43303	0.958128	2.33883	1.35065	1.58403	1.02826	10.8521	0.00126857	-1.86692	0.487665	-2.25835	0.77488	0.950114	0.708789
		818	1.11702	0.984828	2.573	1.84694	2.95053	1.14635	6.49436	0.00112421	-0.539047	1.85734	0.814938	0.76732	0.935017	0.571888
		819	1.29507	0.957979	2.34755	1.78631	2.9137	1.10129	18.1149	0.00112012	-1.75357	1.80753	-0.0758171	0.73115	0.945136	0.520792
		820	0.98072	0.984536	2.68734	2.60515	1.5912	1.14194	1.65723	0.00208852	-1.77034	0.899523	0.919257	0.835258	0.925015	0.604965
		821	1.10902	0.979783	2.5989	1.84899	2.89166	1.82323	18.1507	0.00107718	0.199791	1.77089	0.891143	0.645917	0.935004	0.283223
		822	1.05522	0.983799	2.55208	2.26745	2.83877	1.8055	19.2578	0.00111221	1.73854	1.8825	0.95987	-3.56918	0.930605	-0.0725505
		823	1.42685	0.953238	2.33713	1.46338	2.80257	1.10888	15.9212	0.00100389	-1.31761	0.628371	-1.51376	0.72055	0.950094	0.65278
		824	1.1169	0.980684	2.60789	1.89657	2.85601	1.0742	10.8188	0.00103348	0.127398	1.72524	0.835435	0.735372	0.935145	0.464266
		825	1.27717	0.93666	2.18208	2.77219	2.84296	1.01468	12.8361	0.00101464	-1.79894	0.559157	-0.351911	0.785651	0.945006	0.643603
		826	1.30047	0.956549	2.30562	1.80766	2.83733	1.86333	19.1339	0.00120289	0.36482	1.63587	0.102951	0.608918	0.945061	0.267838
		827	1.27913	0.948409	2.1751	2.6524	2.42212	1.02253	17.1596	0.00101939	-1.15277	0.653368	-0.32114	0.771613	0.945232	0.570298
		828	1.05034	0.985273	2.52109	2.53406	2.84524	1.34693	4.00339	0.00100102	0.157976	1.58729	0.929924	0.758074	0.930127	0.548385
		829	1.19069	0.958207	2.36896	2.32844	2.92428	1.80429	10.7997	0.00102784	-1.57972	1.8907	0.540242	0.746499	0.940069	0.582571
		830	1.42563	0.953118	2.33384	1.35828	2.40193	1.00968	16.2517	0.00101692	-1.05887	0.448588	-1.68089	0.740176	0.95018	0.653988
		831	0.99985	0.972277	2.69242	1.19141	1.49027	2.0799	10.4384	0.00120739	0.867306	1.86559	0.960439	0.316357	0.898102	0.334396
		832	1.42767	0.952961	2.3386	1.37601	2.84515	1.05712	18.8525	0.00119795	0.294289	0.575275	-1.26539	0.675725	0.950093	0.52657
		833	1.42795	0.950256	2.3386	1.37788	2.84353	1.00156	18.3018	0.00100775	0.278461	0.689113	-1.29445	0.690428	0.950112	0.568744
		834	1.31461	0.959126	2.33277	1.90435	2.94672	3.92406	18.1461	0.00120482	0.302071	1.80052	0.121738	0.424319	0.945381	-0.663525
		835	1.1173	0.984828	2.573	1.85612	2.95053	1.85854	16.2028	0.00111477	-0.539047	1.85749	0.859421	0.696721	0.935577	0.412279
		836	0.945014	0.969341	2.69498	2.92469	1.27011	1.03379	1.24492	0.00187587	0.086787	-0.273148	0.938072	0.835722	0.920231	0.57376
		837	1.19067	0.957691	2.32303	2.53271	1.84157	1.00218	11.3638	0.00115726	-1.82362	1.80766	0.303936	0.800693	0.940186	0.587322
		838	1.29507	0.957979	2.33329	1.78631	2.8451	1.00512	18.1149	0.00120281	-1.71331	1.80817	-0.0952031	0.735986	0.945098	0.503531
		839	1.27611	0.936813	2.18208	2.77219	2.04608	1.01457	12.8361	0.00101464	-1.79894	0.559157	-0.527118	0.800853	0.945053	0.655156
		840	1.09668	0.968028	2.43981	2.53277	2.84149	1.20928	5.94398	0.00110965	-0.475191	0.51377	0.745965	0.800675	0.935303	0.614696
		841	0.942134	0.967597	2.60537	2.84745	1.62349	1.17114	1.51091	0.00204532	-1.81468	-0.202518	0.9092	0.84016	0.922132	0.576691
		842	1.03904	0.992699	2.57697	2.2061	1.96233	1.01771	6.24419	0.00102008	-1.58451	1.64016	0.876357	0.815449	0.930206	0.572394
		843	0.942604	0.889181	2.60537	2.95043	1.63984	1.17114	1.43873	0.00125199	-1.7864	-0.209184	0.890641	0.845195	0.898538	0.599641
		844	1.03904	0.986153	2.57697	2.53492	2.97869	1.0121	6.24419	0.00100998	-1.59029	1.64016	0.905801	0.804356	0.930065	0.537078
		845	1.05034	0.985273	2.52109	2.53406	2.84524	1.35362	17.6262	0.00102965	0.157976	1.63412	0.94098	0.671264	0.931052	0.221906
		846	1.29731	0.955459	2.36257	1.82626	2.83591	1.15697	18.3773	0.00108975	-0.487219	1.72876	0.00188424	0.707118	0.94506	0.469281
		847	1.05519	0.981914	2.55208	1.86012	2.83872	1.82463	17.1931	0.00101506	1.73854	1.90004	0.960041	-2.94212	0.929023	0.0486954
		848	1.42767	0.947744	2.33372	1.36369	1.81305	1.02811	16.5541	0.00104038	-1.88985	0.669611	-1.99592	0.762765	0.950372	0.65093
		849	1.02966	0.981221	2.53462	2.58517	1.57052	1.1724	2.26793	0.00115226	-0.754137	-0.296899	0.783661	0.831339	0.930488	0.646727
		850	1.02208	0.981562	2.53477	2.56262	1.30601	1.17504	1.99032	0.00115226	-1.43704	-0.274186	0.758327	0.836298	0.930067	0.656962
		851	1.11698	0.984539	2.57302	1.8571	2.8141	1.40961	6.25522	0.00100791	-0.564305	1.86685	0.819634	0.760563	0.935016	0.597214
		852	1.42666	0.947095	2.33483	1.49204	1.26764	1.01602	15.4992	0.00102637	-1.74605	0.631688	-2.26126	0.778299	0.950396	0.65307
		853	1.09942	0.972479	2.4388	2.50404	2.83231	1.04701	6.07322	0.00189027	-0.0765257	0.813365	0.784669	0.792376	0.93501	0.551691
		854	1.3015	0.956427	2.36962	1.80462	2.84148	1.43307	18.2173	0.00103126	0.258395	1.63537	0.0525686	0.660722	0.945096	0.414785
		855	0.97807	0.985374	2.69416	2.53421	1.96503	1.24187	6.09076	0.00101928	-0.138663	0.933746	0.950173	0.801901	0.925157	0.521002
		856	1.05269	0.985851	2.60175	1.90384	2.85597	1.82615	18.3779	0.00108977	0.125638	1.72642	0.945378	0.656936	0.930764	0.250741
		857	1.31461	0.956126	2.33277	1.90435	2.94672	3.92406	18.1461	0.00120482	0.178484	1.80052	0.106993	0.436618	0.945525	-0.645261
		858	1.42529	0.953264	2.32456	1.45905	2.68967	1.01226	16.26	0.00101153	-1.30273	0.621119	-1.55295	0.732332	0.950129	0.648826
		859	1.27522	0.948613	2.1727	2.6524	2.42212	1.2275	17.1596	0.00101939	-1.15277	0.653368	-0.268014	0.761355	0.945056	0.573523
		860	1.27913	0.948613	2.1727	2.6524	2.42216	1.08499	17.7107	0.00101937	-1.18446	0.653368	-0.312335	0.766864	0.945237	0.565639
		861	1.119	0.979854	2.56931	1.88769	2.83356	1.82306	18.6276	0.00115481	1.58436	1.82361	0.913556	-1.62494	0.935104	0.0715202
		862	1.05212	0.985774	2.69692	1.70501	2.96001	1.78939	16.648	0.00110749	-0.587244	1.84598	0.937337	0.710072	0.930489	0.40291
		863	0.928602	0.986906	2.87276	1.53204	0.536168	1.86073	2.48604	0.0247607	-0.611711	0.900328	0.95577	0.802996	0.90177	0.642509
	8	864	0.97436	0.927056	2.69976	2.77046	1.4266	1.24755	1.31018	0.00206311	-1.8654	-0.1683	0.861859	0.84504	0.915392	0.627738
		865	0.999698	0.967411	2.51432	2.33553	1.33415	2.18502	19.4723	0.00105727	0.255004	1.58749	0.956118	0.623662	0.925311	0.0991039
		866	1.05547	0.966253	2.57959	2.44855	2.90858	1.29366	9.67442	0.00119738	-0.258437	1.84189	0.930227	0.744786	0.930549	0.448557
		867	1.08674	0.965576	2.42115	2.82282	2.45954	1.00857	7.89342	0.00105525	-1.51304	0.0399607	0.657167	0.822117	0.935069	0.584054
		868	1.03569	0.968268	2.48318	2.838	2.01217	1.0032	4.06433	0.00106214	-1.81759	1.54805	0.856605	0.826946	0.930093	0.590306
		869	1.03573	0.968217	2.47643	2.81956	2.01213	2.20967	19.05	0.00105081	0.204811	1.58727	0.945361	0.638169	0.930053	0.12739
		870	1.44168	0.952432	2.45796	1.20229	2.34653	1.01469	15.8644	0.00101051	-1.85592	1.59761	-1.61292	0.735017	0.950027	0.639302
		871	1.10744	0.967197	2.42593	2.41409	2.50694	2.61668	14.605	0.00178231	-0.236948	1.74478	0.858859	0.669793	0.935206	0.219381
		872	0.976114	0.965918	2.51359	2.84292	1.9868	1.59552	11.2622	0.00100554	-0.145608	0.831994	0.950931	0.786462	0.925314	0.481474
		873	0.940834	0.998393	2.69905	2.88236	1.38403	1.00497	1.03268	0.00201758	0.146172	-0.151222	0.946309	0.832051	0.920869	0.559866
		874	1.30522	0.965474	2.43795	1.58557	2.51409	2.19548	19.7184	0.00105596	-0.269413	1.56968	0.0201507	0.625238	0.945223	0.251235
		875	1.05429	0.965918	2.51306	2.45296	2.80501	1.59552	11.2622	0.00100552	-0.271541	1.89725	0.934914	0.732315	0.931206	0.44554
		876	1.0344	0.991195	2.48181	2.80207	2.73865	1.3237	12.5907	0.00100607	-1.04463	1.58461	0.927547	0.771186	0.930128	0.467719
		877	1.11248	0.97898	2.46483	2.35725	2.98855	1.15538	5.56107	0.00108618	-1.89149	1.83614	0.765525	0.795037	0.935187	0.614641
		878	1.4435	0.949991	2.42803	1.22525	2.43453	1.0175	17.0528	0.00104911	-1.70877	1.66749	-1.55924	0.72576	0.950107	0.607055
		879	1.03595	0.97841	2.47817	2.79799	2.9751	1.32354	6.58153	0.00100557	-1.70932	1.92788	0.919701	0.798209	0.930415	0.576777
		880	1.43869	0.953483	2.43406	1.22587	2.95635	2.77535	19.4772	0.00108831	-1.87709	1.64409	-1.09677	0.533354	0.95004	-0.0031142
		881	1.43105	0.950081	2.46434	1.22509	0.980887	1.0243	15.5774	0.00105753	-1.75209	-0.86475	-2.84731	0.785182	0.950594	0.675698
		882	0.946522	0.976359	2.65885	2.95799	1.56722	1.07644	1.20464	0.0010153	-1.68977	0.853118	0.936954	0.835726	0.922026	0.58075
		883	1.44126	0.953278	2.42349	1.21387	2.9836	1.208	18.4659	0.00103415	-1.7501	1.7264	-1.29829	0.683807	0.950019	0.57552
		884	1.66873	0.947349	2.4686	0.877637	1.21468	1.01237	19.5909	0.00149621	-1.87721	1.6479	-5.45363	0.698416	0.955085	0.362089
		885	0.981067	0.976033	2.57421	2.99829	1.80872	1.0582	1.10278	0.00101059	-1.7876	1.31695	0.921618	0.835371	0.925096	0.595811
		886	1.03836	0.989419	2.42985	2.8225	2.81178	1.32354	5.34741	0.001061	-1.7074	1.91607	0.913044	0.802494	0.930024	0.592348
		887	1.10828	0.978836	2.48118	2.37948	2.99049	1.61014	15.1558	0.00117796	-1.16523	2	0.856988	0.726781	0.93507	0.450117
		888	1.67771	0.945991	2.45877	0.866229	2.83689	1.01656	18.6581	0.0018595	-0.866943	0.82717	-4.55412	0.601497	0.955102	0.476549
		889	1.02698	0.974783	2.47448	2.84431	2.02378	1.00163	2.45004	0.00107498	-1.79585	0.0206618	0.78582	0.836551	0.930623	0.603741
		890	1.29488	0.954423	2.48219	1.46881	2.51905	1.00247	15.4528	0.00103816	0.196349	0.868604	-0.15509	0.736121	0.945052	0.564302
		891	1.69583	0.953443	2.40601	0.891318	2.54151	1.00946	19.3037	0.0015623	-0.268753	1.86192	-4.54377	0.591889	0.955063	0.377476
		892	1.299	0.950513	2.47979	1.44682	1.28315	1.01767	11.4746	0.0010507	-1.73309	0.882906	-0.77609	0.800606	0.945311	0.685399
		893	1.45002	0.953484	2.43057	1.20873	2.62717	1.0175	19.2237	0.00105114	0.27422	1.64819	-1.27826	0.661584	0.950063	0.483432
		894	0.969222	0.987979	2.66794	2.74106	1.43378	1.16559	1.98673	0.00101003	-1.82974	-0.258096	0.882518	0.840997	0.925235	0.599627
		895	0.905809	0.952537	2.69471	2.52709	1.0167	1.14388	1.41189	0.00101794	0.105858	-0.1683	0.950698	0.827558	0.912255	0.594365
		896	1.11155	0.977794	2.46775	2.36039	2.94029	1.15611	5.50524	0.00108618	-1.44475	1.95979	0.790763	0.788229	0.935005	0.606382
		897	1.0267	0.977966	2.48903	2.81332	1.4988	1.00536	2.30379	0.00106888	-1.84878	0.0195227	0.753857	0.840614	0.930497	0.625462
		898	1.29928	0.96937	2.42053	1.52802	2.42047	1.01289	15.7057	0.00108929	-1.74881	1.3171	-0.292446	0.760495	0.94519	0.591164
		899	1.44808	0.953248	2.435	1.21735	2.61604	2.86733	19.6925	0.00108831	0.343055	1.64813	-0.985978	0.446473	0.950058	-0.34757
		900	1.09556	0.967623	2.42586	2.41098	2.58833	1.05549	8.04682	0.00104045	-0.91476	0.792809	0.733021	0.808021	0.935352	0.585478
		901	1.30466	0.963828	2.45886	1.45459	2.81011	1.58821	18.3715	0.00103004	-0.68861	1.74329	-0.00123359	0.677702	0.945229	0.469554
		902	1.43869	0.953733	2.43389	1.22587	2.95626	2.77535	19.4772	0.00108831	-1.51972	1.64409	-1.05291	0.524678	0.950005	-0.027813
		903	1.08674	0.963796	2.42132	2.82282	1.26126	1.01782	8.04113	0.00104013	-1.863	0.0475166	0.515878	0.836637	0.935151	0.628945
		904	1.19813	0.965853	2.4261	2.03589	2.82674	1.1616	18.9367	0.00150725	-0.275131	1.64845	0.57317	0.703584	0.940251	0.356027
		905	1.299	0.953422	2.43408	1.44682	2.52631	1.0125	10.523	0.0010283	-1.74658	0.856719	-0.440299	0.77613	0.945157	0.683249
		906	1.4318	0.953907	2.46319	1.26471	1.35525	1.008	15.0367	0.0010652	-1.56866	0.104438	-2.31767	0.775126	0.950251	0.679771
		907	1.08674	0.966234	2.42113	2.83482	1.26116	1.11635	8.10022	0.00105484	-1.35022	0.103609	0.558789	0.83036	0.935083	0.637671
		908	1.44257	0.955812	2.43851	1.20493	2.44315	1.01071	15.9755	0.00101165	-1.76502	1.66588	-1.56062	0.730302	0.950054	0.632778
		909	1.03572	0.976709	2.48182	2.84297	1.59853	1.27173	1.97728	0.00107123	-1.82668	0.891082	0.809131	0.832213	0.930447	0.668365
		910	0.974387	0.976472	2.58551	2.73957	2.53111	1.25617	3.74477	0.00101741	-0.258437	0.724253	0.947959	0.813419	0.925457	0.558794
		911	0.98101	0.975474	2.52635	2.94667	1.80743	1.17952	2.79018	0.00101211	-1.78731	1.32286	0.924944	0.831801	0.925884	0.599468
		912	1.17798	0.963492	2.42735	2.03421	2.52333	1.01345	18.8283	0.00153358	-0.905857	0.830345	0.479143	0.750719	0.940071	0.431399
		913	1.29759	0.964156	2.47298	1.46918	2.59026	1.00317	18.8945	0.00106181	-1.79506	1.60244	-0.166815	0.741638	0.945181	0.533515
		914	1.29787	0.964156	2.47734	1.50569	2.54308	1.00317	18.8926	0.00103916	-0.932412	1.60244	-0.0986032	0.731185	0.945021	0.504126
		915	1.03505	0.976215	2.47821	2.83715	2.97863	1.01079	3.36199	0.00100033	-1.96189	1.8058	0.897076	0.814312	0.930064	0.571323
		916	0.94241	0.928254	2.6682	2.83738	1.59598	1.27515	1.05656	0.0022685	-1.47295	0.901278	0.941986	0.835409	0.911689	0.613853
		917	1.1088	0.976425	2.42609	2.35725	1.96986	1.0052	5.51211	0.00108618	-1.9279	1.85161	0.680084	0.815988	0.935093	0.622931
		918	1.44179	0.954092	2.42987	1.28682	2.43699	1.0107	19.2605	0.00101402	-1.76563	1.67631	-1.49999	0.719097	0.950033	0.571321
		919	1.20114	0.963658	2.29019	2.52229	2.54668	1.03357	7.84422	0.00154052	-1.95841	1.6479	0.319388	0.7966	0.940448	0.618894
		920	1.44042	0.953548	2.43027	1.20611	1.50931	1.01571	18.4746	0.00102641	-1.84698	1.87569	-1.86284	0.750933	0.950092	0.555521
		921	1.44661	0.953292	2.42718	1.22587	2.54549	2.76879	19.7876	0.00102747	0.317346	1.64409	-1.01607	0.466475	0.95006	-0.279472
		922	1.17335	0.96567	2.4294	1.97363	2.55593	1.11643	15.8682	0.00100227	-1.30767	0.836794	0.451947	0.772864	0.94004	0.547646
		923	1.03573	0.974733	2.47742	2.81676	2.54382	2.20971	18.6773	0.00104965	0.162859	1.84363	0.951292	0.605943	0.93004	0.0832082
		924	1.19608	0.970039	2.42904	2.00591	2.53662	1.01503	19.0793	0.00154052	-1.02307	1.6479	0.501823	0.735051	0.940229	0.392655
		925	1.43866	0.95295	2.42417	1.26528	1.40927	1.0169	18.2699	0.00103336	-1.70818	1.66845	-1.92704	0.755039	0.950143	0.558042
		926	1.68017	0.953444	2.42514	0.866229	2.90516	1.11033	18.3957	0.00183586	0.417078	0.840047	-4.29416	0.555921	0.95502	0.402525
		927	1.18025	0.965425	2.42122	2.03896	2.49028	1.00032	7.96289	0.00110331	-1.81424	0.0399607	0.21959	0.806789	0.940407	0.644361
		928	1.43869	0.953733	2.42963	1.22587	2.59968	1.03034	19.4826	0.00108779	-1.51972	1.63989	-1.38585	0.706088	0.950019	0.551386
		929	1.66873	0.947349	2.46961	0.878173	1.21468	1.01237	19.5909	0.00101786	-1.87721	1.6479	-5.62778	0.707612	0.955183	0.468275
		930	1.30466	0.963828	2.4338	1.54867	2.85071	1.19321	18.622	0.00103004	-0.68861	1.86086	-0.0139473	0.701435	0.945187	0.487873
		931	1.44132	0.953278	2.434	1.21387	2.9836	1.74832	17.6102	0.00100638	-1.67409	1.7264	-1.21603	0.63691	0.950009	0.477433
		932	1.44043	0.953034	2.42969	1.21695	1.88849	1.01419	18.6171	0.00103356	-1.87777	1.86611	-1.68734	0.740028	0.950067	0.567206
		933	1.67448	0.954294	2.42864	0.910381	2.52427	1.01775	15.5635	0.00156794	-1.49924	0.824609	-4.93323	0.651868	0.95509	0.593905
		934	0.949395	0.999982	2.66664	2.99329	1.39523	1.0582	1.09331	0.00205692	-1.77737	-0.19341	0.911342	0.840468	0.923031	0.566978
		935	1.44098	0.953278	2.42823	1.22594	2.9836	1.74832	19.2521	0.00103415	-1.70217	1.7264	-1.19473	0.63023	0.950054	0.443679
		936	1.43798	0.952941	2.42435	1.25005	1.42459	1.01769	14.5628	0.00100412	-1.71398	1.68453	-1.9791	0.763488	0.950004	0.626149
		937	1.4251	0.953907	2.43345	1.27069	1.35525	1.00962	14.9782	0.00106504	-1.29362	0.0979204	-2.22306	0.772613	0.950349	0.675201
		938	1.30161	0.967356	2.46323	1.46521	2.47656	1.05664	15.9069	0.00104587	-1.56678	1.8501	-0.168087	0.747746	0.945035	0.572479
		939	1.67099	0.945991	2.42146	0.877637	2.85618	1.03813	19.8014	0.00153768	-1.48487	0.879214	-4.60176	0.615783	0.955056	0.509987
		940	0.982439	0.977987	2.52482	2.94667	1.83741	1.52887	2.79018	0.00100782	-1.78775	1.32286	0.93349	0.827896	0.926129	0.633056
		941	1.43797	0.954654	2.42763	1.21445	2.89835	1.01218	18.411	0.00103747	0.640272	0.841062	-1.24207	0.653981	0.950103	0.546503
		942	0.905809	0.988624	2.69471	2.52709	1.0684	1.32745	1.41189	0.00101794	0.105858	-0.1683	0.950979	0.823513	0.917688	0.608449
		943	1.67327	0.945127	2.42843	0.883175	2.52427	1.01775	15.3972	0.00156976	-0.950923	0.841087	-4.85561	0.647629	0.955074	0.584468
		944	1.19608	0.974865	2.42819	2.00591	2.53662	1.01483	19.7652	0.00154052	-1.02307	1.6479	0.508444	0.7316	0.940004	0.380716
		945	1.10744	0.965466	2.4342	2.3838	2.50494	2.5865	19.1013	0.00181027	-0.235773	1.83858	0.871366	0.636194	0.935095	0.096103
		946	1.43798	0.954148	2.42378	1.21311	1.34536	1.01713	14.5628	0.00100412	-1.71398	1.64627	-2.04108	0.765598	0.950018	0.626627
		947	1.30522	0.965474	2.43812	1.57153	2.51409	2.19548	19.9083	0.00105596	-0.420335	1.56968	0.00711852	0.630052	0.945287	0.262706
		948	1.6697	0.954294	2.42864	0.909735	2.52427	1.02956	19.9698	0.00156794	-1.49924	1.00599	-4.6572	0.630325	0.95509	0.477215
		949	1.44179	0.953067	2.42988	1.28682	2.43699	1.01425	19.2605	0.00101402	-1.88149	1.67631	-1.51618	0.720275	0.950056	0.575091
		950	1.1955	0.964081	2.29137	2.52229	2.62294	1.00157	7.84422	0.00107858	-1.9574	1.43765	0.310699	0.800247	0.940368	0.6352
		951	1.30205	0.963828	2.43392	1.54867	2.85071	1.19124	14.5479	0.00100473	-0.7485	1.8472	-0.0361464	0.723644	0.945001	0.569966
		952	1.44257	0.955579	2.43851	1.20598	1.98443	1.0107	16.0509	0.0010101	-1.76502	1.66588	-1.74325	0.745758	0.950111	0.625147
		953	1.17335	0.96567	2.42981	1.98101	2.59541	1.11643	14.647	0.00108608	-1.88334	0.82994	0.417942	0.77866	0.940066	0.566539
		954	1.03504	0.975426	2.42974	2.83812	2.05064	1.26866	4.25694	0.00104006	-1.99392	1.84971	0.878737	0.821608	0.930134	0.622872
		955	1.19077	0.965853	2.4261	2.03365	2.82674	1.1616	18.9367	0.00100892	-1.80715	1.66948	0.493737	0.747434	0.940377	0.490702
		956	1.44278	0.953351	2.42995	1.22988	2.61546	2.23319	19.7632	0.00105095	-0.207275	1.56124	-1.09918	0.555033	0.950064	0.118586
		957	1.43869	0.953483	2.43406	1.21637	2.95635	1.0938	19.4772	0.00108831	-1.88186	1.64409	-1.30938	0.691048	0.950006	0.564898
		958	1.18087	0.965501	2.42122	2.03896	2.0423	1.00032	7.96289	0.00110862	-1.79776	0.0389509	0.151782	0.814039	0.940468	0.657101
		959	1.66972	0.955883	2.42878	0.901387	2.52786	2.19191	20	0.00156273	-0.939018	1.00093	-4.26703	0.449203	0.955042	-0.237048
		960	1.10854	0.963475	2.46989	2.38876	2.99075	1.13222	9.06623	0.00108733	-1.51096	1.93796	0.797026	0.784578	0.935245	0.563371
		961	1.10524	0.967522	2.42902	2.3478	2.99139	1.52213	14.605	0.00103951	-0.927429	1.58202	0.825247	0.74995	0.935577	0.492282
		962	1.29481	0.953419	2.43405	1.51956	1.68778	1.00286	11.0261	0.00106574	-1.22379	0.868181	-0.566245	0.78954	0.945275	0.673297
		963	1.08674	0.966234	2.42113	2.83482	2.96841	1.11635	8.10022	0.00105484	-1.35022	0.103609	0.704514	0.810747	0.935017	0.584995
		964	1.29928	0.953742	2.4299	1.52802	2.42102	1.01764	15.7057	0.00108929	-1.74843	1.77705	-0.225049	0.757296	0.945098	0.576933
		965	0.953403	0.978474	2.69994	2.96214	0.751619	1.77271	13.0742	0.00177149	-0.112574	0.834006	0.955525	0.761987	0.921542	0.366521
		966	1.19608	0.970039	2.42903	1.99075	2.61155	2.22041	19.0959	0.00105218	-0.20741	1.6407	0.607777	0.657241	0.940271	0.292894
		967	1.44132	0.953102	2.434	1.21387	2.9836	1.52668	17.7132	0.00100632	-1.78678	1.7264	-1.26127	0.659051	0.950018	0.540099
		968	1.1088	0.976362	2.46632	2.40998	2.57845	1.15641	6.16094	0.00108158	-1.93565	1.83679	0.751267	0.802106	0.935083	0.616698
		969	1.66984	0.947804	2.411	0.946774	2.01999	1.00241	18.898	0.00100008	-1.66625	1.61664	-5.00955	0.676051	0.955101	0.551108
		970	1.30205	0.963828	2.43392	1.54867	2.84636	1.19124	14.5479	0.00100536	-0.770857	1.77771	-0.0511635	0.725365	0.945044	0.574833
		971	1.19813	0.965853	2.4261	2.09033	2.8259	2.77086	18.9968	0.00104881	-0.275131	1.64845	0.61652	0.623324	0.940326	0.173966
		972	1.29376	0.965452	2.45719	1.46349	1.38844	1.00284	15.1467	0.00100342	-1.28632	1.31158	-0.507414	0.78315	0.945128	0.605069
		973	1.44173	0.954076	2.42987	1.22405	2.58548	1.01477	18.6602	0.0010512	-1.70533	1.87303	-1.40192	0.711727	0.950007	0.569063
		974	1.10793	0.965576	2.42115	2.82725	2.99047	1.59307	7.87937	0.00105873	-1.51304	1.93796	0.814999	0.775497	0.935015	0.600795
		975	1.42339	0.946965	2.44227	1.17367	1.25081	1.00785	15.3391	0.00103668	-1.77856	0.0173992	-2.39096	0.781792	0.950085	0.687394
		976	1.03689	0.976214	2.48343	2.7819	2.46157	1.15355	5.56854	0.0011162	-1.92905	1.7052	0.888891	0.816316	0.9305	0.583496
		977	1.1959	0.966284	2.4261	2.03589	2.82921	1.17077	18.9367	0.00154112	-1.01993	1.6479	0.540857	0.721797	0.940293	0.403028
		978	1.17816	0.967381	2.43555	1.96121	2.01251	1.01401	13.7408	0.00106388	-0.883466	0.862698	0.379304	0.788274	0.940122	0.562789
		979	1.20114	0.963658	2.42609	2.01591	2.53559	1.02081	7.68867	0.00148522	-1.70801	1.64632	0.364922	0.791003	0.940343	0.619682
		980	1.30522	0.965474	2.42842	1.57153	2.814	2.19258	19.9515	0.00106089	-0.400736	1.56968	0.0524397	0.620227	0.945312	0.281472
		981	0.949797	1.01636	2.72741	1.96007	0.923501	1.75996	5.16146	0.0017303	-0.0639064	0.333665	0.951718	0.803985	0.920793	0.60782
		982	1.03836	0.989419	2.43955	2.8225	2.51186	1.32644	5.30424	0.00105608	-1.72699	1.91607	0.907019	0.806379	0.930033	0.599771
		983	0.982439	0.977987	2.51465	2.94667	1.8608	1.529	2.79018	0.00108508	-1.78775	1.64581	0.939479	0.824614	0.9258	0.629037
		984	1.29376	0.965274	2.45757	1.46349	1.99451	1.00284	15.1467	0.00100482	-1.30266	1.30937	-0.32657	0.771719	0.945076	0.60429
		985	1.17777	0.967442	2.47528	2.05739	1.44106	1.01422	10.262	0.00100907	-1.79433	0.0562098	0.0976264	0.82099	0.940014	0.654329
		986	1.03724	0.974736	2.49186	2.86192	2.69358	1.27734	19.8861	0.00103429	-0.28851	1.89095	0.942107	0.691542	0.930188	0.222552
		987	1.66972	0.9559	2.42877	0.909909	2.52411	1.03575	19.9998	0.00156806	-1.49924	1.00599	-4.6494	0.629048	0.955035	0.474505
		988	0.930544	0.951081	2.70191	2.43619	0.751965	1.78295	13.7865	0.00154162	-0.0417336	0.382426	0.955752	0.781839	0.916156	0.456336
		989	0.981297	0.967402	2.57756	2.99629	1.17097	1.21997	3.2191	0.00158119	-1.7913	-0.757744	0.809547	0.846531	0.926142	0.60466
		990	1.30233	0.965474	2.43739	1.5277	2.94287	2.19548	19.888	0.00105897	-0.24886	1.689	0.120797	0.607897	0.945125	0.26847
		991	1.6697	0.954277	2.42864	0.901213	2.52802	2.18571	19.97	0.00156261	-0.939018	1.00093	-4.2745	0.450701	0.955092	-0.231036
		992	1.10654	0.97474	2.42819	2.36953	2.98458	1.60179	8.48982	0.00154052	-1.02307	1.6338	0.822764	0.763815	0.935282	0.558132
		993	1.11038	0.976497	2.46689	2.36039	2.94029	1.15611	5.50524	0.00108618	-1.44475	1.87219	0.78665	0.790315	0.93506	0.607188
		994	1.30505	0.964437	2.43369	1.46148	2.80477	2.17616	18.0732	0.00118004	-0.272883	1.85082	0.101117	0.614227	0.94502	0.265945
		995	1.19208	0.970039	2.42904	2.00591	2.53662	1.01485	15.4545	0.00101266	-1.14831	1.6479	0.472322	0.76478	0.940206	0.511732
		996	1.4439	0.952969	2.42319	1.21423	2.96423	2.20592	18.4786	0.00103441	-1.7501	1.72619	-1.18885	0.58991	0.95012	0.284124
		997	1.66282	0.947662	2.43416	0.918477	2.52746	1.4	18.9081	0.00155209	-0.940314	0.997062	-4.39248	0.5781	0.955026	0.344562
		998	1.29318	0.96369	2.43455	1.51965	1.66668	1.00702	11.0136	0.00102069	-1.94275	0.779108	-0.630462	0.798213	0.945376	0.690349
		999	1.43869	0.953483	2.43405	1.22587	2.91239	1.95338	19.4775	0.00108831	-1.87709	1.64409	-1.19261	0.615433	0.950029	0.371139
		1000	1.19813	0.965853	2.4261	2.03589	2.84258	1.1616	18.9367	0.00104816	-0.275131	1.64985	0.555837	0.71329	0.940381	0.406288
		1001	0.980743	0.975474	2.52635	2.97945	1.94604	1.5952	2.79018	0.00102029	-1.19102	1.32286	0.943741	0.817971	0.925709	0.625415
		1002	1.44799	0.953248	2.43486	1.21734	2.61604	2.86277	19.2658	0.00108831	0.294714	1.64813	-0.996717	0.45294	0.950057	-0.329524
		1003	1.68096	0.94588	2.42118	0.877637	1.30441	1.00858	8.10939	0.0010555	-1.7954	0.10076	-6.80693	0.731045	0.955177	0.73608
		1004	1.10497	0.965906	2.42429	2.37948	2.99049	1.56158	15.1558	0.00117796	-1.16523	2	0.849062	0.73408	0.935276	0.455304
		1005	1.44392	0.954092	2.43001	1.22388	2.58621	1.04662	19.6872	0.00105058	-1.65984	1.9912	-1.36859	0.701597	0.950026	0.540594
		1006	1.10056	0.969409	2.42905	2.39009	2.60146	1.33093	19.5462	0.00104045	-0.939427	1.74478	0.831523	0.73831	0.935216	0.396249
QTS	1	1	1.14637	1.49369	0.521917	0.3	2.81687	1.08888	1.06118	0.1	-1.93982	0.509146	-0.544525	0.740157	0.150526	0.893582
		2	0.690298	1.07318	1.36655	0.319709	0.392142	1.65914	1.00474	0.0937318	-1.42427	0.643715	0.938902	0.536369	-0.117471	0.865372
		3	1.00152	0.885129	2.74186	2.9683	0.654817	1.4705	1.10235	0.0716803	-1.97696	-1.74059	0.564321	0.843233	0.898239	0.682604
		4	0.692237	0.887898	1.43013	0.374077	0.423621	1.66284	1.04858	0.0939263	-1.43641	0.507922	0.944376	0.583505	-0.0794464	0.854065
		5	0.933733	0.92875	2.97082	0.368262	1.10802	1.40522	1.02923	0.0859685	-1.93585	0.393184	0.65044	0.767056	0.458321	0.853332
		6	0.939812	0.885256	2.9955	0.477317	1.13904	1.45056	1.0232	0.0862753	-1.97787	0.747922	0.753207	0.79506	0.582169	0.831101
		7	0.958117	0.893104	2.91242	0.514401	1.28519	1.49977	1.05281	0.1	-1.97468	0.66679	0.736035	0.801477	0.630814	0.824559
		8	0.682061	0.898032	1.32196	0.3	0.411402	1.62733	1	0.070632	0.31989	-0.0480531	0.947227	0.551711	-0.270058	0.86112
		9	0.848621	0.886646	2.69694	1.46367	0.422678	1.55209	1.15863	0.1	-0.237412	-0.0546522	0.956224	0.806365	0.816696	0.729154
		10	0.903596	0.885	2.8594	2.85344	0.556063	1.611	1	0.1	-0.895991	0.323883	0.948261	0.835487	0.877853	0.695443
		11	0.8493	1.39358	0.599978	0.324718	0.694148	1.37561	1.07994	0.0985934	-1.95914	0.72809	0.666552	0.551967	-0.0312049	0.890176
		12	0.935227	0.896355	2.78493	2.87973	1.06797	1.52802	1.02824	0.0783196	-1.81052	0.452443	0.930594	0.838344	0.892725	0.681747
		13	0.692237	0.887287	1.32531	0.30094	0.397769	1.66628	1.04495	0.0722397	-1.44795	0.508066	0.930556	0.556998	-0.247656	0.86949
		14	0.839883	0.885	3	0.55003	1.09933	1.65004	1	0.0933497	-1.93625	1.49339	0.945862	0.790016	0.544475	0.787423
		15	0.697755	0.995631	1.80178	0.311385	0.392142	1.65783	1.06891	0.0962721	-1.48457	0.404579	0.938114	0.573964	-0.0785455	0.8644
		16	0.951923	0.921065	2.97016	0.377911	1.11218	1.40172	1.03387	0.0991187	-1.9765	0.683956	0.627278	0.772478	0.484723	0.855072
		17	0.935108	0.89321	2.96155	0.365133	1.7472	1.57603	1.008	0.0985164	-1.88472	0.583869	0.72284	0.788531	0.431876	0.833888
		18	0.953829	0.89181	2.94763	1.53904	0.753106	1.57289	1.36995	0.1	-1.86084	0.361024	0.888005	0.829319	0.881071	0.734698
		19	0.977638	0.917942	3	0.3	1.09422	1.31828	1.11243	0.0964109	-1.90655	0.401697	0.369778	0.756265	0.366873	0.874024
		20	0.84258	1.65	2.00448	0.3	0.505683	1.23744	1	0.1	-1.44932	0.545977	0.782141	0.573312	0.236042	0.879759
		21	0.929505	1.62011	1.99092	0.3	0.392001	1.06217	1.15478	0.085919	-1.56584	0.41243	0.452795	0.566657	0.31144	0.895321
		22	0.935469	0.886974	2.60324	2.97992	1.19797	1.5149	1.0173	0.0965188	-1.9225	-0.176676	0.88927	0.844906	0.891528	0.674712
		23	0.942092	0.89582	2.65723	0.301957	0.527615	1.10052	1.00592	0.1	-1.56335	-0.484378	0.215375	0.689525	0.291809	0.890409
		24	1.01854	0.913734	2.95761	0.604125	0.651941	1.3951	1.00476	0.1	-1.97097	-0.0506837	0.416727	0.795703	0.755631	0.845743
		25	0.999982	0.897301	2.51525	0.327221	0.38986	1.01559	1.0128	0.0980511	-1.97514	-0.0575633	-0.125691	0.684333	0.390282	0.899444
		26	1.03068	0.887463	2.95609	0.31997	1.9224	1.27195	1.05265	0.097818	-1.86217	0.363126	0.289322	0.788657	0.440591	0.858089
		27	0.98907	1.08379	0.724453	0.3	0.450567	1.00562	1.08395	0.0880299	-1.7135	0.26375	-0.385084	0.530557	0.0559458	0.910136
		28	0.761921	0.90893	2.9529	0.323323	0.488935	1.67278	1.01415	0.0996594	-1.93135	0.126903	0.897752	0.685089	0.12903	0.859092
		29	0.921186	0.887988	2.99382	0.366437	1.10837	1.58021	1.00402	0.093305	-1.96246	0.867087	0.727575	0.771329	0.416191	0.848356
		30	0.69488	0.886678	2.82486	0.307019	0.447978	1.66612	1.04814	0.0627251	-0.2377	0.393587	0.949292	0.632781	-0.0573431	0.845665
		31	0.847128	0.945434	2.57732	1.05671	0.501306	1.67576	1.01728	0.0965233	-1.93867	0.937896	0.954101	0.780353	0.772081	0.761821
		32	1.1893	0.906294	1.58652	0.312532	2.84209	1.06451	1.04629	0.0973969	-1.97534	0.411457	-0.875632	0.779206	0.403203	0.883772
		33	0.8699	0.885	3	0.543039	0.583088	1.51991	1.10298	0.084776	-2	0.185248	0.848151	0.773915	0.577741	0.829084
		34	0.920388	0.895859	2.93241	0.31114	1.19951	1.43839	1.07326	0.0985226	-1.97516	0.761467	0.656132	0.757753	0.309456	0.860217
		35	1.018	0.89088	2.96955	0.479454	1.25794	1.43104	1.04535	0.0845545	-1.98353	0.419353	0.480124	0.800551	0.652786	0.840872
		36	0.805521	1.10097	2.96709	0.307894	0.47537	1.62199	1.05536	0.0909461	-1.71504	0.302908	0.860477	0.661456	0.239699	0.869832
		37	0.991092	0.923689	2.97367	0.376688	1.11449	1.4072	1.04939	0.0916556	-1.98895	0.400241	0.451902	0.777702	0.524076	0.86004
		38	0.928148	1.62049	2.0079	0.300008	0.404047	1.04595	1.22207	0.0970536	-1.89643	0.402529	0.445907	0.571868	0.311869	0.895314
		39	0.927284	0.885	3	0.506698	1.25528	1.57212	1.03139	0.0850667	-1.94847	0.65394	0.808538	0.799613	0.600743	0.818701
		40	1.11593	1.48239	1.11302	0.333929	0.449949	1.00474	1.05272	0.0909582	-1.93102	-0.427553	-1.03168	0.549606	0.318107	0.911181
		41	0.878336	0.88572	2.99575	0.452809	0.668611	1.56733	1.01305	0.0874572	-1.93816	0.396702	0.811408	0.762955	0.492464	0.845207
		42	1.23097	0.886017	1.26662	0.3	2.78	1.06591	1.06398	0.0998069	-1.90137	-1.15195	-1.90826	0.769991	0.325804	0.893052
		43	0.965778	0.894757	2.71127	2.14866	0.583655	1.40025	1.05822	0.0996928	-1.93102	0.0838362	0.828723	0.829923	0.895484	0.731585
		44	0.929875	0.885617	3	1.05147	1.14943	1.54875	1.00684	0.086197	-1.97727	0.678381	0.912568	0.825468	0.833091	0.747322
		45	0.840868	0.885	2.99955	0.486321	1.15299	1.71639	1	0.0994311	-2	1.03985	0.930627	0.786233	0.485303	0.80488
		46	1.13849	0.909092	0.518054	0.30023	2.78356	1.09054	1.0555	0.0892932	-1.91884	0.741596	-0.91354	0.750841	-0.0206552	0.894095
		47	1.35387	1.28869	0.599915	0.331981	2.74281	1.02028	1.01619	0.001	-1.72696	0.133766	-2.82782	0.74531	0.336867	0.910089
		48	0.920014	0.885412	2.95277	0.339276	0.681707	1.31893	1.07326	0.0981898	-1.9742	0.775216	0.594368	0.736541	0.358192	0.870581
		49	0.994432	0.894085	2.95562	1.05227	1.1786	1.40342	1.01032	0.0837218	-1.89483	0.402813	0.790776	0.82782	0.863613	0.763663
		50	0.934327	0.887189	2.90792	0.478776	1.74996	1.57324	1.00102	0.0999934	-1.97468	0.754498	0.807585	0.80188	0.572188	0.809508
		51	0.953885	0.923549	2.96309	0.328779	1.18738	1.36513	1.08948	0.0995966	-1.86871	0.0542046	0.49942	0.761524	0.404563	0.864509
		52	0.969701	0.887603	2.99634	2.86035	0.821252	1.36566	1.00633	0.0953727	-1.74544	-1.75855	0.725066	0.847778	0.884545	0.646041
		53	1.05465	0.885	3	0.3	1.15003	1.16872	1	0.1	-2	0.705768	-0.0240248	0.76745	0.42031	0.881814
		54	0.902507	0.933705	2.93357	0.611481	0.580445	1.56222	1.14521	0.0865115	-1.94415	0.46792	0.845816	0.777007	0.678012	0.824339
		55	0.895603	0.895182	2.94661	0.392796	1.17288	1.64643	1	0.0845362	-1.92068	0.395077	0.783438	0.774494	0.434926	0.838392
		56	0.951923	0.885517	2.95511	1.08682	1.18299	1.63986	1.03387	0.0991187	-1.9765	0.695703	0.89051	0.826275	0.845124	0.753621
		57	0.977872	0.885	2.99346	0.582054	1.15832	1.58415	1.03485	0.0820964	-1.87401	0.50519	0.706986	0.809765	0.702561	0.818486
		58	0.96534	0.885067	2.92996	0.399393	1.69033	1.59903	1.01415	0.0999908	-1.99047	0.480837	0.647076	0.796271	0.506917	0.834026
		59	0.951923	0.88613	2.95571	1.08399	1.18299	1.39274	1.03464	0.0990393	-1.9765	0.683956	0.886029	0.827639	0.845164	0.747151
		60	0.877579	0.931088	2.99535	0.33713	0.588961	1.27515	1.07337	0.1	-1.92076	0.648212	0.708992	0.712841	0.333618	0.869594
		61	0.921098	0.895182	2.93239	0.393645	1.18911	1.43703	1	0.0853653	-1.92068	0.395077	0.711225	0.776802	0.462774	0.842715
		62	0.68841	0.88934	0.545905	0.374077	0.423773	1.67391	1.04855	0.099891	-1.96305	0.763474	0.912015	0.505267	-0.392857	0.875043
		63	0.814569	0.957454	3	0.521396	0.336062	1.79631	1.05803	0.0915464	0.438891	0.725618	0.960999	0.658544	0.504221	0.792449
		64	0.872188	0.885	2.98405	0.527541	1.09625	1.61987	1.08694	0.1	-2	0.786701	0.901874	0.793095	0.561771	0.80787
		65	0.846876	1.46063	2.78453	0.3	0.39637	1.30406	1.08823	0.0893896	-1.86604	0.694479	0.7796	0.613828	0.313254	0.880175
		66	1.03068	0.887463	2.93245	0.319085	1.9224	1.27195	1.00513	0.0714313	-1.73094	0.363126	0.295682	0.787931	0.44016	0.855884
		67	0.978016	0.917942	2.93815	0.3	1.19994	1.31448	1.11243	0.0964154	-1.91346	-0.157075	0.306933	0.758357	0.364995	0.874843
		68	0.742696	0.898185	3	0.341164	0.497841	1.70472	1.08093	0.0815691	-1.59409	0.694689	0.942338	0.685585	0.129687	0.848196
		69	0.837731	0.894896	2.66872	0.338317	0.443885	1.45874	1.02448	0.1	-1.95967	0.00498364	0.728408	0.687988	0.242525	0.874697
		70	0.854203	0.927054	2.93338	0.352923	0.580445	1.39496	1.14521	0.0999681	-1.71907	0.4704	0.78746	0.712998	0.328439	0.864118
		71	1.03194	0.923874	2.97016	0.305966	1.11415	1.16179	1.02474	0.0994988	-1.97585	0.68883	0.128276	0.759655	0.433943	0.87953
		72	0.910302	0.89354	2.96155	0.362253	1.13354	1.45297	1.06928	0.098519	-1.88359	0.583869	0.726215	0.766978	0.398829	0.850193
		73	0.934356	0.885149	2.99981	0.316963	1.20882	1.34288	1.00559	0.0835109	-1.91517	0.777351	0.617556	0.763661	0.337429	0.859797
		74	1.12253	0.885073	0.533973	0.3	2.65856	1.03727	1	0.0992277	-1.8424	0.511576	-0.885679	0.743195	-0.0421722	0.898803
		75	0.875438	0.885731	2.97771	0.461384	0.704665	1.56523	1.02123	0.087541	-1.9011	0.402083	0.826743	0.765763	0.498225	0.841317
		76	1.01889	0.894491	2.00608	0.30546	0.449949	1.00474	1.05272	0.0981913	-1.93768	-0.0665152	-0.393483	0.658034	0.30736	0.904979
		77	0.944348	0.885	2.86721	0.637864	1.18325	1.50904	1.06618	0.1	-1.92752	0.598301	0.808001	0.809586	0.699882	0.80508
		78	0.942885	1.11467	2.62577	0.301993	0.428624	1.09432	1	0.1	-1.56926	0.41186	0.359373	0.642465	0.371435	0.892767
		79	0.992612	0.894806	2.972	2.9683	0.654817	1.39889	1.05401	0.0892181	-1.97692	-1.74059	0.646243	0.84224	0.889421	0.668429
		80	0.992789	0.923823	2.99879	0.444039	1.14832	1.40359	1.05866	0.0722098	-1.99731	0.656231	0.56907	0.791441	0.615715	0.844784
		81	0.823301	0.885	2.96725	0.536924	0.394915	1.60804	1.05217	0.1	-1.90448	0.421692	0.913215	0.746727	0.51377	0.834884
		82	0.924993	0.893344	2.97145	0.418452	1.187	1.54156	1.03257	0.0871253	-1.92199	0.37115	0.728529	0.784129	0.503214	0.838322
		83	0.735966	0.952265	2.87412	0.3	0.361986	1.60136	1.00638	0.1	-1.92387	0.43931	0.913864	0.633126	0.0408971	0.868346
		84	0.983836	1.07084	0.919884	0.3	0.628137	1.10212	1.01661	0.1	-1.97357	0.366408	-0.175369	0.582447	0.117773	0.904876
		85	0.9232	0.888916	2.92452	0.304961	1.18028	1.36922	1.00983	0.0857802	-1.85101	0.336536	0.589153	0.754004	0.297801	0.86325
		86	0.865108	0.885	3	1.04385	0.44821	1.66174	1.02653	0.0961557	-1.8418	0.739078	0.950253	0.794974	0.792208	0.768375
		87	0.865291	0.895758	2.998	1.14842	0.389331	1.80596	1.05636	0.0990862	-1.21622	0.401807	0.953797	0.805769	0.815706	0.758617
		88	0.726092	0.975042	1.37497	0.3	0.532181	1.65831	1.01312	0.1	-1.45172	0.523549	0.917119	0.574416	-0.134476	0.869588
		89	0.920388	0.885277	2.99444	0.343305	1.25105	1.44343	1.07125	0.0860713	-1.97788	0.758699	0.703193	0.771272	0.374063	0.850497
		90	0.875922	1.46996	1.47383	0.300277	0.517013	1.26579	1.01236	0.098885	-1.75815	0.670904	0.640248	0.563811	0.181717	0.890703
		91	1.08223	0.90795	2.64556	0.407102	0.45911	1.05401	1.00202	0.1	-1.9132	0.222698	-0.376269	0.734364	0.599114	0.889732
		92	1.15304	0.899809	2.96309	0.32406	1.18721	1.00771	1.32464	0.0983231	-1.86871	0.0542046	-0.745314	0.773293	0.555891	0.890079
		93	0.870371	0.88775	2.95658	0.976979	0.501659	1.65755	1.00486	0.0989003	-1.98337	0.726121	0.943191	0.793899	0.780585	0.77531
		94	0.944348	0.885	2.94484	0.631343	1.18325	1.50904	1.06618	0.1	-1.94179	1.04939	0.842072	0.8094	0.700487	0.802518
		95	0.965479	0.885299	2.95884	1.45683	0.651941	1.60225	1.00501	0.0968956	-1.9437	0.345255	0.850298	0.825862	0.878396	0.753972
		96	1.00317	0.901785	2.91004	0.318118	0.630404	1.04651	1.05146	0.099688	-1.9864	0.400727	0.0779375	0.730248	0.412285	0.888436
		97	0.911157	1.07853	0.563814	0.312719	0.441864	1.01326	1.01215	0.0999229	-1.75603	0.387866	0.0811307	0.502469	-0.079764	0.909262
		98	0.881704	0.885	3	0.426819	0.639346	1.53919	1.04818	0.0725178	-1.94884	0.462864	0.78721	0.75575	0.464056	0.850625
		99	0.846351	0.894695	2.99788	0.380578	0.552891	1.46248	1.04951	0.0916927	-1.78498	0.10561	0.797814	0.72786	0.356898	0.858542
		100	0.933377	0.88616	2.94225	0.33908	0.681137	1.31974	1.07326	0.0981898	-1.53658	0.152722	0.504398	0.734132	0.37492	0.874816
		101	0.844757	0.938307	2.96392	0.612232	0.575164	1.70085	1.02935	0.0933323	0.120405	0.635222	0.959376	0.749197	0.613595	0.792137
		102	0.9901	0.886482	2.95499	0.3	1.19082	1.34349	1.00564	0.0837385	-1.91624	0.304628	0.300562	0.764139	0.359573	0.874544
		103	0.911157	0.893312	2.96393	0.312463	0.441864	1.08921	1.01346	0.0996559	-1.91311	0.387866	0.458972	0.692387	0.297734	0.883515
		104	1.34686	1.27629	0.599915	0.331981	2.92691	1.02028	1.08179	0.001	-1.9716	0.434661	-2.61168	0.755502	0.335122	0.90528
		105	0.81633	1.23958	3	0.3	0.401234	1.66276	1.04243	0.0975474	-2	0.00352182	0.815681	0.646082	0.270015	0.8755
		106	1.0107	0.885	3	0.304993	1.23723	1.26714	1.03471	0.1	-1.70223	0.338736	0.23595	0.765732	0.390923	0.875328
		107	0.69854	0.885533	2.63206	0.300094	0.394359	1.67035	1.00023	0.0941837	-1.87122	0.492257	0.935673	0.627366	-0.0802275	0.860112
		108	0.911157	1.07853	1.61206	0.312719	0.441864	1.08942	1.01219	0.099813	-1.75603	0.387866	0.370634	0.588419	0.229483	0.89562
		109	0.833459	0.944784	2.79302	0.631708	0.552619	1.53332	1.0743	0.0692021	-0.0531564	0.519738	0.956825	0.744346	0.609204	0.796044
		110	0.933454	0.887548	2.95912	2.85732	0.56997	1.60488	1.00378	0.0967427	-1.58858	0.429295	0.931281	0.830635	0.88196	0.704021
		111	1.14514	0.889573	0.535496	0.3	2.80623	1.08888	1.04489	0.0999901	-1.93982	0.415014	-1.06248	0.751531	-0.0212015	0.899945
		112	0.965309	0.892814	2.97207	0.395061	1.14592	1.40415	1.21767	0.0859549	-1.91262	0.400383	0.576059	0.78367	0.509182	0.849325
		113	0.851585	0.885122	2.98955	0.568307	0.568292	1.66344	1.07761	0.099718	-1.93007	0.790194	0.91684	0.771758	0.57377	0.821538
		114	0.992718	0.89518	2.99853	0.53981	1.15583	1.39712	1.05247	0.0908595	-1.92749	0.700433	0.645608	0.805274	0.688041	0.829712
		115	0.829753	0.885	3	0.649561	0.448394	1.69324	1.13282	0.1	-1.77618	0.926895	0.948471	0.769406	0.609234	0.806914
		116	0.814569	0.885191	3	0.65745	0.344955	1.79631	1.05803	0.0920796	-1.82055	0.725618	0.950937	0.754581	0.600351	0.811336
		117	0.693043	0.889311	1.32531	0.30094	0.397769	1.68856	1.04495	0.0722397	-1.82839	0.509574	0.924988	0.558983	-0.242989	0.870897
		118	0.99442	0.927093	2.98038	0.569	1.14977	1.53908	1.00194	0.0819358	-1.97069	0.462037	0.654638	0.804755	0.725895	0.824377
		119	1.39438	1.36105	0.5	0.3	2.92072	1.00595	1	0.001	-1.72524	0.104917	-3.4147	0.751761	0.281616	0.914224
		120	0.944302	0.885	2.97635	0.611393	1.18813	1.52379	1.05427	0.1	-1.94676	1.10736	0.841856	0.808272	0.690583	0.804538
		121	1.02251	0.889976	2.98381	0.61237	1.20881	1.4477	1.17072	0.1	-1.86951	0.438974	0.575761	0.809443	0.752085	0.820304
		122	0.98693	1.36631	1.26057	0.307634	0.541892	1.05087	1.07673	0.0870082	-1.9506	0.256509	0.0192954	0.571843	0.256441	0.9048
		123	0.979905	0.885471	2.96147	0.479446	1.19341	1.30815	1.23345	0.0869855	-1.91813	0.673838	0.633714	0.800133	0.616176	0.834261
		124	0.977856	0.904571	2.92899	2.02924	0.668902	1.54932	1.42464	0.0902991	-1.89834	0.374429	0.865057	0.828971	0.8987	0.722416
		125	0.932151	0.891015	2.97646	0.6038	0.602914	1.42151	1.22476	0.0976357	-1.89483	0.402813	0.759367	0.78918	0.680938	0.830187
		126	0.843959	0.915659	2.98939	0.535622	0.468917	1.67086	1.05357	0.0997252	-1.93125	0.809908	0.916003	0.751764	0.552435	0.830488
		127	0.855075	0.927054	2.92924	0.327352	0.580445	1.39384	1.14705	0.0999681	-1.84342	0.46807	0.754537	0.706475	0.278771	0.869976
		128	0.742696	0.898185	2.96704	0.373171	0.498859	1.70472	1.08093	0.0815691	-1.59409	0.694689	0.946196	0.694536	0.191732	0.840766
		129	1.01889	0.894491	2.95613	0.394775	0.435219	1.02805	1.05272	0.0981913	-1.93768	-0.0665152	0.0149798	0.739503	0.553903	0.886843
		130	0.825099	0.885703	2.99389	0.422671	0.566323	1.55214	1.0018	0.0874346	-1.94485	0.857623	0.897758	0.73786	0.385585	0.843949
		131	0.770953	0.908796	2.9529	0.402118	0.567839	1.67278	1.0179	0.096931	-1.92001	0.383647	0.930207	0.718678	0.294275	0.838284
		132	0.934356	0.885	2.95338	0.3	0.628717	1.34288	1.0096	0.0998822	-1.91589	0.376752	0.420947	0.720795	0.292634	0.882662
		133	0.938072	0.886621	2.04861	0.31722	0.391714	1.04575	1.02138	0.0992574	-1.55871	0.21769	0.197585	0.643402	0.247636	0.895418
		134	0.890264	0.885149	2.99981	0.494034	1.16017	1.6365	1.1408	0.0835109	-1.92745	0.777351	0.874617	0.791721	0.550783	0.814561
		135	1.1534	0.885122	2.66529	1.0848	1.26501	1.02939	1.04587	0.0990822	-1.97318	-0.0575633	-0.0376568	0.821349	0.895144	0.808178
		136	0.877772	0.886846	2.97848	1.06548	0.588033	1.4393	1.05582	0.0999457	-1.99938	0.678338	0.940694	0.803148	0.804953	0.75581
		137	0.89122	0.887022	2.94942	2.85433	0.560228	1.55991	1.02687	0.0976874	-0.185395	0.125932	0.950401	0.833119	0.873105	0.686677
		138	0.871129	0.885	2.90975	0.3	0.505772	1.47043	1.19258	0.08675	-1.93585	0.423622	0.650779	0.699893	0.211299	0.8753
		139	0.920054	0.889117	2.82325	2.9614	0.499735	1.6582	1.05205	0.1	-0.936416	0.35232	0.939646	0.835855	0.883761	0.700254
		140	1.03561	0.885149	2.98663	0.355013	1.19722	1.15213	1.01727	0.0995076	-1.91517	0.787454	0.233952	0.780846	0.505823	0.867625
		141	0.979754	0.885	2.9765	0.643734	1.17507	1.31914	1.08139	0.0887391	-1.95616	0.359598	0.701936	0.816527	0.739307	0.807122
		142	0.858222	0.890743	2.95499	0.3	0.447833	1.34288	1.06803	0.0845463	-1.91517	0.303786	0.656981	0.686706	0.201793	0.8813
		143	0.854203	0.886955	2.90784	0.351383	0.580445	1.39972	1.14521	0.0999681	-1.71907	0.459667	0.775386	0.718191	0.299415	0.864666
		144	0.76619	0.885679	2.75059	0.394653	0.364114	1.6691	1.00129	0.0985927	-1.09597	0.478719	0.936577	0.678808	0.236977	0.851596
		145	1.1145	0.917859	2.71425	0.343339	1.1627	1.00523	1.06072	0.0908464	-1.96335	-0.161239	-0.50629	0.768421	0.551419	0.888053
		146	1.1893	0.889825	2.97039	0.300003	1.06259	1.02174	1.01231	0.0996991	-1.97469	0.414134	-1.17002	0.766796	0.531322	0.895011
		147	0.913494	0.909556	2.9994	0.643652	1.00904	1.66209	1.01527	0.0971904	-1.86592	0.754209	0.885489	0.803019	0.702201	0.801475
		148	0.823529	0.92491	2.9954	0.403968	0.306833	1.56012	1.00402	0.0874309	-1.83261	0.16115	0.841661	0.69553	0.38048	0.863875
		149	0.924955	0.932002	2.01674	0.3	0.3	1	1.05586	0.1	-1.46573	0.0307038	0.190013	0.605715	0.219743	0.899925
		150	1.32817	0.885	1.29256	0.3	2.98445	1	1.01911	0.0993545	-1.97929	0.357469	-2.48334	0.769978	0.391288	0.901103
		151	0.898559	0.895483	2.95351	0.307057	1.01651	1.46205	1.05162	0.0864132	-1.91433	0.382059	0.661983	0.744664	0.278443	0.864063
		152	1.16274	0.885	2.79755	0.311139	1.60824	1	1.18236	0.1	-1.75704	0.821701	-0.591565	0.779916	0.515195	0.880226
		153	0.943407	0.885	2.93447	0.511843	0.674068	1.52271	1.02052	0.0997876	-1.85462	0.380038	0.677128	0.781282	0.612391	0.844244
		154	0.81633	1.32973	3	0.3	0.401234	1.66276	1.04243	0.0975474	-2	0.00352182	0.824138	0.641109	0.284129	0.875353
		155	0.905032	0.891215	2.95214	1.09079	1.10931	1.64227	1.01039	0.085908	-1.97196	0.980354	0.940691	0.822888	0.826295	0.737599
		156	0.865562	0.904726	2.99491	0.623162	1.10618	1.8078	1.00006	0.0891449	-1.80376	1.52502	0.949502	0.796004	0.638905	0.779918
		157	0.982173	0.928344	2.75525	0.307462	0.702094	1.01559	1.04526	0.0982043	-1.92049	0.368008	0.180557	0.71899	0.374186	0.884788
		158	0.98693	1.27859	1.26057	0.307634	0.541892	1.05087	1.07673	0.0870082	-1.9506	0.256509	-0.0182989	0.577329	0.256569	0.904696
		159	0.697806	1.14039	1.32531	0.306715	0.392142	1.66628	1.04858	0.0939137	-1.45267	0.595405	0.936045	0.530583	-0.121184	0.869733
		160	0.865291	0.895758	2.998	1.14842	0.605008	1.80596	1.05636	0.0990862	-1.21622	0.401807	0.950941	0.813703	0.816394	0.745109
		161	0.9901	0.886482	2.95499	0.3	1.48202	1.34349	1.00564	0.0837385	-1.91624	0.304628	0.357703	0.774742	0.360114	0.867261
		162	0.991085	0.893812	2.94143	1.82659	0.639978	1.54553	1.08682	0.1	-1.87658	-0.623736	0.738996	0.837043	0.895971	0.728657
		163	0.844171	0.885	2.59302	0.974235	0.707228	1.67551	1.09241	0.0851847	-0.145485	0.721479	0.959391	0.787239	0.719835	0.745902
		164	0.911157	1.63949	0.563814	0.312719	0.441864	1.01326	1.01215	0.0999229	-1.75603	0.387866	0.299083	0.485737	0.0187592	0.90708
		165	0.761921	0.935639	2.95161	0.359094	0.534652	1.65893	1.07009	0.0957247	-1.93117	0.849742	0.936184	0.693676	0.214599	0.846761
		166	0.764845	0.885983	2.9529	0.402118	0.559363	1.67245	1.05141	0.0996675	-0.721047	0.686473	0.953058	0.702895	0.260316	0.831997
		167	0.767483	0.90893	2.9529	0.402348	0.600545	1.67278	1.01415	0.0996594	-0.492851	0.943389	0.954842	0.699521	0.274338	0.824103
		168	0.929591	1.06996	0.906	0.309693	0.458232	1.01775	1.13787	0.0948992	-1.93956	0.33763	0.0938037	0.542323	0.0753583	0.905029
		169	0.977856	0.904571	2.82098	2.02924	0.668902	1.54932	1.42464	0.0902991	-1.89834	0.374429	0.853345	0.829317	0.900115	0.72441
		170	1.10268	0.885158	2.8123	0.410809	1.6284	1.11142	1.01862	0.0783583	-1.76786	0.689673	0.0395361	0.795403	0.624816	0.856215
		171	0.911157	0.893312	2.96393	0.312463	0.441864	1.08921	1.01346	0.0567641	-1.91311	0.387866	0.46348	0.694384	0.304567	0.880375
		172	0.90446	0.887416	2.84134	0.487976	0.620084	1.61105	1.02992	0.0938173	-1.95722	0.323883	0.752554	0.766021	0.546925	0.844382
		173	0.761921	0.935639	2.95161	0.359094	0.534652	1.65893	1.07009	0.0957247	0.470883	0.126903	0.954102	0.675179	0.202965	0.841115
		174	1.14637	1.49369	0.521917	0.3	1.6964	1.08888	1.06118	0.1	-1.93982	-0.256279	-1.04435	0.672223	0.148666	0.909939
		175	0.870439	1.40803	1.70056	0.3	0.496678	1.25521	1.01943	0.0753354	-1.82988	0.203848	0.62767	0.576589	0.221817	0.89033
		176	0.959996	0.909189	2.9541	0.372804	1.0787	1.39938	1.08467	0.1	-1.93219	0.0919262	0.519646	0.772012	0.47903	0.85992
		177	0.981625	0.885004	2.99943	0.3	0.410203	1.04318	1.09715	0.1	-1.79192	0.304335	0.0705457	0.701714	0.343626	0.894883
		178	0.952729	1.06494	0.570097	0.325469	0.444577	1.11014	1	0.0996064	-1.48979	-0.686085	-0.281996	0.514172	-0.0181385	0.913001
		179	0.950364	1.27454	1.26057	0.325527	0.529547	1.05087	1.07673	0.0871637	-1.9698	0.256509	0.215856	0.572567	0.251778	0.899883
		180	1.10268	0.885158	2.8123	0.3	1.81236	1.11142	1.19095	0.0942803	-1.7667	0.457775	-0.187	0.782603	0.449811	0.874699
		181	0.982104	0.904537	3	1.00303	0.682301	1.36977	1.07495	0.1	-1.91417	0.656353	0.790951	0.819339	0.857234	0.788125
		182	0.960108	0.895544	2.96284	1.20151	0.546536	1.64643	1.00014	0.0964363	-1.92068	0.396381	0.839621	0.815831	0.866884	0.773435
		183	0.839883	0.885	2.77558	0.55003	1.09866	1.66915	1.00308	0.0864596	0.0744325	1.49339	0.959252	0.756478	0.512205	0.772832
		184	0.894737	0.895412	2.93605	0.307462	0.40754	1.48677	1.04106	0.0982043	-1.94538	-0.0479885	0.509061	0.691844	0.267789	0.882106
		185	0.823084	0.88504	2.99806	0.404249	0.611519	1.68016	1.02832	0.0877833	-1.94978	0.434084	0.883105	0.741954	0.359209	0.847112
		186	1.1145	0.929554	2.94798	0.339322	0.678503	1.00523	1.06072	0.0818698	-1.96528	-0.161239	-0.667035	0.748414	0.569394	0.897
		187	0.843902	0.929464	2.89412	0.599269	1.21247	1.63176	1.07815	0.0974591	-0.0571539	0.678018	0.955386	0.776769	0.598607	0.771586
		188	0.962381	0.885	2.90222	2.53218	0.703217	1.60141	1.02478	0.0957621	-1.86922	0.396625	0.889996	0.832088	0.887972	0.714786
		189	0.82091	0.894434	3	0.42669	0.497481	1.56946	1	0.0863783	-1.95152	0.909362	0.903182	0.729436	0.390771	0.845347
		190	0.865291	0.895758	2.99994	1.14842	0.389331	1.80191	1.05636	0.0990862	-0.958963	0.401807	0.955946	0.805067	0.814798	0.756756
		191	0.976045	0.886423	2.97424	0.413969	1.15447	1.40777	1	0.0918647	-1.87917	0.337669	0.545804	0.788663	0.541417	0.850897
		192	1.02856	0.897029	2.80698	0.306033	0.788792	1.12075	1.10103	0.0949381	-1.83712	0.0967403	-0.0804418	0.73711	0.403416	0.89165
		193	0.921956	0.885157	2.91784	0.909799	0.559486	1.58538	1.01978	0.0971688	-1.91056	0.487829	0.869215	0.80435	0.794381	0.793733
		194	0.951923	0.889042	2.96923	0.378449	1.11781	1.40158	1.03387	0.0981919	-1.94973	0.739256	0.623646	0.77676	0.466342	0.85422
		195	0.96938	0.905113	2.93576	2.76841	0.944037	1.64326	1.01067	0.099575	-1.83864	0.409496	0.902756	0.836605	0.894941	0.700093
		196	1.05655	0.885	2.93829	2.74014	0.673114	1.4298	1.02494	0.1	-1.91802	-1.59909	0.406468	0.840698	0.892228	0.709263
		197	0.850578	0.89107	2.98111	0.641811	1.00126	1.67972	1	0.0662363	-1.82051	0.70718	0.937255	0.798479	0.635662	0.782742
		198	0.938572	0.89181	2.94763	1.53904	0.753106	1.57289	1.36995	0.091887	-1.86047	0.361024	0.907986	0.828508	0.877263	0.729516
		199	0.8493	1.37346	0.639775	0.314929	0.694148	1.37534	1.09805	0.0988173	-1.87308	0.0521673	0.614707	0.550742	-0.0276516	0.895209
		200	0.847105	0.888609	2.98962	0.544178	0.45991	1.57355	1.00789	0.0886522	-1.91722	0.246991	0.882097	0.759713	0.554321	0.833395
		201	0.942885	1.11467	2.18301	0.301993	0.428624	1.09432	1	0.1	-1.56926	0.41186	0.306067	0.618869	0.328829	0.895433
		202	0.920054	0.889117	2.82243	2.9614	0.623454	1.34072	1.05205	0.0999968	-0.915085	0.35232	0.942791	0.837968	0.883837	0.689876
		203	0.793027	0.890963	2.9711	0.417672	0.76322	1.6859	1.08371	0.0693727	-1.61246	0.985818	0.944161	0.741299	0.339281	0.823141
		204	0.938602	0.913734	2.95884	1.45683	0.638314	1.60225	1.00501	0.0967868	-1.9437	0.226513	0.896492	0.822397	0.885733	0.742759
		205	0.847215	0.885	2.98938	0.48	0.45924	1.43698	1.07644	0.099718	-1.93392	0.695891	0.870004	0.742652	0.482471	0.843742
		206	0.928148	0.9085	2.0079	0.300008	0.387059	1.04595	1.22207	0.0970536	-1.89643	0.402529	0.232372	0.632472	0.208793	0.895083
		207	1.1893	0.890703	2.97076	1.99221	0.675841	1.02174	1.024	0.0996991	-1.90031	0.417524	-0.102751	0.825729	0.903481	0.785101
		208	0.994432	0.894085	2.97113	0.403959	1.1786	1.40342	1.01086	0.0871747	-1.89483	0.402813	0.477173	0.787403	0.549478	0.853911
		209	0.888326	0.891561	2.97448	0.312458	1.0938	1.49223	1.23633	0.0849884	-1.966	0.664986	0.737057	0.751602	0.274873	0.855492
		210	0.956369	0.931981	2.9327	0.3	1.2685	1.43643	1	0.0945007	-1.88926	0.168142	0.47134	0.756176	0.350211	0.868989
		211	0.837124	0.953118	2.99559	0.582999	0.426877	1.68166	1.04772	0.0881408	-1.99934	0.730473	0.932178	0.747589	0.6037	0.82435
		212	0.855075	0.891743	2.92924	0.327352	0.574005	1.39384	1.07809	0.0999681	-1.84528	0.242763	0.726657	0.710227	0.259133	0.870953
		213	0.875622	0.885743	2.86163	0.40397	0.704665	1.56523	1.00157	0.0996153	-1.90114	0.238718	0.768356	0.748881	0.413259	0.854097
		214	0.892275	0.909127	2.91698	0.312625	0.693759	1.38766	1.07994	0.0991429	-1.91373	0.406387	0.633344	0.719008	0.285101	0.874295
		215	0.938072	1.45516	1.99494	0.31722	0.391714	1.04575	1.08829	0.08918	-1.59812	0.115406	0.38592	0.576051	0.346389	0.896277
		216	0.761921	0.893382	2.97007	0.359094	0.534652	1.65893	1.07003	0.0844137	-1.98045	0.421538	0.92316	0.704049	0.197029	0.847861
		217	0.939812	0.885256	2.9955	0.3049	1.13904	1.31818	1.13105	0.0862753	-1.95143	0.747922	0.565959	0.759256	0.31586	0.864786
		218	0.896268	0.886725	2.00552	0.3	0.3	1.03942	1.02051	0.0726725	-1.53099	0.158902	0.331183	0.609727	0.160238	0.894965
		219	0.964961	0.909793	2.90269	0.32267	1.27643	1.43089	1.01559	0.0981786	-1.89911	0.419775	0.496906	0.766797	0.391301	0.863479
		220	0.846896	0.899502	2.99487	0.676697	0.617845	1.6621	1.10202	0.0882953	-1.87721	0.850418	0.943556	0.785889	0.654442	0.797552
		221	0.901161	0.8873	1.99785	0.333457	0.3	1.02293	1.01378	0.0702576	-1.58177	0.367673	0.379453	0.622567	0.234395	0.88924
		222	0.971613	0.908563	2.98909	0.413768	1.17493	1.53988	1.0532	0.0984226	-1.90841	0.413592	0.594018	0.786373	0.550318	0.84614
		223	0.910879	0.885149	2.95917	1.16375	0.728554	1.63708	1.00373	0.0859498	-1.93292	0.979202	0.937441	0.815602	0.835408	0.752804
		224	1.14223	1.50358	0.577175	0.3	2.7779	1.11924	1.06682	0.0989043	-1.94869	0.754109	-0.424023	0.741652	0.16759	0.888524
		225	0.884252	0.885456	3	0.374859	0.639346	1.53919	1.04818	0.0811228	-1.94884	0.462864	0.737005	0.742753	0.388253	0.860654
		226	0.970121	0.887991	2.92131	1.10596	1.17818	1.60739	1.02494	0.0945813	-1.96909	0.689726	0.863224	0.827344	0.854955	0.757794
		227	1.00159	0.885	3	0.319739	0.648261	1.05178	1.00595	0.088289	-2	0.445415	0.105597	0.738673	0.411111	0.886293
		228	0.838548	0.886862	2.99912	0.609201	0.622406	1.75952	1.08126	0.0931574	-1.84154	0.555725	0.933892	0.782108	0.596389	0.80884
		229	1.21808	1.42015	0.5	0.317051	2.78714	1.0362	1.02013	0.1	-1.54504	0.191799	-1.23541	0.739957	0.191528	0.904821
		230	1.1941	0.885	0.659629	0.358068	2.83019	1	1.11945	0.1	-2	0.403976	-1.37516	0.761486	0.156616	0.899291
		231	0.894612	0.886974	2.94942	2.85433	0.560228	1.55984	1.01755	0.0977488	-0.185395	-0.181011	0.947748	0.836444	0.874248	0.68154
		232	0.702099	1.08042	0.688675	0.3	0.333611	1.65495	1.01734	0.0798047	-1.51073	0.658714	0.905677	0.487732	-0.320637	0.881429
		233	0.838548	0.891534	2.99983	0.601378	0.57796	1.63468	1.08262	0.0931574	-1.9124	0.627622	0.930835	0.775989	0.592787	0.813072
		234	0.918855	0.891154	2.95214	1.06915	0.690898	1.64227	1.01092	0.0999784	-1.97402	0.980354	0.924368	0.811801	0.828528	0.76593
		235	0.934952	0.890206	2.94173	1.83976	0.756504	1.57716	1.37982	0.0921834	-1.9542	0.38037	0.917699	0.827404	0.882818	0.714985
		236	0.956106	0.917922	2.95989	1.02064	1.1643	1.65928	1.02902	0.0898618	-1.98334	0.688126	0.887194	0.823085	0.854524	0.758599
		237	0.834206	0.892941	2.79235	0.3	0.3	1.49184	1	0.1	-2	0.210085	0.686716	0.645004	0.155519	0.884926
		238	0.69854	0.885533	2.63206	0.300094	0.319056	1.67035	1.00338	0.0945364	-1.87122	0.187058	0.928348	0.613218	-0.0796971	0.863697
		239	0.91932	0.894807	2.95025	0.553255	1.21361	1.67348	1.04902	0.0968805	-1.91814	0.388685	0.825814	0.8017	0.635521	0.809671
		240	1.20234	0.954656	1.14366	0.306725	2.83713	1.06313	1	0.0879057	-1.98065	0.149615	-1.20375	0.768577	0.329228	0.894465
		241	1.02297	0.889976	2.98528	0.6015	1.20881	1.39006	1.08094	0.0908618	-1.87185	0.439534	0.561483	0.809479	0.747236	0.824058
		242	0.761918	0.956751	2.95161	0.359094	0.533152	1.65893	1.07009	0.0957247	0.322008	0.448997	0.956221	0.674104	0.21066	0.835414
		243	0.858696	0.90893	2.9529	0.402348	0.533727	1.67278	1.01415	0.0996594	-1.95341	0.425417	0.813549	0.734366	0.409603	0.855928
		244	0.939653	0.934267	2.95254	1.56853	0.674907	1.56309	1.08908	0.0817748	-1.94318	0.40852	0.915389	0.821931	0.898066	0.731912
		245	0.898337	0.885912	2.98134	0.318077	1.17853	1.44826	1.02293	0.0862753	-1.97787	0.747922	0.723893	0.757766	0.296903	0.855378
		246	0.80463	0.917949	2.91999	0.723088	0.511918	1.68895	1.11931	0.096411	-0.226084	0.165456	0.956797	0.763927	0.634746	0.783231
		247	1.04159	0.909221	2.96522	0.737537	1.08295	1.27744	1.01885	0.0955882	-1.94534	0.69147	0.57272	0.815347	0.824885	0.814043
		248	0.909868	0.8855	3	0.505	1.01821	1.65565	1.03139	0.0984664	-1.82778	0.65394	0.833182	0.790561	0.580771	0.824279
		249	0.838548	0.891534	2.99881	0.612249	0.409884	1.63306	1.06032	0.0931574	-1.92414	0.396522	0.9177	0.76281	0.601173	0.823213
		250	0.921331	0.885564	2.91702	0.312002	0.694148	1.39317	1.07967	0.0985934	-1.91918	0.406387	0.521682	0.728466	0.303337	0.876167
		251	0.891722	0.885177	3	0.653778	0.562822	1.61454	1.00233	0.0978527	-1.96136	0.43504	0.86559	0.78615	0.677178	0.819674
		252	0.843902	0.929203	2.67131	0.599269	1.21247	1.63818	1.07815	0.0985179	-0.0284671	0.678018	0.95635	0.769825	0.577363	0.774656
		253	0.770953	0.908796	2.9529	0.447705	0.573164	1.67278	1.02435	0.096931	-1.92001	0.742625	0.944366	0.728699	0.358115	0.827118
		254	0.962627	0.91351	2.9485	0.306206	0.49846	1.07525	1.08041	0.1	-1.893	0.358228	0.235854	0.705452	0.353978	0.88978
		255	0.94025	0.926904	3	0.517654	1.11261	1.49951	1.04871	0.0995872	-1.96838	0.649504	0.783522	0.795164	0.642455	0.825103
		256	0.969701	0.887603	2.99634	2.7472	0.808526	1.36566	1.00623	0.0942823	-1.99926	-1.6886	0.717867	0.843541	0.885597	0.651093
		257	0.761364	0.925987	2.99229	0.334252	0.359041	1.57764	1.09552	0.0994911	-1.8642	0.160057	0.897973	0.667711	0.161488	0.863306
		258	0.846876	0.892075	2.8382	0.3	0.39637	1.30406	1.04528	0.0942963	-1.82663	0.703975	0.700336	0.669562	0.173395	0.880348
		259	1.1534	0.885122	2.6685	0.634406	0.575665	1.02939	1.06657	0.0988649	-1.98602	-0.0575633	-0.57484	0.788853	0.8027	0.870656
		260	0.786757	0.911077	2.95122	0.31586	0.589651	1.67214	1.38371	0.1	-1.94179	0.141742	0.873586	0.704866	0.150534	0.854793
		261	0.867599	0.890624	2.9978	0.404249	0.611519	1.67611	1.02785	0.0873095	-1.82482	0.414471	0.808454	0.746383	0.417205	0.851486
		262	0.739169	0.937984	1.3479	0.320648	0.3	1.56678	1.11827	0.1	-1.84282	0.467045	0.8703	0.543609	-0.0947566	0.879797
		263	1.16986	0.885122	2.98955	2.80621	0.452191	1.02939	1.06648	0.0988532	-1.98616	-0.0371144	-0.0887131	0.818848	0.886435	0.775535
		264	0.705549	0.885	2.88215	0.313704	0.422551	1.63945	1.2354	0.0710838	-1.2103	0.478337	0.945075	0.649148	-0.0154431	0.849432
		265	0.932573	0.942131	2.99716	0.30084	0.393974	1.10336	1.02865	0.0836117	-1.83312	0.190015	0.33694	0.680258	0.329955	0.891385
		266	0.89613	0.940286	3	0.3	0.398488	1.31421	1.05132	0.0637285	-1.89757	0.373674	0.536897	0.679255	0.285952	0.884551
		267	0.786757	0.922445	2.94282	0.32233	0.589651	1.65638	1.039	0.0999837	-1.94173	0.427805	0.888262	0.698711	0.172022	0.860148
		268	0.831805	0.925612	2.88563	0.383778	0.56416	1.66541	1.07412	0.0943106	-1.82961	0.38071	0.857933	0.722392	0.352468	0.854486
		269	1.00108	0.894457	2.74181	2.96425	0.583655	1.47077	1.05653	0.0716199	-1.93102	0.0838362	0.762397	0.832861	0.901476	0.724713
		270	1.0073	0.892794	2.97429	0.459326	1.21074	1.38534	1.05144	0.0693933	-1.89761	0.699774	0.531841	0.796387	0.626003	0.841888
		271	0.81409	0.889034	2.95182	0.518961	0.337661	1.72521	1.00435	0.0915464	-1.88567	0.403696	0.91803	0.731299	0.487053	0.839378
		272	0.913494	0.909319	2.84863	0.856441	1.01012	1.66231	1.00774	0.0971904	-1.86696	0.764095	0.914601	0.813243	0.78125	0.773683
		273	0.964361	0.915244	3	0.372804	1.17889	1.37777	1.08673	0.1	-1.99703	0.41713	0.559347	0.778319	0.489369	0.855369
		274	1.01896	0.913734	2.83492	0.303529	0.651941	1.1047	1.00501	0.1	-1.71007	-0.0506837	-0.0882347	0.719692	0.400492	0.895916
		275	0.841645	0.885	2.89308	0.59425	0.54403	1.6042	1.01509	0.093819	-1.77095	0.658535	0.924493	0.768991	0.576854	0.818805
		276	0.892874	0.895455	2.97688	0.384484	0.551969	1.4655	1.08703	0.0997539	-1.91434	0.334896	0.694271	0.735752	0.415967	0.864907
		277	1.06359	1.39985	1.01118	0.311628	0.453259	1	1.05945	0.0516162	-1.80917	-0.453182	-0.715772	0.545479	0.26775	0.910949
		278	1.00027	0.901785	2.95173	0.318118	0.630404	1.04651	1.05159	0.099688	-1.57031	0.366603	0.12416	0.727206	0.411581	0.887082
		279	0.820774	0.893159	3	0.511407	0.416941	1.68058	1.06348	0.0963016	-1.90014	0.826808	0.928264	0.741467	0.490331	0.833172
		280	0.926023	0.90175	2.98939	1.45363	1.11818	1.67216	1.01821	0.0995954	-1.93007	0.761087	0.935909	0.828096	0.875764	0.717942
		281	0.90389	0.885	2.90044	0.3	1.22778	1.45201	1	0.0806399	-2	0.370488	0.649948	0.754801	0.26001	0.85961
		282	0.959099	0.885	3	2.99317	0.784707	1.38248	1.05001	0.1	-1.73728	-1.92882	0.728257	0.847095	0.881386	0.634423
		283	1.30705	1.22234	0.661	0.3	2.85535	1.03074	1.03236	0.001	-1.92834	0.455224	-2.2382	0.752955	0.310519	0.90385
		284	0.877226	0.88775	2.9994	0.976979	0.602411	1.65755	1.00486	0.0990422	-1.98337	0.72605	0.941833	0.803189	0.788363	0.77004
		285	1.01889	0.886907	2.82058	0.30546	0.442894	1.00474	1.05294	0.0938134	-1.93778	-0.0665152	-0.230357	0.703228	0.384916	0.900517
		286	1.05484	0.922501	3	0.40781	0.435875	1.03829	1	0.1	-1.92749	0.418385	-0.0809753	0.742528	0.617077	0.885437
		287	0.913083	0.885	2.95718	0.571795	0.509547	1.49534	1.00391	0.089979	-1.96201	0.526204	0.779684	0.772266	0.637129	0.839067
		288	0.786862	0.922591	2.95156	0.44904	0.59741	1.65495	1.03958	0.0987891	-0.464837	0.924387	0.956253	0.713932	0.377882	0.817267
		289	0.854203	0.93086	2.86155	0.39961	0.593853	1.52921	1.14798	0.0998292	-1.70491	0.405626	0.829397	0.727154	0.404329	0.854085
		290	0.718202	0.986212	2.97019	0.3	0.484887	1.66614	1.09861	0.0885761	-1.44846	0.561954	0.941931	0.645955	0.031732	0.853937
		291	0.814569	0.885191	2.99497	0.65745	0.315405	1.80409	1.05803	0.0920796	-1.73076	0.36447	0.944655	0.757301	0.601959	0.815283
		292	0.844171	0.885004	2.99293	0.974235	0.707228	1.66715	1.04932	0.0855208	-1.95302	0.721479	0.947379	0.809987	0.763319	0.749606
		293	0.761921	0.914984	2.99882	0.323079	0.408581	1.67278	1.01415	0.0996725	-1.99422	0.824142	0.917178	0.667802	0.126846	0.862153
		294	1.0174	0.907076	2.97372	1.3242	0.651941	1.38201	1.00501	0.0999396	-1.97097	-0.0506837	0.676191	0.827411	0.897405	0.773091
		295	0.913494	0.909556	2.9994	0.856441	1.01012	1.66454	1.00728	0.0971904	-1.86967	0.754209	0.919918	0.815544	0.792773	0.77117
		296	0.939011	0.886435	2.99825	1.08315	0.721912	1.53587	1.0683	0.0765583	-1.9197	0.370673	0.875187	0.821853	0.842935	0.76729
		297	0.76619	0.885679	2.98954	0.394653	0.364114	1.6743	1.00123	0.0990845	-1.97085	0.478719	0.925495	0.691132	0.258802	0.853655
		298	0.949102	0.88775	2.95658	0.976979	0.501659	1.65592	1.08489	0.0989003	-1.98337	0.37212	0.820083	0.806836	0.827793	0.791177
		299	0.807356	0.912634	2.98225	0.441537	0.637915	1.61718	1.20881	0.0991945	0.403064	0.712035	0.958161	0.719946	0.385379	0.810058
		300	0.902059	0.906815	2.97646	0.6038	0.602914	1.42168	1.2411	0.0976357	-1.89483	0.389634	0.83242	0.782251	0.663281	0.823712
		301	0.96938	0.885	2.97583	2.76841	0.933119	1.62851	1.01729	0.0988972	-1.87339	0.39463	0.897743	0.837316	0.884488	0.702424
		302	0.91241	0.887894	2.99998	1.15176	1.13435	1.4228	1.04809	0.0999427	-1.94767	0.35948	0.919073	0.826633	0.840171	0.721185
		303	0.873192	0.888142	2.96174	0.402275	1.10257	1.69037	1.00057	0.0966504	-1.9765	0.734481	0.851406	0.771817	0.416749	0.835129
		304	0.776464	0.908816	2.95404	0.402348	0.456477	1.67278	1.01415	0.0996594	-1.63083	0.965506	0.941337	0.703509	0.293545	0.842005
		305	0.895408	0.901675	2.84336	1.05605	0.508626	1.66364	1.06048	0.0976273	-2	0.380351	0.915054	0.799736	0.814396	0.774441
		306	0.851585	0.885122	2.98955	0.546832	0.568292	1.66344	1.07761	0.0995849	-1.93007	0.790194	0.911486	0.768667	0.555231	0.825125
		307	0.858523	0.922591	2.9427	0.44904	0.530591	1.61365	1.03681	0.0987891	-1.9248	0.48426	0.847366	0.741627	0.479286	0.849001
		308	0.892275	0.885537	2.91503	0.312625	1.06765	1.52135	1.07941	0.0975293	-1.92136	0.406607	0.695363	0.748895	0.272477	0.860138
		309	1.07986	0.885017	2.71218	0.644455	1.15979	1.00997	1.00001	0.0866037	-1.95683	-0.0853314	0.155937	0.811859	0.777911	0.83043
		310	0.837124	0.953118	2.93688	0.540639	0.47623	1.68166	1.01028	0.0993968	-1.99847	0.730473	0.923526	0.745148	0.5629	0.830463
		311	0.898223	0.8854	2.98191	0.576251	0.563873	1.48306	1.07989	0.0866437	-1.83658	0.381232	0.820621	0.77778	0.630074	0.831707
		312	0.871977	0.924086	2.88944	0.464143	0.585359	1.62169	1.01735	0.0993234	-1.93556	0.421059	0.829534	0.749742	0.509931	0.846477
		313	0.932521	0.890418	3	1.4676	1.02785	1.37944	1.46291	0.1	-2	1.56557	0.946346	0.822866	0.869464	0.710865
		314	0.839856	0.885	3	0.55003	1.10033	1.65107	1	0.0933497	-1.38258	1.49339	0.951314	0.781032	0.541965	0.784757
		315	0.834548	0.886894	2.99901	0.609201	0.636353	1.75952	1.08126	0.0931574	-1.84154	0.555725	0.936583	0.782432	0.592327	0.807117
		316	1.10115	0.885	2.88338	0.301839	1.89152	1.06627	1.21415	0.0935281	-1.75959	0.478793	-0.141902	0.786111	0.457791	0.870843
		317	0.759916	0.957292	1.42272	0.335914	0.359041	1.57764	1.09552	0.0988235	-1.82947	0.509486	0.86211	0.574463	-0.00350648	0.876213
		318	0.906112	0.885	3	0.67978	1.00948	1.737	1.01383	0.0977468	-1.85944	0.87365	0.905184	0.806845	0.702756	0.79346
		319	0.828039	0.890999	2.94014	0.394899	0.587029	1.69197	1	0.0939583	-1.89246	0.482717	0.872401	0.734253	0.349214	0.851471
		320	0.830854	0.885	2.97853	0.474617	0.479612	1.47972	1.02061	0.0998527	-1.92194	0.694728	0.894373	0.7414	0.457013	0.840947
		321	1.22139	0.885158	2.97346	0.306946	1.81287	1.05259	1.18898	0.0984176	-1.90899	-1.05281	-1.4501	0.781559	0.566285	0.888134
		322	0.845561	1.06406	2.90578	0.300023	0.362294	1.30691	1.0057	0.086073	-1.94933	0.42827	0.71101	0.641865	0.260724	0.884467
		323	0.922873	0.889061	2.98828	0.305296	0.46474	1.04834	1.1458	0.099931	-1.83744	0.406405	0.410498	0.697969	0.293403	0.884033
		324	0.904635	0.886425	2.88822	2.02924	0.668902	1.6054	1.04836	0.0897816	-1.90787	0.374429	0.938105	0.821345	0.876411	0.707077
		325	0.713753	0.906667	2.78566	0.3	0.540557	1.82609	1.00156	0.0951973	-1.99763	0.475209	0.935993	0.662965	-0.024485	0.854242
		326	0.871437	0.91543	2.9586	0.526794	0.588596	1.59686	1.05493	0.0935915	-1.9366	0.240401	0.852078	0.766826	0.576787	0.833519
		327	0.936027	0.885359	2.95277	0.339276	0.670026	1.32022	1.07326	0.0981898	-1.92196	-0.158087	0.434541	0.739463	0.380043	0.877403
		328	0.942885	0.886133	2.18301	0.301987	0.428624	1.09432	1	0.1	-1.57996	0.341566	0.199201	0.653873	0.235993	0.894899
		329	1.15304	0.895926	2.96309	0.32406	1.18721	1.1043	1.32944	0.0983231	-1.86871	0.0416702	-0.734248	0.772485	0.553531	0.885292
		330	0.752703	0.952265	2.87412	0.311991	0.361986	1.6026	1.00831	0.1	-1.92387	0.440754	0.904317	0.643736	0.100469	0.869177
		331	0.819866	1.50542	0.55287	0.3	0.724815	1.37323	1.10396	0.0853657	-1.87221	0.72054	0.748333	0.544903	-0.0967689	0.887608
		332	0.742759	1.20631	1.32193	0.3	0.379165	1.59506	1.13168	0.068793	-1.40189	0.565561	0.903167	0.535446	-0.040494	0.875145
		333	0.909868	0.885066	3	0.505	1.25528	1.56829	1.03139	0.0982505	-1.88179	0.751126	0.848838	0.796104	0.580662	0.815254
		334	0.770898	0.908796	2.90347	0.311936	0.55496	1.69157	1.01012	0.0999416	-1.16833	0.378703	0.914629	0.675546	0.108743	0.85939
		335	0.920211	0.888362	2.99931	0.323968	1.19951	1.4201	1.04981	0.0985226	-1.9886	0.761467	0.672799	0.763905	0.336429	0.857364
		336	1.03742	0.940067	2.95702	0.318593	1.93711	1.27234	1.01378	0.0992766	-1.85559	0.527395	0.308588	0.783651	0.474438	0.857773
		337	0.90389	0.885017	2.90523	0.3	1.09504	1.44293	1	0.0806399	-2	0.379915	0.633247	0.748501	0.259877	0.864354
		338	0.97095	0.885	3	0.717414	0.899452	1.5035	1.09361	0.0727961	-1.92313	0.508361	0.755068	0.8153	0.769821	0.807544
		339	0.887193	0.885	2.9465	0.406077	1.19328	1.60005	1	0.1	-1.90197	0.403759	0.807862	0.776833	0.436764	0.833991
		340	0.630317	0.885	0.5	0.304065	0.362477	1.68052	1.05838	0.090816	-1.98162	0.825995	0.928853	0.458869	-0.641207	0.874629
		341	0.876718	1.11702	1.63455	0.3	0.466927	1.10804	1.02599	0.0858735	-1.6324	0.417521	0.532673	0.580322	0.179167	0.890881
		342	0.907076	0.893215	2.87264	2.2028	0.595253	1.56445	1.0141	0.0911143	-0.328369	0.378842	0.953283	0.825759	0.878673	0.701906
		343	0.934356	0.885	2.95404	0.40103	0.55057	1.34288	1.0096	0.0998822	-1.9173	0.39106	0.560264	0.7463	0.477323	0.869307
		344	0.90273	0.89481	2.91827	0.316278	0.718878	1.18577	1.03222	0.0991257	-1.99815	0.68883	0.602112	0.722869	0.295723	0.871616
		345	0.848133	0.892794	2.98939	0.463201	0.610465	1.61473	1.07565	0.0879772	-1.8962	0.412764	0.87322	0.75698	0.47362	0.839544
		346	0.954668	0.891155	2.88231	0.980532	0.655977	1.52071	1.09047	0.0878678	-1.85574	0.393386	0.820432	0.815986	0.829381	0.787225
		347	0.956745	0.885	3	1.39889	0.674299	1.59509	1.00897	0.0962709	-1.92167	0.355082	0.86881	0.825621	0.874035	0.753236
		348	0.855444	0.908157	2.99294	0.679149	0.628369	1.74841	1.09865	0.0930462	-1.86983	0.568235	0.933447	0.788852	0.669825	0.800189
		349	1.01064	1.07377	1.99808	0.311308	0.449949	1.00474	1.05272	0.0995077	-1.70126	-0.481723	-0.242447	0.629027	0.386555	0.904606
		350	1.0211	0.885	3	1.01629	1.15091	1.16872	1	0.1	-2	0.710774	0.721881	0.827915	0.863814	0.769306
		351	0.959643	0.897002	2.91417	0.449199	1.18983	1.49693	1.05571	0.0874604	-1.97831	0.400288	0.650337	0.791726	0.571353	0.839182
		352	0.878353	0.885	2.86809	0.952041	0.499631	1.66135	1.00193	0.0927329	-1.92559	0.394976	0.923342	0.797052	0.773823	0.782479
		353	1.09327	0.887594	2.9832	0.865744	0.457392	1.06842	1	0.0861535	-1.94576	-0.00966577	0.106238	0.806258	0.867492	0.838141
		354	0.865562	0.892547	2.9949	0.637601	1.10618	1.8078	1.00006	0.0891449	-1.79828	0.714899	0.930893	0.801773	0.647379	0.785686
		355	0.81633	0.948438	3	0.3	0.550732	1.66028	1.04273	0.0975474	-1.97881	0.00352182	0.79673	0.69405	0.182905	0.869709
		356	0.792399	0.89878	2.9607	0.431412	0.583296	1.6717	1.05286	0.0960616	-1.64937	0.670107	0.936828	0.731561	0.359816	0.835177
		357	0.854559	0.891173	2.99862	1.07593	0.689508	1.65269	1.01028	0.099718	-1.98994	0.394427	0.942799	0.813143	0.797627	0.741656
		358	0.816072	0.887698	3	0.3	0.394471	1.60541	1.05229	0.0999566	-2	0.00794728	0.76033	0.682584	0.143066	0.876891
		359	0.761921	0.887118	2.95149	0.359094	0.534652	1.65893	1.1938	0.0957247	-1.93117	0.478914	0.926069	0.705368	0.188354	0.847513
		360	0.849511	0.887022	2.94942	1.469	0.560228	1.55574	1.02687	0.0976874	-0.236996	0.125932	0.950433	0.815011	0.831786	0.716379
		361	1.03188	0.885	2.80396	0.335159	0.469475	1.04489	1.09026	0.0805236	-1.85872	0.00210871	-0.197393	0.721014	0.45441	0.895166
		362	1.1907	0.885	2.81017	0.611234	1.62317	1	1.17313	0.0973436	-1.76207	0.836874	-0.236274	0.803576	0.819203	0.839994
		363	1.12552	0.922877	2.97471	0.375101	1.11731	1	1.32691	0.0849919	-1.85073	0.0494745	-0.389895	0.779715	0.629886	0.880167
		364	0.919027	0.885	2.95103	1.0712	1.20601	1.72726	1	0.1	-2	0.723858	0.922831	0.824569	0.827288	0.744219
		365	0.918855	0.891154	2.99985	1.08947	0.690898	1.65269	1.01039	0.0846401	-1.8347	0.99098	0.931089	0.81448	0.834499	0.761152
		366	0.873399	0.908148	2.95935	1.1047	0.558846	1.67931	1.11224	0.0986962	0.0332367	1.04447	0.957975	0.789656	0.807173	0.731961
		367	0.871292	0.88641	2.9993	1.45915	0.679129	1.60179	1.01262	0.0999053	-1.9437	0.70672	0.94786	0.814306	0.846729	0.718013
		368	0.743274	0.958047	2.86663	0.309034	0.403654	1.60858	1	0.0909673	-1.9341	0.461894	0.915403	0.646292	0.0821801	0.865077
		369	0.739169	0.88902	1.40255	0.320648	0.3	1.56208	1.11827	0.1	-1.8211	0.467045	0.867001	0.555748	-0.113469	0.87892
		370	1.01854	0.913734	2.95761	1.45683	0.651941	1.40379	1.00501	0.0946634	-1.98435	-0.0397536	0.692594	0.827947	0.904459	0.764712
		371	0.887284	0.904456	3	0.639062	1.01731	1.76152	1	0.1	-1.91251	0.909271	0.921215	0.800851	0.673242	0.794795
		372	1.10332	0.89269	2.99847	0.410943	1.69405	1.07888	1.06432	0.1	-1.90006	0.823123	0.0978058	0.799232	0.643471	0.852737
		373	0.877772	0.886761	2.97848	0.543423	0.588033	1.51561	1.05462	0.0999457	-1.85474	0.678338	0.865356	0.769947	0.580764	0.831753
		374	0.766278	0.893159	3	0.511407	0.416941	1.68058	1.01343	0.0993132	-1.59993	0.94742	0.950895	0.727534	0.416724	0.819889
		375	0.742696	0.885159	3	0.334465	0.497841	1.70472	1.02944	0.0993021	-1.83919	0.469701	0.931844	0.687492	0.107159	0.852982
		376	0.792647	1.44929	1.58845	0.3	0.477415	1.53615	1.00027	0.1	-1.87192	0.436838	0.849193	0.563933	0.109388	0.882068
		377	0.841055	0.891871	3	0.604374	0.57688	1.63859	1.04398	0.0873282	-1.96994	0.427777	0.921267	0.777604	0.600038	0.813591
		378	0.927424	0.902179	2.92661	0.595665	1.17417	1.6205	1	0.0798668	-1.58167	0.433114	0.839691	0.800136	0.676543	0.805048
		379	1.13441	0.895711	2.35143	0.32271	2.75721	1.0872	1.04919	0.1	-1.91217	0.413934	-0.249129	0.787968	0.483268	0.86302
		380	0.953885	0.886401	2.96309	0.328779	0.541013	1.36513	1.08432	0.0995966	-1.99841	0.0538137	0.326951	0.728427	0.378164	0.882139
		381	0.834151	0.885	2.98449	0.543564	0.450219	1.59074	1	0.089714	-1.89626	0.232977	0.898237	0.757682	0.537038	0.831141
		382	0.919938	0.885	3	0.571795	0.610299	1.49745	1.0039	0.0901209	-1.96357	0.526133	0.781055	0.7835	0.647462	0.835071
		383	0.96938	0.885	2.97583	0.785551	0.933119	1.67529	1.01729	0.0988972	-1.82216	0.39463	0.781108	0.817823	0.790959	0.796549
		384	1.1145	0.918149	2.82972	0.307137	1.1627	1.01951	1.00589	0.0854754	-1.95127	-0.161239	-0.588041	0.762158	0.498062	0.8933
		385	0.963721	0.89297	2.91502	1.02137	0.69935	1.43979	1.0199	0.0859934	-1.99599	0.344243	0.80322	0.820192	0.844198	0.783402
		386	0.931261	1.62438	1.22761	0.300005	0.538427	1.04963	1.06672	0.099452	-1.9506	0.256509	0.355803	0.547437	0.187277	0.899809
		387	0.935107	0.886974	2.93376	2.97992	1.15668	1.258	1.01762	0.0966061	-1.92161	-0.176676	0.909683	0.842642	0.883308	0.643755
		388	1.02421	0.909454	3	1.42468	0.590745	1.39366	1	0.0820553	-2	-0.131968	0.656001	0.825944	0.903312	0.769011
		389	0.878849	0.885425	2.86809	0.938352	0.531051	1.66135	1.08229	0.0994976	-2	0.688514	0.931907	0.794618	0.769029	0.781105
		390	0.815393	0.885	2.89937	0.3	0.311343	1.29339	1.0501	0.1	-1.81835	0.712708	0.765393	0.648169	0.125302	0.879437
		391	0.820665	0.944074	3	0.587613	0.681168	1.73856	1.08074	0.0573892	-1.92077	0.910838	0.949117	0.772157	0.590991	0.799047
		392	0.81409	0.887437	2.99909	0.521396	0.619088	1.72612	1.05803	0.0915464	-1.84059	0.405189	0.931122	0.765542	0.494786	0.819663
		393	0.920567	0.909127	2.91698	0.312625	0.694148	1.38735	1.07994	0.0943489	-1.79003	0.406387	0.540981	0.723015	0.319356	0.875524
		394	0.836236	0.890497	2.98084	0.439138	0.665022	1.57657	1.00941	0.0899024	-1.96251	0.465637	0.88122	0.752969	0.427799	0.840055
		395	0.764845	0.885024	2.95473	0.402118	0.559363	1.67245	1.05141	0.0995071	-1.63847	0.699648	0.943329	0.716307	0.265621	0.836653
		396	1.07986	0.885667	2.64625	1.86901	0.45911	1.05321	1.00472	0.0997742	-1.99276	-0.0827056	0.287	0.819193	0.907685	0.782618
		397	1.06553	0.885207	2.88823	0.318395	1.0444	1.03189	1.05049	0.0987219	-1.96061	0.463504	-0.151113	0.764654	0.459902	0.884264
		398	1.09984	1.45858	0.611002	0.324883	1.66636	1.10512	1.06466	0.0968899	-1.91435	-0.188729	-0.546578	0.669545	0.179477	0.90502
		399	0.903522	0.891533	2.97358	0.612966	1.09475	1.64242	1.01048	0.0862705	-1.9736	0.397082	0.865084	0.804697	0.666115	0.800181
		400	0.959567	0.917183	2.94839	0.446912	1.21046	1.50767	1.05632	0.0876685	-1.98072	0.392354	0.662162	0.790251	0.582522	0.8383
		401	0.853563	0.885704	2.93552	0.591959	1.18541	1.61749	1.08374	0.088107	-0.195537	1.20835	0.957918	0.778927	0.582428	0.769381
		402	0.823529	0.92491	2.9954	0.434049	0.306833	1.5618	1.00402	0.0874309	-1.8412	0.16115	0.859642	0.703711	0.424031	0.858515
		403	0.913743	0.909507	2.99993	0.620225	1.24541	1.58419	1.0593	0.079128	-1.86592	0.754209	0.887274	0.804782	0.69002	0.793144
		404	0.854203	0.886937	2.95147	0.351383	0.580445	1.39972	1.14521	0.0999681	-1.99646	0.459667	0.767123	0.723348	0.303432	0.865238
		405	0.834548	0.956911	2.99993	0.609201	0.354926	1.75952	1.08126	0.0931574	-1.88661	0.549162	0.935422	0.744108	0.621771	0.82294
		406	1.17114	1.60106	0.5	0.3	1.84803	1.04505	1.07274	0.1	-1.93217	-0.414527	-1.20463	0.68268	0.152779	0.911403
		407	0.707276	0.885533	2.6313	0.300094	0.317746	1.65519	1.00494	0.0945364	-1.87246	0.179215	0.922535	0.615554	-0.0634497	0.865847
		408	0.945622	0.885	3	0.508587	1.34033	1.48668	1.0711	0.0894511	-2	0.660137	0.770438	0.80372	0.618386	0.819001
		409	0.985167	0.894815	2.88961	2.92797	0.515134	1.4579	1.02767	0.0929383	-1.83786	-1.89366	0.627756	0.842449	0.894014	0.672233
		410	0.962381	0.885	2.89862	2.44049	0.70463	1.50614	1.02478	0.0997156	-1.82328	0.757267	0.904752	0.829542	0.887683	0.715952
		411	0.801734	1.28823	2.87924	0.3	0.3	1.44251	1.17087	0.1	-1.94969	0.772117	0.853682	0.593289	0.237938	0.876554
		412	0.824321	0.885427	2.90346	0.305426	0.58154	1.55214	1.0018	0.0874346	-1.94485	0.425152	0.796712	0.702494	0.163475	0.870845
		413	0.894172	0.917042	3	0.638505	0.571486	1.58735	1.15125	0.1	-1.93937	0.459221	0.868824	0.782629	0.685359	0.819047
		414	0.88681	0.895169	2.99997	0.640365	0.628627	1.61441	1.00009	0.0989464	-1.96171	1.01301	0.904042	0.783732	0.66684	0.812394
		415	0.951731	0.8886	2.0348	0.3	0.370125	1.02606	1.14554	0.0977937	-1.9787	0.214874	0.0511327	0.636301	0.225738	0.899866
		416	0.767483	0.90893	2.95295	0.402348	0.630552	1.67278	1.05571	0.0900468	-1.63687	0.947131	0.946705	0.717858	0.284409	0.829981
		417	1.20183	0.885	1.3415	0.300893	2.83988	1	1.00051	0.0991191	-1.97803	0.357343	-1.16553	0.776564	0.325203	0.891492
		418	1.10123	0.885481	2.88141	0.307462	1.89623	1.06655	1.0614	0.0982043	-1.9435	-0.0479885	-0.251684	0.787547	0.470782	0.874056
		419	0.962381	0.885	2.99848	1.68558	0.703217	1.56405	1.02478	0.0957621	-1.87038	0.368195	0.877924	0.830277	0.883596	0.737801
		420	0.979754	0.885116	2.9185	0.321039	1.17507	1.31136	1.08139	0.0973078	-1.92991	0.480096	0.401738	0.768534	0.387495	0.868607
		421	0.898337	0.88512	2.98073	0.530905	1.17853	1.45056	1.02311	0.0992125	-1.93025	0.747922	0.86614	0.795956	0.591783	0.80809
		422	0.960204	0.893819	2.92822	1.07561	0.578585	1.56676	1.08476	0.0997182	-1.8746	0.778472	0.846385	0.812064	0.848965	0.779671
		423	0.855721	0.901272	2.99534	0.57196	1.14215	1.86631	1	0.0828737	-1.81152	1.7095	0.950919	0.79084	0.588533	0.781549
		424	0.994597	0.891155	2.88898	0.980532	0.655977	1.52003	1.00562	0.0878678	-1.8614	0.393386	0.715166	0.81814	0.847794	0.795491
		425	0.920891	0.900887	3	0.819013	0.849652	1.54577	1.03289	0.0872091	-1.95016	0.610628	0.888945	0.812559	0.78282	0.785803
		426	0.938886	0.893006	2.95178	1.55134	0.674768	1.56309	1.08908	0.0819513	-1.94318	0.40852	0.905099	0.824341	0.879209	0.737223
		427	0.76921	0.949955	2.88259	0.422586	0.54346	1.64947	1.09501	0.1	0.0809244	0.428558	0.95796	0.689936	0.323398	0.826263
		428	0.800819	0.895228	2.99849	0.385311	0.556377	1.61011	1.22046	0.0919329	-1.80783	0.700793	0.913507	0.723584	0.300267	0.8459
		429	0.921841	0.932931	2.03999	0.313273	0.366011	1.04793	1.04228	0.0764224	-1.9364	0.119433	0.256489	0.626922	0.254949	0.894996
		430	0.909321	0.893954	2.94145	1.05272	0.639978	1.66058	1.06057	0.0976374	-1.98905	0.414986	0.909255	0.811814	0.824015	0.769392
		431	1.00823	0.885174	2.91004	0.318118	0.460854	1.0465	1.00054	0.0999847	-1.9864	0.400727	-0.0357938	0.713767	0.404519	0.894094
		432	1.0401	0.888391	2.97738	0.3	1.74552	1.23447	1.02826	0.1	-1.79318	0.400155	0.18073	0.781647	0.409719	0.868388
		433	0.932531	0.887821	2.61444	2.79018	1.21608	1.67432	1.0175	0.0965711	-1.92204	0.392163	0.918974	0.839348	0.889732	0.687535
		434	0.702683	0.971322	2.63631	0.30504	0.397177	1.65854	1.01428	0.096187	-1.45327	0.492529	0.941587	0.617822	-0.0137794	0.858759
		435	1.07479	0.901611	2.64556	0.3	0.628659	1.05323	1.05092	0.0997033	-1.99276	-0.00293376	-0.568004	0.718553	0.420823	0.90109
		436	0.848133	0.892511	2.98939	0.518384	0.610465	1.61473	1.07565	0.0888867	-1.89651	0.412764	0.894163	0.767463	0.533156	0.828877
		437	0.771768	0.977286	2.98289	0.3	0.395376	1.50034	1.09091	0.1	-1.8509	0.733529	0.889523	0.649387	0.116952	0.869206
		438	1.04284	0.887913	2.91408	0.368137	1.99465	1.36504	1.0692	0.0950458	-1.85602	0.417244	0.339403	0.794586	0.53178	0.847892
	2	439	0.961553	0.892328	3	3	0.451911	1.29403	1.17955	0.0613804	-1.45482	-0.236524	0.869946	0.841664	0.884377	0.696497
		440	0.773011	0.999663	2.99048	0.396914	0.644258	1.97671	1.03661	0.0914759	-1.08051	0.731709	0.95459	0.702893	0.328183	0.82517
		441	1.15596	0.893962	2.6242	0.300942	2.36011	1.07167	1.07054	0.0974956	-1.68334	0.645124	-0.405707	0.78415	0.483854	0.872589
		442	0.856638	0.908029	2.94788	0.312729	0.496191	1.35141	1.08437	0.0636798	-1.63275	0.399091	0.715031	0.693124	0.243677	0.874287
		443	0.89937	0.975126	2.78338	0.303091	0.441121	1.26533	1.00573	0.1	-1.94056	-0.18342	0.465978	0.671089	0.2976	0.889608
		444	0.917432	1.07399	0.663677	0.300047	0.660671	1.33334	1.0679	0.0946456	-1.38664	-0.291856	0.162639	0.560983	-0.0414012	0.897757
		445	0.85964	1.09038	2.87279	0.492857	0.374605	1.52269	6.66859	0.0972985	0.540003	1.44231	0.967555	0.547135	0.52686	0.48595
		446	0.747918	0.948576	2.99279	0.310525	0.3	1.63177	1.0694	0.0624911	-1.97862	0.449006	0.90768	0.628287	0.0993143	0.868918
		447	0.838096	1.35139	2.86073	0.3	0.361421	1.37586	1.02895	0.099696	-1.58608	0.244717	0.775361	0.616037	0.29922	0.88335
		448	1.06059	0.885	3	0.718968	0.600397	1.16932	1.07936	0.1	-1.98826	0.297388	0.297607	0.806169	0.817317	0.840172
		449	0.901249	0.898372	2.86441	1.25546	0.845831	1.61733	1.05757	0.0905658	-1.07009	0.539988	0.947581	0.816446	0.843389	0.734286
		450	1.02035	0.890979	2.99237	1.19558	0.5919	1.36037	1.0694	0.0615445	-1.97473	-0.537822	0.57712	0.825864	0.885308	0.777858
		451	0.847964	0.935283	2.98116	0.5354	0.45486	1.53481	1.0007	0.0976828	-1.38484	0.533274	0.908716	0.74488	0.565211	0.833967
		452	0.899851	0.890301	2.97968	0.520743	0.437085	1.39403	1.04681	0.0998217	-1.96697	0.498849	0.766889	0.753188	0.584909	0.849326
		453	0.915641	0.911993	2.93283	1.78149	0.657071	1.29829	1.07777	0.0976728	-1.1111	0.998008	0.951265	0.82464	0.884245	0.705076
		454	0.851124	0.998156	2.99632	0.505212	0.312758	1.54491	1.01711	0.0997265	-1.96971	0.429855	0.872057	0.703094	0.563607	0.850848
		455	0.776038	0.9214	2.96666	0.426235	0.30889	1.55653	1.06813	0.0943149	-1.02932	0.688572	0.940757	0.685504	0.334161	0.844881
		456	0.850361	0.998807	1.01156	0.301017	0.423361	1.21306	1.07961	0.0917985	-0.974944	0.154827	0.52123	0.532454	-0.029598	0.895585
		457	0.839795	0.896558	2.97561	0.681787	0.931949	1.82596	1.00765	0.0819378	-1.87773	1.23081	0.94942	0.798854	0.647187	0.775485
		458	0.850361	0.998807	1.01156	0.301017	0.423361	1.21306	1.07961	0.0917985	-1.92168	0.154827	0.473603	0.546667	-0.025713	0.899236
		459	1.01758	0.897057	2.98165	0.67505	0.728741	1.25253	1.0575	0.0596084	-1.98121	0.538071	0.541214	0.80663	0.785847	0.82889
		460	0.982796	0.890301	2.87451	1.1825	0.941323	1.39433	1.12148	0.0936391	-1.96164	0.50574	0.812282	0.82979	0.867068	0.762961
		461	0.928527	0.887324	2.95843	0.314196	1.26458	1.4592	1.00472	0.0899686	-1.97277	0.539882	0.620636	0.764653	0.324462	0.859675
		462	1.16362	0.887114	2.83462	0.921671	1.04736	1.09232	1.0188	0.086275	-1.96273	0.430907	-0.078105	0.817836	0.888508	0.82413
		463	0.849683	0.998807	1.01156	0.301649	0.423361	1.3613	1.07954	0.091562	-1.95255	0.162008	0.497766	0.555315	-0.0250703	0.895641
		464	1.06892	1.00128	2.79385	0.346761	1.39801	1.11547	1	0.098761	-1.98488	0.166389	0.0239908	0.766319	0.562795	0.87468
		465	0.895114	0.885988	2.99897	2.89458	0.392444	1.3282	1.0976	0.0982146	-1.38224	0.435869	0.950574	0.822113	0.873704	0.688152
		466	1.02292	0.908094	2.97785	0.303725	1.69854	1.33107	1.03123	0.0903509	-2	0.482417	0.284097	0.780193	0.415298	0.864745
		467	0.894933	0.92886	2.90778	0.890058	0.754638	1.56493	1.25	0.0916105	-1.9522	0.782349	0.932266	0.806196	0.790541	0.771139
		468	0.838096	1.04479	2.88621	0.3	0.300604	1.37958	1.02895	0.0751512	-1.55747	0.244717	0.725908	0.636109	0.243585	0.884315
		469	0.748733	0.996895	2.99037	0.395937	0.301441	1.63104	1.05682	0.0821912	-1.08051	0.731709	0.94851	0.657415	0.28374	0.845607
		470	0.894933	0.928639	2.97494	0.614153	0.762383	1.56476	1.25	0.0995857	-1.9781	0.782349	0.891289	0.7883	0.671843	0.810495
		471	0.747418	1.4025	0.97907	0.310525	0.3	1.63177	1.0694	0.0813258	-1.06163	0.446902	0.896591	0.49153	-0.0643493	0.879017
		472	0.781826	1.40501	0.985769	0.352686	0.360276	1.21635	1.06971	0.0981376	-1.22085	0.575275	0.836387	0.490714	0.0450337	0.879789
		473	0.961608	0.892351	2.98501	2.83832	0.655919	1.34738	1.04935	0.0978321	-1.39549	0.425697	0.909349	0.841205	0.885726	0.702818
		474	0.878219	0.890367	2.98694	0.663377	0.79363	1.63859	1.12327	0.0283991	-1.93071	0.626895	0.912303	0.797793	0.680406	0.787942
		475	0.801801	0.891993	2.99333	0.515764	0.367698	1.70939	1.08443	0.0639995	-1.76183	0.474447	0.935857	0.737637	0.476618	0.832425
		476	0.981501	0.8863	2.95111	0.367175	0.568138	1.31634	1.00038	0.0778548	-1.97109	-0.0472181	0.252843	0.747605	0.476988	0.879851
		477	0.831344	0.88969	2.97933	0.675879	0.527022	1.68871	1.00581	0.097524	-1.74631	1.24119	0.953251	0.774389	0.627423	0.795593
		478	0.7662	0.885494	2.95612	0.354127	0.332844	1.53709	1.1146	0.0818477	-1.22996	0.393194	0.916316	0.672475	0.180612	0.860068
		479	0.932306	0.89179	2.96262	0.683434	1.04738	1.51211	1.03156	0.0840953	-1.96217	0.430907	0.833789	0.811637	0.729398	0.797825
		480	0.850254	0.978221	2.77402	0.306178	0.463446	1.46576	1.01547	0.0999948	-1.94058	0.432553	0.719887	0.671736	0.239767	0.880115
		481	0.936862	0.885	2.95781	0.347308	1.25574	1.50278	1	0.095269	-1.96017	0.538543	0.638374	0.774047	0.396978	0.854306
		482	0.819178	1.25663	1.01156	0.300965	0.366545	1.21306	1.07778	0.0536956	-1.99672	0.154827	0.646456	0.512034	0.0196849	0.89335
		483	0.940604	0.890775	2.97669	2.8096	0.622505	1.27194	1.05452	0.0934175	-1.39687	-0.522079	0.891134	0.844689	0.884296	0.673619
		484	0.861804	0.887195	2.98037	0.703661	0.518189	1.668	1.07813	0.097231	-1.74712	0.40786	0.920228	0.786574	0.677045	0.806223
		485	0.856477	0.904792	2.97555	1.00786	0.30015	1.55052	1.11338	0.0931031	-1.40964	0.405705	0.950165	0.789294	0.787605	0.778702
		486	0.9343	0.903385	2.95977	2.77708	0.553386	1.55516	1.07961	0.097212	-1.05446	0.403326	0.939322	0.836792	0.888834	0.700167
		487	0.850613	0.892122	2.9756	0.503167	0.30015	1.41086	1.07034	0.0931031	-1.41649	0.435869	0.85742	0.730287	0.513294	0.849489
		488	0.928527	0.893635	2.96168	1.31428	0.671538	1.46241	1.00505	0.0970878	-1.97364	0.303628	0.899208	0.821361	0.864169	0.746772
		489	0.851334	0.978044	2.88946	0.313073	0.452093	1.46284	1	0.0998274	-1.92287	-0.18304	0.681788	0.679388	0.268222	0.879115
		490	1.267	0.903251	2.98789	0.505234	1.40251	1.02788	1.05161	0.0999956	-2	-0.688384	-1.38805	0.794657	0.820718	0.877333
		491	0.781826	1.40933	0.985769	0.352686	0.360276	1.21649	1.06971	0.0980616	-1.36434	0.575275	0.833516	0.492591	0.0464492	0.880046
		492	0.936862	0.910103	2.95781	0.347308	1.25574	1.50278	1	0.095269	-1.96017	0.538543	0.64703	0.770781	0.412981	0.85431
		493	0.821917	0.913592	3	0.564905	0.3	1.56943	1.09219	0.0835451	-1.9044	0.61007	0.92517	0.720654	0.555277	0.83353
		494	0.818414	0.889983	2.90718	0.374336	0.359675	1.3641	1.05755	0.0636876	-1.97206	0.59236	0.833133	0.688652	0.299789	0.863493
		495	0.981779	0.911806	2.9365	1.39302	0.659398	1.47146	1.03102	0.0950201	-1.78455	0.696632	0.845955	0.824813	0.891749	0.758463
		496	0.894338	0.889924	2.97579	0.504075	0.727146	1.45768	1.06348	0.0941604	-1.96329	0.774133	0.831121	0.774453	0.563757	0.834367
		497	0.899327	0.886039	2.9993	0.317878	0.643008	1.31749	1.09119	0.0932042	-1.45864	0.172835	0.600615	0.717565	0.296176	0.875078
		498	1.02267	0.904587	2.97785	0.333742	1.8205	1.32979	1.05445	0.0926172	-2	0.416356	0.351113	0.788361	0.472384	0.855552
		499	0.793779	0.893448	2.99482	0.364049	0.529686	1.51835	1.09566	0.0614455	-1.94548	0.594312	0.897154	0.711491	0.258152	0.851256
		500	0.774751	0.901141	2.94514	0.306723	0.305985	1.48268	1.01178	0.0955239	-1.82525	0.466052	0.859214	0.644311	0.0968872	0.875962
		501	0.95479	0.892689	3	0.647264	0.926737	1.35184	1.04704	0.0931582	-2	0.633819	0.771205	0.80883	0.728443	0.81332
		502	0.849437	0.885052	2.96712	0.608283	0.337392	1.54745	1.07015	0.1	-1.67929	0.580634	0.906076	0.75387	0.599297	0.829908
		503	1.17467	0.998283	1.00096	0.300753	2.40858	1.02755	1.0802	0.097414	-1.97684	0.14936	-1.11076	0.748027	0.277135	0.899322
		504	0.899483	0.886717	2.97606	0.395956	0.731522	1.3745	1.13132	0.0875853	-1.91648	0.367747	0.711303	0.754655	0.438171	0.855775
		505	0.80252	0.897289	2.90829	0.325554	0.525413	1.50255	1.06605	0.0930432	-1.80715	0.163848	0.839739	0.695479	0.186652	0.864151
		506	0.896625	0.889924	2.97785	0.504075	0.622235	1.45941	1.06209	0.099837	-1.96238	0.497625	0.796597	0.769336	0.566742	0.841896
		507	0.89937	0.976925	2.95982	0.326185	0.418557	1.38158	1.00005	0.0999731	-1.93127	-0.18304	0.530257	0.687453	0.360503	0.884548
		508	0.779883	0.9214	2.96666	0.426235	0.357105	1.5649	1.06813	0.0943014	-1.64277	0.688572	0.933149	0.698135	0.344826	0.846697
		509	0.917312	0.8894	2.91413	0.921671	0.948589	1.45905	1.00771	0.0998201	-1.94943	1.12323	0.922048	0.816413	0.794702	0.76448
		510	0.7662	0.885494	2.95697	0.354691	0.342767	1.53709	1.06027	0.0818477	-1.46268	0.48105	0.914304	0.67543	0.18277	0.860648
		511	0.853511	0.902576	2.09756	0.304075	0.344975	1.32421	1.04463	0.0969379	-1.99733	-0.0983115	0.542556	0.624057	0.137281	0.891311
		512	0.780987	0.888632	2.90118	0.340257	0.47094	1.54559	1.04445	0.0960882	-1.95005	0.593779	0.893164	0.689884	0.176117	0.860964
		513	0.963539	0.897062	2.99894	0.436451	1.00022	1.38277	1.07792	0.0937984	-1.97653	0.550141	0.614726	0.786462	0.565043	0.849138
		514	0.896589	0.891344	2.96618	0.591035	0.906756	1.50487	1.13015	0.0924833	-1.96363	0.692939	0.874629	0.795456	0.64092	0.810311
		515	0.736909	1.0049	2.97173	0.301895	0.323215	1.70898	1.02273	0.0875121	-1.94102	0.528881	0.923315	0.622296	0.0780394	0.86918
		516	0.854252	0.886005	2.95576	0.675879	0.520373	1.69747	1.00646	0.0999702	-1.77471	0.586116	0.928054	0.781365	0.650689	0.809573
		517	0.82704	0.887058	3	0.31904	0.736596	1.52318	1.04023	0.1	-1.94719	0.775974	0.844308	0.721971	0.203432	0.859292
		518	0.84858	0.894805	2.95964	0.586478	0.641115	1.67332	1.00825	0.096734	-1.72563	0.582701	0.92405	0.776513	0.590214	0.815503
		519	1.07461	0.885155	3	0.497457	0.932934	1.21272	1.07943	0.0951066	-1.98238	0.183651	0.0993186	0.799703	0.706894	0.861012
		520	0.781584	0.895336	2.92569	0.54402	0.338481	1.5965	1.04241	0.0943212	-1.56778	0.688509	0.9494	0.727211	0.468	0.825482
		521	0.801282	0.906715	2.97009	0.475724	0.344572	1.54612	1.12505	0.0997408	-1.91904	0.458849	0.916939	0.713963	0.433229	0.843927
		522	0.851357	0.885973	2.99958	0.558568	0.517856	1.72115	1.06533	0.099675	-1.96904	0.371685	0.895002	0.769998	0.569279	0.827331
		523	0.847964	0.935283	2.97374	0.534675	0.332491	1.53481	1.00594	0.0975946	-1.38484	0.533274	0.897441	0.733518	0.562395	0.840991
		524	0.905745	0.890271	2.97072	0.410608	0.940352	1.48008	1.07868	0.0936391	-1.96697	0.443158	0.746139	0.771714	0.468479	0.846415
		525	0.852314	0.890263	2.99681	0.342056	0.531368	1.53606	1.04448	0.0950932	-1.94775	0.761777	0.789173	0.715812	0.286131	0.864666
		526	0.916681	0.909742	2.98628	0.485481	0.474793	1.28127	1.10766	0.0976844	-1.80983	0.260999	0.691519	0.753384	0.579399	0.85416
		527	0.850361	0.998807	1.04149	0.301017	0.668247	1.21193	1.07961	0.0994664	-1.95262	0.491966	0.572853	0.586701	-0.0171976	0.889508
		528	1.0815	0.904388	2.90701	0.322219	1.75858	1.28461	1.07255	0.0926708	-1.96796	0.0239356	-0.0650237	0.783591	0.49755	0.872555
		529	0.932951	0.885913	2.95941	2.91794	0.609467	1.48188	1.07593	0.0960715	-1.39065	1.00341	0.945659	0.830989	0.87973	0.696154
		530	0.852889	0.886853	2.69042	0.324722	0.301898	1.31433	1.00474	0.0993083	-1.93816	0.394689	0.652355	0.650067	0.224521	0.885101
		531	0.942281	0.888606	2.91041	0.516354	1.32734	1.55644	1.02987	0.0943152	-1.9975	0.579628	0.771751	0.802296	0.61738	0.819534
		532	0.75618	0.885	2.8151	0.3	0.3	1.49365	1.05711	0.0788619	-1.98443	0.584645	0.877965	0.621384	0.0328124	0.874012
		533	0.781426	0.974578	0.539832	0.301931	0.308151	1.27398	1.13427	0.0958119	-1.33003	-0.0990162	0.615314	0.476073	-0.319014	0.902035
		534	0.845882	0.88564	2.90639	0.718777	0.727184	1.71779	1.2441	0.0780229	-1.97091	0.593419	0.938677	0.797653	0.664751	0.784841
		535	0.84089	0.88574	2.96955	0.468899	0.522119	1.55046	1.04541	0.0947763	-1.96855	0.757428	0.88776	0.746781	0.46233	0.841434
		536	0.841353	0.885	3	0.540406	0.461808	1.70015	1.08049	0.1	-1.63901	0.581102	0.91513	0.759278	0.53845	0.829226
		537	0.902251	0.885	3	0.865952	0.781505	1.56062	1.16462	0.0837195	-1.90357	0.956854	0.927235	0.810158	0.774202	0.774839
		538	0.736909	0.903597	2.94247	0.340125	0.344245	1.70798	1.02273	0.0870642	-1.92916	0.540066	0.932371	0.655268	0.11666	0.860258
		539	0.939622	0.895667	2.99253	0.677655	1.33032	1.67905	1.07141	0.0991451	-1.91224	0.493439	0.846167	0.81322	0.735089	0.788903
		540	0.849101	0.893842	2.99655	0.348005	0.733838	1.67886	1.06876	0.0976371	-1.96393	0.588409	0.825128	0.737632	0.299306	0.855401
		541	1.01807	0.886305	2.99834	0.529761	0.79976	1.3589	1.06616	0.0920424	-1.98676	0.0580614	0.387732	0.797542	0.695254	0.850817
		542	0.748313	0.899133	0.604254	0.309491	0.309313	1.4839	1.06715	0.0969286	-1.95301	-0.118005	0.713238	0.488399	-0.363446	0.896519
		543	0.804559	0.885	1.13367	0.3	0.378791	1.31077	1.06671	0.1	-1.45529	0.0623259	0.640134	0.552668	-0.123071	0.893143
		544	0.962068	0.885	2.93824	1.7009	0.5318	1.26416	1.2083	0.1	-1.74119	-0.17172	0.826819	0.831639	0.884063	0.733767
		545	0.980795	0.896965	2.99256	1.37421	0.584699	1.45508	1.02891	0.0888448	-1.80316	-0.521823	0.746374	0.831673	0.886775	0.753742
		546	0.852772	0.894968	2.91765	0.521896	0.496308	1.55128	1.0131	0.0971832	-1.9501	0.474847	0.87569	0.754492	0.535429	0.838283
		547	1.07485	0.887291	2.99826	0.924698	0.949008	1.2459	1.05178	0.0940501	-1.98128	0.429474	0.44802	0.822691	0.87083	0.806737
		548	0.780111	0.890778	2.9724	0.35729	0.468494	1.67545	1.11018	0.0798638	-1.79545	0.557837	0.913936	0.701672	0.217321	0.854599
		549	1.13669	0.885249	2.72553	0.302194	2.3407	1.05603	1.01192	0.0937365	-1.98132	0.666592	-0.291326	0.78932	0.475514	0.868458
		550	0.895142	0.887199	2.98733	0.909448	0.704295	1.45905	1.30211	0.0956156	-1.71129	1.16192	0.940735	0.806727	0.778901	0.766478
		551	0.972676	0.890938	2.92721	0.895053	0.933191	1.47393	1.07405	0.0663368	-1.95193	0.438422	0.792107	0.82276	0.824835	0.785182
[truncated: 17,008 more rows]

## Sheet: Brahmaputra
Table S13. Parameters and objectives of Pareto solutions in all experiments in the Brahmaputra River Basin
Experiment	Replication ID	SL. No.	WGHM Parameters																Calibration Objectives
			P-PM	EP-PTh	SN-FT	SN-MT	SN-DM	SN-TG	SL-MSM	SL-RC	GW-RFM	GW-MM	GW-DC	SW-RRM	SW-LD	SW-WD	SW-DC	NA-GM	NSE_Q	NSE_TWSA	NSE_ET	NSE_SWSA
Q	1	1	1.17934	1.19674	2.91373	3.43962	0.516283	0.00994518	1.45501	0.632012	0.936196	2.68178	0.00300037	2.24986	17.974	18.565	0.0623794	0.63814	0.952936	0.629257	0.552676	0.804363
	2	2	1.25754	1.57346	2.86353	3.43998	0.668269	0.00984473	2.30463	0.658549	0.824544	2.9332	0.00257772	2.15967	18.3337	19.1447	0.0600908	1.82931	0.954566	0.763556	0.926263	0.793031
	3	3	1.27494	1.62574	1.82306	3.36239	0.93502	0.00999606	2.92827	0.627691	1.13235	2.98867	0.00485334	2.3022	17.0599	8.34193	0.0341843	-0.333382	0.95403	0.753066	0.93384	0.878084
	4	4	1.28374	1.64871	2.73622	3.10563	0.741133	0.01	2.60659	0.743042	1.25423	2.78076	0.00123561	2.46711	13.6904	12.7758	0.0827758	0.825931	0.953983	0.716368	0.913353	0.88681
	5	5	1.1641	1.03942	2.63585	3.00576	0.880522	0.00996501	2.39227	0.63432	2.1895	1.79997	0.00716801	2.58843	18.7141	11.342	0.0341199	0.451709	0.950747	0.731185	0.381475	0.85231
	6	6	1.22814	1.36344	2.17945	3.07098	0.505231	0.00993079	2.84773	0.659657	1.3821	2.95846	0.00502237	1.8075	19.8722	9.12687	0.0871148	1.30631	0.953713	0.743926	0.843431	0.917586
	7	7	1.22859	1.36394	2.07846	3.39204	1.05377	0.00999996	2.09774	0.700029	1.23823	2.52969	0.00306922	2.64142	18.9158	10.1267	0.0430635	0.615222	0.952625	0.737267	0.853938	0.867816
	8	8	1.25494	1.49533	1.79691	3.38093	0.731065	0.00986913	2.94646	0.652291	1.5935	3	0.00695555	1.74605	15.275	7.08966	0.0451536	-1.75171	0.95308	0.813989	0.926449	0.884232
T	1	1	1.25662	0.890934	2.44813	2.65855	0.93695	0.00999389	2.92199	0.3	1.11355	0.30004	0.00112921	3.97643	5.77486	20	0.0943148	2	0.812161	0.971275	-0.0672702	0.348758
	2	2	1.23621	1.43965	2.44815	3.38389	1.83342	0.00899927	2.88503	0.349992	1.78971	0.497125	0.00100362	4.83858	11.5023	1.27935	0.0741821	1.998	0.909248	0.972353	0.927565	0.731786
	3	3	1.99961	0.885011	0.194534	-2.55665	1.39776	0.00100035	0.819811	1.73984	2.99991	1.43534	0.001	3.67685	17.3974	9.22935	0.0010002	0.36684	-1.77209	0.963539	0.878374	0.643188
	4	4	1.17081	1.43586	2.95064	3.35003	1.00795	0.00999826	2.95808	0.301324	1.68327	0.307007	0.00100086	4.10249	1.72308	15.7798	0.0999283	1.99996	0.92998	0.973374	0.785721	0.610596
	5	5	1.75265	0.974114	1.91438	3.05052	0.808524	0.00684568	1.05485	0.3	2.67086	1.15791	0.0010018	3.0144	2.42717	5.1587	0.0159428	1.25117	-0.682359	0.965837	0.612174	0.797328
	6	6	1.4705	1.35606	2.67026	2.96432	1.02181	0.00726401	1.54163	0.300049	2.51567	1.04874	0.0010027	3.95789	1.0905	2.35306	0.0687987	1.66015	0.600737	0.967903	0.898358	0.800409
	7	7	1.61174	1.22338	2.99873	3.19906	0.847632	0.00578872	2.36313	0.300138	2.63478	0.844468	0.001	2.55438	1.4928	8.19498	0.0953165	-1.99804	0.16873	0.965556	0.931541	0.822697
	8	8	1.27339	1.30197	2.44851	3.46745	1.92198	0.00892024	2.85222	0.308281	0.434187	2.62335	0.0122449	1.65289	15.3014	18.2965	0.0967624	-1.96368	0.883922	0.964705	0.805543	0.852234
E	1	1	0.59369	1.64998	2.90435	3.73055	0.500034	0.01	3	1.82845	0.720961	0.382155	0.0197531	4.75798	11.5143	1.00808	0.00116386	-0.47312	-0.559756	0.775318	0.957741	0.746579
	2	2	0.649902	1.09035	-0.990492	3.7442	0.618706	0.0043977	2.99798	2.92028	1.11128	1.56895	0.0140948	3.30837	13.0785	4.935	0.00767897	0.338572	-0.33303	0.761437	0.957823	0.585789
	3	3	0.860888	1.44804	1.55285	3.69194	0.570918	0.00834244	2.97697	0.854901	0.754922	0.751268	0.0122566	3.82159	13.1632	6.34315	0.0247688	-0.688802	0.444307	0.877322	0.961588	0.846654
	4	4	0.582809	1.32209	2.98802	3.74602	0.762172	0.00631337	2.99868	2.57431	0.492861	2.90023	0.0120987	2.32084	8.91575	5.33519	0.00202064	-0.160539	-0.596179	0.716866	0.959105	0.533707
	5	5	1.11942	1.4034	2.50135	3.71277	0.955566	0.00741089	2.99305	0.523303	0.329808	2.36662	0.00516949	3.0599	13.5475	3.66854	0.023553	1.16236	0.903517	0.920538	0.962475	0.913076
	6	6	1.75286	1.61447	-0.866064	3.74996	0.5	0.00999887	2.99944	0.300003	3	2.00977	0.0198062	3.52752	10.7574	4.22214	0.0688088	1.39004	-0.221368	0.624528	0.962191	0.444884
	7	7	0.641571	1.34355	1.97829	3.74392	0.506087	0.00725354	2.99191	1.77697	0.363815	1.84583	0.0141533	1.47535	13.4352	10.0341	0.0024567	0.348822	-0.301239	0.719063	0.958778	0.518599
	8	8	0.985274	1.49662	0.969672	2.79806	0.848358	0.00967143	2.99889	0.687662	0.467403	2.98268	0.0188994	4.85387	8.05813	9.94856	0.0815101	-1.2459	0.704121	0.925938	0.960814	0.730439
S	1	1	1.66746	1.15308	0.664537	3.6664	1.46717	0.00950501	2.54369	1.88785	0.894487	2.47352	0.00875755	1.04694	20	4.73467	0.0987497	0.955223	-0.257658	0.826997	0.745369	0.946786
	2	2	1.61285	1.26979	2.13804	2.2737	1.41495	0.00952182	2.72945	1.59697	1.55472	1.80293	0.00316737	1.00086	13.8951	11.2195	0.09975	0.52552	0.194365	0.809103	0.883245	0.946971
	3	3	1.90697	1.29307	1.67902	3.12139	1.13694	0.00989801	2.66223	2.67094	2.4719	2.47394	0.00230705	1	1.09783	12.053	0.0641731	1.02239	-1.07779	0.698913	0.792414	0.945606
	4	4	1.25411	0.961108	1.92537	3.2258	1.50385	0.01	1.95347	2.98977	0.37947	2.99984	0.00745968	1.40674	19.9979	4.44376	0.0841723	0.101509	0.766565	0.676045	0.328006	0.945641
	5	5	1.69593	1.19351	1.75267	2.55575	1.05936	0.00995426	2.33151	1.65721	1.32081	2.28376	0.00590284	1	18.1443	6.97085	0.094863	1.45252	-0.287719	0.796555	0.74789	0.947046
	6	6	1.89785	1.58549	0.922788	2.72788	1.15009	0.00919033	1.68829	2.28989	1.86972	0.765644	0.00772488	1	15.7528	3.3872	0.0498282	1.42553	-1.32731	0.840546	0.75307	0.941571
	7	7	1.58866	1.36451	0.69063	3.04172	1.98884	0.00993568	2.35845	1.42625	0.917848	2.68976	0.0113293	1.37994	15.1884	2.76418	0.0858298	0.213137	0.229164	0.787692	0.908433	0.944803
	8	8	1.53823	1.17804	2.8054	1.62064	0.715316	0.00996442	2.33935	2.54535	1.79539	1.24662	0.00349503	1.00006	19.6741	10.4112	0.1	-0.0369023	0.238057	0.696512	0.747077	0.947137
QT	1	1	1.24522	1.62587	2.64622	3.21632	0.849003	0.00811334	1.70285	0.494875	0.798339	2.786	0.00102116	3.063	1.28663	10.1628	0.0999876	-1.98604	0.949265	0.933306	0.909051	0.876945
		2	1.22023	1.58333	1.60677	3.19923	0.844239	0.0081398	1.51954	0.342154	1.01353	1.77063	0.0010101	4.0043	1.98499	10.2952	0.0999125	-1.96512	0.944361	0.952756	0.871569	0.808254
		3	1.22051	1.4966	1.65024	3.4614	1.3028	0.00773693	1.51944	0.342438	2.22682	1.02156	0.00100148	4.39503	18.2871	10.0677	0.0998528	-1.96193	0.940226	0.961127	0.868392	0.797325
	2	4	1.13634	1.12724	2.93734	3.31139	0.721163	0.00939415	1.24406	0.334971	0.695213	3	0.00409088	2.89847	15.8426	9.35826	0.1	-2	0.949458	0.954116	0.349314	0.861517
		5	1.19205	1.64996	2.86894	3.45855	0.719817	0.00921643	1.56498	0.334611	0.411454	2.96079	0.001	3.29706	16.6678	12.5641	0.087841	-2	0.945558	0.961392	0.860459	0.718766
	3	6	1.25924	1.6489	2.67172	3.28666	0.620809	0.00779299	1.66385	0.500207	0.952953	2.39046	0.0010735	3.09188	15.8368	9.29841	0.0980194	-1.96561	0.949208	0.930196	0.891064	0.861162
		7	1.22593	1.64949	2.67358	3.25867	0.877779	0.00772812	1.25914	0.354373	0.950351	2.1766	0.00102812	3.84497	18.8025	6.96884	0.0999766	-1.98182	0.945371	0.951804	0.841851	0.824808
		8	1.22761	1.62177	2.05158	3.09632	1.01205	0.00761779	1.20683	0.325021	2.4614	1.16209	0.001	4.87735	18.3706	9.49944	0.0997659	-1.97781	0.940566	0.961288	0.796586	0.777087
	4	9	1.23541	1.58101	2.76372	3.35482	0.945389	0.00729994	1.46329	0.39145	1.25978	1.72534	0.00100577	3.80981	1.06251	11.5492	0.0987378	-1.99964	0.94489	0.953307	0.85855	0.829748
		10	1.23571	1.58138	2.88703	2.84492	1.07212	0.00890177	1.44859	0.401109	0.702881	2.7463	0.00100019	3.26634	17.9248	11.5966	0.0850739	-1.99949	0.94924	0.941066	0.899866	0.795536
		11	1.23842	1.5814	2.7599	3.35456	0.945701	0.00724736	1.76638	0.390817	2.2805	0.957561	0.00100087	3.80232	19.6589	11.561	0.0997493	-1.99976	0.940625	0.961716	0.863473	0.828248
	5	12	1.14414	1.10617	2.75236	3.5087	1.91384	0.00883444	1.14892	0.407731	0.564813	2.80607	0.00434756	3.46913	1.00008	12.1339	0.0972851	-1.99791	0.945795	0.962971	0.511218	0.792184
		13	1.13938	1.1059	2.75234	3.50878	1.91378	0.00883301	2.06857	0.407528	1.35907	0.417585	0.0010013	4.72414	1.49045	16.8235	0.0839865	1.94927	0.934882	0.970844	0.58599	0.547145
	6	14	1.12191	0.946949	2.05389	2.85622	1.51341	0.00928837	2.92971	0.300124	1.2304	2.81461	0.013063	2.95966	19.1094	1.15626	0.0990931	-1.99942	0.942259	0.956557	0.287146	0.936084
		15	1.56052	1.59546	2.03412	2.41447	0.787711	0.00561242	1.37683	0.331154	2.14617	1.70892	0.001	3.47167	19.1929	11.2852	0.001	-1.88698	0.541054	0.961397	0.621515	0.889775
		16	1.12246	0.952511	2.05316	2.8566	1.51343	0.00928838	2.86526	0.300124	1.23026	2.80432	0.0139704	1.99793	19.1091	8.85969	0.0990931	-1.99946	0.945725	0.952592	0.282121	0.921374
	7	17	1.17179	1.2991	2.70276	3.56114	1.99095	0.00884317	1.46934	0.336939	0.636479	2.88388	0.00633309	2.48836	18.7278	13.9067	0.0802169	-1.95001	0.94942	0.958941	0.738995	0.842446
		18	1.16938	1.31998	2.70268	3.55753	1.97957	0.00885375	1.45639	0.322738	0.567448	2.87425	0.00669692	2.50251	18.7181	13.9054	0.0896087	-1.95976	0.947599	0.963082	0.73905	0.841171
	8	19	1.21482	1.60183	2.08343	3.17426	1.4359	0.00921774	1.66591	0.429591	0.656231	2.67336	0.00455019	2.48863	18.8966	13.0437	0.0982454	-1.99749	0.94946	0.952216	0.917026	0.867198
		20	1.21511	1.62817	2.08345	3.17174	1.43432	0.0092482	1.6413	0.429501	0.334974	2.66804	0.001	3.28195	19.2225	15.0424	0.0733857	-1.79107	0.944357	0.961302	0.915082	0.683468
QE	1	1	1.24642	1.3302	2.46336	3.38763	0.564684	0.00666896	2.99718	0.497518	0.96407	2.92481	0.00887606	2.35828	19.8915	13.5371	0.0207484	-1.5223	0.951617	0.829433	0.960069	0.798733
	2	2	1.25262	1.11128	-0.984809	3.51519	0.818592	0.0061256	2.96529	1.02991	0.756628	2.80684	0.00681814	2.75938	19.528	12.8581	0.026147	-1.20895	0.948753	0.809434	0.953406	0.819673
	3	3	1.26295	1.51057	0.683047	3.12773	0.880543	0.00914684	2.99213	0.458944	1.05863	2.52994	0.00558026	2.55548	13.4433	9.33073	0.0441135	0.117515	0.951367	0.777612	0.961099	0.875974
	4	4	1.26644	1.48058	2.69412	3.34834	0.757866	0.00782343	2.99983	0.439455	1.5362	2.36246	0.00646061	2.48351	19.9387	10.6463	0.0393476	-0.0607074	0.951885	0.814034	0.962936	0.85079
	5	5	1.25126	1.28547	1.62394	3.71653	1.67181	0.00744813	2.95828	0.529188	1.06695	2.97072	0.00774687	2.10176	18.5196	9.49803	0.0415428	-0.955488	0.951385	0.857324	0.957655	0.875613
	6	6	1.23555	1.11829	-1	3.74996	1.39819	0.00648573	2.88313	0.941805	1.35322	2.89733	0.0116403	1.62421	19.9952	9.73801	0.0322715	-0.91533	0.948712	0.84456	0.953721	0.834741
	7	7	1.254	1.50134	1.58991	3.10869	1.3014	0.00907224	2.91875	0.457719	0.940047	2.94523	0.0099021	2.01649	14.6741	13.1338	0.0254053	-0.321031	0.952297	0.818452	0.961435	0.82485
	8	8	1.24963	1.28936	0.673649	3.74774	0.783587	0.00704802	2.91487	0.54868	1.30892	2.96541	0.00799316	1.86001	16.927	7.71001	0.0952011	-1.76339	0.951039	0.857088	0.958707	0.913856
QS	1	1	1.16899	1.05201	2.44101	1.51283	0.642783	0.00999076	2.84233	0.710974	1.05376	2.99959	0.00495162	2.37803	8.86124	5.06718	0.0999198	-0.404745	0.950415	0.838709	0.547234	0.937982
		2	1.16903	0.993837	2.44118	1.49405	0.840712	0.00999075	2.84416	0.711366	0.948772	2.99946	0.00454572	2.35895	8.86301	5.0866	0.0999523	-0.0375409	0.947838	0.822601	0.492287	0.940367
	2	3	1.20384	1.08474	2.38891	1.96231	1.50015	0.00999941	2.65964	0.575154	1.2412	2.83744	0.00329907	2.39307	1.49189	7.5833	0.0999997	0.364296	0.946574	0.686558	0.668102	0.940878
		4	1.20417	1.1855	1.79139	2.0113	1.00574	0.00999942	2.85314	0.671339	1.24181	2.84296	0.0047284	2.45359	1.4917	6.62167	0.0999984	-1.55775	0.951138	0.855451	0.787356	0.938132
	3	5	1.20744	1.0831	2.37215	2.22961	1.99334	0.00995567	2.80924	0.740851	1.16185	2.97118	0.00392443	2.35117	18.7242	5.64396	0.0999999	0.598785	0.948054	0.61285	0.690969	0.940874
		6	1.1813	1.08588	2.27144	2.56027	0.894518	0.00993486	2.81463	0.741285	1.16203	2.9874	0.00388637	2.32417	18.9009	5.48238	0.1	0.590751	0.951244	0.788261	0.566546	0.938208
	4	7	1.19786	1.25704	2.20719	3.41653	1.78337	0.00999085	2.87431	0.542142	1.07752	2.97523	0.0052449	2.1484	1.0126	7.67692	0.0979679	-0.905922	0.95124	0.783469	0.774327	0.938216
		8	1.19788	1.23973	2.71487	2.44589	1.7813	0.00983202	2.87433	0.489996	0.862778	2.97276	0.00524291	2.14766	1.00818	7.67146	0.0979654	-0.89827	0.947679	0.751878	0.820366	0.941278
	5	9	1.15655	0.99759	2.9071	3.20782	1.69281	0.00996314	2.1335	0.590962	1.45247	2.4778	0.00301502	2.4464	17.9698	5.4667	0.0999999	0.544112	0.947198	0.589099	0.307	0.94051
		10	1.1765	1.14261	2.90143	3.24509	1.54486	0.0099719	2.24068	0.592804	1.47348	2.50592	0.00300498	2.32498	15.879	6.6832	0.1	0.930205	0.949394	0.670912	0.586716	0.938433
	6	11	1.17654	1.17613	2.92988	2.99573	1.39919	0.00999404	1.92844	0.430951	1.0788	2.96671	0.00437008	2.27615	17.9739	5.12425	0.0999859	0.774608	0.949507	0.700756	0.602368	0.940236
	7	12	1.21658	1.27312	2.17641	2.24003	1.3974	0.00999927	2.57529	0.623782	1.29171	2.69362	0.0044768	2.43383	1.55067	7.30477	0.0999634	0.0172958	0.950785	0.730636	0.868568	0.93824
		13	1.17164	1.12594	2.15598	1.97402	1.02695	0.00997393	2.32169	0.338026	1.13755	2.69054	0.00449291	2.4358	1.01207	6.69225	0.0999559	0.0268142	0.947653	0.793143	0.571968	0.940463
	8	14	1.2435	1.44936	2.4156	3.36458	1.84286	0.00986813	2.99691	0.687894	1.22212	2.73226	0.00288103	2.15927	17.469	6.39089	0.0999821	-1.89078	0.950824	0.792809	0.923922	0.938291
		15	1.20014	1.23488	2.60056	3.31571	1.83649	0.00992604	2.99365	0.489679	1.05255	2.73226	0.00289811	2.14959	17.5754	6.45455	0.0999871	-1.88853	0.947609	0.792303	0.739132	0.94083
TE	1	1	1.34765	1.35038	2.1584	3.65952	0.672035	0.00688114	2.99118	0.405024	1.3959	0.99785	0.00101912	4.15425	6.07887	4.92166	0.00182559	-1.96367	0.834216	0.963098	0.960519	0.847307
	2	2	1.56108	1.37835	2.92842	3.4499	0.962349	0.00693263	2.97644	0.331621	1.30879	1.01283	0.00101732	3.15856	10.1808	1.0008	0.0993624	1.65333	0.352138	0.966191	0.961797	0.798858
	3	3	2	1.05605	-0.996941	3.15019	1.04743	0.00621427	2.91577	1.99088	2.86244	1.11415	0.00100004	2.56322	8.6778	12.3407	0.00100016	1.99995	-1.86992	0.961386	0.956005	0.832804
	4	4	1.26872	1.48485	2.28561	3.38605	1.20771	0.00838615	3	0.458771	1.73335	0.516055	0.001	4.14398	1.20529	3.75154	0.1	2	0.903535	0.968248	0.962229	0.793032
	5	5	1.75647	1.35602	2.38857	3.74799	0.54775	0.00624439	2.99064	0.300058	1.70189	1.07383	0.00101069	2.76753	14.2872	8.28264	0.00116111	0.292485	-0.424597	0.965164	0.962633	0.843375
	6	6	1.8071	1.00236	-0.99883	2.27925	0.652445	0.0054922	2.99989	1.91665	2.99993	1.14573	0.00101013	3.00251	19.0074	5.30942	0.001	-1.99988	-0.663039	0.961447	0.952161	0.845755
		7	1.30878	1.2659	1.50944	3.35882	0.55847	0.00660869	2.99854	0.497061	1.16699	1.13924	0.00101066	3.17363	3.93364	5.27248	0.00110935	-1.96408	0.865316	0.943461	0.956809	0.916337
	7	8	1.57557	1.08836	-0.42534	3.59208	1.09958	0.0064202	2.99786	1.14839	2.98677	0.884431	0.001	3.137	1.01796	3.50496	0.0996609	-1.90357	0.324963	0.960361	0.950024	0.854267
		9	0.943886	1.53292	0.959251	3.60055	1.10004	0.00952852	2.98944	0.844742	2.86482	0.881331	0.0167417	3.67594	1.05524	3.52697	0.0997063	-1.90422	0.646756	0.93209	0.957819	0.894479
	8	10	1.86232	1.26163	-0.38605	3.63625	0.934222	0.00723727	3	0.301911	1.65611	0.977596	0.00100823	2.72755	14.2554	2.32879	0.001	2	-0.970856	0.966522	0.95883	0.814364
TS	1	1	1.51559	1.64995	2.03562	3.25962	1.39596	0.00751497	1.99652	0.38013	2.16983	1.06357	0.00115797	1.29155	1.74577	15.5275	0.0999427	-1.95914	0.602146	0.957778	0.769941	0.941424
		2	1.51558	1.64993	2.03316	3.2596	1.39596	0.00751501	1.99476	0.380121	2.39585	1.06357	0.00115763	1.55189	1.74578	13.4564	0.0999427	-1.95914	0.611675	0.960352	0.765167	0.937986
	2	3	1.84088	1.11114	1.76186	2.86441	0.67612	0.00703286	2.9917	1.5507	1.87273	1.2674	0.0016494	1.21514	8.85328	6.38445	0.035857	-1.99962	-0.958693	0.946195	0.917292	0.940319
		4	1.8362	1.112	1.51139	3.05416	0.515401	0.00593258	2.99095	1.50908	1.87272	1.26817	0.0010007	1.65806	2.88111	6.38433	0.0158178	-1.99785	-0.867582	0.950558	0.943146	0.935509
		5	1.73798	1.11073	1.52039	3.07798	0.50597	0.00593418	2.99172	1.51061	1.87298	1.26698	0.00100097	1.69799	2.88585	6.38433	0.0806706	-1.99334	-0.360521	0.955639	0.94183	0.918267
	3	6	1.66141	1.6487	2.24865	3.73846	1.17983	0.00698285	1.46198	0.456142	2.61418	1.07311	0.00103198	1.30447	2.7106	11.9488	0.0908527	1.99993	0.166117	0.960303	0.719409	0.936894
		7	1.66256	1.64985	2.25051	3.74	1.17567	0.00697936	1.46019	0.461834	2.61188	1.071	0.00104874	1.08736	4.55357	12.525	0.0862692	2	0.161573	0.957137	0.71573	0.941346
	4	8	1.08849	1.65	2.99991	2.99753	1.0894	0.00999998	3	0.764197	2.9951	0.350376	0.00708656	4.52214	6.84695	4.08705	0.00102763	1.99808	0.860923	0.965137	0.921886	0.898563
		9	1.70963	1.64865	2.99598	3.73841	0.529515	0.00687258	2.1118	0.402226	0.935043	1.90138	0.00228918	1.07882	19.6319	4.67754	0.0762354	-1.64307	-0.0791737	0.951737	0.894036	0.941832
		10	1.08804	1.65	2.99992	3.00081	1.0894	0.00999998	3	0.764296	2.99345	0.350207	0.0106874	3.82528	6.80588	8.1031	0.00103507	1.99809	0.862796	0.960217	0.921867	0.923574
		11	1.08848	1.65	2.99992	3.00791	1.08994	0.00999998	3	0.760828	2.99395	0.350545	0.00775146	3.63437	7.46967	7.86536	0.00102932	1.99808	0.863284	0.955718	0.922365	0.931039
	5	12	1.79713	1.64854	2.00207	3.65704	0.500202	0.00597921	1.62991	0.378376	2.18054	1.22478	0.001	1.31909	10.4002	5.56175	0.0643882	1.34937	-0.373862	0.960739	0.717598	0.936775
		13	1.79641	1.65	2.01055	3.66623	0.500072	0.0060132	1.62912	0.372056	1.88335	1.24973	0.00100012	1.00705	3.93378	9.78146	0.067084	1.34893	-0.388596	0.958134	0.732496	0.941086
	6	14	1.95524	1.6493	1.66851	3.74966	0.500019	0.00677918	2.0874	0.970068	2.04935	1.01614	0.001	1.00046	3.64347	6.8758	0.049831	0.869533	-1.22151	0.952818	0.585047	0.940254
		15	1.99988	1.6493	1.4043	3.7437	0.520445	0.00100004	2.07069	0.300035	1.65379	1.23617	0.001	1.03583	8.17555	6.90313	0.0499242	-0.548002	-1.14743	0.962756	-0.104449	0.936038
		16	1.99989	1.64998	1.41706	3.7437	0.520652	0.001	2.07605	0.300433	2.03659	1.21866	0.001	1.04017	8.19266	6.90292	0.0847261	-0.408478	-1.13544	0.965279	-0.126647	0.930369
	7	17	1.70767	1.6361	2.18639	3.45582	0.91621	0.00709701	2.23612	0.416072	1.93814	0.884035	0.00102857	1.00164	14.8811	9.11734	0.0895476	1.99999	-0.0443462	0.960404	0.782333	0.940462
	8	18	1.33432	1.62411	1.2548	3.04304	1.85214	0.00962448	2.9812	0.438935	0.47229	2.99999	0.0102985	1.43833	15.393	6.23873	0.0999995	-1.98683	0.865379	0.957139	0.944072	0.943341
ES	1	1	1.58897	1.24903	0.250072	2.933	0.717725	0.00786131	2.13167	0.695322	1.81038	1.71002	0.0021565	1.50865	18.9749	6.71579	0.0832597	1.99976	0.369642	0.914639	0.950607	0.94026
	2	2	1.81837	1.21868	0.733844	3.26912	1.286	0.0081484	2.50718	2.97751	1.13584	2.83707	0.00660761	1.07522	19.7434	4.67007	0.0814353	1.68701	-0.661346	0.881824	0.937292	0.944911
		3	1.85253	1.06427	-0.95787	3.44511	1.02717	0.00622844	2.99897	3	0.763178	2.82491	0.00660602	1.01049	19.6679	4.67037	0.0755478	1.70462	-0.87765	0.888942	0.956202	0.942458
	3	4	1.878	1.48723	0.875606	2.44469	1.04142	0.00930833	2.85453	0.300039	1.50492	1.88721	0.00128201	1.47048	1.36095	9.53672	0.00994474	-0.979431	-0.814901	0.866769	0.957299	0.940276
	4	5	1.66873	1.51827	0.508014	3.71591	1.78309	0.00891745	2.99999	0.305129	1.30182	2.86099	0.00359681	1.304	8.71591	7.28934	0.083226	-1.14123	0.224921	0.809471	0.963172	0.943009
		6	1.8565	1.41825	0.543078	2.51927	1.67534	0.01	2.17208	0.56733	1.28606	2.9331	0.00547983	1.0005	8.98783	7.26705	0.0821438	-1.12335	-0.664875	0.737441	0.934688	0.945025
	5	7	1.88053	1.27601	0.278909	3.63291	0.921116	0.00721992	3	0.367668	0.809824	3	0.00518064	1.00401	6.56504	5.84982	0.0548457	-1.68825	-0.82858	0.892771	0.956898	0.94143
	6	8	1.73366	1.49803	-0.318836	2.83239	1.44372	0.00999089	2.9962	0.3	1.9124	2.93388	0.0117546	1.73933	14.3359	1	0.0798866	1.29153	-0.126467	0.789116	0.960483	0.940565
	7	9	1.84303	1.06466	-0.591134	3.45281	0.800792	0.00583154	2.95331	2.40231	1.15303	2.82484	0.0136063	1.13071	19.4115	3.01962	0.0950942	-0.468094	-0.932226	0.863728	0.955675	0.942022
	8	10	1.5734	1.36376	-0.208271	3.32795	0.749134	0.00803173	2.99802	0.362172	0.666338	2.96225	0.00577735	1.1995	18.9135	6.33416	0.097026	-0.191841	0.433054	0.891243	0.960847	0.941325
QTE	1	1	1.22639	1.47126	2.88279	3.66974	0.882458	0.00770661	2.88414	0.50381	1.14129	2.63743	0.00944124	1.80073	17.4294	9.62779	0.0995389	-1.95313	0.949778	0.920958	0.961188	0.91433
		2	1.18976	1.51432	2.57877	2.89939	0.999867	0.00985309	2.6274	0.456111	1.47552	0.30751	0.00100371	3.6253	10.3513	18.8579	0.039783	1.9445	0.938921	0.960059	0.931371	0.60795
		3	1.20723	1.52586	2.96911	1.84496	0.983109	0.00961817	3	0.457579	1.55124	0.3	0.001	3.54931	13.6224	19.2846	0.0930194	2	0.934134	0.9656	0.954648	0.691522
		4	1.2073	1.46965	2.98292	3.67984	0.990835	0.00770822	2.98891	0.448358	1.31881	0.809066	0.00126114	3.56219	19.1427	9.42786	0.091977	-1.95276	0.939863	0.955694	0.961785	0.80608
		5	1.20715	1.62898	2.66647	2.57732	0.988522	0.0098454	2.97093	0.456951	1.55899	0.300008	0.00111424	4.30575	13.6219	6.69345	0.0472789	1.94452	0.9303	0.966239	0.955777	0.690444
		6	1.22638	1.47024	2.96334	3.6744	0.985023	0.00770678	2.91461	0.501601	1.32484	0.804769	0.00128277	3.6404	17.4564	14.6791	0.0689626	-1.9494	0.944084	0.942042	0.961277	0.712468
		7	1.20593	1.52969	2.55796	2.69772	0.886567	0.00983298	2.95631	0.39599	2.91422	0.307226	0.00100314	4.30054	10.0372	7.00504	0.0918593	1.94378	0.926064	0.970498	0.933866	0.690409
		8	1.21166	1.52586	2.38709	1.84496	0.97929	0.00984045	3	0.457579	1.5581	0.3	0.00110694	3.67843	10.3428	19.2846	0.0930194	1.99997	0.934217	0.964119	0.955864	0.667886
		9	1.22639	1.4703	2.97984	3.67841	0.985995	0.00771603	1.9708	0.503685	1.31822	2.73214	0.00945076	1.80073	17.3603	9.60044	0.0995181	-1.95308	0.949476	0.927367	0.945203	0.912158
	2	10	1.21944	1.57652	2.86024	3.72652	1.93601	0.008727	2.99792	0.414609	0.501477	2.904	0.00836598	2.10966	11.152	9.47974	0.0962862	-1.99536	0.942268	0.961011	0.960732	0.909048
		11	1.21955	1.58351	2.86025	3.72649	1.94478	0.00872595	2.9971	0.414287	0.501477	2.90389	0.00835586	2.10996	10.7718	13.0247	0.096286	-1.99536	0.945021	0.957976	0.960646	0.883339
		12	1.21949	1.57599	2.86045	3.72602	1.94416	0.00872691	2.15578	0.414576	0.492437	2.90046	0.00826003	2.1099	17.1092	14.7141	0.0962435	-1.98707	0.944455	0.962372	0.942326	0.859444
		13	1.21949	1.57651	2.86801	3.72633	1.94416	0.00872661	1.73493	0.414709	0.701197	2.90307	0.00663225	2.0958	10.8722	14.7186	0.0962661	-1.99758	0.949404	0.955373	0.923481	0.881256
		14	1.21949	1.57601	2.86751	3.72632	1.94416	0.00872661	2.13193	0.414573	0.701197	2.90306	0.00663217	2.09648	4.29677	14.7186	0.0962672	-1.9879	0.949606	0.952183	0.941571	0.892652
		15	1.21949	1.57599	2.86034	3.72528	1.97546	0.00875633	2.99683	0.414058	0.788976	2.97723	0.00827962	2.09405	6.15832	9.4826	0.0958328	-1.98671	0.949237	0.945555	0.960641	0.919355
	3	16	1.22629	1.65	2.31769	2.32239	0.70332	0.00995344	2.9608	0.415461	0.499149	3	0.00668358	2.50297	14.1848	10.9516	0.0539287	-1.89274	0.949171	0.937717	0.956257	0.836143
		17	1.2155	1.53374	2.63877	3.39689	1.55116	0.00879685	2.99941	0.453415	1.17293	0.773155	0.00128661	3.44322	12.933	13.3617	0.0998812	-1.99947	0.940084	0.957757	0.961169	0.777723
		18	1.24312	1.52691	2.63883	3.39694	1.47769	0.00879834	2.99766	0.451002	1.10093	2.97572	0.00651632	2.4638	3.97533	2.5795	0.0772672	-1.99851	0.949252	0.925149	0.960879	0.935448
		19	1.22402	1.53271	2.63865	3.39705	1.55	0.00878766	2.99894	0.453425	1.17269	1.06316	0.00129783	3.44362	13.8736	13.3768	0.0996348	-1.99857	0.944161	0.94683	0.961189	0.791499
		20	1.22625	1.65	2.3661	2.32239	0.702699	0.00991447	2.59177	0.415523	0.499027	3	0.00668458	2.49944	13.6702	10.9516	0.0498704	-1.89274	0.949182	0.941335	0.950263	0.832322
		21	1.22626	1.65	2.37138	2.32239	0.712009	0.00991511	2.63597	0.415832	0.495737	3	0.00668458	2.51658	13.6702	10.9516	0.0896585	-1.89496	0.946808	0.950141	0.950749	0.853708
		22	1.21622	1.53277	2.63876	3.39688	1.55001	0.00879625	2.99942	0.453416	1.17536	0.659492	0.00128661	3.46248	3.29075	13.3714	0.098812	-1.99874	0.936386	0.961681	0.961146	0.78465
	4	23	1.27075	1.46028	2.9613	3.75	1.25148	0.00747287	2.98813	0.43915	2.06972	0.732552	0.00100068	4.72608	3.34773	1	0.0575753	-1.98522	0.91409	0.965276	0.958816	0.819089
		24	1.22151	1.44717	2.97578	3.74527	1.15535	0.00759186	2.99659	0.433223	2.15363	0.649611	0.00100328	4.12683	9.19638	11.5437	0.0994263	-1.99358	0.939116	0.955198	0.961387	0.750484
		25	1.22582	1.44635	2.72007	3.74988	1.1958	0.0076306	2.99549	0.427013	1.19022	2.3892	0.00823203	2.81259	7.24595	1.24961	0.0776039	-1.62762	0.944375	0.936822	0.962186	0.935288
		26	1.22214	1.44698	2.99049	3.74942	1.15722	0.00747562	2.99126	0.430585	2.15547	0.717708	0.00103193	4.63148	7.50814	3.80622	0.0995062	-1.99367	0.934997	0.961583	0.961367	0.80536
		27	1.27084	1.44728	2.95145	3.75	1.24931	0.00747287	2.98813	0.429826	2.06972	0.733834	0.00103169	4.72608	3.34773	1.00072	0.0577086	-1.98522	0.912681	0.965459	0.961043	0.817833
		28	1.22925	1.50612	2.76334	3.75	0.637415	0.00764277	2.96493	0.474708	1.364	2.34565	0.00819367	1.78666	6.86699	8.45197	0.098526	-1.99313	0.949445	0.921278	0.961702	0.920302
	5	29	1.19068	1.48298	2.95322	3.74898	0.97408	0.00850729	2.65306	0.320727	0.694518	2.9477	0.0110283	2.05641	3.52949	12.3227	0.0937023	-1.98011	0.945622	0.95504	0.872447	0.892712
		30	1.22536	1.5082	2.53536	3.74607	1.73498	0.00847554	2.92962	0.47407	0.697663	2.87609	0.00790029	2.07375	13.4142	10.7393	0.0786751	-1.99146	0.949564	0.936628	0.961637	0.898216
		31	1.22498	1.48612	2.34771	3.75	1.71888	0.00849892	2.61696	0.456769	0.693509	2.94308	0.00795045	2.06516	13.3528	10.8468	0.0786751	-1.99146	0.949457	0.940749	0.956933	0.897136
		32	1.21279	1.48124	2.33869	3.74901	1.75439	0.00851075	2.9917	0.456253	0.694476	2.94764	0.0110259	2.05657	10.3207	6.59899	0.0765222	-1.99404	0.944196	0.952913	0.961178	0.923215
		33	1.21431	1.50795	2.54552	3.74595	1.73412	0.0084902	2.94791	0.480238	1.38741	0.435021	0.001	3.48929	17.4583	14.9298	0.0976028	1.95928	0.934454	0.965255	0.96156	0.724304
		34	1.20352	1.48127	2.34573	3.74944	1.75617	0.0085098	2.67654	0.318687	0.703344	2.93218	0.00788785	2.06541	14.2186	12.5806	0.0785158	-1.9921	0.949515	0.945223	0.914212	0.88906
		35	1.21215	1.48321	2.3596	3.75	1.75503	0.00849706	2.98467	0.460111	0.616916	2.93201	0.0110011	2.05607	11.1088	6.80954	0.0997716	-1.99741	0.941365	0.957182	0.961297	0.928366
	6	36	1.22145	1.49325	2.91827	3.45972	1.85873	0.008673	2.9583	0.460549	1.03214	2.80597	0.00860951	1.79089	7.57042	8.25484	0.086614	-1.97746	0.949349	0.935513	0.960205	0.927994
		37	1.21215	1.49418	2.99678	3.45997	1.86981	0.008673	2.95927	0.461828	1.03214	2.81173	0.0118153	1.798	7.84314	2.87523	0.0865691	-1.97902	0.939889	0.957176	0.960126	0.926784
		38	1.21214	1.49663	2.97135	3.45289	1.86631	0.00863248	2.95528	0.464244	1.11425	2.98835	0.0118554	1.90947	15.4162	3.07363	0.0864293	-1.97158	0.944197	0.952116	0.960524	0.929927
		39	1.20187	1.49346	2.99447	3.44703	1.50645	0.00866476	2.77127	0.346512	0.927401	2.99955	0.0114831	1.68891	15.9483	12.4951	0.0809825	-1.95064	0.949241	0.946678	0.925711	0.898987
		40	1.21193	1.49572	2.99617	3.45798	1.86185	0.00862168	2.94541	0.470919	1.25686	0.562799	0.00229241	3.91507	12.2606	9.21849	0.0862962	-1.97902	0.934815	0.961047	0.960216	0.735608
		41	1.19425	1.52447	2.99853	3.45418	1.84569	0.00866411	2.7714	0.346417	0.804893	2.9992	0.0148514	1.54952	15.9978	14.4304	0.0861541	-1.91543	0.94467	0.956517	0.937972	0.894942
		42	1.21223	1.57735	2.9986	3.44851	1.84569	0.00866401	2.77054	0.335967	1.03271	2.98988	0.0112915	1.5227	19.8284	14.4038	0.0864439	-1.95186	0.949587	0.941493	0.944042	0.897369
	7	43	1.19981	1.63883	2.95549	2.88325	0.543968	0.00926112	2.56358	0.366223	0.427687	2.74936	0.0043569	3.31952	10.3757	5.76549	0.0476647	-1.92868	0.944166	0.955804	0.932248	0.824697
		44	1.23488	1.62745	2.43383	3.03773	0.556122	0.00874194	2.99945	0.416065	0.845694	2.6351	0.00578888	2.95841	10.0811	3.31589	0.0523029	-1.94072	0.949222	0.923362	0.960069	0.909338
		45	1.19813	1.64908	2.9997	3.13335	0.535013	0.00859401	2.98781	0.416396	0.348106	1.70605	0.00106683	3.36102	10.8005	9.41437	0.0979032	-1.72799	0.938961	0.956107	0.95758	0.76321
		46	1.21619	1.63317	2.98971	3.02149	0.625479	0.00876385	2.98069	0.427381	0.568462	2.75275	0.00654398	2.76166	15.8783	3.24733	0.0408576	-1.9766	0.944941	0.947829	0.957372	0.907217
		47	1.22787	1.52488	2.37117	2.48378	0.531897	0.00848209	2.97961	0.427516	0.571275	2.74994	0.00558261	2.91203	11.0065	3.25527	0.0548546	-1.92631	0.94462	0.937111	0.960956	0.911102
		48	1.20096	1.64897	2.98964	3.03562	1.22789	0.00908913	2.92521	0.426704	0.397259	2.6102	0.00566387	3.34896	1.02869	4.10762	0.0548148	-1.99787	0.936848	0.960295	0.955408	0.879087
		49	1.21986	1.65	2.96387	3.35465	0.967228	0.00878264	2.41172	0.364631	0.932232	2.74332	0.00693557	2.6977	14.5918	3.66694	0.0474309	-2	0.949942	0.940484	0.94294	0.913758
		50	1.21619	1.63317	2.9525	2.97858	0.540075	0.00924395	2.98114	0.43094	0.568333	2.77272	0.00654398	2.94401	10.3651	3.32649	0.0404638	-1.97598	0.944243	0.951447	0.952436	0.898346
		51	1.20187	1.639	2.98782	2.85841	0.548521	0.00925772	2.55269	0.360262	0.427042	2.75044	0.00434708	3.63042	10.424	2.53572	0.0476661	-1.97287	0.939351	0.96074	0.931685	0.843838
		52	1.20002	1.58208	2.06182	3.09066	1.25876	0.00917357	3	0.431917	0.396092	2.69752	0.00625827	3.39217	8.63242	4.19551	0.0754437	-1.95948	0.938936	0.952449	0.960055	0.856622
		53	1.21586	1.65	2.96387	3.35465	0.974452	0.00878264	2.98115	0.364048	0.932232	2.74332	0.00693557	2.6977	13.1373	3.26502	0.0474309	-2	0.949483	0.935666	0.955564	0.91989
	8	54	1.2097	1.57507	1.34338	2.45649	1.27643	0.00999816	2.96666	0.398406	2.44422	0.324226	0.0010134	4.19997	7.28563	13.166	0.0809199	1.99879	0.934303	0.9654	0.955248	0.66965
		55	1.21013	1.53866	1.60366	3.41667	1.9993	0.00937377	2.99973	0.472805	0.356196	2.45856	0.00698453	2.73565	5.94114	11.1148	0.0989744	-1.97859	0.940237	0.957227	0.960217	0.847256
		56	1.15824	1.64041	2.06162	3.11856	1.64935	0.00998001	2.99043	0.301207	2.12918	0.3	0.001	4.67946	4.9142	11.6775	0.0914613	1.9939	0.92965	0.970454	0.912873	0.632104
		57	1.21637	1.53842	1.60331	3.39166	1.97785	0.00938143	2.99974	0.472575	0.501829	2.46408	0.0067641	2.57059	4.84166	10.7979	0.0989587	-1.96123	0.944658	0.951495	0.960199	0.881754
		58	1.21556	1.5384	1.59419	3.22807	1.62154	0.00937142	2.66649	0.483904	0.818921	2.93613	0.00897469	1.70603	10.5197	11.145	0.0923775	-1.99843	0.949215	0.938306	0.956286	0.920623
		59	1.21581	1.5392	1.59419	3.22807	1.62154	0.00937139	2.38096	0.483904	0.818921	2.93614	0.00897469	1.78486	10.5197	10.7775	0.0936744	-1.99942	0.949208	0.94115	0.951081	0.920433
		60	1.15805	1.64041	2.06162	3.11856	1.81289	0.00998001	2.99043	0.340404	1.37497	0.3	0.001	4.69815	4.9142	11.6775	0.0914613	1.9939	0.927196	0.970376	0.937254	0.614239
QTS	1	1	1.22272	1.63944	2.95473	3.63409	1.67257	0.00838198	2.9058	0.508895	2.61006	0.403439	0.00100686	2.94194	2.61913	14.172	0.0940365	1.92126	0.929276	0.96527	0.924085	0.856309
		2	1.22276	1.63944	2.96011	3.63409	1.67257	0.00838198	2.9058	0.508895	2.27664	0.403439	0.00101279	2.9419	2.62222	10.1224	0.0940428	1.92126	0.924385	0.9653	0.924082	0.878579
		3	1.2027	1.46315	2.94147	3.49349	1.91919	0.00871984	2.15175	0.373493	0.770158	2.88205	0.00661764	2.14937	7.49041	10.235	0.0966258	-1.99716	0.949235	0.951885	0.915177	0.918586
		4	1.20287	1.46441	2.88388	3.52393	1.99318	0.00874326	2.20694	0.364644	0.874062	2.88308	0.00706991	2.46898	19.4838	1.94625	0.0963477	-1.99992	0.944617	0.958364	0.91826	0.940708
		5	1.20332	1.38967	2.89507	3.49923	1.92824	0.00872243	2.12095	0.354554	1.18184	2.86669	0.00684186	2.4684	19.4772	3.27595	0.0966756	-1.99426	0.94925	0.945775	0.880935	0.937938
		6	1.2027	1.46441	2.95941	3.49326	1.92829	0.00874423	2.20658	0.364381	0.876218	2.88384	0.00913972	2.4215	19.2491	1.73825	0.0963554	-1.99987	0.941727	0.96241	0.91699	0.940693
		7	1.2006	1.46441	2.96539	3.52118	1.9932	0.00874317	2.20697	0.370623	0.876223	2.88173	0.00919022	2.41932	19.2524	2.94974	0.0969469	-1.99992	0.944113	0.96111	0.918293	0.937649
	2	8	1.55919	1.64764	2.47025	3.32934	1.01196	0.00621945	2.01458	0.421944	2.18506	1.12443	0.00101798	1.19978	5.51081	15.3361	0.099784	-1.77263	0.547941	0.955696	0.64506	0.940305
		9	1.42798	1.64767	2.53406	3.15653	0.98311	0.0063881	2.22499	0.317651	2.11702	1.33172	0.00106853	2.7734	11.3966	2.51224	0.0968081	-1.69642	0.786477	0.960182	0.774106	0.921231
		10	1.3908	1.61282	2.72816	2.85442	0.905904	0.00728542	1.9584	0.382678	2.25327	1.16771	0.00105442	4.4359	11.731	6.83636	0.00165888	-1.53504	0.835315	0.965089	0.811606	0.855512
		11	1.55368	1.64764	2.47025	3.24453	1.01047	0.00621945	2.01458	0.322601	2.19239	1.2862	0.0010183	2.74818	4.26093	3.10936	0.0997478	-1.52968	0.534479	0.965033	0.720926	0.899327
		12	1.21552	1.63524	2.26047	3.10617	1.94372	0.00920012	1.54798	0.3	1.2137	2.90718	0.0049278	2.31056	11.6713	7.02821	0.1	-1.62505	0.949503	0.936407	0.86874	0.935597
		13	1.19828	1.4712	2.26209	3.46558	1.88367	0.00901519	1.59389	0.300373	1.04684	2.86411	0.00668759	2.45358	4.39658	7.32741	0.0997711	-1.69793	0.949246	0.948404	0.832769	0.927332
		14	1.22493	1.49774	2.86103	3.71598	1.27481	0.00643969	1.94062	0.410148	2.21518	1.23084	0.00104794	4.65296	15.7902	6.18908	0.00135295	-1.56629	0.934149	0.961133	0.871171	0.908062
		15	1.19828	1.46668	2.26209	3.46558	1.88367	0.00901519	1.66438	0.300373	1.04684	2.86521	0.0048068	2.45317	4.39658	7.28285	0.0997504	-1.69793	0.949391	0.9437	0.836859	0.932751
		16	1.20282	1.6412	2.24238	3.15554	1.82535	0.00918211	2.24034	0.321042	0.778288	2.97071	0.00573158	2.45103	12.4287	2.5951	0.0999242	-1.69648	0.944104	0.952187	0.922531	0.940373
		17	1.22493	1.61491	2.86103	3.71523	1.27481	0.00643969	1.9441	0.410148	2.21069	1.22379	0.00111672	4.45152	4.03732	8.34279	0.00166691	-1.5197	0.932259	0.960232	0.792506	0.918455
		18	1.1985	1.55944	2.46312	3.59766	1.98138	0.00898411	1.54285	0.316399	0.849357	2.8816	0.00436098	2.72411	15.5422	2.50214	0.0970912	-1.72899	0.944338	0.955175	0.866237	0.937227
	3	19	1.23824	1.58568	2.49136	2.48435	1.06289	0.00922868	2.359	0.531114	0.499054	2.98267	0.00675125	1.64656	7.67889	7.57332	0.0992981	-1.70372	0.933687	0.951221	0.940547	0.940013
		20	1.15298	1.14771	2.87105	3.6729	0.894035	0.00855778	1.69519	0.370242	0.923355	2.98252	0.00715031	2.63767	7.42718	1.93545	0.0972181	-1.99889	0.945984	0.955509	0.537382	0.937705
		21	1.62997	1.64913	2.4217	3.33277	1.14891	0.00709887	2.45188	0.318672	2.7317	0.942433	0.00117201	2.61225	4.5298	4.85482	0.0951015	-2	0.292052	0.965187	0.785676	0.866191
		22	1.15007	1.1482	2.8711	3.69647	0.926555	0.00855433	1.70031	0.410759	0.92151	2.9785	0.00642931	2.54379	4.32055	4.89218	0.0987947	-1.99856	0.949267	0.95025	0.557115	0.931776
		23	1.18006	1.1553	2.4978	2.5567	1.05711	0.00839646	1.96271	0.342902	0.62973	2.95051	0.00503318	2.01036	11.3627	6.81426	0.1	-1.90383	0.939738	0.938529	0.727426	0.940898
		24	1.57871	1.63346	2.42194	3.30958	1.14245	0.00718466	2.33624	0.486318	2.73824	0.898023	0.00116854	1.08275	8.06208	14.5898	0.0946603	-2	0.483749	0.955044	0.69446	0.941355
		25	1.15144	1.13584	2.86563	3.64175	0.89114	0.00855884	1.57647	0.365667	1.29158	3	0.00720844	2.63767	7.41098	1.93545	0.0972095	-1.99889	0.949328	0.947424	0.511828	0.935474
		26	1.57995	1.64904	2.34401	3.2989	1.14859	0.00718714	2.3517	0.407143	2.40085	0.916266	0.00100166	1.39357	10.9139	11.1359	0.0999672	-2	0.456833	0.961331	0.731261	0.935503
		27	1.57689	1.65	2.40832	3.34941	1.15208	0.00707542	2.35908	0.486235	2.28267	0.92414	0.0011103	1.58745	7.56144	7.56637	0.0930712	-2	0.474635	0.96033	0.661851	0.934565
		28	1.55436	1.64687	2.4213	3.29336	1.13614	0.00727866	2.29342	0.467906	2.09557	0.988003	0.001146	1.66878	1.72382	13.9507	0.0931877	-2	0.5491	0.961161	0.730748	0.921459
	4	29	1.17178	1.23561	2.71733	3.5531	1.99432	0.00883027	2.13894	0.315048	1.11218	2.97427	0.00801079	2.16678	17.368	5.07328	0.0960723	-1.99975	0.949283	0.95229	0.711629	0.936401
		30	1.1715	1.29374	2.80134	3.55605	1.98678	0.00880858	2.14045	0.320173	0.849087	2.97625	0.00794517	2.13913	17.4165	8.67256	0.0998383	-1.96443	0.949367	0.956445	0.767283	0.924847
		31	1.17172	1.30624	2.81609	3.53137	1.97784	0.0088054	2.14085	0.319925	0.837633	2.97446	0.00824931	2.16869	19.9404	4.02359	0.0995375	-1.99807	0.945344	0.961347	0.783067	0.940364
	5	32	1.1716	1.13673	2.10868	2.91	1.17775	0.00910935	2.41338	0.405322	1.13461	2.91328	0.00829615	2.03862	12.1393	6.80169	0.0998624	-1.99131	0.950182	0.936815	0.659278	0.933103
		33	1.14135	1.04443	2.52487	3.28544	1.76889	0.0089868	2.66068	0.391277	1.03911	2.90432	0.0112012	2.49246	19.0876	2.21428	0.0995556	-1.99089	0.944747	0.958232	0.518462	0.938613
		34	1.28488	1.64637	2.52506	2.82707	1.34469	0.00745891	2.98867	0.391284	2.4807	0.847547	0.0010052	3.76602	19.462	1.19444	0.0994104	-1.99139	0.921368	0.961724	0.786109	0.909317
		35	1.17143	1.09111	2.10868	2.91	1.17819	0.0091196	2.41317	0.407647	1.14071	2.90698	0.00594721	2.12864	12.1393	6.80117	0.0998624	-1.99131	0.950268	0.923172	0.585818	0.935942
		36	1.14136	1.0733	2.52495	3.18813	1.58147	0.00898367	2.83626	0.389433	0.793956	2.90445	0.0112012	2.36366	19.4509	2.20324	0.0996848	-1.99086	0.941221	0.956621	0.567819	0.940497
		37	1.40709	1.64637	2.65091	2.87519	1.16486	0.00763389	2.99844	0.399439	2.4811	0.944634	0.0010052	2.80351	19.6063	2.22041	0.0997484	-1.98858	0.819885	0.960045	0.789344	0.920414
		38	1.40699	1.64637	2.65824	2.82687	1.1459	0.00763409	2.0638	0.42842	2.49774	0.946627	0.00100013	3.54008	7.57936	1.23225	0.0568428	1.7201	0.810905	0.965248	0.758044	0.892479
		39	1.17153	1.2063	2.11512	2.91917	1.52036	0.00934993	2.41545	0.401036	0.80053	2.91547	0.00764594	2.49824	19.2645	2.23908	0.0942678	-1.99226	0.944953	0.952115	0.743047	0.940511
		40	1.39024	1.63392	2.52779	2.88798	1.13237	0.00762106	1.89287	0.428028	2.6069	1.02184	0.0012764	3.33629	12.6976	1.22677	0.0578482	-1.91363	0.83131	0.963243	0.769421	0.910089
	6	41	1.26601	1.6156	2.62228	3.35423	0.728933	0.00677738	2.20619	0.302968	2.95861	1.10269	0.001	3.49509	2.60612	4.78483	0.1	-1.8284	0.9265	0.960212	0.86124	0.922086
		42	1.2066	1.48244	2.67744	3.24517	0.815384	0.00718843	2.14059	0.31332	2.54731	0.967224	0.00107237	4.85882	19.9284	5.00277	0.0992784	-1.80909	0.939262	0.96008	0.898431	0.823557
		43	1.35876	1.63816	2.6223	3.41506	0.815488	0.0069613	2.66296	0.342035	2.85755	0.971402	0.00105202	3.61237	2.10539	3.09999	0.0999098	-1.77748	0.870429	0.965395	0.856177	0.896968
		44	1.19413	1.53528	2.67349	2.64303	1.32957	0.00912345	2.71764	0.334753	0.757024	2.97887	0.00775178	2.51638	19.4684	2.24699	0.0989216	-1.78486	0.944232	0.951716	0.933566	0.940985
		45	1.19221	1.338	2.17425	2.31654	0.77654	0.00912879	1.71226	0.418444	0.892483	3	0.00603046	2.02112	1.15991	9.54726	0.0998339	-1.80945	0.949976	0.939618	0.851846	0.934694
		46	1.19306	1.53903	2.64505	2.71096	1.21969	0.00912354	2.74239	0.333688	0.756782	2.93388	0.00908607	2.37435	18.5845	2.24501	0.0957044	-1.81022	0.942888	0.95644	0.930282	0.940431
		47	1.19507	1.34482	2.17432	2.33363	0.77573	0.00908274	1.70224	0.432969	0.919775	2.97734	0.00493309	2.02995	1.38127	9.2367	0.0995378	-1.81475	0.949773	0.934048	0.864554	0.935863
		48	1.19104	1.54216	2.66776	2.74854	1.20051	0.00910301	2.70964	0.328178	0.768664	2.9288	0.00903723	2.50747	19.5061	2.33344	0.0890007	-1.81196	0.94407	0.957271	0.925993	0.938487
		49	1.35876	1.61345	2.6223	3.41506	0.815488	0.0069613	2.91337	0.342035	2.81185	0.971402	0.00105202	2.73801	11.8578	3.09999	0.0916217	-1.77748	0.861507	0.960277	0.875398	0.927603
		50	1.21349	1.61337	2.67495	3.57164	0.808569	0.00718611	2.21557	0.3	2.81134	1.20121	0.00107352	4.56598	3.37425	1.19317	0.0274322	-2	0.935137	0.961236	0.893888	0.913958
		51	1.26588	1.61412	2.67496	3.57164	0.808569	0.0067805	2.17089	0.3	2.54709	1.1053	0.00100545	4.56598	5.41581	1.19317	0.0328816	-2	0.925921	0.965356	0.871926	0.88982
	7	52	1.18301	1.62175	2.98264	3.49198	1.88547	0.0087234	2.95168	0.375292	2.23097	0.564298	0.00102817	4.48531	2.26342	4.62683	0.0110067	2	0.926218	0.965478	0.953555	0.878628
		53	1.18144	1.47228	2.98412	3.64643	0.910726	0.00855236	2.54589	0.307787	0.931082	2.85776	0.00826867	2.53411	1.49033	2.8777	0.0825561	-1.94523	0.946123	0.956145	0.85699	0.936973
		54	1.18472	1.6355	2.38645	3.72431	1.72641	0.00895615	2.95198	0.375395	2.89937	0.421924	0.00100177	4.44192	16.8914	1.45701	0.0907229	1.99978	0.924168	0.970029	0.95532	0.832862
		55	1.18642	1.47175	2.94557	2.90888	0.776515	0.00895836	2.30983	0.309734	1.0676	2.94977	0.00544842	2.60733	12.9096	2.79849	0.0985627	-1.94564	0.949462	0.937226	0.84796	0.937573
		56	1.18301	1.62164	2.52434	3.49198	0.778071	0.00871269	2.95752	0.376688	2.23097	0.564298	0.00102817	4.48531	2.52908	4.62683	0.0110067	1.99267	0.929532	0.965093	0.955281	0.865904
		57	1.18283	1.63622	2.38155	3.74252	1.72641	0.00895565	2.87799	0.375395	2.89778	0.421918	0.00100177	4.43884	14.8294	4.60785	0.0952348	1.99925	0.929045	0.97001	0.953166	0.785809
		58	1.19059	1.62518	2.9698	2.93611	0.772524	0.00920309	2.96204	0.311868	0.658188	2.99475	0.00817919	2.11779	12.8034	2.87734	0.0995865	-1.98113	0.940501	0.956283	0.920307	0.940462
		59	1.17752	1.24544	2.94238	3.70574	0.9633	0.00856996	2.91785	0.302052	1.1027	2.99474	0.0113036	2.82899	2.08806	2.84368	0.00696427	-1.99155	0.93965	0.960105	0.684452	0.936909
		60	1.18275	1.60366	2.94044	3.64683	0.592506	0.008557	2.96844	0.375524	2.90334	0.423182	0.00100064	3.00713	15.0041	12.8509	0.0991336	1.99928	0.933846	0.965067	0.941182	0.837539
	8	61	1.13581	0.988047	2.35348	3.4615	2	0.00902488	1.62041	0.36026	1.10516	2.99755	0.00790528	2.45235	2.85694	5.7272	0.0611086	-1.99842	0.949302	0.947085	0.311611	0.930933
		62	1.16217	1.28375	2.19565	3.3231	1.99824	0.00916374	2.56915	0.335554	0.7634	2.99657	0.00987754	3.06213	8.50905	13.2676	0.00100664	-1.99886	0.939647	0.960907	0.80962	0.940349
		63	1.10919	0.94156	2.18568	3.52695	1.9547	0.00902491	1.63686	0.306609	1.11805	3	0.00834878	3.44795	15.8556	1	0.00100001	-1.99844	0.944889	0.95864	0.186062	0.93782
QES	1	1	1.24844	1.18838	2.69598	3.52716	0.56665	0.00502298	2.89339	0.727234	1.0978	2.73668	0.0044057	2.12347	17.533	7.18939	0.0997741	1.72984	0.949171	0.83578	0.950306	0.926235
		2	1.26076	1.19599	2.89843	1.51317	1.44681	0.00999212	2.67786	2.96163	0.313127	2.73809	0.00392864	1.20749	19.2274	8.72701	0.0998022	1.47494	0.856189	0.609244	0.887654	0.944785
		3	1.21704	1.1783	2.70375	2.0672	1.69775	0.0095189	2.15275	1.2034	1.09799	2.78913	0.00247936	2.25867	18.5372	6.08758	0.0941282	1.43945	0.944276	0.792796	0.868784	0.939719
		4	1.26206	1.20344	2.47713	2.1268	1.70147	0.00769773	2.99519	0.700126	0.34918	2.98278	0.00295639	1.4922	19.255	8.95331	0.0995735	-1.53267	0.909368	0.894495	0.945352	0.940986
		5	1.23525	1.22944	2.92981	1.73493	1.72154	0.00931723	2.79161	0.942865	0.76438	2.73987	0.00288616	1.80117	18.8304	8.97783	0.1	-1.63398	0.941624	0.868733	0.925128	0.94053
		6	1.18468	1.03059	2.86474	2.39395	0.966213	0.00999212	2.60044	2.03875	0.316715	2.96152	0.0039643	1.21874	15.8547	8.78756	0.0999242	0.733574	0.881606	0.662406	0.485328	0.944902
		7	1.21773	1.18866	2.7057	1.48591	0.938596	0.00999322	1.76776	2.92079	0.3037	2.78266	0.00443162	1.23948	18.523	8.92129	0.0994933	1.24226	0.866243	0.806015	0.841014	0.944914
		8	1.20942	1.1936	1.24554	3.66248	0.57349	0.00539425	2.99885	0.545384	1.11897	2.87437	0.0115677	3.33944	12.8076	1.12467	0.00104276	-1.72271	0.940091	0.882028	0.95551	0.930701
		9	1.32892	1.21668	2.32682	2.9334	1.67481	0.00834305	2.99321	2.68082	0.361881	2.7272	0.00471518	1.17029	18.5463	8.32296	0.097846	0.422911	0.810377	0.892205	0.925184	0.944903
		10	1.21681	1.2396	1.79958	2.20981	1.04164	0.00765184	2.9941	0.520306	0.763767	2.72959	0.00472075	2.26208	18.3245	4.88984	0.0950011	1.81258	0.943879	0.887738	0.951638	0.935345
		11	1.25286	1.18544	1.03612	3.74796	0.541463	0.0047784	3	0.508587	1.07243	2.85258	0.00449478	3.53446	17.5529	10.5862	0.001	1.70018	0.94481	0.851874	0.955519	0.928682
		12	1.26292	1.1843	2.71767	2.13456	1.77742	0.007705	2.88014	0.730753	0.493589	2.89153	0.00523095	1.5679	18.9518	8.32231	0.095728	1.28372	0.922834	0.885636	0.942915	0.94007
		13	1.22117	1.18844	2.94037	2.77408	1.44431	0.00750359	2.85247	0.948439	0.563398	2.78628	0.00445747	1.77692	18.8226	7.35179	0.0998423	1.22385	0.937107	0.908016	0.936679	0.939829
		14	1.22615	1.1889	2.83222	2.39775	0.992119	0.00717765	2.58865	0.633589	1.18216	2.79278	0.00500353	2.5051	18.034	5.36907	0.0994251	1.54834	0.949217	0.869091	0.940762	0.932653
		15	1.19231	1.05567	2.99825	1.47823	0.509214	0.00997883	2.60562	2.92079	0.304587	2.96152	0.00398275	1.21874	19.2356	8.79155	0.0999207	0.760958	0.875169	0.744391	0.571565	0.944922
		16	1.22346	1.23892	1.76635	2.05307	1.09362	0.00915614	2.9941	0.549281	1.04403	2.72959	0.00472181	2.16897	18.5104	7.05991	0.0999799	1.95498	0.949559	0.805491	0.913699	0.93601
	2	17	1.24434	1.62106	1.81071	2.33401	0.958044	0.00995939	2.99722	0.403296	1.11844	2.88194	0.00422611	2.47416	19.7348	3.7277	0.098856	-1.28064	0.95076	0.871723	0.958287	0.937895
		18	1.24436	1.53352	2.04837	2.33349	1.91166	0.00995714	2.99722	0.435478	0.816777	2.86305	0.00423078	1.97794	5.45054	8.35163	0.0988558	-1.29949	0.946808	0.799156	0.956856	0.940024
	3	19	1.25992	1.52605	1.03659	3.32571	1.72158	0.00944989	2.98971	0.45486	1.1129	2.9935	0.00440234	2.39968	19.5774	4.33993	0.0999763	1.45534	0.950785	0.834352	0.961049	0.938115
		20	1.27903	1.52668	1.0491	3.32403	1.74918	0.00944133	2.99973	0.436227	1.09446	2.97906	0.00304555	2.30682	19.9905	5.08584	0.0998372	0.361696	0.94696	0.832909	0.961245	0.94001
	4	21	1.24331	1.39952	2.06875	3.35252	1.7133	0.00854669	2.99994	0.500169	1.03869	2.95041	0.00459995	2.33641	10.8997	5.52125	0.0999361	-0.709621	0.950416	0.850424	0.958518	0.937053
		22	1.24404	1.39017	2.65861	3.07113	1.74233	0.00830774	2.99949	0.5006	0.820367	2.9379	0.00275951	1.99064	11.1563	7.88377	0.0999411	1.18775	0.945259	0.862489	0.95682	0.940106
	5	23	1.25002	1.50394	1.26736	3.72205	1.85918	0.00894478	2.99664	0.451788	1.04524	2.96725	0.00463576	2.41008	19.886	4.04964	0.099685	-1.86534	0.950609	0.894682	0.962311	0.937922
		24	1.25002	1.50386	1.26738	3.72196	1.85987	0.00894493	2.99663	0.444923	0.872546	2.96793	0.0045026	2.41028	19.886	2.99051	0.0996865	-0.667642	0.947381	0.874347	0.962355	0.940041
	6	25	1.25107	1.48027	1.58721	2.81743	1.28532	0.00930649	2.99943	0.501448	1.03072	2.99956	0.00364535	2.30499	17.2612	5.57135	0.0995611	-1.99953	0.951253	0.879198	0.959209	0.937802
		26	1.2504	1.48023	1.28228	2.81914	1.56438	0.00960576	2.99832	0.501088	0.798564	2.99781	0.00361934	2.0939	17.4919	5.77683	0.0995646	-1.72434	0.94723	0.908736	0.958801	0.940028
	7	27	1.23492	1.48312	1.6048	3.37259	1.94798	0.00913303	2.9633	0.466061	0.757606	2.94264	0.00538251	2.16951	16.9642	4.29702	0.099988	-0.513931	0.946119	0.879674	0.961867	0.940133
		28	1.23508	1.48357	1.69309	3.37259	1.95874	0.00912498	2.9684	0.465662	0.949614	2.89433	0.00536577	2.20712	16.961	4.95015	0.0999667	-0.511757	0.949737	0.853805	0.961862	0.938021
	8	29	1.25718	1.39321	1.97566	2.61552	1.69263	0.00921914	2.99264	0.518618	0.902805	2.99863	0.00276241	2.07482	19.426	6.86499	0.099332	0.835874	0.946704	0.825362	0.955002	0.940241
		30	1.25822	1.38983	1.95161	3.53626	0.838404	0.00761658	2.99253	0.486913	1.08943	2.91883	0.00356076	2.19203	19.2124	5.7227	0.1	1.36043	0.949585	0.863232	0.960815	0.935012
TES	1	1	1.81566	1.47938	0.436455	3.70068	0.945201	0.00722298	2.38494	0.301923	1.16271	1.32097	0.00113647	1.01706	3.62707	8.09204	0.0588082	1.5348	-0.599948	0.951657	0.919563	0.939998
		2	1.8643	1.31029	0.342728	3.64369	0.946761	0.00719951	2.88682	0.301216	1.18199	1.32537	0.00100005	2.01257	7.13	3.95321	0.0125194	1.60942	-0.933385	0.960219	0.960081	0.90145
		3	1.81494	1.46697	0.512416	3.64807	0.93344	0.0072493	2.57268	0.300243	1.18107	1.16983	0.00100015	1.64049	4.66695	3.8375	0.0502662	1.80196	-0.632112	0.960635	0.927428	0.9167
		4	1.86219	1.30998	0.338341	3.64389	0.947931	0.00720004	2.89344	0.300301	1.16429	1.3261	0.00103516	1.67048	3.2956	7.29414	0.00934983	1.54032	-0.914901	0.952337	0.960116	0.931547
		5	1.82692	1.33826	0.447023	3.64827	1.00869	0.00721587	2.88324	0.306766	1.24294	1.07232	0.001	1.06034	7.0415	7.69043	0.0929118	1.7499	-0.760871	0.955739	0.958416	0.930706
		6	1.65603	1.33646	0.470399	3.64998	1.63975	0.00803672	2.92125	0.352776	0.395818	2.99901	0.00723833	1.00022	5.17829	7.15918	0.0691858	-1.90728	0.0321774	0.940215	0.960696	0.941608
		7	1.86296	1.31922	0.339412	3.64732	0.946531	0.00719951	2.89085	0.301016	1.04692	1.2669	0.00100008	1.6758	8.40131	3.88458	0.0211142	1.60941	-0.946889	0.956523	0.960067	0.921777
		8	1.81874	1.29918	0.424337	3.63641	0.947954	0.00721857	2.40341	0.386989	1.14581	1.31395	0.00116724	1.03864	3.69165	7.89156	0.0476559	1.53405	-0.692855	0.946174	0.955148	0.940039
		9	1.85153	1.33212	0.5122	3.65369	1.00641	0.00715867	2.88572	0.300248	1.25754	1.16349	0.0010002	1.45336	3.03155	5.19653	0.0802865	1.70724	-0.881569	0.960156	0.957135	0.914266
		10	1.83966	1.34047	0.447023	3.64827	1.0086	0.0072172	2.87256	0.306262	1.24294	1.07359	0.00105443	1.05476	5.20882	7.73409	0.0587112	1.81388	-0.811444	0.952225	0.958192	0.936489
		11	1.86143	1.3108	0.339672	3.64393	0.946503	0.00719905	2.89358	0.300398	0.91492	1.32627	0.00101937	1.48194	3.33831	7.2707	0.0121014	1.55562	-0.941833	0.948561	0.960385	0.936247
		12	1.81521	1.46583	0.434034	3.64393	0.949291	0.00726111	2.57325	0.300626	1.15061	1.26246	0.001003	1.64049	4.70855	7.43737	0.00984423	1.80196	-0.592645	0.95616	0.92424	0.936623
	2	13	1.73632	1.05031	-0.380437	3.72476	1.01733	0.00542599	2.98428	2.76178	2.56445	1.23924	0.00100111	1.69588	6.68352	6.22572	0.0948749	-1.95571	-0.321859	0.955165	0.955089	0.922239
		14	1.7656	1.06937	-0.622024	3.71971	1.04206	0.00609317	2.98846	2.66203	1.81156	1.22964	0.00101334	1.03444	19.8462	7.93291	0.0705926	-1.99303	-0.496488	0.945878	0.955338	0.940007
		15	1.74827	1.32558	2.68212	2.94702	1.0168	0.00782921	2.50929	1.0579	1.84416	1.26625	0.00518523	1.00555	18.6852	7.31401	0.0949817	-1.99301	-0.395749	0.93005	0.921283	0.945156
		16	1.73889	1.34395	2.99784	2.8012	0.879546	0.00825008	2.95965	1.10275	1.80105	1.45616	0.00734784	1.02742	18.8887	6.11025	0.0992834	-1.90432	-0.369678	0.945657	0.891402	0.945443
		17	1.77852	1.06659	-0.393037	3.74352	1.11346	0.00557194	2.98097	2.25862	2.09941	1.23254	0.00100586	1.14601	19.8162	8.40554	0.0858176	-1.99568	-0.511897	0.950627	0.955237	0.936817
		18	1.73816	1.34663	3	2.79566	0.87856	0.00825539	2.25859	1.08744	1.7982	1.53146	0.00738906	1.01732	18.9281	6.11143	0.0964629	-1.92452	-0.401798	0.941759	0.905589	0.945402
		19	1.73602	1.3137	2.68215	2.94691	1.08349	0.00782921	2.9588	1.01706	1.84436	1.28123	0.00612893	1.00509	18.7026	7.28726	0.0948145	-1.99192	-0.308538	0.936591	0.917339	0.945062
	3	20	1.969	1.50027	-0.0794061	3.7484	1.67406	0.00764374	2.76154	0.301128	1.5224	1.06197	0.00100072	2.21302	9.27646	17.57	0.00100227	1.87062	-1.44093	0.965289	0.876822	0.865622
		21	1.85753	1.45845	2.53567	3.7282	0.534834	0.00655444	2.48679	0.300324	1.56705	1.07493	0.00100039	1.01211	2.74011	10.8852	0.0887105	1.83709	-0.929961	0.960667	0.957028	0.92857
		22	1.58431	1.44767	2.41248	3.7492	0.612064	0.00645288	2.99966	0.303087	1.24741	1.05321	0.00100016	1.06508	2.40458	11.349	0.0885238	1.80069	0.284142	0.951016	0.958826	0.940109
		23	1.76189	1.40272	2.4848	3.72362	0.539286	0.00654455	2.75858	0.300126	1.88375	1.07746	0.00100028	2.74905	17.4766	11.6122	0.00157346	1.82742	-0.423301	0.965027	0.960032	0.851081
		24	1.86892	1.49624	2.48569	3.74725	0.537688	0.00656119	2.46511	0.300157	1.56719	1.0767	0.00100053	1.00241	4.75112	9.37357	0.0885467	1.83711	-0.976185	0.96037	0.95054	0.931248
		25	1.9696	1.3166	-0.107336	3.74902	1.51188	0.00757892	2.76201	0.301089	1.57356	1.12431	0.00100068	2.23729	9.50738	17.4175	0.00101746	1.83551	-1.59431	0.965004	0.957878	0.861839
		26	1.58418	1.38119	2.56321	3.70372	0.61226	0.00645	2.99985	0.330562	1.24687	1.05321	0.00100055	1.06515	2.193	11.0496	0.0825175	1.80053	0.268495	0.948358	0.962094	0.940257
		27	1.83625	1.40739	2.48476	3.74741	0.537472	0.0065605	2.79436	0.301121	1.9371	0.966085	0.00100024	1.00361	3.81396	8.95074	0.0729094	1.81584	-0.831059	0.955671	0.961227	0.936413
		28	1.83601	1.4143	2.53663	3.73197	0.536716	0.00654753	2.78601	0.300672	1.53143	0.966067	0.00100055	1.03788	12.1006	8.96845	0.0946944	1.78476	-0.846417	0.960348	0.960927	0.923742
	4	29	1.16126	1.6229	2.99663	1.93883	0.645936	0.0099857	3	0.470961	2.98771	0.350686	0.00100412	3.76781	2.44291	3.6053	0.0944271	1.99892	0.918642	0.965177	0.956193	0.883542
		30	1.16125	1.6229	2.99663	1.93883	0.645936	0.0099857	3	0.47097	2.98788	0.344973	0.00100412	4.40537	1.46635	3.6053	0.0944271	1.99892	0.920305	0.970009	0.956213	0.82819
		31	1.42718	1.5405	2.87914	2.81036	1.26594	0.00872591	2.999	0.34703	0.63747	2.47085	0.0100492	1.47734	9.95648	4.55276	0.0999575	-1.99644	0.695406	0.961165	0.960219	0.942516
	5	32	1.55673	1.40605	0.836758	2.77957	1.27953	0.0095245	2.94481	1.92771	0.401862	2.81193	0.00538787	1.01951	9.98503	7.89713	0.0870715	-1.92292	0.372952	0.945727	0.88805	0.945027
		33	1.55292	1.58295	0.842141	2.77173	1.27999	0.00952021	2.93235	0.30553	0.401864	2.78312	0.00520684	1.0207	9.17185	7.95748	0.0882967	-1.92004	0.395527	0.952813	0.958384	0.943402
		34	1.78414	1.31472	2.70301	3.69298	0.568794	0.0057499	1.87215	0.417862	2.26218	1.12414	0.00100872	1.56721	11.2757	4.17329	0.0788958	-0.34086	-0.539014	0.960099	0.945535	0.920249
		35	1.55251	1.58851	0.877678	2.76626	1.27957	0.00952514	2.94508	0.315508	0.404767	2.81098	0.00529482	1.71753	12.0833	2.90625	0.0612168	-1.92546	0.409854	0.955663	0.957844	0.930536
		36	1.78642	1.50157	2.998	3.73818	0.568951	0.0062542	1.73088	0.301171	2.27008	1.14374	0.00100866	1.51409	17.9151	4.04371	0.031352	0.989939	-0.503193	0.957677	0.918776	0.935022
		37	1.79492	1.50149	2.9928	3.70078	0.500964	0.00626315	1.87505	0.300791	2.43441	1.15768	0.00100866	1.51794	11.2334	4.16665	0.0652427	0.367684	-0.546084	0.960117	0.930144	0.927296
	6	38	1.73144	1.53169	2.72072	3.52289	0.501634	0.00708244	2.90133	0.300518	1.31071	1.22839	0.00119907	1.24825	2.46716	6.50873	0.0589408	1.84921	-0.286074	0.956225	0.962397	0.937036
		39	1.80518	1.52159	2.74769	3.65452	0.503107	0.006786	2.5843	0.300789	1.31311	1.22819	0.00101167	1.24698	2.48544	6.49859	0.0596045	0.98138	-0.643804	0.960465	0.956397	0.932645
		40	1.73407	1.52456	2.73662	3.63565	0.50182	0.00685406	2.5704	0.300689	1.47791	1.24048	0.001	2.09567	2.22325	2.29895	0.0431569	0.995598	-0.298078	0.965145	0.95624	0.898013
		41	1.72933	1.5219	2.76163	3.63916	0.503141	0.00678494	2.579	0.30079	1.5194	1.23809	0.00100359	2.16281	4.57806	2.55173	0.0266373	1.13647	-0.254345	0.96523	0.954764	0.901759
		42	1.72941	1.52177	2.72274	3.52031	0.50277	0.00707414	2.88297	0.300518	1.31071	1.23685	0.00303007	1.18653	2.4635	6.52079	0.0534364	-1.99292	-0.285696	0.951964	0.96229	0.940489
		43	1.73276	1.53183	2.72775	3.63317	0.507507	0.0070854	2.90139	0.300532	1.32351	1.13208	0.00100953	1.44986	2.45962	6.5085	0.0742895	1.79905	-0.309857	0.96194	0.962334	0.921768
	7	44	1.97697	1.09404	-0.721127	3.47651	1.02204	0.00565283	2.40721	0.742765	2.76238	1.04276	0.00100523	1.80708	1.54127	3.70555	0.0743581	1.12193	-1.62793	0.960489	0.951611	0.888442
		45	1.69218	1.36467	2.04932	3.43823	1.04996	0.00740392	2.43023	0.375989	2.0056	0.97523	0.0017584	1.00694	2.19811	12.7449	0.0944654	-1.99858	-0.119638	0.950716	0.956738	0.940667
		46	1.73828	1.36261	1.6796	3.40399	0.976113	0.00714687	2.97381	0.3	1.86753	0.994277	0.00143112	1.0328	1.40604	14.4804	0.0907116	-2	-0.276355	0.955051	0.956865	0.935341
		47	1.49014	1.29936	1.72562	3.30803	1.64259	0.00829712	2.9379	1.59475	1.21455	1.01662	0.00159214	1.04361	14.2237	10.3931	0.0935332	-1.99935	0.530097	0.93532	0.918887	0.945142
		48	1.69903	1.37099	1.7295	3.44833	1.00398	0.00745148	2.98981	0.300416	2.70969	0.946831	0.00167212	1.00139	1.57277	14.43	0.0934942	-1.97714	-0.101588	0.948071	0.960769	0.94071
		49	1.72044	1.36568	1.72827	3.43427	1.00001	0.00740763	2.95255	0.314984	1.99845	0.949246	0.00146802	1.00196	1.56737	14.2052	0.0943336	-1.99921	-0.220688	0.951913	0.960985	0.938075
		50	1.69903	1.37101	1.73869	3.44738	1.00194	0.00745141	2.98319	0.315005	2.00137	0.847197	0.00145166	1.56616	1.58648	14.2061	0.0945153	-1.99935	-0.111463	0.960431	0.961035	0.881263
		51	1.69903	1.38903	1.73869	3.44738	1.00194	0.00745141	2.98319	0.315005	2.00137	0.847197	0.00145166	1.11704	1.58648	14.2061	0.0945153	-1.99935	-0.133707	0.955913	0.961005	0.931421
		52	1.49072	1.29574	1.64517	3.31262	1.59815	0.00836218	2.36957	1.41828	1.21455	1.017	0.00158708	1.04289	14.0338	10.3826	0.0935959	-1.97359	0.504173	0.930402	0.93226	0.945113
	8	53	1.80183	1.30968	1.36084	3.15093	0.957854	0.00740072	1.92559	0.337135	2.39103	1.00693	0.00100953	1.31002	15.3615	7.28433	0.0931536	1.9994	-0.646053	0.960372	0.943547	0.9224
		54	1.84668	1.41071	1.35133	3.13404	0.936196	0.00729035	2.05117	0.3	2.4006	0.932561	0.00110639	1.01571	15.7032	9.81702	0.0992357	1.97882	-0.823133	0.960384	0.927241	0.930485
		55	1.5251	1.59262	1.61485	3.14173	1.40203	0.00914797	2.99761	0.316642	0.38178	2.91248	0.00659101	1.04472	10.6117	8.03506	0.0997549	-1.98343	0.458284	0.955008	0.960921	0.943187
		56	1.9883	1.31326	-0.980302	3.14804	0.966294	0.00820021	2.39716	0.307351	2.3689	0.852025	0.00100416	2.16009	14.3884	2.19935	0.00968436	1.99453	-1.75317	0.965821	0.955213	0.865426
		57	1.78588	1.34116	1.37785	3.14411	0.894001	0.00739659	2.7429	0.304854	2.39103	0.815737	0.00100776	1.36425	10.3579	7.27889	0.0930476	1.94848	-0.556615	0.961754	0.955401	0.916691
		58	1.83027	1.56567	1.37763	3.1452	0.974372	0.00750996	2.07089	0.303722	1.90989	1.17376	0.00112193	1.01052	15.6258	9.73953	0.0999521	1.95015	-0.610798	0.960074	0.860718	0.935044
		59	1.52548	1.36075	1.34217	3.55336	1.91262	0.00867257	2.07206	0.727431	0.494329	2.96914	0.00652821	1.04551	17.3071	7.03923	0.0970513	-1.98345	0.45832	0.953347	0.943706	0.945723
		60	1.80765	1.43301	1.3781	3.14679	0.962151	0.00739003	1.92581	0.304855	2.29085	0.942283	0.00100208	1.37495	9.63126	9.75335	0.0998108	1.98823	-0.604208	0.965172	0.920464	0.905531
		61	1.80884	1.49406	1.35703	3.15277	0.958415	0.0073841	2.15792	0.304848	2.25016	0.942283	0.00100071	1.37498	16.5232	7.45412	0.099805	1.98945	-0.565818	0.965088	0.895725	0.914247
		62	1.78588	1.58665	1.37784	3.1469	0.894001	0.00739659	2.74804	0.304848	2.39019	0.815737	0.00100783	1.36453	9.85411	7.27889	0.0930476	1.99365	-0.396223	0.965292	0.84447	0.921085
		63	1.84472	1.31326	-0.968008	3.148	0.966294	0.00822048	2.38492	0.306739	2.80254	0.85165	0.00106756	2.16009	7.87925	1.42552	0.0998148	1.99453	-0.863653	0.965097	0.95219	0.873617
QTES	1	1	1.21028	1.19018	1.98156	2.12132	1.05987	0.00957107	2.59875	0.337012	0.822766	2.73844	0.00277568	1.59614	15.8805	9.50831	0.0997178	-1.49014	0.934581	0.898583	0.721426	0.940702
		2	1.22196	1.45329	2.79189	3.7474	1.04641	0.00702986	2.44577	0.38571	1.97579	1.15865	0.00114106	3.64846	11.2069	1.88763	0.0852075	-1.55908	0.934141	0.95507	0.937215	0.919407
		3	1.22468	1.31117	1.74982	3.73168	1.73428	0.00798382	2.66167	0.573056	0.893927	2.556	0.00476302	2.74902	12.6269	1.92251	0.0601846	-1.25834	0.944848	0.919295	0.955031	0.935418
		4	1.21043	1.48336	2.93303	2.14455	1.053	0.00944496	2.74504	0.366482	0.942272	1.54321	0.00101346	1.59652	15.3653	9.50831	0.0869675	-1.48758	0.92794	0.859454	0.930202	0.940809
		5	1.38329	1.45738	2.95339	3.73948	0.980903	0.00712828	2.95655	0.358793	1.36771	1.67426	0.00131978	1.6968	15.6406	7.37048	0.0683409	-1.45696	0.828296	0.925445	0.96075	0.93853
		6	1.2244	1.28626	2.80049	3.50435	0.825611	0.00694722	2.63042	0.574984	1.90503	1.10229	0.00100002	4.53306	1.12881	1.23826	0.0770758	-0.999197	0.934806	0.955039	0.953415	0.883582
		7	1.21696	1.46946	2.00657	2.12162	1.11554	0.0094458	2.60736	0.337012	0.908825	1.62126	0.00278472	1.59615	15.8805	9.50831	0.0999121	-1.32207	0.929154	0.916917	0.925413	0.940017
		8	1.20913	1.4623	2.79189	3.74795	1.04786	0.00703043	2.9821	0.38571	1.95794	0.957363	0.00101013	3.65185	5.65217	1.86648	0.0852075	-1.55908	0.930204	0.955088	0.9454	0.919838
		9	1.37017	1.46495	2.82742	3.7431	1.30995	0.00782142	2.95674	0.445341	1.42168	1.18574	0.0015144	1.64769	19.4304	7.16409	0.0730654	-1.69967	0.821562	0.926817	0.960894	0.940117
		10	1.22156	1.48931	2.8945	3.744	1.0663	0.00701928	2.65096	0.325026	1.89126	1.15782	0.0010106	4.35138	1.0375	1.88469	0.078922	-1.1525	0.934716	0.960425	0.931145	0.892137
		11	1.23552	1.4833	2.04787	3.66881	0.842951	0.00814074	2.65858	0.575425	1.14796	2.99606	0.00562899	2.74192	5.26924	3.85984	0.0673175	-0.671759	0.950163	0.863569	0.956445	0.92512
		12	1.39289	1.31968	2.7721	3.62171	1.07172	0.00688129	2.78858	0.438386	1.96479	0.908738	0.00103052	3.37302	6.72798	1.51178	0.0372002	-1.49831	0.767867	0.960285	0.95739	0.888715
		13	1.38329	1.45824	2.95339	3.73947	0.980903	0.00712828	2.95655	0.358793	1.36771	2.48688	0.00131978	1.6968	11.7511	7.37134	0.0683409	-1.45358	0.863636	0.880575	0.960711	0.936681
		14	1.21925	1.31083	1.74982	3.73168	1.73428	0.00798382	2.66105	0.569865	0.893927	2.59478	0.00476302	2.73186	12.6269	1.92251	0.0604518	-1.63237	0.945005	0.920413	0.954878	0.935337
		15	1.27654	1.46215	2.79228	3.74794	1.04362	0.00703053	2.98187	0.385971	1.98721	0.959222	0.00102508	3.69416	5.69927	1.85898	0.0755897	-1.55921	0.914731	0.96011	0.949745	0.902583
		16	1.22196	1.61372	2.99763	3.74203	1.6923	0.00850524	2.81231	0.441253	0.848708	2.87659	0.0104644	1.91828	1	4.10958	0.080744	-1.90418	0.93978	0.950763	0.953836	0.933591
		17	1.22716	1.44848	2.9138	3.74801	1.03341	0.00703082	2.49307	0.38571	1.97579	1.15865	0.00114106	4.18248	11.2069	1.88763	0.0789447	-1.55884	0.937258	0.95635	0.943133	0.892483
		18	1.21028	1.18	1.98156	2.12132	1.13703	0.0095543	2.59816	0.440912	0.822766	2.73844	0.00277568	1.8722	1.67545	9.50831	0.0990583	-1.11424	0.938971	0.88458	0.781332	0.940557
		19	1.21011	1.45018	2.91651	3.72385	1.05649	0.00756862	2.99616	0.429167	0.841813	2.42719	0.00485888	2.77786	1.21824	3.53623	0.0603059	-1.22256	0.944484	0.928107	0.961585	0.934084
		20	1.20334	1.46095	2.79856	3.7495	1.64832	0.0069114	2.17237	0.328813	0.82718	1.27861	0.00100802	1.64666	15.271	9.51558	0.0999428	-1.57936	0.919487	0.925566	0.909585	0.940255
		21	1.22209	1.6472	2.8993	3.74766	0.753874	0.0087976	2.55885	0.451453	0.846788	2.69496	0.00453978	2.14237	1.36989	4.15805	0.07445	-1.90669	0.944587	0.940531	0.949135	0.935511
		22	1.30928	1.44624	2.64827	3.42006	1.19693	0.00804525	2.72747	0.357788	1.22194	1.76683	0.00271868	1.68825	14.1391	7.62914	0.0801818	-1.46206	0.894669	0.914516	0.94895	0.940005
		23	1.22709	1.44852	2.90626	3.72563	1.03394	0.00697907	2.74673	0.366283	2.48507	0.93141	0.00100001	4.21165	11.6301	1.51939	0.0794175	-1.49987	0.932903	0.960706	0.942341	0.896043
		24	1.22526	1.45984	2.79138	3.65045	0.984559	0.006978	2.04405	0.333077	1.95729	1.24912	0.00101114	3.64288	4.67595	7.32121	0.0878735	-1.55264	0.939236	0.955644	0.908905	0.891578
		25	1.23061	1.4834	2.83921	3.73969	0.82961	0.00814074	2.65858	0.569814	0.860474	2.9817	0.00562899	2.74192	5.27086	3.88361	0.0724428	-1.40428	0.949476	0.910283	0.94898	0.922182
		26	1.22488	1.48888	2.93303	2.14455	1.05411	0.00941321	2.75789	0.366482	1.42373	1.54321	0.00101346	1.78781	15.3653	9.50831	0.0875658	-1.48758	0.932333	0.832701	0.934826	0.940158
		27	1.3247	1.18765	2.98314	2.93961	1.00724	0.00751255	2.87649	0.361412	0.881376	2.45583	0.008767	2.07415	13.7074	2.37908	0.0750336	-1.70609	0.844849	0.944827	0.872597	0.940175
		28	1.22209	1.6472	2.96499	3.69995	1.70835	0.00879721	2.63626	0.451057	0.823101	2.39329	0.00307253	2.14237	15.1935	4.13612	0.0751579	-1.9036	0.94178	0.928095	0.950829	0.937735
		29	1.20754	1.64634	2.05667	3.63474	1.05682	0.00887188	2.99685	0.465099	0.846788	2.32712	0.0120315	2.11861	14.7881	2.00529	0.0930238	-1.89653	0.935543	0.950446	0.956361	0.936066
		30	1.27654	1.46215	2.79183	3.7458	1.04362	0.00702998	2.98187	0.385971	1.88462	0.95261	0.00102508	3.61196	5.76521	1.85267	0.0755897	-1.55921	0.912684	0.959952	0.95021	0.904338
		31	1.32234	1.17262	2.70126	3.58165	1.05466	0.0076948	2.91712	0.386101	0.580299	2.72296	0.0110262	1.74254	16.1285	2.20748	0.0957007	-1.51259	0.796271	0.945325	0.80931	0.940902
		32	1.21559	1.61118	2.99731	3.73637	1.02059	0.00850991	2.80886	0.441183	0.938472	2.87659	0.0101652	1.91828	1.50299	5.48052	0.0801969	-1.25414	0.944687	0.94394	0.957685	0.93176
		33	1.39222	1.31968	2.7721	3.68812	1.07172	0.00688498	2.78578	0.438386	1.96608	1.15244	0.00113897	3.38934	6.72798	1.28954	0.0372002	-1.49831	0.788512	0.956134	0.958421	0.900221
		34	1.37184	1.45738	2.95344	2.70051	0.985979	0.00804299	2.95655	0.369059	1.36771	1.74024	0.00131978	1.71819	15.8331	7.32614	0.0723314	-1.45278	0.847761	0.881941	0.956494	0.940862
		35	1.37458	1.34092	2.86951	3.70971	1.00678	0.00695933	2.95377	0.364229	1.37522	1.18167	0.00103095	3.71978	4.46399	1.38605	0.0599133	-1.50839	0.800543	0.959341	0.955683	0.851517
		36	1.36881	1.34598	2.8664	3.72183	1.34456	0.006972	2.97095	0.364229	1.38507	1.24889	0.00103095	3.71978	11.5445	1.53118	0.0681412	-1.28433	0.828372	0.957491	0.956488	0.847796
		37	1.37458	1.34031	2.86634	3.72183	1.34836	0.00695901	2.7453	0.366417	1.38507	1.30864	0.00101183	3.72064	11.1052	1.38605	0.0755699	-1.72388	0.817956	0.960184	0.953594	0.847338
		38	1.22716	1.44848	2.90303	3.74801	1.03341	0.00703082	2.16771	0.38571	1.97579	1.15865	0.00114106	4.23825	1.88839	5.15177	0.079969	-1.55884	0.939554	0.955894	0.932325	0.867855
		39	1.27654	1.461	2.96618	3.70529	1.04356	0.00700777	2.20991	0.328602	1.89405	1.18435	0.00100565	3.61992	1.74775	1.88046	0.056296	-1.5869	0.905465	0.960781	0.926981	0.910847
		40	1.25403	1.39465	2.11221	3.65051	0.948341	0.00765	2.75031	0.501444	1.25338	2.74368	0.0062575	2.80544	5.53478	3.99857	0.0700127	-1.3907	0.949403	0.886999	0.959455	0.924102
		41	1.22393	1.47749	2.0469	3.74584	0.747991	0.00817732	2.61039	0.383254	1.15951	2.93589	0.00586641	3.00106	1.00059	1.80677	0.0979593	-1.5594	0.949371	0.910961	0.938515	0.934349
		42	1.22547	1.52695	2.89484	3.60333	0.736339	0.00868305	2.52263	0.578137	1.43308	2.7108	0.00457576	3.00001	1	1.81637	0.0737932	-1.73693	0.94955	0.899057	0.946038	0.932395
		43	1.39307	1.45738	2.95339	3.73948	0.980903	0.00712828	2.94202	0.358793	1.36771	1.08858	0.00131978	1.6968	15.6406	7.37048	0.0683409	-1.45696	0.774166	0.943242	0.961631	0.935403
		44	1.21006	1.45281	2.93303	2.14455	1.053	0.00944496	2.72876	0.366482	1.3764	1.54321	0.00101346	1.88696	15.3653	9.50831	0.0869675	-1.48758	0.934762	0.842153	0.921083	0.940505
		45	1.22657	1.45018	2.91651	3.7241	1.05649	0.00756862	2.99884	0.429167	0.854833	2.41851	0.00479267	2.77786	1.21824	1.79344	0.0599922	-1.22133	0.941075	0.93437	0.962335	0.934923
		46	1.27443	1.46215	2.79228	3.73851	1.04382	0.00703053	2.98187	0.385971	1.98716	0.959222	0.00101061	3.69416	1.5038	1.86051	0.0755897	-1.55921	0.912907	0.960128	0.948652	0.905869
		47	1.3822	1.45001	2.77283	3.70608	1.67308	0.00712641	2.96271	0.329343	1.36966	1.33405	0.00101531	1.64813	7.81654	7.36433	0.07128	-1.11949	0.805349	0.940661	0.942301	0.940144
		48	1.20972	1.45275	2.91514	3.61402	1.06131	0.00809799	2.70066	0.363598	0.99687	2.7096	0.00528954	2.51562	1.12325	7.52981	0.0677289	-1.41	0.950289	0.915904	0.931191	0.924717
		49	1.21114	1.45168	2.96626	3.71009	1.04807	0.00697332	2.41683	0.335221	2.46965	0.9693	0.00100861	4.22749	3.38174	1.85793	0.056177	-1.55779	0.932064	0.960596	0.926529	0.906538
		50	1.24402	1.33841	2.73397	3.74075	1.09794	0.00672432	2.88802	0.385215	2.08243	0.800798	0.001	3.8131	11.6015	1.09913	0.0970074	-1.53126	0.916709	0.956981	0.951016	0.897629
		51	1.37509	1.45997	2.95238	3.73949	0.980903	0.007128	2.94634	0.358793	1.36771	1.39336	0.00132124	1.72562	15.7547	7.2051	0.0968429	-1.12376	0.817159	0.937115	0.96001	0.939157
		52	1.3637	1.46209	2.79856	3.7495	1.65059	0.0069114	2.15956	0.329343	1.36966	1.30575	0.0010084	1.67206	7.80284	7.43017	0.0667214	-1.57939	0.815668	0.941742	0.917305	0.94012
		53	1.68589	1.29126	2.08483	3.66859	0.955357	0.00664794	2.43209	0.619005	0.973187	1.46882	0.00450587	1.18793	18.2278	3.60262	0.0607308	-1.42419	-0.106539	0.936761	0.945007	0.941103
		54	1.22596	1.52674	2.77328	3.71101	1.36587	0.00808911	2.98374	0.443839	0.931049	1.6756	0.0045386	3.04326	1.35472	1.58957	0.0673884	-1.50152	0.934453	0.941935	0.96102	0.931733
		55	1.38229	1.45738	2.95344	2.70051	0.985979	0.00731968	2.95622	0.358232	1.35519	1.74024	0.00131978	1.71467	15.8331	7.32614	0.0723314	-1.45278	0.844201	0.924211	0.937351	0.940168
		56	1.27654	1.46215	2.79228	3.74766	1.04298	0.00702385	2.98187	0.385971	1.99133	0.959222	0.00101062	4.42888	5.54763	1.85898	0.0755828	-1.56969	0.922084	0.960257	0.948703	0.851697
		57	1.20913	1.4623	2.79189	3.74795	1.07109	0.00703043	2.96139	0.40385	1.95742	0.952628	0.00101013	3.64984	5.65217	1.86648	0.0852075	-1.29441	0.930174	0.955002	0.942922	0.920119
		58	1.37187	1.48119	2.95344	2.70051	0.985979	0.00713636	2.7389	0.358625	1.3677	1.39852	0.00131978	1.70902	15.8331	7.32614	0.0723314	-1.45278	0.840552	0.937585	0.918822	0.94016
		59	1.21005	1.64443	2.96499	3.70042	1.05682	0.00879721	3	0.465099	0.846788	2.39329	0.0120315	2.11704	15.2075	4.15967	0.0815857	-1.9036	0.939578	0.952606	0.956869	0.928771
	2	60	1.23107	1.44938	2.54835	3.37466	1.24377	0.00819835	2.92507	0.503395	0.797208	2.52595	0.00762352	2.03489	11.6314	13.2056	0.0976485	-1.94483	0.949495	0.927629	0.960188	0.898435
		61	1.24582	1.54048	2.77268	3.33723	1.62518	0.00884731	2.90635	0.468087	0.520981	2.66327	0.00804596	2.06857	11.731	3.13267	0.0766886	-1.93521	0.925539	0.960107	0.959467	0.940147
		62	1.23107	1.44847	2.54835	3.37466	1.49428	0.00839723	2.70925	0.503395	0.797208	2.52601	0.00759678	2.03476	11.6314	13.2056	0.0976485	-1.94483	0.94931	0.930919	0.957928	0.899866
		63	1.2218	1.42894	2.55833	3.34689	1.58064	0.00858189	2.82751	0.473458	0.747722	2.60064	0.00891549	2.23949	15.6049	2.06931	0.0951686	-2	0.936835	0.955214	0.954911	0.940531
		64	1.21351	1.46107	2.55169	3.54437	1.45945	0.00837904	2.89084	0.469951	0.915233	2.58562	0.00732343	2.45453	11.1637	2.71919	0.0945253	-1.97267	0.945445	0.942624	0.960216	0.937617
		65	1.2351	1.44949	2.66173	3.40788	1.70992	0.00859097	2.90901	0.477983	0.879175	2.53087	0.00744335	2.3477	11.8581	2.5626	0.0991463	-2	0.941043	0.947723	0.958209	0.940071
		66	1.21834	1.47997	2.50284	3.36228	1.6573	0.00860676	2.67457	0.473476	0.848119	2.61456	0.00751631	2.35158	11.3605	3.16765	0.0966598	-1.96513	0.944095	0.947816	0.95691	0.939104
		67	1.24062	1.5437	2.56541	3.3292	1.62518	0.00884856	2.93739	0.419878	0.538635	2.61474	0.00930402	2.06857	11.7536	3.12948	0.0998174	-1.96074	0.923321	0.949954	0.960223	0.941109
		68	1.2222	1.43436	2.47242	2.8352	1.25256	0.00907685	2.71486	0.409252	1.31268	2.62012	0.00704514	2.55476	11.3863	2.75573	0.0729762	-1.9732	0.949378	0.93038	0.938102	0.933999
		69	1.22204	1.46298	2.47242	2.83502	1.25256	0.00907685	2.63244	0.431647	1.50031	2.58774	0.00704718	2.55379	11.1886	2.04686	0.0806532	-1.97303	0.949274	0.928588	0.947929	0.932036
		70	1.23393	1.48325	2.67791	3.34662	1.7463	0.00886507	2.95468	0.415841	1.51941	2.62827	0.00717288	2.673	9.65843	2.69402	0.077667	-1.97285	0.949802	0.920252	0.95618	0.932844
		71	1.21631	1.47406	2.27775	3.40568	1.58298	0.00854484	2.96918	0.457783	0.765645	2.66737	0.00808139	2.64369	11.0502	2.97989	0.0937434	-2	0.944291	0.947336	0.960029	0.934055
		72	1.22696	1.4689	2.50221	3.6376	1.64164	0.00822531	2.93378	0.429171	1.09208	2.57039	0.00720394	2.17172	11.0375	7.50796	0.0998904	-1.75778	0.949813	0.920171	0.960008	0.929343
		73	1.21625	1.54544	2.7675	3.39471	1.56896	0.00879343	2.90071	0.436603	0.821189	2.61696	0.00940601	2.06333	11.5417	3.13756	0.0993894	-1.95804	0.940367	0.957685	0.96002	0.938547
		74	1.222	1.54048	2.77268	3.33723	1.75772	0.00884731	2.90635	0.468087	0.656025	2.66349	0.00804596	2.06008	11.0977	3.13267	0.0866563	-1.93824	0.937509	0.954961	0.958762	0.940109
		75	1.24367	1.49083	2.63424	3.34531	1.36839	0.00842583	2.96617	0.490764	1.19784	2.58955	0.00588943	2.43487	11.5806	3.89565	0.0961933	-1.65274	0.949519	0.909578	0.960199	0.935688
		76	1.18654	1.54544	2.7675	3.39471	1.62518	0.00879843	2.90086	0.419485	0.513425	2.61689	0.00940601	2.56484	11.5417	3.13756	0.0994904	-1.95804	0.935297	0.960198	0.957706	0.930959
		77	1.24109	1.42894	2.54898	3.34689	1.58064	0.00858189	2.82751	0.473458	0.749008	2.60064	0.00891549	2.23949	15.6049	2.0952	0.0951686	-1.96148	0.93175	0.955041	0.955383	0.940965
		78	1.22664	1.4673	2.76971	3.31204	1.6253	0.00879913	2.90086	0.49576	0.820744	2.61689	0.00940601	2.05174	7.64294	7.17431	0.0994904	-1.95804	0.944309	0.952061	0.956286	0.930835
		79	1.22244	1.4271	2.47242	2.8352	1.25256	0.00907685	2.91003	0.473231	1.31268	2.62012	0.00704514	2.55365	11.3775	2.75667	0.0993046	-1.79483	0.949384	0.924739	0.948026	0.935859
	3	80	1.22701	1.05459	1.19919	3.1192	1.42956	0.00871202	2.29306	1.42591	0.70328	2.99089	0.00198062	1.97787	5.00459	7.03721	0.0863576	-0.988865	0.926424	0.912118	0.788369	0.940088
		81	1.29119	1.29137	1.17088	2.81721	1.28284	0.00855412	2.67624	0.585487	0.533555	2.72413	0.00103187	1.50925	7.9506	10.0599	0.1	0.916656	0.906866	0.904787	0.951018	0.940021
		82	1.2453	1.29137	2.045	2.81721	1.11076	0.00855412	2.78891	0.552373	0.533555	2.72413	0.0010289	1.50925	7.9506	10.0354	0.0905811	-0.935835	0.925	0.902814	0.93235	0.940016
		83	1.19734	1.33219	2.22968	3.45572	1.58151	0.00787711	2.75143	0.475277	0.737927	2.98844	0.00759722	2.32384	4.18823	6.36326	0.0972459	-0.788272	0.945463	0.929641	0.95232	0.933775
		84	1.46271	1.31371	1.64604	3.74557	1.07084	0.00727548	2.69612	0.527749	2.9516	0.833575	0.00132765	2.49141	5.47885	5.80004	0.0919417	-1.99681	0.65616	0.957097	0.954587	0.910115
		85	1.42077	1.32124	1.70537	3.21245	1.09982	0.00727984	2.0318	1.20066	2.93612	1.06158	0.0010215	1.56203	16.4916	10.6852	0.0985225	-1.99367	0.762392	0.942432	0.902557	0.940124
		86	1.46309	1.31341	1.61738	3.744	1.46736	0.00733428	2.68678	0.635512	2.33607	0.963403	0.00110023	2.49617	1.57584	5.81336	0.0916154	-1.99175	0.670975	0.956307	0.940236	0.913804
		87	1.2152	1.29776	2.13497	3.61721	1.00581	0.00706503	2.87232	0.308383	2.37079	1.01109	0.00101681	4.34521	1.23331	1.39479	0.0894296	-1.4235	0.929611	0.9578	0.915254	0.901032
		88	1.36833	1.20936	2.01965	3.73421	0.894581	0.00605968	2.93627	0.511386	2.6265	0.906219	0.001	3.56441	5.31302	1.82072	0.0861088	-1.3436	0.818872	0.955635	0.951564	0.892239
		89	1.26607	1.32756	0.780712	2.84762	1.56951	0.00890609	3	0.563755	0.385726	1.42805	0.00130104	1.45043	8.5308	10.0417	0.0969677	-1.23563	0.896065	0.914495	0.955787	0.940375
		90	1.36871	1.29296	2.38098	3.69629	1.54822	0.00728931	2.82146	0.555546	1.34046	0.965724	0.00144158	1.32847	14.4969	10.6923	0.0895384	1.00755	0.798917	0.934424	0.95266	0.94178
		91	1.21026	1.29949	1.96518	3.61128	0.989162	0.00717279	2.14441	0.647651	2.35261	1.02959	0.0010122	3.73697	1.2447	4.14293	0.0912029	-1.35376	0.934835	0.95061	0.948668	0.917382
		92	1.19623	1.34187	2.89189	3.43601	1.55165	0.00843673	2.70528	0.517365	0.780008	2.96949	0.00693375	2.61707	3.21961	3.08226	0.097215	-1.57162	0.945584	0.94026	0.926907	0.93762
		93	1.23559	1.28964	2.05824	2.81014	0.888162	0.0077832	2.2994	0.66168	1.13291	2.76398	0.00580723	2.32548	13.2076	5.3616	0.0937363	-1.23481	0.94949	0.898311	0.950051	0.931291
		94	1.19619	1.41493	2.91225	3.70343	1.00616	0.00863375	2.71343	0.747109	0.789923	2.99867	0.0145283	2.23202	2.44298	5.11797	0.0967773	-1.57346	0.933806	0.951841	0.921307	0.926162
		95	1.46177	1.32525	1.64604	3.74557	1.07108	0.00727708	2.89996	0.618311	2.95491	0.788278	0.00132563	2.47941	5.4366	5.75101	0.0919541	-1.99681	0.667826	0.956101	0.945992	0.910206
		96	1.2055	1.34067	0.833069	3.45561	1.29255	0.00856569	2.98455	0.54881	0.723242	2.98929	0.00672951	2.28071	4.33858	4.62676	0.0980099	-0.690917	0.944625	0.917896	0.957612	0.935556
		97	1.19813	1.25729	2.20622	3.43601	0.944964	0.00799948	2.70488	0.517095	0.648596	2.99662	0.0100846	2.23779	7.99007	3.1081	0.0939687	-1.57162	0.938447	0.946237	0.903334	0.938336
		98	1.21008	1.41803	2.24533	3.62557	1.54133	0.0085191	2.75419	0.478837	1.31421	2.96881	0.0142495	2.26779	5.10954	2.23557	0.0841633	-1.58988	0.940712	0.940802	0.95411	0.93101
		99	1.19681	1.41502	0.844614	3.69477	1.02255	0.00827637	2.75277	0.528822	0.509248	2.96881	0.0145283	2.24607	4.73775	2.23557	0.0967128	-1.58481	0.927614	0.93436	0.960266	0.937706
		100	1.20999	1.29349	2.11127	3.62267	1.00677	0.00717086	2.95296	0.514347	2.0833	0.830281	0.00101418	3.69877	1.84718	5.21935	0.0849321	-1.35113	0.93388	0.950902	0.955652	0.903491
		101	1.19773	1.33254	0.829928	3.64906	1.57649	0.00863375	2.94981	0.620316	0.737927	2.99126	0.00759065	2.31482	4.77906	6.34907	0.0943598	-1.16136	0.944874	0.921787	0.955657	0.931315
		102	1.19734	1.31363	2.22968	3.45326	1.58151	0.00787711	2.75143	0.475277	0.737927	2.98844	0.00759909	2.32384	1.60771	5.82002	0.0916163	-0.788272	0.94509	0.931775	0.948947	0.936721
		103	1.26552	1.28738	2.17527	2.96833	0.893661	0.00812636	2.39887	1.42637	0.477452	2.75729	0.00174503	1.59589	3.38173	8.99071	0.0934245	-1.20934	0.909076	0.921463	0.935524	0.940002
		104	1.43088	1.29672	2.53376	3.66055	0.818604	0.00621213	2.94964	0.407906	1.29056	0.796347	0.00183175	1.15244	3.71053	11.6035	0.0942709	1.37173	0.655818	0.92381	0.956539	0.940136
		105	1.36871	1.26224	2.38098	3.66641	1.54822	0.00728931	2.82146	0.515871	1.34046	0.951857	0.00144158	1.32925	14.4969	10.6923	0.0932282	-1.37694	0.785178	0.935096	0.950265	0.941945
		106	1.20731	1.40837	2.3012	2.83458	1.27712	0.00854484	2.66873	0.47579	0.532551	2.78954	0.00621311	2.44779	3.74563	10.0538	0.0979466	-1.56743	0.944599	0.934614	0.952739	0.910518
		107	1.21004	1.29531	2.12451	3.62409	1.00615	0.00718112	2.95089	0.515318	2.09096	0.837812	0.00101686	3.06414	5.16821	5.21954	0.0847491	-1.34907	0.930582	0.94551	0.955428	0.926876
		108	1.46309	1.33198	1.61738	3.74646	1.46736	0.00733428	2.68678	0.635512	2.33607	0.963403	0.00109835	2.49617	4.15636	6.35661	0.097245	-1.99175	0.685962	0.955686	0.933485	0.909969
		109	1.23483	1.28987	2.05824	2.81014	0.888162	0.0078201	2.29835	0.607936	1.13291	2.76398	0.00580723	2.32548	13.2076	5.3616	0.0937363	-1.23883	0.949473	0.90179	0.948822	0.931755
		110	1.21534	1.31352	2.11617	3.6505	1.27819	0.00746197	2.87369	0.521356	1.95672	0.818362	0.00114415	2.49417	5.73731	5.76535	0.0982154	-1.56576	0.923969	0.941655	0.955215	0.935359
		111	1.28157	1.30604	2.37597	3.5685	1.60985	0.00747776	2.68659	0.43935	0.479679	2.96944	0.00613769	1.58963	12.324	5.67725	0.0950371	-0.590912	0.898564	0.931658	0.949323	0.941192
		112	1.21008	1.41803	2.24533	3.62557	1.54133	0.0085191	2.75419	0.586863	1.31421	2.96881	0.0142495	2.26779	1.78724	2.23557	0.0841345	-1.58988	0.939406	0.941931	0.956849	0.929824
		113	1.20999	1.31153	2.12377	3.62267	1.02026	0.00717157	2.8699	0.520618	2.09408	0.836055	0.00100002	3.5452	2.02785	4.18316	0.0911556	-1.3511	0.931264	0.951078	0.955442	0.915882
		114	1.21241	1.24472	2.15531	3.62878	0.996904	0.0071812	2.96718	0.515487	2.0154	0.966993	0.00101441	4.32214	9.01432	5.21964	0.0850988	-1.3537	0.939931	0.945004	0.945876	0.853518
		115	1.37621	1.21188	2.52688	3.64693	0.963649	0.00602719	2.86553	0.411185	2.35622	0.881912	0.00100003	3.87427	2.90353	1.85539	0.0837261	-0.923619	0.793766	0.961079	0.945683	0.855689
		116	1.22676	1.29509	2.1168	3.62832	1.00615	0.007216	2.9476	0.514597	2.09096	0.871585	0.00105481	4.3237	4.62482	1.52878	0.0847689	-1.35268	0.931371	0.955187	0.955983	0.886576
		117	1.21129	1.29732	2.1229	3.62491	1.02534	0.00719786	2.94209	0.509487	2.07549	0.870046	0.00122401	3.47265	5.03246	5.41857	0.0851409	-1.42016	0.934708	0.94605	0.955221	0.911275
		118	1.21551	1.29228	1.96839	3.62409	1.00616	0.00717637	2.24951	0.613756	2.0981	0.964404	0.0010144	4.35861	2.98395	2.12998	0.0849718	-1.35376	0.933977	0.955557	0.950841	0.889394
		119	1.18352	1.41375	2.27034	3.64907	1.18766	0.00790456	2.95322	0.479977	0.738924	2.78276	0.00760252	2.31167	3.71033	3.24087	0.0979367	-0.565708	0.939312	0.925433	0.960565	0.935631
		120	1.21082	1.3126	2.09224	3.60156	1.12491	0.00811873	2.73434	0.503647	0.783924	2.71782	0.00648429	2.53345	4.35429	10.0623	0.0827739	-1.36672	0.949412	0.917508	0.929403	0.896993
		121	1.37438	1.29562	2.52682	3.64693	0.961723	0.00622013	2.86156	0.32487	2.35622	0.881912	0.00100057	3.87427	3.69147	1.51422	0.0839114	-0.923619	0.796992	0.961752	0.944995	0.858378
		122	1.19681	1.41511	0.844614	3.70795	1.57944	0.00863375	2.75277	0.528647	0.789923	2.96881	0.0145283	2.23202	2.12861	2.23557	0.0858783	-1.58481	0.935015	0.943117	0.958575	0.932474
		123	1.20996	1.29344	1.96839	3.62409	1.02049	0.00717637	2.24312	0.593199	2.08199	0.964592	0.00101437	3.57414	2.43328	5.24936	0.0847866	-1.35376	0.934644	0.950733	0.950334	0.912459
		124	1.45802	1.32525	1.66353	3.74522	1.07108	0.00727708	1.57758	0.618311	2.94506	1.0894	0.00131826	2.47941	5.4366	5.48974	0.0920089	-1.99681	0.656689	0.956084	0.939333	0.921112
		125	1.42077	1.31257	1.70537	3.20913	1.09982	0.00747779	2.0318	0.518503	2.97459	1.06158	0.0010215	1.54003	16.6239	11.4518	0.0984001	-1.9712	0.750404	0.942818	0.941679	0.940065
		126	1.19681	1.41493	2.30091	3.69584	1.57959	0.00852017	2.75277	0.52889	0.789923	2.96881	0.014525	2.23202	2.30161	2.23557	0.096758	-1.58502	0.932464	0.950803	0.953056	0.937882
		127	1.19671	1.29683	2.94562	3.43601	0.990107	0.00802153	2.70488	0.645397	0.648596	2.99662	0.00993966	2.63998	8.20508	4.11836	0.0939687	-1.57162	0.941497	0.945401	0.914213	0.917081
		128	1.22514	1.35909	3	3.61245	1.65321	0.00717237	2.8322	0.3	1.13829	2.93161	0.00703444	2.25412	2.84952	8.26874	0.0842967	-0.798117	0.949322	0.908883	0.919098	0.928649
		129	1.29119	1.3232	1.79919	2.84084	1.26257	0.00859335	2.67641	0.585487	0.551754	2.76891	0.00103183	1.5364	16.4836	10.0617	0.0983728	0.916656	0.911288	0.904706	0.948001	0.94124
		130	1.36871	1.26224	2.38043	3.66641	1.54822	0.0073102	2.82146	0.515871	1.29424	1.02773	0.00144158	1.32925	14.4969	10.6923	0.0934941	-1.37693	0.789154	0.93552	0.949049	0.942056
		131	1.4101	1.30489	1.98643	3.60325	1.29813	0.00648963	2.97006	0.341796	2.02583	0.842026	0.00101049	3.56438	5.01556	2.27726	0.0860402	-1.42026	0.745957	0.962767	0.950212	0.852264
		132	1.19814	1.34715	2.22913	3.75	1.54339	0.00790456	2.69575	0.46101	0.571069	2.78954	0.00622637	2.44779	3.1852	3.38817	0.070389	-1.58882	0.938555	0.940041	0.949302	0.938043
		133	1.45897	1.32699	1.99181	3.722	1.1197	0.00717853	2.78987	0.49007	2.12378	0.744785	0.00107575	1.62164	16.2095	10.1835	0.0994788	-1.97146	0.639924	0.953037	0.95542	0.928729
		134	1.40879	1.29804	1.99261	3.60346	1.29813	0.00647208	2.97006	0.341507	2.01712	0.842026	0.00101353	3.42598	4.80251	2.1072	0.0917345	-1.42026	0.740915	0.961912	0.950393	0.866501
		135	1.20989	1.29741	2.15799	3.62474	1.02026	0.00725885	2.95296	0.305061	2.09408	0.836011	0.00100002	3.56757	1.22526	5.07129	0.0893652	-1.35279	0.92625	0.956139	0.90211	0.905035
		136	1.20067	1.29866	2.13083	3.7394	0.985517	0.00706503	2.83528	0.308383	2.37079	1.01109	0.00101681	4.31301	1.23331	4.0469	0.0871544	-1.41521	0.935801	0.955603	0.906521	0.890909
		137	1.41203	1.29446	2.54116	3.60468	1.14817	0.0059801	2.75117	0.32487	2.00762	1.08404	0.00101083	3.57371	7.91979	1.49867	0.0967718	-0.869843	0.751716	0.960092	0.943732	0.866354
		138	1.21417	1.29239	1.96839	3.62409	1.00615	0.00717621	2.24951	0.524426	2.15474	0.964404	0.0010144	4.25955	2.98395	2.12998	0.0849718	-1.35376	0.933456	0.955938	0.948244	0.895964
		139	1.35554	1.21898	2.64536	3.62006	1.48581	0.0071455	2.70819	0.589196	1.3005	1.03881	0.001	1.35933	14.7793	10.757	0.0841411	-1.58282	0.803454	0.936111	0.942468	0.941056
		140	1.42077	1.31898	1.70537	3.21245	1.09982	0.00727984	2.89813	1.20066	2.93612	0.8414	0.00101691	1.56203	16.4916	10.6852	0.0985225	-1.99367	0.767646	0.94306	0.884197	0.940076
		141	1.23477	1.34181	2.90589	3.63426	0.888162	0.00777507	2.2994	0.523743	1.13291	2.76398	0.00581518	2.62866	13.3851	5.3526	0.0971755	-1.57964	0.949599	0.905347	0.927816	0.921248
		142	1.30598	1.2771	2.03485	3.41553	1.00972	0.00723692	2.886	0.343601	1.98115	0.753965	0.00105941	4.39408	1.03754	1.00124	0.0570617	-1.31176	0.862001	0.962128	0.937926	0.832572
		143	1.19734	1.2959	2.54619	3.44431	1.30184	0.00855412	2.69426	0.321168	0.532338	2.85751	0.00100813	1.50925	10.183	10.4807	0.0996985	-0.717961	0.926942	0.90781	0.801298	0.940627
		144	1.18352	1.41405	2.27034	3.64279	1.18766	0.007841	2.65135	0.480183	0.738924	2.75689	0.00773648	2.31167	3.71033	3.24087	0.0999425	-1.44072	0.939589	0.937166	0.956844	0.935405
		145	1.19672	1.32734	0.829928	3.70777	1.56199	0.00867309	2.93764	0.608406	0.789923	2.95579	0.0142791	2.23202	4.42358	1.66047	0.0972459	-1.59139	0.935007	0.946288	0.95139	0.933496
		146	1.30598	1.27749	2.03289	3.4176	0.633249	0.00651494	2.60907	0.339991	2.08729	0.753965	0.00110503	4.46871	4.35994	1.00124	0.0588111	-1.4338	0.866796	0.960566	0.9345	0.823532
		147	1.21528	1.31364	2.11764	3.7426	0.995293	0.00721176	2.87037	0.515763	2.09692	0.855413	0.00100021	4.38229	5.74249	6.23545	0.0846291	-1.56888	0.93918	0.949255	0.956315	0.834352
		148	1.37621	1.21188	2.54485	3.64693	1.011	0.00602719	2.86929	0.520784	2.35622	0.856439	0.00100003	3.92797	1.27118	1.85539	0.0837261	-0.923619	0.799773	0.960352	0.94976	0.852535
		149	1.17916	1.31053	2.15433	3.6924	1.05991	0.00789013	2.70077	0.301483	0.763702	2.99529	0.00739764	3.51988	13.6405	1.07601	0.001	-1.56677	0.941699	0.948493	0.852877	0.931085
	4	150	1.16979	1.52721	1.77641	3.73685	1.77322	0.00875333	2.83101	0.458062	1.48221	0.422804	0.00102921	3.79605	9.98346	5.89298	0.0971094	1.91944	0.923972	0.965129	0.958685	0.835952
		151	1.20186	1.53005	1.7762	3.74657	1.78591	0.00870186	2.78772	0.399575	1.48177	0.411664	0.00100964	3.85735	4.67054	8.36784	0.0707156	1.91987	0.929106	0.966201	0.955444	0.78145
		152	1.42947	1.34743	2.78724	1.18768	0.678792	0.00942369	2.96703	2.81076	0.67796	0.728602	0.00797332	1.11203	10.518	7.40486	0.0955494	-1.64357	0.5444	0.895631	0.892828	0.945193
		153	1.20734	1.57654	2.79649	3.49981	1.83855	0.00880848	2.75009	0.429239	0.650297	3	0.0100152	1.86844	13.2623	8.52102	0.0959913	-2	0.94434	0.958176	0.957328	0.927502
		154	1.22209	1.49245	2.80024	3.41121	1.76069	0.00874556	2.25899	0.462217	0.822071	2.97891	0.00633477	2.17355	15.6058	3.61798	0.0997985	-1.6939	0.945343	0.949334	0.948514	0.940129
		155	1.16983	1.41623	2.85206	3.51107	1.78454	0.00874798	2.65338	0.406959	1.46832	0.448364	0.00111769	3.95932	13.6932	12.5439	0.0718737	1.91844	0.935472	0.965522	0.920574	0.701693
		156	1.23387	1.53682	2.86584	3.44517	1.76854	0.00874892	2.96431	0.457799	0.801472	2.98396	0.00697171	2.42952	14.3213	6.00546	0.0864976	-1.90758	0.94964	0.934257	0.960209	0.92171
		157	1.22227	1.41947	2.80024	3.41126	1.77079	0.00874726	2.26394	0.469622	0.822071	2.9825	0.00688924	2.17257	15.6058	3.74885	0.0997848	-1.9062	0.944186	0.951489	0.936382	0.940364
		158	1.22285	1.54088	2.72837	3.51264	1.80313	0.00882237	2.94574	0.457605	0.790946	2.99997	0.0109258	2.42638	13.5298	1.75976	0.086453	-1.95072	0.940054	0.96001	0.960584	0.938679
		159	1.2034	1.54055	2.76879	3.67507	1.84829	0.00877379	2.30147	0.471734	0.758544	2.97738	0.00691567	1.99618	15.7299	4.31169	0.0970247	-1.97143	0.944156	0.955011	0.950821	0.938094
		160	1.22036	1.54303	2.86567	3.44169	1.72166	0.00875708	2.96916	0.455077	0.624241	2.99553	0.00691817	1.95868	15.7402	4.12534	0.0961781	-1.91689	0.940508	0.951215	0.960245	0.940587
		161	1.20233	1.53005	1.7762	3.73257	1.77322	0.00875223	2.8306	0.456285	1.48221	0.422203	0.00102931	3.79454	4.81029	5.92578	0.0966449	1.91987	0.925142	0.966277	0.960006	0.820735
		162	1.22691	1.60181	2.95105	3.40527	1.75537	0.00873671	2.64989	0.408951	0.820559	2.93545	0.00347258	2.18147	15.9178	4.89954	0.1	-1.851	0.945713	0.931692	0.951976	0.940171
		163	1.223	1.62941	2.37529	3.73958	1.14189	0.00880623	2.77459	0.408404	0.893154	2.98716	0.00677515	2.21373	15.7389	4.17914	0.0957248	-1.97065	0.949531	0.938635	0.956388	0.935478
		164	1.20558	1.53524	2.73297	3.49952	1.79249	0.00870733	2.94217	0.457155	0.676124	2.86509	0.0104495	1.96221	15.068	8.18892	0.0888929	-1.92779	0.944505	0.952841	0.960833	0.922522
		165	1.22209	1.54113	2.79877	3.40615	1.83558	0.00880308	2.94312	0.455129	0.790191	2.98169	0.011182	2.36811	16.3737	1.6993	0.0996691	-1.95179	0.939122	0.959086	0.959554	0.940425
		166	1.22269	1.53561	2.9701	3.51775	1.80287	0.00875045	2.74305	0.447705	0.796733	2.93967	0.00826571	1.98889	1.39305	13.695	0.0893983	-1.9691	0.949961	0.942131	0.957627	0.908725
		167	1.21289	1.54074	2.74403	3.51775	1.81214	0.00881056	2.74453	0.458194	0.79687	2.97915	0.00826571	1.99194	1.30321	6.10409	0.0961481	-1.95686	0.945238	0.95396	0.95859	0.93758
		168	1.20345	1.54225	2.71917	3.51076	1.807	0.00869273	2.96431	0.457605	0.680764	2.99127	0.0109569	2.42695	13.5298	1.5737	0.0975916	-1.96038	0.937455	0.960251	0.960367	0.940191
		169	1.23323	1.54213	2.71942	3.51292	1.77172	0.00880971	2.94372	0.466176	0.686081	2.92512	0.00689827	2.43997	14.3213	4.13124	0.0856523	-1.63073	0.945368	0.946102	0.960347	0.930379
		170	1.22399	1.53561	2.76039	3.52484	1.80338	0.00881025	2.33079	0.447705	0.795003	2.94005	0.00826571	1.99194	1.2668	13.6731	0.0865727	-1.96879	0.949744	0.948077	0.950039	0.906376
		171	1.22209	1.53905	2.7921	3.51409	1.72597	0.00874556	2.94743	0.462217	0.891759	2.98112	0.00633477	2.17567	14.5154	6.08644	0.0997985	-1.96335	0.949938	0.92856	0.960736	0.934544
		172	1.23466	1.54184	2.71053	3.51288	1.76928	0.0088082	2.9421	0.466754	0.801153	2.92512	0.00698803	1.99193	1.88885	6.00897	0.086769	-1.95063	0.945608	0.943909	0.960382	0.937782
		173	1.22209	1.49414	2.77662	3.40661	1.72616	0.00874556	2.25883	0.462164	0.904332	2.92725	0.00633477	2.17567	2.08558	7.6389	0.0997985	-1.96358	0.949328	0.943006	0.948139	0.935325
		174	1.22114	1.54128	2.81257	3.44202	1.1704	0.00875703	2.76383	0.453557	0.659203	2.98997	0.0069191	1.85368	8.94397	12.5777	0.09733	-1.96945	0.949213	0.940132	0.953956	0.911042
		175	1.20261	1.52723	1.7762	3.73685	1.77739	0.00875341	2.83101	0.464955	1.48221	0.422804	0.00102921	4.03058	9.53765	8.47112	0.0979562	1.91987	0.930448	0.966019	0.96028	0.747814
		176	1.45323	1.34743	2.78724	1.18768	0.678792	0.00942369	2.67308	1.67353	0.784486	0.728602	0.00797332	1.00604	14.685	7.40411	0.0968199	-1.64357	0.498856	0.892213	0.904912	0.945286
		177	1.22216	1.53731	2.95092	3.40356	1.77113	0.00873531	2.26696	0.414282	0.823983	2.98344	0.00705687	1.9952	15.4177	8.84006	0.0983693	-1.99916	0.949667	0.948313	0.945135	0.927273
		178	1.17077	1.38325	1.7762	3.74794	1.77659	0.00874923	2.78772	0.454762	1.93299	0.411664	0.00102921	3.8647	4.89925	8.45374	0.0997772	1.91987	0.929434	0.965672	0.935309	0.809419
	5	179	1.19392	1.47364	2.28961	3.51535	1.66303	0.00858526	2.77391	0.408224	0.689393	2.45718	0.00867322	2.25874	12.2313	3.26347	0.099624	-1.96673	0.938885	0.955353	0.951898	0.940192
		180	1.22354	1.46088	2.22162	3.5093	1.64224	0.00859926	2.9362	0.510668	0.937125	2.46797	0.00665044	1.85343	18.917	9.81852	0.0974111	-1.9598	0.94934	0.928134	0.960058	0.926878
		181	1.22396	1.47242	2.2345	3.50411	1.64307	0.00907935	2.91489	0.509334	0.941425	2.46352	0.00561361	1.85851	11.4561	9.92428	0.0991096	-1.97928	0.949626	0.922669	0.951383	0.930704
		182	1.21886	1.47352	2.27779	3.41387	1.66303	0.00859997	2.76073	0.429421	0.750849	2.46172	0.00885327	2.04124	12.2416	7.83884	0.0977527	-1.94308	0.944496	0.950684	0.955922	0.928833
		183	1.20596	1.45993	2.98902	3.48478	1.91198	0.00858637	2.91111	0.513885	0.757225	2.45146	0.011638	2.57592	18.6719	1.10254	0.0997471	-1.98071	0.933838	0.960974	0.958238	0.938856
		184	1.19578	1.47355	2.75434	3.51717	1.66658	0.00879266	2.54381	0.408915	1.05198	2.3941	0.00867383	2.60095	11.7737	2.48924	0.0998795	-1.9972	0.944111	0.955327	0.938942	0.936613
		185	1.21726	1.45893	2.99264	3.51601	1.59208	0.00858538	2.76727	0.401233	0.936728	2.33704	0.00651608	2.59351	19.6403	7.74014	0.0845977	-1.94718	0.949333	0.935573	0.940889	0.899057
		186	1.21819	1.3082	2.28432	3.31036	1.89851	0.0091025	2.91731	0.500515	1.58081	2.39513	0.00664407	2.56674	19.3625	3.34984	0.0978854	-1.94013	0.949441	0.917796	0.900318	0.935325
		187	1.21714	1.45897	2.2206	3.51652	1.59356	0.00858274	2.96921	0.512842	0.936728	2.33665	0.00654328	2.59975	19.1865	1.83461	0.0849	-1.94769	0.944143	0.942047	0.960198	0.93786
		188	1.21499	1.45797	2.22301	3.46387	1.66396	0.00859181	2.79858	0.448242	0.917441	2.39547	0.00734385	2.24667	19.174	3.25508	0.0973634	-1.94716	0.944045	0.947908	0.95776	0.938811
		189	1.19578	1.45591	2.75434	3.46647	1.71256	0.00880026	2.88333	0.438818	1.05198	2.4691	0.00874487	2.59941	11.801	2.18889	0.0999351	-1.96782	0.944343	0.953499	0.947992	0.937627
		190	1.19392	1.47364	2.96867	3.51504	1.90042	0.00858538	2.77391	0.399356	0.689393	2.45853	0.00874359	2.26597	12.2416	7.91943	0.099603	-1.96673	0.944212	0.95687	0.946367	0.919249
		191	1.20864	1.46434	2.9896	3.50494	1.92682	0.00859985	2.91074	0.513916	0.8574	2.44164	0.00868809	2.57581	19.1953	1.10142	0.0995884	-1.97097	0.939843	0.956635	0.958379	0.939526
		192	1.22229	1.45912	2.92315	3.50653	1.89716	0.00860805	2.92547	0.501392	0.939758	2.45135	0.00669873	1.88853	19.4431	9.9129	0.0994216	-1.94596	0.949271	0.933152	0.95792	0.927166
		193	1.20701	1.46421	2.22006	3.51696	1.66273	0.00860072	2.93963	0.510481	0.68113	2.46107	0.00872462	2.25296	18.8091	3.26823	0.0974111	-1.96087	0.939766	0.952738	0.960048	0.938973
		194	1.20715	1.46447	2.26069	3.64421	1.73024	0.00859843	2.92297	0.511221	0.465838	2.45745	0.00873238	1.78306	19.2172	3.62189	0.0997446	-1.95989	0.926236	0.946112	0.960395	0.940121
		195	1.19392	1.47451	2.2937	3.50297	1.66305	0.00859989	2.9207	0.395381	0.782195	2.46172	0.00859661	2.04124	12.2482	7.77598	0.0995531	-1.9679	0.944611	0.950166	0.951376	0.931382
		196	1.2254	1.46727	2.44499	3.50332	1.74519	0.00859295	2.96341	0.531561	0.687531	2.39106	0.00879961	2.29585	19.3623	1.8734	0.0965209	-1.95961	0.934717	0.956017	0.958498	0.940649
		197	1.20746	1.47608	2.29151	3.64708	1.63962	0.00858124	2.9179	0.500138	0.684305	2.41423	0.00873068	2.62067	12.2997	1.82884	0.0997411	-1.96882	0.937955	0.955096	0.961074	0.936823
		198	1.20715	1.46113	2.27627	3.57652	1.64306	0.00859932	2.92065	0.50081	0.866037	2.39527	0.00868925	2.57163	19.3453	3.60649	0.0990372	-1.95989	0.944062	0.945454	0.960298	0.930348
		199	1.20809	1.4581	2.22301	3.4593	1.66345	0.00858539	2.79858	0.448242	0.757344	2.29533	0.00734385	2.23428	19.1735	3.25508	0.0973629	-1.95439	0.940574	0.951788	0.957589	0.940072
	6	200	1.35518	1.39853	1.81126	3.28223	0.669605	0.0071907	2.65442	0.418222	2.46227	0.972345	0.00100912	2.53849	3.14209	8.07082	0.0987526	-1.94409	0.855819	0.95519	0.946614	0.925536
		201	1.38723	1.39851	1.75678	3.2833	0.669326	0.00721326	2.25523	0.419404	2.50633	0.884581	0.00117784	2.17552	3.51907	8.16124	0.0992041	-1.8428	0.789402	0.955664	0.940873	0.931084
		202	1.38723	1.39851	1.75678	3.27947	0.670386	0.00721326	2.25523	0.4169	2.50633	0.949885	0.00101163	3.03984	12.7968	3.19588	0.0992041	-1.8428	0.799581	0.960005	0.940089	0.904577
		203	1.19855	1.2197	2.50921	3.13059	1.09472	0.00723495	2.04739	0.505084	2.38609	1.15252	0.00100487	4.52964	1.02579	4.16904	0.0832063	-1.40046	0.939589	0.951531	0.924538	0.887499
		204	1.22471	1.37277	2.43094	3.33405	0.987616	0.00725151	1.87331	0.616574	2.19938	1.0558	0.00102349	3.8506	3.38219	3.18623	0.0827092	-1.45338	0.933593	0.955122	0.928034	0.910446
		205	1.22706	1.38898	2.53619	3.25505	0.643747	0.00727625	2.69111	0.5152	1.56081	1.04332	0.00101055	2.58098	1.96644	7.98669	0.0996663	-1.73993	0.931792	0.946064	0.956773	0.931031
		206	1.25672	1.25361	2.456	3.04376	1.0661	0.00723298	2.41646	0.632069	1.98235	0.928034	0.00105893	3.86138	1.32357	2.88866	0.0981347	-1.38866	0.917528	0.955389	0.950215	0.893291
		207	1.25853	1.42287	2.43296	3.28218	0.521079	0.00721376	2.6862	0.503957	2.02841	0.972447	0.00106293	2.98723	6.3373	3.88076	0.09855	-1.92622	0.923661	0.951221	0.955085	0.926295
		208	1.22208	1.40302	2.597	3.29821	0.98332	0.00810818	2.67894	0.473491	0.953839	2.68728	0.00810845	1.98259	15.6447	3.41052	0.099519	-1.84005	0.944185	0.938738	0.951559	0.93467
		209	1.38723	1.39251	2.22133	3.27947	0.670386	0.00721326	2.25523	0.416795	1.50756	1.06032	0.00101163	3.03984	12.7968	3.1818	0.0992041	-1.93031	0.781797	0.960303	0.95065	0.878554
		210	1.24252	1.37628	2.92197	3.57756	1.09504	0.00749549	2.85236	0.49266	2.27104	1.05014	0.00152686	4.80672	1.36169	3.32269	0.0429116	-1.4822	0.939522	0.942079	0.960553	0.850628
		211	1.40204	1.3894	2.40094	3.29636	1.12613	0.00713428	2.42983	0.41899	2.46507	0.981516	0.0010025	2.91023	2.86662	4.32702	0.0999452	-1.65774	0.783233	0.961016	0.933375	0.908942
		212	1.2122	1.40865	1.83401	3.689	1.09555	0.00804128	2.89075	0.506368	1.54731	0.962188	0.00763985	2.52118	3.33771	3.85742	0.0893922	-1.92529	0.927383	0.941781	0.960422	0.936016
		213	1.2289	1.35571	2.3053	3.74685	0.930852	0.00726203	2.60681	0.53047	2.03674	1.05846	0.00100807	3.9427	16.7887	3.43352	0.0988944	-1.58836	0.938329	0.950921	0.956735	0.888715
		214	1.22046	1.37563	2.96718	3.58535	1.26807	0.00720946	2.83854	0.503369	2.06676	0.566519	0.00100549	4.72984	1.02285	3.31799	0.0425344	-1.4822	0.929005	0.960328	0.951458	0.817005
		215	1.22249	1.40302	2.46139	3.29817	0.98332	0.00800257	2.67894	0.503351	0.953839	2.70943	0.00810845	1.98259	15.6447	3.41052	0.099519	-1.84005	0.944841	0.933153	0.956901	0.932619
		216	1.40281	1.51195	2.37346	2.93162	0.511917	0.00672507	2.42485	0.427603	2.5444	1.04118	0.00100994	2.90575	1.44683	3.4739	0.0999085	-1.78324	0.807824	0.960299	0.879622	0.918481
		217	1.18724	1.25815	2.7781	3.71833	1.41719	0.00813043	2.8101	0.522192	0.746062	2.74	0.0082368	2.17107	18.3246	4.63137	0.0841019	-1.73026	0.945331	0.942189	0.876955	0.934225
		218	1.38723	1.39851	1.75678	3.27947	0.948052	0.00723976	2.25523	0.4169	2.51377	0.949885	0.00101163	3.03984	15.782	3.19588	0.0992041	-1.8428	0.806941	0.960703	0.926918	0.904616
		219	1.20973	1.38092	2.93935	3.33602	1.47879	0.00836899	2.72198	0.51671	0.583406	2.64522	0.00610332	2.37242	16.6431	4.92458	0.0999659	-1.60368	0.941716	0.945478	0.944268	0.930498
		220	1.2218	1.41365	2.19418	3.04879	0.975285	0.00841141	2.83281	0.429197	0.964049	2.88849	0.00765176	1.95779	3.27565	7.25541	0.0987219	-1.82703	0.949276	0.924549	0.951919	0.933096
		221	1.21347	1.36581	1.18366	3.70929	0.678525	0.00721397	2.63111	0.4529	2.95776	0.928854	0.00100008	4.59822	1.16803	1.15029	0.0991394	-1.61701	0.93441	0.956261	0.949517	0.904944
		222	1.35518	1.39902	1.81126	3.30143	0.669605	0.00722332	2.65011	0.418222	2.05876	0.968802	0.00100877	2.53482	4.34104	8.07602	0.0987526	-1.94409	0.849159	0.956172	0.950887	0.918046
		223	1.19887	1.40302	2.44912	3.28473	0.657008	0.00722898	2.05428	0.504533	2.46227	0.972332	0.00100912	3.2833	1.05014	8.07082	0.0974869	-1.47298	0.935894	0.950238	0.940055	0.921338
		224	1.32889	1.42057	2.46105	3.22231	0.568636	0.00721504	2.6535	0.426168	1.56667	0.949923	0.00117762	2.53849	2.04109	8.36522	0.0997156	-1.87089	0.866425	0.955029	0.956767	0.910876
		225	1.22028	1.28169	2.06647	2.91005	0.523403	0.00720102	2.45118	0.52694	2.49612	1.01282	0.00102862	4.44586	17.0054	3.19158	0.098603	-1.59922	0.939394	0.950146	0.947714	0.874599
		226	1.20228	1.40063	2.21563	3.65137	1.05782	0.00808158	2.93214	0.629235	0.979716	1.86187	0.00786534	2.52312	3.0878	3.24561	0.0997693	-1.73393	0.938625	0.93945	0.956013	0.936311
		227	1.21806	1.28509	2.43334	3.57646	0.964419	0.00668088	1.91794	0.456614	2.16956	1.15817	0.00106401	3.92066	2.62535	7.60311	0.0991743	-1.94283	0.940123	0.95285	0.929001	0.883569
		228	1.2289	1.35571	2.3053	3.7477	0.930852	0.00726119	2.60681	0.53047	2.03674	1.05846	0.00100759	4.62501	12.2949	2.97417	0.0988944	-1.58587	0.939531	0.950039	0.956705	0.845729
		229	1.21421	1.3757	2.49948	3.59555	0.975795	0.00746647	2.23171	0.493252	1.5652	1.04362	0.00117949	3.02529	16.7679	3.06854	0.0991179	-1.85954	0.929423	0.950117	0.949314	0.926236
		230	1.22719	1.38961	2.53719	3.28289	0.643747	0.00727481	2.70744	0.5152	1.45616	1.04332	0.00101054	2.58098	12.4047	8.08221	0.0998951	-1.84386	0.934718	0.946692	0.957159	0.92292
		231	1.24264	1.37619	2.92197	3.60082	1.09504	0.00749549	2.83854	0.493315	2.2148	0.925263	0.00100549	4.82194	1.37581	3.32269	0.0391093	-1.48219	0.936034	0.948701	0.960295	0.836221
		232	1.24264	1.37521	2.92197	3.57917	1.07355	0.00749549	2.83854	0.493315	2.21828	0.580205	0.00100902	4.75584	1.31325	3.39174	0.0381599	-1.4822	0.923792	0.959706	0.960106	0.791258
		233	1.21574	1.36767	2.51006	3.73069	0.945211	0.00723053	2.75118	0.453855	2.03176	1.05847	0.00103	2.52973	1.22526	8.08129	0.083168	-1.48621	0.932419	0.940878	0.955825	0.9356
		234	1.23219	1.37427	2.39478	3.63673	1.0813	0.00722428	2.68936	0.490258	2.25158	1.04796	0.00101823	3.04517	17.8069	8.28578	0.0999621	-1.71987	0.939561	0.946483	0.952494	0.916455
		235	1.18999	1.40845	1.83401	3.60344	1.08469	0.00800827	2.88285	0.520439	1.46115	0.788249	0.00106523	3.93621	2.55164	4.60505	0.0994537	-1.98499	0.93224	0.955842	0.959733	0.877005
		236	1.21413	1.39103	2.23296	3.57902	0.96851	0.00713663	2.75485	0.454046	2.03164	1.07098	0.00111269	2.92623	1.12181	8.12424	0.0985646	-1.58456	0.935429	0.945046	0.947506	0.93055
		237	1.35752	1.39853	1.81126	3.25833	0.669605	0.0071906	2.65442	0.418222	2.46227	0.972345	0.00100912	2.19759	17.2187	8.07224	0.0986974	-1.94409	0.853195	0.952377	0.946469	0.932649
		238	1.22857	1.44477	2.22133	3.21675	0.979596	0.00797939	2.66087	0.417218	1.53113	1.04242	0.00101286	2.99178	1.11311	8.31287	0.0987136	-1.89101	0.933842	0.950129	0.951216	0.915006
		239	1.25458	1.43477	2.45405	3.23452	1.16329	0.0075141	2.25458	0.368198	2.0731	1.08129	0.00100454	3.82916	1.22265	4.44326	0.0999453	-1.67105	0.926904	0.960857	0.92633	0.895637
		240	1.23081	1.35571	2.5385	3.32711	0.985509	0.0072506	1.86127	0.606163	2.06017	1.06485	0.00101243	2.36156	16.2949	8.09276	0.0990188	-1.59609	0.929932	0.945579	0.934954	0.935587
		241	1.19055	1.3842	2.77997	3.68895	1.41719	0.00812802	2.03359	0.506971	0.843221	2.74001	0.00788252	2.94882	12.5141	2.86752	0.0842006	-1.73444	0.944621	0.940959	0.930979	0.918968
		242	1.38722	1.39833	1.84196	3.2833	0.729029	0.00721327	2.25467	0.420252	2.50633	0.884581	0.00112617	2.17552	3.51907	8.16124	0.0992041	-1.8428	0.791136	0.955727	0.938605	0.930939
		243	1.25625	1.42301	2.48845	3.26894	1.37922	0.00840639	2.71591	0.506349	0.595316	2.72145	0.0080935	1.97508	15.4086	4.5882	0.0981033	-1.82969	0.926669	0.949728	0.95659	0.940022
		244	1.20543	1.45459	2.9255	3.28989	1.38117	0.00841234	2.71599	0.494288	0.857163	2.75622	0.00737511	2.20982	3.47717	7.94675	0.0977956	-1.83971	0.947831	0.936382	0.956562	0.929895
		245	1.23219	1.37516	2.38382	3.63673	1.0813	0.00722428	2.8342	0.490258	2.25158	1.04796	0.00101823	3.05812	1.45232	8.0178	0.0999621	-1.71987	0.936691	0.946875	0.953506	0.926237
		246	1.19122	1.42313	2.86894	3.35826	1.62964	0.00830234	1.93955	0.515808	0.643302	2.75282	0.00572036	2.04762	19.4554	4.77581	0.1	-1.65089	0.939444	0.926928	0.939445	0.94024
		247	1.21129	1.3761	2.50161	3.59555	0.975795	0.00746265	2.68264	0.493252	1.55306	1.04322	0.00123052	3.02529	16.7679	8.09016	0.0997145	-1.92137	0.939237	0.947	0.95692	0.903284
		248	1.21309	1.4054	1.83401	3.60348	1.09555	0.00802233	2.90209	0.506368	2.04967	1.07227	0.00103151	2.52459	3.33771	8.15904	0.0994567	-1.92015	0.934757	0.93052	0.960192	0.936003
		249	1.22208	1.40302	1.82839	3.59927	1.08373	0.00810314	2.86754	0.520487	0.938392	2.68728	0.00811188	1.98259	1.68951	4.68129	0.0995215	-1.6423	0.944931	0.929869	0.960061	0.930417
		250	1.19055	1.25821	2.7781	3.71825	1.41719	0.00812802	2.05239	0.522736	0.843497	2.74001	0.0082368	2.17173	12.5141	2.86668	0.0841983	-1.72983	0.941458	0.945257	0.863173	0.937847
		251	1.22716	1.38921	1.75115	3.5811	0.64314	0.00743948	2.88551	0.514659	2.20967	0.935748	0.00121153	2.56643	16.7745	8.11018	0.0991149	-1.62722	0.935857	0.935263	0.960183	0.9311
		252	1.22782	1.39203	1.76499	3.73629	1.31975	0.00835261	2.71668	0.575361	1.21309	2.8096	0.00710839	2.20165	16.7828	3.58706	0.0994742	-1.96045	0.949606	0.914562	0.955617	0.930392
		253	1.35865	1.39909	2.41357	3.2678	0.935244	0.00724002	2.60493	0.418222	1.53375	0.971543	0.00104523	3.05043	2.30993	4.03238	0.0986997	-1.70701	0.828107	0.961885	0.946032	0.893874
		254	1.19046	1.40865	1.83401	3.65111	1.09555	0.00804128	2.89075	0.506368	1.54731	0.962188	0.00763985	2.52118	3.33771	3.82314	0.0895699	-1.92637	0.928782	0.936579	0.960546	0.935271
		255	1.20573	1.44705	2.27073	3.73027	0.720597	0.00794421	2.68231	0.499476	0.854872	1.89903	0.00801362	2.13354	1.68444	6.95355	0.0997593	-1.84741	0.940379	0.941794	0.955827	0.932783
		256	1.19094	1.4077	2.74402	3.61169	1.05782	0.00808088	2.93061	0.50497	0.959825	1.94305	0.00786867	2.52121	3.3429	3.24561	0.0898336	-1.94409	0.9399	0.944197	0.951805	0.936301
		257	1.40243	1.39087	2.39721	3.30692	1.04137	0.00721806	2.42852	0.419593	2.50673	0.981516	0.00101323	2.91023	3.47589	3.66492	0.0999608	-1.71871	0.778453	0.960344	0.936326	0.911418
		258	1.40476	1.37678	2.4319	3.5745	1.06854	0.00706221	2.67618	0.417801	2.13586	1.05595	0.00100388	2.11943	3.52089	7.38879	0.0952627	-1.74596	0.773118	0.95211	0.951035	0.931717
		259	1.2122	1.40897	1.83401	3.689	1.09555	0.00809112	2.89075	0.505225	1.54731	0.962188	0.00763985	2.52118	3.33771	8.05291	0.0893922	-1.93009	0.93482	0.943315	0.960325	0.919943
		260	1.34503	1.42057	2.39403	3.23907	0.982306	0.00724476	2.27672	0.428402	1.56332	1.05177	0.00100355	3.26531	17.1607	4.67296	0.0999535	-1.58463	0.863894	0.960695	0.93151	0.864592
		261	1.20991	1.45441	2.9255	3.2957	1.38117	0.00812853	2.67694	0.492972	0.857163	2.7148	0.00737511	2.20993	18.7561	5.0338	0.0977956	-1.86575	0.946105	0.932526	0.954898	0.935528
		262	1.18959	1.4198	1.87128	3.60687	1.03505	0.00810516	2.88887	0.520281	1.39293	1.04096	0.00116207	2.48078	17.8461	7.13604	0.0999563	-1.94197	0.933398	0.941743	0.960363	0.93364
		263	1.21539	1.37386	2.53984	3.33547	0.94585	0.00725151	1.87622	0.423416	2.19537	1.13596	0.0010119	3.81521	16.1229	3.14103	0.0827092	-1.66386	0.936622	0.956789	0.924017	0.908106
		264	1.18724	1.25815	2.7781	3.71502	1.41719	0.00813043	2.67066	0.52017	0.746062	2.74	0.0082368	2.17107	18.3246	4.63137	0.0999222	-1.73026	0.944509	0.944463	0.874266	0.936556
		265	1.24264	1.37521	2.92099	3.57917	1.06265	0.00749549	2.83854	0.493315	2.2212	0.575599	0.00100903	4.76424	1.31086	3.39174	0.0381599	-1.4822	0.923656	0.960056	0.959966	0.789412
		266	1.25947	1.4208	1.83401	3.689	1.09555	0.00804566	2.88832	0.506384	1.39338	0.949407	0.00792124	2.52167	3.33771	3.73548	0.0893481	-1.9367	0.908154	0.945186	0.960547	0.933646
		267	1.21796	1.2851	2.47021	3.57643	1.07331	0.00668338	2.24814	0.458391	2.06787	1.06359	0.00100867	3.92677	1.32485	8.07705	0.099145	-1.74594	0.939473	0.952056	0.94051	0.876944
		268	1.38662	1.45118	1.72837	3.23602	0.664524	0.00725481	2.23001	0.495688	2.45505	0.949885	0.00117159	3.03351	5.77667	3.20773	0.0992041	-1.80533	0.816736	0.960794	0.91034	0.911074
		269	1.34804	1.36224	2.2376	3.32618	0.993288	0.00724476	2.30939	0.385212	2.02673	1.05602	0.00100355	3.26531	17.1808	4.63015	0.0985738	-1.67228	0.855121	0.961274	0.941716	0.880701
		270	1.20973	1.38403	2.93935	3.33544	1.47794	0.00836899	2.72198	0.51671	0.781841	2.62521	0.00616812	2.41975	3.94969	4.92458	0.0995769	-1.60368	0.945458	0.936668	0.945721	0.936392
		271	1.35865	1.39909	2.48089	3.2678	0.930324	0.00724002	2.60513	0.417126	1.53297	0.971543	0.00104523	3.05043	16.2106	3.69335	0.0986908	-1.59166	0.833767	0.962192	0.947896	0.883124
		272	1.2282	1.36087	2.23681	3.58669	1.06852	0.00730736	2.40567	0.400363	2.22693	0.932709	0.00105695	2.53637	12.195	8.10965	0.0999321	-1.58891	0.928222	0.950425	0.940841	0.933041
		273	1.23322	1.38939	2.41272	3.58516	1.02503	0.0072095	2.60661	0.500067	1.51688	1.04901	0.00100798	3.86973	1.99867	4.03243	0.0989062	-1.70372	0.934455	0.957108	0.950256	0.884587
		274	1.35413	1.45507	1.81126	3.21885	0.669605	0.0071965	2.65442	0.402513	2.4804	0.97609	0.00100912	2.53849	3.14209	8.07082	0.0990342	-1.92803	0.864287	0.955441	0.927578	0.926627
		275	1.22208	1.40319	1.80762	3.59927	1.47562	0.00811131	2.86754	0.520487	0.938392	2.68728	0.00808208	2.41395	1.43178	4.68129	0.0995217	-1.63956	0.946274	0.927688	0.956392	0.935776
		276	1.25446	1.41368	1.87654	3.26894	1.3796	0.00842346	2.06933	0.506349	0.667439	2.88661	0.00638679	1.99808	19.3544	4.59606	0.0973853	-1.83731	0.933652	0.942993	0.945568	0.940464
	7	277	1.21044	1.63447	2.47385	2.48465	1.30411	0.00989926	2.99999	0.447618	0.752701	0.3	0.00429158	3.11191	1.26528	19.297	0.0999376	1.99997	0.927237	0.965253	0.956381	0.740578
		278	1.19447	1.43864	1.72314	2.43454	0.788064	0.00972427	2.08423	0.410145	0.732161	2.89212	0.00496228	2.29678	18.8991	7.11701	0.0995094	-1.99993	0.94922	0.941483	0.887528	0.92888
		279	1.23099	1.47391	2.16901	3.60097	1.2946	0.00846771	2.94208	0.477972	0.601944	2.88794	0.00668419	2.21532	16.7239	2.24109	0.0904827	-1.99781	0.937104	0.949319	0.961032	0.940098
		280	1.21772	1.64999	2.2325	2.54249	0.797743	0.00981863	2.97428	0.41054	0.739757	2.9813	0.00669014	2.23401	9.5832	7.59907	0.0994096	-1.94339	0.949472	0.935687	0.956185	0.925548
		281	1.19704	1.63179	2.86696	3.23107	0.801391	0.00966095	2.71497	0.42979	0.750668	2.87055	0.00702693	2.44856	8.36218	2.47706	0.091329	-1.991	0.944182	0.955319	0.94655	0.936856
		282	1.21085	1.6467	2.44678	3.53004	0.847747	0.00973558	2.08434	0.391352	0.782826	2.87326	0.00482143	2.58058	10.4834	6.01246	0.096419	-1.99659	0.949357	0.947027	0.922684	0.913626
		283	1.23276	1.63456	2.14712	2.79897	0.866578	0.00973893	2.97701	0.390189	1.09655	2.87903	0.00578802	2.43613	9.96564	2.43384	0.0961937	-1.99071	0.949794	0.92096	0.955176	0.936956
		284	1.20785	1.64978	2.80135	3.26207	0.836986	0.00973603	2.99117	0.389116	0.587551	2.87902	0.00699841	2.58039	9.49889	1.37503	0.0993295	-1.96186	0.93734	0.960784	0.948453	0.936335
		285	1.23276	1.58569	1.71981	2.36013	1.21718	0.00973891	2.97922	0.390204	0.731291	2.97358	0.004907	2.43564	14.641	3.28173	0.0988983	-1.98481	0.945468	0.939149	0.955625	0.940352
		286	1.2286	1.47589	2.20563	3.60097	1.29583	0.00845108	2.94187	0.474564	0.928563	2.86691	0.00594405	2.02969	10.3007	7.36192	0.0876702	-1.99267	0.950653	0.916975	0.96084	0.930469
		287	1.198	1.64989	2.81804	2.40828	0.834334	0.00971647	2.99205	0.402102	0.594395	2.97448	0.00699227	2.62484	14.6321	1.79531	0.0963084	-1.99072	0.940551	0.955134	0.955949	0.937787
		288	1.20795	1.64987	2.84814	3.26207	0.828628	0.00972459	2.99172	0.429735	0.745392	2.88266	0.00670913	2.44268	8.27762	2.39568	0.0963439	-1.94695	0.944513	0.952161	0.952606	0.937472
		289	1.20919	1.64931	2.34092	3.2433	1.27421	0.00997858	2.93173	0.446191	2.86779	0.32562	0.00268501	2.59319	1.32489	19.0042	0.0958532	1.99283	0.92876	0.966086	0.954751	0.844365
		290	1.21806	1.64954	2.43995	3.27514	0.802017	0.00976791	2.20579	0.452779	0.740689	2.89258	0.00431579	2.5826	10.4844	6.01246	0.0792388	-1.99133	0.949545	0.940704	0.940253	0.910701
		291	1.20919	1.64931	2.33001	3.2433	1.27421	0.00990834	2.93173	0.446889	2.86779	0.32562	0.00268501	2.59319	3.27606	9.46296	0.0959076	1.99283	0.919095	0.96087	0.955033	0.899048
		292	1.21031	1.6467	2.44678	3.53004	0.847747	0.00969372	2.19956	0.391352	0.801161	2.87345	0.00436173	2.56037	10.4834	6.01282	0.0980867	-1.99974	0.949787	0.943421	0.92696	0.917809
		293	1.23276	1.58569	1.71981	2.36013	1.21718	0.00973838	2.97922	0.390204	0.731291	2.97366	0.00702856	2.43564	14.6319	3.28173	0.0988636	-1.98481	0.945249	0.945687	0.955603	0.939337
		294	1.2087	1.64895	1.70709	3.19695	0.867226	0.00973578	2.99117	0.407201	0.585972	2.88488	0.00670738	2.26404	13.7543	2.40104	0.0964801	-1.99969	0.939894	0.948856	0.955977	0.940059
		295	1.20709	1.47269	2.20661	3.59971	1.29582	0.00846972	2.9776	0.4685	0.784583	2.88794	0.00668868	2.60258	1.17726	2.25495	0.0907164	-1.79629	0.944096	0.94367	0.960873	0.937362
		296	1.21031	1.47261	2.48272	3.49313	1.33322	0.00846771	2.9794	0.466831	0.773864	2.86456	0.00847681	2.59907	9.32577	1.69206	0.0995937	-1.99781	0.942985	0.950794	0.96122	0.938143
		297	1.2329	1.58693	1.68823	2.42219	1.29528	0.00973943	2.80683	0.389538	0.718312	2.97358	0.00502146	2.43564	14.641	3.28173	0.0992232	-1.8443	0.945018	0.941556	0.952458	0.940288
		298	1.21031	1.47261	2.48272	3.52909	1.33349	0.00846771	2.9794	0.466831	0.568319	2.86456	0.00853175	2.59907	9.35418	1.69206	0.0906506	-1.99781	0.936741	0.955757	0.960468	0.936345
		299	1.21245	1.60466	2.56666	3.23644	0.84955	0.00895342	2.88203	0.454484	0.937314	2.9879	0.00707055	2.32106	3.01143	5.64639	0.090806	-1.94774	0.949289	0.928594	0.956772	0.931761
		300	1.21245	1.60466	2.56666	3.23644	0.84955	0.00895342	2.54848	0.454484	0.937314	2.9879	0.00707055	2.32106	3.01143	5.64639	0.090806	-1.94774	0.949488	0.932821	0.951792	0.931443
		301	1.21044	1.63447	2.47385	2.48244	1.30411	0.00989926	2.99999	0.446164	2.98393	0.3	0.00320444	3.12207	2.17912	17.6386	0.0999568	1.99225	0.930499	0.963681	0.955247	0.802009
		302	1.21036	1.64931	2.34092	2.59281	1.27395	0.00997858	2.99918	0.446199	2.00469	0.300149	0.00268501	2.59979	1.03345	19.0042	0.0958346	1.99284	0.926718	0.961708	0.95566	0.849611
		303	1.19694	1.64985	2.78485	3.22898	0.847386	0.00977291	2.98136	0.3889	0.369853	2.89245	0.00480334	2.60641	10.1908	7.70488	0.0981513	-1.96127	0.939349	0.960642	0.944721	0.877973
		304	1.27733	1.63989	2.14482	2.72376	1.3008	0.00939849	2.9126	0.405695	0.478346	2.81025	0.00920222	2.23564	14.7548	2.47855	0.0910723	-1.9607	0.908495	0.960051	0.951598	0.937354
		305	1.20919	1.64931	2.34092	3.2433	1.27421	0.00997858	2.93173	0.44619	2.86779	0.32562	0.00321431	3.11818	2.16532	19.0083	0.0815288	1.99283	0.934003	0.966378	0.954799	0.759138
		306	1.23192	1.64896	1.71517	2.56351	0.866578	0.00972503	2.99105	0.407546	0.600499	2.89329	0.00669569	2.26404	13.6786	2.40104	0.0964801	-1.99968	0.93834	0.951148	0.957234	0.940403
		307	1.21492	1.65	2.13858	2.88955	1.19802	0.00940356	2.92165	0.439614	0.604026	2.94876	0.00631931	2.24974	12.945	2.84362	0.0960607	-1.96769	0.940775	0.950864	0.954418	0.940013
		308	1.21027	1.64926	2.46598	3.48975	1.29053	0.00902793	2.99706	0.389207	0.563015	2.96491	0.00581719	2.58677	10.6983	6.01246	0.0982349	-1.9763	0.945418	0.951929	0.956884	0.912939
		309	1.21194	1.64926	2.46598	3.48975	1.29053	0.00903595	2.99289	0.389207	0.541862	2.96709	0.00675088	2.58677	10.6618	6.01246	0.096594	-1.9763	0.94449	0.955167	0.956857	0.908411
		310	1.21082	1.64794	2.78765	3.26965	0.783559	0.00966911	2.94137	0.455672	0.548103	2.99222	0.00732125	2.62446	9.29683	1.29551	0.0781562	-1.8254	0.936733	0.960596	0.952657	0.934077
	8	311	1.54386	1.54067	0.542189	3.22934	1.50744	0.00928979	2.98829	0.315295	1.97133	0.379918	0.00124244	1.70921	12.2542	18.7399	0.0999835	1.74246	0.406393	0.963062	0.960142	0.799357
		312	1.21615	1.56383	1.21316	3.71881	1.59189	0.00913577	2.98708	0.426491	0.618915	2.98027	0.00800415	2.00929	14.3762	7.06558	0.0998799	-1.9853	0.945655	0.942379	0.960098	0.93251
		313	1.21232	1.56379	2.80659	3.23787	1.57175	0.00902479	2.77163	0.465775	0.609958	2.92215	0.00799341	2.0029	13.4257	7.16133	0.0989322	-1.99124	0.944152	0.95554	0.957093	0.932448
		314	1.19938	1.5828	2.9165	3.32101	1.58967	0.00883766	2.98451	0.425967	0.509309	2.95582	0.0077808	2.02876	11.6723	6.82791	0.1	-1.72817	0.939961	0.955459	0.960111	0.934357
		315	1.54386	1.54058	0.543879	3.34777	1.49365	0.00924436	2.98958	0.315655	2.03319	0.401605	0.00145008	1.64458	12.2549	18.1585	0.0997153	1.74439	0.403305	0.960864	0.960317	0.819607
		316	1.19841	1.50072	2.7579	2.9034	0.614692	0.00908319	2.43569	0.426587	0.640579	2.97895	0.00493479	2.51891	14.3167	9.10888	0.0993029	-1.95073	0.949629	0.940613	0.914262	0.891973
		317	1.21018	1.56122	2.58039	3.22029	1.64798	0.00913415	2.77381	0.517863	0.563205	2.96025	0.0109609	1.9554	11.841	7.15109	0.0989259	-1.99125	0.939361	0.960644	0.955569	0.930219
		318	1.22314	1.53944	2.69694	3.22345	1.83997	0.00908061	2.98284	0.41949	0.919782	2.92757	0.00744791	1.98864	18.3086	5.97936	0.0999564	-1.95733	0.949455	0.935317	0.958283	0.936565
		319	1.2232	1.49656	2.61989	3.25576	1.83574	0.00902258	2.98301	0.444669	0.74697	2.96507	0.00939888	1.89887	14.2252	7.00024	0.0997541	-1.97977	0.945447	0.950751	0.957327	0.935106
		320	1.20995	1.44041	2.79593	3.23532	1.9474	0.00904955	1.74358	0.426724	1.02507	2.88098	0.00784368	2.01161	14.2631	9.15972	0.0999741	-1.99155	0.949784	0.940624	0.905279	0.925477
		321	1.49246	1.46234	0.685757	2.99414	1.69969	0.00960391	2.98165	0.425408	2.57584	0.401591	0.00124244	1.6943	17.064	18.1677	0.0978399	1.99194	0.558798	0.966188	0.957466	0.841026
		322	1.49461	1.56007	0.671471	2.99415	1.57646	0.00952097	2.98261	0.423066	2.16999	0.399687	0.00124244	1.90388	16.5649	17.8096	0.0999573	1.92039	0.590372	0.966445	0.944233	0.806872
		323	1.49245	1.56265	0.67417	2.85753	1.49251	0.00960462	2.98932	0.307773	2.04623	0.398743	0.00124244	1.89786	12.2211	18.7399	0.0727286	1.82805	0.570824	0.96583	0.95652	0.774494
		324	1.19938	1.58135	2.9165	3.32101	1.58967	0.00883766	2.98449	0.425377	0.509309	2.95667	0.00551394	2.01107	11.714	6.82791	0.1	-1.99515	0.939889	0.952157	0.960122	0.937368
		325	1.49214	1.55871	0.66892	2.99467	1.41086	0.00960385	2.97879	0.426413	2.05964	0.399687	0.0012807	1.89725	14.3056	18.7399	0.0980811	1.92223	0.590286	0.965892	0.950004	0.796326
		326	1.49461	1.56007	0.671471	2.99415	1.57646	0.00961627	2.98261	0.469536	2.16999	0.399687	0.00124244	1.90388	16.5649	17.8096	0.0999573	1.92039	0.594348	0.96596	0.938356	0.805236
		327	1.23189	1.47188	0.603166	3.6834	1.5669	0.0091127	2.90208	0.516685	0.388961	2.98151	0.00799797	1.66306	14.6409	5.60773	0.096146	-1.99108	0.925617	0.9417	0.960728	0.940527
		328	1.21389	1.56875	2.79397	3.27844	1.58846	0.00902145	2.98127	0.443761	0.642202	2.94748	0.00932775	2.01097	11.8254	4.30795	0.0989434	-1.97977	0.940122	0.957215	0.959667	0.940016
		329	1.23349	1.5535	1.352	3.67159	1.82849	0.00921006	2.98041	0.424329	0.919843	2.93644	0.00800386	2.0872	17.1193	5.91536	0.0955006	-1.99877	0.949865	0.921535	0.960584	0.932797
		330	1.49246	1.55871	0.997736	2.85804	1.40953	0.00960391	2.97879	0.426413	2.05964	0.399687	0.0012807	1.89726	7.34136	18.7399	0.0978675	1.92223	0.58022	0.965603	0.951034	0.805381
		331	1.49246	1.46234	0.673988	2.99414	1.69969	0.00960391	2.98165	0.429326	2.57584	0.401591	0.00124244	1.6943	12.2093	18.1677	0.097845	1.99298	0.556961	0.966117	0.957371	0.846757
		332	1.17898	1.35052	2.71924	3.14157	0.62299	0.00923634	2.52369	0.425622	0.91333	2.96495	0.00796607	1.96774	14.1287	5.92917	0.0997724	-1.95663	0.949498	0.945297	0.807245	0.933307
		333	1.2227	1.49231	1.15948	3.23969	1.32677	0.00905784	3	0.445403	0.743094	2.90202	0.00773672	2.02918	15.4208	5.82552	0.0973574	-1.9584	0.947333	0.933885	0.960682	0.93582
		334	1.49246	1.55871	0.668933	2.85804	1.40953	0.00960391	2.97879	0.42641	2.05964	0.399687	0.00124223	1.89724	14.3056	18.7399	0.0978675	1.87045	0.594521	0.965827	0.947244	0.798755
		335	1.49214	1.55871	0.66892	2.99467	1.41086	0.00960385	2.97879	0.426413	2.05964	0.399687	0.0012807	1.89725	9.11433	18.7399	0.0980811	1.92223	0.586903	0.966367	0.949989	0.804874
		336	1.21125	1.56122	2.58039	3.22029	1.6462	0.00913034	2.98023	0.517863	0.564876	2.96025	0.0109609	2.00991	11.8423	4.3625	0.0989259	-1.99126	0.935796	0.960754	0.956686	0.939329
		337	1.49417	1.56007	0.671868	3.00822	1.57069	0.00961627	2.99014	0.423509	1.97125	0.399687	0.001242	1.62381	16.5649	17.8096	0.0999573	1.92039	0.571435	0.965848	0.94898	0.850339
		338	1.49246	1.55871	0.66892	2.99415	1.70225	0.00960391	2.98893	0.426413	2.05608	0.399669	0.00107704	2.01819	17.0622	18.7661	0.0978744	1.92223	0.602225	0.967515	0.944423	0.773432
		339	1.49246	1.46234	0.670535	2.99413	1.69969	0.00960391	2.98934	0.425971	2.05964	0.399687	0.00128091	1.89781	17.1661	18.7399	0.0978399	1.92434	0.565462	0.966884	0.957727	0.791524
