# Supplementary material for: The benefits and trade-offs of multi-variable calibration of the WaterGAP global hydrological model (WGHM) in the Ganges and Brahmaputra basins
Source: Copernicus journal article supplement (doi:10.5194/hess-29-567-2025), 2025-01-30
Supplement: Supplementary file [file hess-29-567-2025-supplement-title-page.pdf › hess-29-567-2025-supplement-title-page.pdf]

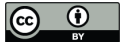

*Supplement of*

**The benefits and trade-offs of multi-variable calibration  
of the WaterGAP global hydrological model (WGHM)  
in the Ganges and Brahmaputra basins**

**Howlader Mohammad Mehedi Hasan et al.**

*Correspondence to:* Howlader Mohammad Mehedi Hasan ([mehedi.hasan@gfz-potsdam.de](mailto:mehedi.hasan@gfz-potsdam.de))

- [hess-29-567-2025-supplement-title-page.pdf](#)
- [Hasan\\_et\\_al\\_Supplement\\_B.xlsx](#)
- [Hasan\\_et\\_al\\_supplement\\_A.pdf](#)

The copyright of individual parts of the supplement might differ from the article licence.
